# Supplementary material for: Transcriptomic analysis reveals the oncogenic role of S6K1 in hepatocellular carcinoma
Source: PubMed Central journal article supplement (PMC7065997; doi:10.7150/jca.40726), 2020-02-19
Supplement: jcav11p2645s1.pdf [file jcav11p2645s1.pdf]

**Supplementary Table 1**

| <b>Gene</b> | <b>primer sequence</b>  |
|-------------|-------------------------|
| S6K1_F      | taaagggggctatggaaagg    |
| S6K1_R      | ttaagcaccttcattggcaaat  |
| RASSF6_F    | cccaggattttgctcttcac    |
| RASSF6_R    | cctctgcagtagcggaaatgt   |
| CDKN1A_F    | ccgaagtcagttccttgagg    |
| CDKN1A_R    | catgggttctgacggacat     |
| DAPK2_F     | acgtggtgctcatccttga     |
| DAPK2_R     | tgacctcctcactca         |
| TP53I3_F    | tctctgaagcaacgctgaaa    |
| TP53I3_R    | gtaggatccgcctatgcagt    |
| SKP2_F      | ctgtctcaaggggtgattgc    |
| SKP2_R      | ttcgataggtccatgtgctg    |
| SERBP1_F    | gcagcaggaccgacaagt      |
| SERBP1_R    | tgtcttatggcatccagttaagc |
| CEACAM1_F   | cccatcatgctgaacgtaaa    |
| CEACAM1_R   | agggccactactccaatcac    |
| GAPDH_F     | ccccggttctataaattgagc   |
| GAPDH_R     | cgaacaggaggagcagagag    |

**Supplementary Table 2**

| Clinicopathological features | Frequency (%) | S6K1 overexpression           |                | p value* |
|------------------------------|---------------|-------------------------------|----------------|----------|
|                              |               | Mean $\pm$ SD/Number of cases |                |          |
|                              |               | Negative                      | Positive       |          |
| Age (year)                   |               |                               |                |          |
| <59                          | 32 (46.4%)    | 21                            | 11             | 0.508    |
| $\geq$ 59                    | 37 (53.6%)    | 27                            | 10             |          |
| Sex                          |               |                               |                |          |
| Male                         | 51 (73.9%)    | 38                            | 13             | 0.133    |
| Female                       | 18 (26.1%)    | 10                            | 8              |          |
| Family History               |               |                               |                |          |
| Yes                          | 12 (17.4%)    | 8                             | 4              | 0.81     |
| No                           | 57 (82.6%)    | 40                            | 17             |          |
| Smoke                        |               |                               |                |          |
| No                           | 37 (53.6%)    | 22                            | 15             | 0.05     |
| Yes                          | 32 (46.4%)    | 26                            | 6              |          |
| Drink                        |               |                               |                |          |
| No                           | 47 (68.1%)    | 31                            | 16             | 0.341    |
| Yes                          | 22 (31.9%)    | 17                            | 5              |          |
| HBV carrier                  |               |                               |                |          |
| No                           | 16 (23.2%)    | 11                            | 5              | 0.936    |
| Yes                          | 53 (76.8%)    | 37                            | 16             |          |
| Albumin (g/l)                |               | 39.0 $\pm$ 4.5                | 39.1 $\pm$ 5.5 | 0.942    |
| HBsAg                        |               |                               |                |          |
| Positive                     | 61 (88.4%)    | 42                            | 19             | 0.722    |
| Negative                     | 8 (11.6%)     | 6                             | 2              |          |
| Tumor recurrence             |               |                               |                |          |
| Absence                      | 20 (29.0%)    | 14                            | 6              | 0.96     |
| Presence                     | 49 (71.0%)    | 34                            | 15             |          |
| Tumor size (cm)              |               |                               |                |          |
|                              |               | 8.0 $\pm$ 4.9                 | 8.8 $\pm$ 6.1  | 0.599    |
| Number of tumor nodules      |               |                               |                |          |
| 1                            | 46 (66.7%)    | 31                            | 15             | 0.579    |
| $\geq$ 2                     | 23 (33.3%)    | 17                            | 6              |          |
| Differentiation**            |               |                               |                |          |
| Well                         | 9 (13.4%)     | 4                             | 5              | 0.092    |
| Moderately                   | 42 (70.5%)    | 29                            | 13             |          |
| Poorly                       | 15 (16.1%)    | 13                            | 2              |          |
| Venous infiltration**        |               |                               |                |          |
| Absence                      | 34 (51.5%)    | 20                            | 14             | 0.092    |
| Presence                     | 32 (48.5%)    | 25                            | 7              |          |
| TNM                          |               |                               |                |          |
| I/II                         | 31 (44.9%)    | 19                            | 12             | 0.177    |
| III/IV                       | 38 (55.1%)    | 29                            | 9              |          |
| AJCC                         |               |                               |                |          |
| I/II                         | 40 (58.0%)    | 27                            | 13             | 0.661    |
| III/IV                       | 29 (42.0%)    | 21                            | 8              |          |

**Supplementary Table 3**

| Gene symbol  | log2 fold change<br>(shS6K1/shCtrl) | log2 counts<br>per million | Gene ID         | Gene description                                                                   |
|--------------|-------------------------------------|----------------------------|-----------------|------------------------------------------------------------------------------------|
| MMP7         | 10.78                               | 2.70                       | ENSG00000137673 | matrix metalloproteinase 7                                                         |
| LCN2         | 7.06                                | 2.15                       | ENSG00000148346 | lipocalin 2                                                                        |
| PIRT         | 6.19                                | 2.21                       | ENSG00000233670 | phosphoinositide interacting regulator of<br>transient receptor potential channels |
| GAS7         | 6.01                                | 2.58                       | ENSG00000007237 | growth arrest specific 7                                                           |
| TM4SF1       | 5.27                                | 4.29                       | ENSG00000169908 | transmembrane 4 L six family member 1                                              |
| EHF          | 5.14                                | 2.13                       | ENSG00000135373 | ETS homologous factor                                                              |
| TPPP3        | 4.96                                | 1.04                       | ENSG00000159713 | tubulin polymerization promoting<br>protein family member 3                        |
| TNF          | 4.68                                | 1.32                       | ENSG00000230108 | tumor necrosis factor                                                              |
| ZNF385C      | 4.59                                | 2.73                       | ENSG00000187595 | zinc finger protein 385C                                                           |
| SULT1E1      | 4.48                                | 2.28                       | ENSG00000109193 | sulfotransferase family 1E member 1                                                |
| FEZ1         | 4.46                                | 3.02                       | ENSG00000149557 | fasciculation and elongation protein zeta<br>1                                     |
| RP11-79H23.3 | 4.36                                | 1.71                       | ENSG00000261618 | N/A                                                                                |
| PLAT         | 4.20                                | 2.02                       | ENSG00000104368 | plasminogen activator, tissue type                                                 |
| HAS2         | 4.05                                | 3.55                       | ENSG00000170961 | hyaluronan synthase 2                                                              |
| ITGAM        | 3.95                                | 2.42                       | ENSG00000169896 | integrin subunit alpha M                                                           |
| ITGB6        | 3.82                                | 1.21                       | ENSG00000115221 | integrin subunit beta 6                                                            |
| BIRC3        | 3.77                                | 6.99                       | ENSG00000023445 | baculoviral IAP repeat containing 3                                                |
| AZGP1        | 3.70                                | 2.72                       | ENSG00000160862 | alpha-2-glycoprotein 1, zinc-binding                                               |
| ZDHHC1       | 3.65                                | 1.87                       | ENSG00000159714 | zinc finger DHHC-type containing 1                                                 |
| TNFRSF9      | 3.59                                | 1.82                       | ENSG00000049249 | TNF receptor superfamily member 9                                                  |
| FOS          | 3.56                                | 3.04                       | ENSG00000170345 | Fos proto-oncogene, AP-1 transcription<br>factor subunit                           |
| COL1A2       | 3.44                                | 2.30                       | ENSG00000164692 | collagen type I alpha 2 chain                                                      |
| WNT10A       | 3.43                                | 1.51                       | ENSG00000135925 | Wnt family member 10A                                                              |
| CDC20B       | 3.35                                | 4.15                       | ENSG00000164287 | cell division cycle 20B                                                            |
| PLAU         | 3.33                                | 3.53                       | ENSG00000122861 | plasminogen activator, urokinase                                                   |
| PLXDC2       | 3.30                                | 4.99                       | ENSG00000120594 | plexin domain containing 2                                                         |
| TLR1         | 3.24                                | 1.90                       | ENSG00000174125 | toll like receptor 1                                                               |
| SHISA4       | 3.23                                | 1.77                       | ENSG00000198892 | shisa family member 4                                                              |
| GBP2         | 3.19                                | 3.49                       | ENSG00000162645 | guanylate binding protein 2                                                        |
| POU2F2       | 3.12                                | 3.87                       | ENSG00000028277 | POU class 2 homeobox 2                                                             |

|          |      |      |                 |                                                                     |
|----------|------|------|-----------------|---------------------------------------------------------------------|
| CTNNA2   | 3.08 | 3.05 | ENSG00000066032 | catenin alpha 2                                                     |
| PLA1A    | 3.08 | 2.47 | ENSG00000144837 | phospholipase A1 member A                                           |
| OR12D2   | 3.07 | 2.24 | ENSG00000235966 | olfactory receptor family 12 subfamily D member 2 (gene/pseudogene) |
| MRC2     | 3.04 | 1.61 | ENSG00000011028 | mannose receptor C type 2                                           |
| SLFN11   | 3.04 | 3.10 | ENSG00000172716 | schlafen family member 11                                           |
| CXCL3    | 3.00 | 5.15 | ENSG00000163734 | C-X-C motif chemokine ligand 3                                      |
| NT5E     | 2.97 | 6.48 | ENSG00000135318 | 5'-nucleotidase ecto                                                |
| CXCL2    | 2.96 | 4.72 | ENSG00000081041 | C-X-C motif chemokine ligand 2                                      |
| CADPS    | 2.95 | 2.79 | ENSG00000163618 | calcium dependent secretion activator                               |
| STAT4    | 2.92 | 2.11 | ENSG00000138378 | signal transducer and activator of transcription 4                  |
| COL11A2  | 2.89 | 2.56 | ENSG00000206290 | collagen type XI alpha 2 chain                                      |
| S100A11  | 2.87 | 5.90 | ENSG00000163191 | S100 calcium binding protein A11                                    |
| CTSS     | 2.85 | 2.47 | ENSG00000163131 | cathepsin S                                                         |
| CAV1     | 2.84 | 4.71 | ENSG00000105974 | caveolin 1                                                          |
| GALNT6   | 2.81 | 1.14 | ENSG00000139629 | polypeptide N-acetylgalactosaminyltransferase 6                     |
| UNC93A   | 2.81 | 1.74 | ENSG00000112494 | unc-93 homolog A (C. elegans)                                       |
| LOXL2    | 2.81 | 5.27 | ENSG00000134013 | lysyl oxidase like 2                                                |
| TIMP1    | 2.80 | 3.35 | ENSG00000102265 | TIMP metalloproteinase inhibitor 1                                  |
| ACTA1    | 2.79 | 2.15 | ENSG00000143632 | actin, alpha 1, skeletal muscle                                     |
| UGT2B15  | 2.78 | 2.58 | ENSG00000277132 | UDP glucuronosyltransferase family 2 member B15                     |
| MMP19    | 2.73 | 1.94 | ENSG00000123342 | matrix metalloproteinase 19                                         |
| OLFML2A  | 2.73 | 3.18 | ENSG00000185585 | olfactomedin like 2A                                                |
| LTB      | 2.72 | 8.05 | ENSG00000223448 | lymphotoxin beta                                                    |
| C7       | 2.71 | 3.36 | ENSG00000112936 | complement C7                                                       |
| NEURL3   | 2.69 | 2.97 | ENSG00000163121 | neuralized E3 ubiquitin protein ligase 3                            |
| KIAA0319 | 2.65 | 1.61 | ENSG00000137261 | KIAA0319                                                            |
| RHOJ     | 2.65 | 1.79 | ENSG00000126785 | ras homolog family member J                                         |
| PLCXD3   | 2.64 | 4.22 | ENSG00000182836 | phosphatidylinositol specific phospholipase C X domain containing 3 |
| MTMR11   | 2.60 | 2.49 | ENSG00000014914 | myotubularin related protein 11                                     |
| INHHA    | 2.59 | 1.10 | ENSG00000123999 | inhibin alpha subunit                                               |
| QPCT     | 2.58 | 1.45 | ENSG00000115828 | glutaminyl-peptide cyclotransferase                                 |
| IFI6     | 2.58 | 4.57 | ENSG00000126709 | interferon alpha inducible protein 6                                |

|              |      |      |                 |                                                             |
|--------------|------|------|-----------------|-------------------------------------------------------------|
| S1PR1        | 2.46 | 1.35 | ENSG00000170989 | sphingosine-1-phosphate receptor 1                          |
| IL7          | 2.44 | 1.23 | ENSG00000104432 | interleukin 7                                               |
| CACNG4       | 2.42 | 5.27 | ENSG00000075461 | calcium voltage-gated channel auxiliary subunit gamma 4     |
| RND1         | 2.41 | 5.29 | ENSG00000172602 | Rho family GTPase 1                                         |
| EGR1         | 2.40 | 7.59 | ENSG00000120738 | early growth response 1                                     |
| CXCL10       | 2.37 | 2.92 | ENSG00000169245 | C-X-C motif chemokine ligand 10                             |
| TNFAIP3      | 2.35 | 6.15 | ENSG00000118503 | TNF alpha induced protein 3                                 |
| SAMD14       | 2.34 | 2.27 | ENSG00000167100 | sterile alpha motif domain containing 14                    |
| PLXNB3       | 2.34 | 2.67 | ENSG00000198753 | plexin B3                                                   |
| LYZ          | 2.33 | 5.26 | ENSG00000090382 | lysozyme                                                    |
| AKR1D1       | 2.32 | 1.52 | ENSG00000122787 | aldo-keto reductase family 1 member D1                      |
| FAM46C       | 2.31 | 2.39 | ENSG00000183508 | family with sequence similarity 46 member C                 |
| HLA-DMA      | 2.31 | 1.75 | ENSG00000243215 | major histocompatibility complex, class II, DM alpha        |
| BIK          | 2.30 | 1.41 | ENSG00000100290 | BCL2 interacting killer                                     |
| SCUBE2       | 2.29 | 1.32 | ENSG00000175356 | signal peptide, CUB domain and EGF like domain containing 2 |
| TUBA1A       | 2.28 | 5.83 | ENSG00000167552 | tubulin alpha 1a                                            |
| VNN3         | 2.25 | 4.09 | ENSG00000093134 | vanin 3                                                     |
| FRMD4A       | 2.23 | 3.86 | ENSG00000151474 | FERM domain containing 4A                                   |
| STRA6        | 2.21 | 4.69 | ENSG00000137868 | stimulated by retinoic acid 6                               |
| ZC3H12A      | 2.20 | 5.81 | ENSG00000163874 | zinc finger CCCH-type containing 12A                        |
| RP11-47L3.1  | 2.20 | 5.02 | ENSG00000267364 | N/A                                                         |
| LAMC2        | 2.19 | 4.17 | ENSG00000058085 | laminin subunit gamma 2                                     |
| EFNA5        | 2.16 | 1.12 | ENSG00000184349 | ephrin A5                                                   |
| PTAFR        | 2.16 | 1.40 | ENSG00000169403 | platelet activating factor receptor                         |
| RP11-20I20.4 | 2.15 | 4.74 | ENSG00000273179 | N/A                                                         |
| UGT3A1       | 2.14 | 4.22 | ENSG00000145626 | UDP glycosyltransferase family 3 member A1                  |
| CD109        | 2.14 | 2.11 | ENSG00000156535 | CD109 molecule                                              |
| SLC44A2      | 2.13 | 2.55 | ENSG00000129353 | solute carrier family 44 member 2                           |
| LINC00511    | 2.11 | 4.94 | ENSG00000227036 | long intergenic non-protein coding RNA 511                  |
| CSF1         | 2.11 | 5.82 | ENSG00000184371 | colony stimulating factor 1                                 |
| ODAM         | 2.09 | 2.12 | ENSG00000109205 | odontogenic, ameloblast associated                          |

|               |      |      |                 |                                                  |
|---------------|------|------|-----------------|--------------------------------------------------|
| PCSK5         | 2.08 | 5.70 | ENSG00000099139 | proprotein convertase subtilisin/kexin type 5    |
| ICAM1         | 2.08 | 8.83 | ENSG00000090339 | intercellular adhesion molecule 1                |
| BAALC         | 2.08 | 1.15 | ENSG00000164929 | brain and acute leukemia, cytoplasmic            |
| MAP3K8        | 2.07 | 4.13 | ENSG00000107968 | mitogen-activated protein kinase kinase kinase 8 |
| RP11-103J17.2 | 2.06 | 3.19 | ENSG00000261761 | N/A                                              |
| IP6K3         | 2.05 | 1.62 | ENSG00000161896 | inositol hexakisphosphate kinase 3               |
| HMCN1         | 2.05 | 1.81 | ENSG00000143341 | hemicentin 1                                     |
| QSOX1         | 2.05 | 7.20 | ENSG00000116260 | quiescin sulfhydryl oxidase 1                    |
| SGK1          | 2.04 | 6.54 | ENSG00000118515 | serum/glucocorticoid regulated kinase 1          |
| CXCL6         | 2.02 | 5.93 | ENSG00000124875 | C-X-C motif chemokine ligand 6                   |
| NCOA7         | 1.99 | 6.18 | ENSG00000111912 | nuclear receptor coactivator 7                   |
| GXYLT2        | 1.98 | 2.57 | ENSG00000172986 | glucoside xylosyltransferase 2                   |
| PDGFB         | 1.97 | 4.76 | ENSG00000100311 | platelet derived growth factor subunit B         |
| C6            | 1.97 | 4.03 | ENSG00000039537 | complement C6                                    |
| PDK4          | 1.96 | 1.15 | ENSG00000004799 | pyruvate dehydrogenase kinase 4                  |
| SP140L        | 1.96 | 2.20 | ENSG00000185404 | SP140 nuclear body protein like                  |
| COL7A1        | 1.94 | 1.95 | ENSG00000114270 | collagen type VII alpha 1 chain                  |
| UGT2A3        | 1.92 | 3.70 | ENSG00000135220 | UDP glucuronosyltransferase family 2 member A3   |
| HOXD1         | 1.91 | 3.87 | ENSG00000128645 | homeobox D1                                      |
| GABARAPL1     | 1.90 | 4.19 | ENSG00000139112 | GABA type A receptor associated protein like 1   |
| C3orf70       | 1.90 | 1.51 | ENSG00000187068 | chromosome 3 open reading frame 70               |
| EMP3          | 1.90 | 1.28 | ENSG00000142227 | epithelial membrane protein 3                    |
| CACNA1D       | 1.89 | 3.28 | ENSG00000157388 | calcium voltage-gated channel subunit alpha 1 D  |
| SV2A          | 1.88 | 4.91 | ENSG00000159164 | synaptic vesicle glycoprotein 2A                 |
| FSTL1         | 1.88 | 4.64 | ENSG00000163430 | folliculin like 1                                |
| PDIA2         | 1.88 | 1.26 | ENSG00000185615 | protein disulfide isomerase family A member 2    |
| C1R           | 1.88 | 3.42 | ENSG00000159403 | complement C1r                                   |
| CA9           | 1.87 | 2.34 | ENSG00000107159 | carbonic anhydrase 9                             |
| GPX8          | 1.86 | 2.41 | ENSG00000164294 | glutathione peroxidase 8 (putative)              |
| MOXD1         | 1.86 | 4.98 | ENSG00000079931 | monooxygenase DBH like 1                         |
| SDC4          | 1.85 | 8.89 | ENSG00000124145 | syndecan 4                                       |

|            |      |      |                 |                                                 |
|------------|------|------|-----------------|-------------------------------------------------|
| C8orf4     | 1.85 | 6.41 | ENSG00000176907 | chromosome 8 open reading frame 4               |
| SNAP91     | 1.83 | 3.36 | ENSG00000065609 | synaptosome associated protein 91               |
| PRG4       | 1.82 | 2.18 | ENSG00000116690 | proteoglycan 4                                  |
| UNC5CL     | 1.82 | 1.63 | ENSG00000124602 | unc-5 family C-terminal like                    |
| LRP4       | 1.81 | 4.66 | ENSG00000134569 | LDL receptor related protein 4                  |
| DACH1      | 1.80 | 1.21 | ENSG00000276644 | dachshund family transcription factor 1         |
| SEMA3D     | 1.80 | 3.70 | ENSG00000153993 | semaphorin 3D                                   |
| RHOH       | 1.80 | 1.03 | ENSG00000168421 | ras homolog family member H                     |
| GUCY1B3    | 1.80 | 3.58 | ENSG00000061918 | guanylate cyclase 1 soluble subunit beta        |
| MUC6       | 1.80 | 2.46 | ENSG00000283350 | mucin 6, oligomeric mucus/gel-forming           |
| COTL1      | 1.79 | 6.06 | ENSG00000103187 | coactosin like F-actin binding protein 1        |
| FRMD4B     | 1.79 | 2.12 | ENSG00000114541 | FERM domain containing 4B                       |
| SPON2      | 1.79 | 8.07 | ENSG00000159674 | spondin 2                                       |
| DLGAP1-AS2 | 1.78 | 2.64 | ENSG00000262001 | DLGAP1 antisense RNA 2                          |
| SOD3       | 1.77 | 2.02 | ENSG00000109610 | superoxide dismutase 3, extracellular           |
| FAXDC2     | 1.77 | 3.18 | ENSG00000170271 | fatty acid hydroxylase domain containing 2      |
| FGF14      | 1.76 | 2.14 | ENSG00000102466 | fibroblast growth factor 14                     |
| HLA-B      | 1.74 | 5.33 | ENSG00000206450 | major histocompatibility complex, class I, B    |
| PNMAL2     | 1.74 | 1.31 | ENSG00000204851 | paraneoplastic Ma antigen family like 2         |
| RASSF2     | 1.73 | 1.69 | ENSG00000101265 | Ras association domain family member 2          |
| BHLHE41    | 1.73 | 1.74 | ENSG00000123095 | basic helix-loop-helix family member e41        |
| SOD2       | 1.73 | 8.97 | ENSG00000112096 | superoxide dismutase 2, mitochondrial           |
| CLDN11     | 1.72 | 3.78 | ENSG0000013297  | claudin 11                                      |
| TNFAIP2    | 1.72 | 8.33 | ENSG00000185215 | TNF alpha induced protein 2                     |
| PIK3AP1    | 1.71 | 6.58 | ENSG00000155629 | phosphoinositide-3-kinase adaptor protein 1     |
| SOCS1      | 1.71 | 1.73 | ENSG00000185338 | suppressor of cytokine signaling 1              |
| PDGFRA     | 1.70 | 5.04 | ENSG00000134853 | platelet derived growth factor receptor alpha   |
| HKDC1      | 1.70 | 4.78 | ENSG00000156510 | hexokinase domain containing 1                  |
| PIK3IP1    | 1.69 | 4.24 | ENSG00000100100 | phosphoinositide-3-kinase interacting protein 1 |
| CXCL1      | 1.69 | 7.68 | ENSG00000163739 | C-X-C motif chemokine ligand 1                  |

|               |      |      |                 |                                                               |
|---------------|------|------|-----------------|---------------------------------------------------------------|
| C10orf10      | 1.68 | 5.12 | ENSG00000165507 | chromosome 10 open reading frame 10                           |
| KLKB1         | 1.68 | 1.03 | ENSG00000164344 | kallikrein B1                                                 |
| SPOCK2        | 1.68 | 6.30 | ENSG00000107742 | SPARC/osteonectin, cwcv and kazal like domains proteoglycan 2 |
| JAM2          | 1.67 | 4.33 | ENSG00000154721 | junctional adhesion molecule 2                                |
| CAV2          | 1.67 | 5.26 | ENSG00000105971 | caveolin 2                                                    |
| NFATC4        | 1.66 | 3.86 | ENSG00000100968 | nuclear factor of activated T-cells 4                         |
| AKAP7         | 1.66 | 2.84 | ENSG00000118507 | A-kinase anchoring protein 7                                  |
| PDLIM3        | 1.65 | 2.66 | ENSG00000154553 | PDZ and LIM domain 3                                          |
| ZNF610        | 1.65 | 2.68 | ENSG00000167554 | zinc finger protein 610                                       |
| POPDC2        | 1.65 | 1.09 | ENSG00000121577 | popeye domain containing 2                                    |
| ADPRH         | 1.64 | 2.00 | ENSG00000144843 | ADP-ribosylarginine hydrolase                                 |
| RP11-284F21.9 | 1.64 | 2.09 | ENSG00000272068 | N/A                                                           |
| HLA-E         | 1.63 | 5.68 | ENSG00000225201 | major histocompatibility complex, class I, E                  |
| DACH2         | 1.62 | 2.33 | ENSG00000126733 | dachshund family transcription factor 2                       |
| RNF150        | 1.62 | 2.12 | ENSG00000170153 | ring finger protein 150                                       |
| UBE2L6        | 1.62 | 3.74 | ENSG00000156587 | ubiquitin conjugating enzyme E2 L6                            |
| COL4A4        | 1.61 | 1.94 | ENSG00000081052 | collagen type IV alpha 4 chain                                |
| HR            | 1.61 | 4.39 | ENSG00000168453 | hair growth associated                                        |
| WWTR1         | 1.60 | 6.44 | ENSG00000018408 | WW domain containing transcription regulator 1                |
| PAX6          | 1.59 | 1.84 | ENSG00000007372 | paired box 6                                                  |
| CDC42EP2      | 1.59 | 3.43 | ENSG00000149798 | CDC42 effector protein 2                                      |
| BMF           | 1.59 | 7.44 | ENSG00000104081 | Bcl2 modifying factor                                         |
| CCL20         | 1.59 | 8.78 | ENSG00000115009 | C-C motif chemokine ligand 20                                 |
| APLP1         | 1.59 | 3.58 | ENSG00000105290 | amyloid beta precursor like protein 1                         |
| GATA6-AS1     | 1.59 | 1.74 | ENSG00000266010 | GATA6 antisense RNA 1 (head to head)                          |
| TTYH1         | 1.59 | 5.45 | ENSG00000167614 | tweety family member 1                                        |
| TNFRSF11A     | 1.57 | 2.15 | ENSG00000141655 | TNF receptor superfamily member 11a                           |
| CXCL12        | 1.57 | 7.93 | ENSG00000107562 | C-X-C motif chemokine ligand 12                               |
| DENND6B       | 1.57 | 1.19 | ENSG00000205593 | DENN domain containing 6B                                     |
| DNAH1         | 1.56 | 2.22 | ENSG00000114841 | dynein axonemal heavy chain 1                                 |
| PDE5A         | 1.56 | 5.80 | ENSG00000138735 | phosphodiesterase 5A                                          |
| ADAM8         | 1.56 | 3.78 | ENSG00000151651 | ADAM metalloproteinase domain 8                               |
| SOX5          | 1.55 | 3.42 | ENSG00000134532 | SRY-box 5                                                     |
| CCDC71L       | 1.55 | 1.94 | ENSG00000253276 | coiled-coil domain containing 71-like                         |



|               |      |      |                 |                                                                                     |
|---------------|------|------|-----------------|-------------------------------------------------------------------------------------|
| TCEAL3        | 1.55 | 2.37 | ENSG00000196507 | transcription elongation factor A like 3                                            |
| MVP           | 1.54 | 3.27 | ENSG00000013364 | major vault protein                                                                 |
| ADH6          | 1.54 | 3.69 | ENSG00000172955 | alcohol dehydrogenase 6 (class V)                                                   |
| PTGER4        | 1.54 | 4.91 | ENSG00000171522 | prostaglandin E receptor 4                                                          |
| SUSD5         | 1.54 | 2.06 | ENSG00000173705 | sushi domain containing 5                                                           |
| SPDYE3        | 1.54 | 1.49 | ENSG00000214300 | speedy/RINGO cell cycle regulator family member E3                                  |
| HLA-F         | 1.54 | 1.09 | ENSG00000229698 | major histocompatibility complex, class I, F                                        |
| MAP2          | 1.54 | 5.80 | ENSG00000078018 | microtubule associated protein 2                                                    |
| PPP1R3C       | 1.53 | 2.48 | ENSG00000119938 | protein phosphatase 1 regulatory subunit 3C                                         |
| ALDH8A1       | 1.52 | 3.93 | ENSG00000118514 | aldehyde dehydrogenase 8 family member A1                                           |
| COL9A2        | 1.52 | 6.12 | ENSG00000049089 | collagen type IX alpha 2 chain                                                      |
| RP1-193H18.2  | 1.52 | 1.15 | ENSG00000267194 | N/A                                                                                 |
| TMEM59L       | 1.51 | 3.60 | ENSG00000105696 | transmembrane protein 59 like                                                       |
| TMEM151A      | 1.51 | 2.65 | ENSG00000179292 | transmembrane protein 151A                                                          |
| CPM           | 1.51 | 3.36 | ENSG00000135678 | carboxypeptidase M                                                                  |
| F2RL1         | 1.50 | 4.51 | ENSG00000164251 | F2R like trypsin receptor 1                                                         |
| MTND1P23      | 1.50 | 7.82 | ENSG00000225972 | mitochondrially encoded NADH:ubiquinone oxidoreductase core subunit 1 pseudogene 23 |
| ENO2          | 1.50 | 3.15 | ENSG00000111674 | enolase 2                                                                           |
| TAP1          | 1.50 | 2.84 | ENSG00000232367 | transporter 1, ATP binding cassette subfamily B member                              |
| ABTB2         | 1.50 | 3.63 | ENSG00000166016 | ankyrin repeat and BTB domain containing 2                                          |
| RP5-1085F17.3 | 1.48 | 3.46 | ENSG00000260257 | N/A                                                                                 |
| RFX6          | 1.48 | 2.93 | ENSG00000185002 | regulatory factor X6                                                                |
| SLC27A1       | 1.48 | 2.09 | ENSG00000130304 | solute carrier family 27 member 1                                                   |
| DZIP1L        | 1.47 | 4.73 | ENSG00000158163 | DAZ interacting zinc finger protein 1 like                                          |
| FHOD3         | 1.47 | 3.95 | ENSG00000134775 | formin homology 2 domain containing 3                                               |
| EBLN2         | 1.46 | 1.84 | ENSG00000255423 | endogenous Bornavirus-like nucleoprotein 2                                          |
| SLFN13        | 1.46 | 1.84 | ENSG00000154760 | schlafen family member 13                                                           |

|               |      |      |                 |                                                             |
|---------------|------|------|-----------------|-------------------------------------------------------------|
| ATP10D        | 1.46 | 5.19 | ENSG00000145246 | ATPase phospholipid transporting 10D (putative)             |
| NPY1R         | 1.46 | 1.49 | ENSG00000164128 | neuropeptide Y receptor Y1                                  |
| IQCK          | 1.45 | 4.52 | ENSG00000174628 | IQ motif containing K                                       |
| CACNB3        | 1.45 | 2.95 | ENSG00000167535 | calcium voltage-gated channel auxiliary subunit beta 3      |
| HLA-C         | 1.45 | 6.17 | ENSG00000204525 | major histocompatibility complex, class I, C                |
| HS3ST1        | 1.44 | 3.04 | ENSG00000002587 | heparan sulfate-glucosamine 3-sulfotransferase 1            |
| WDR54         | 1.44 | 3.23 | ENSG00000005448 | WD repeat domain 54                                         |
| LAMB3         | 1.44 | 1.30 | ENSG00000196878 | laminin subunit beta 3                                      |
| RIMKLA        | 1.43 | 1.41 | ENSG00000177181 | ribosomal modification protein rimK like family member A    |
| PARM1         | 1.43 | 2.44 | ENSG00000169116 | prostate androgen-regulated mucin-like protein 1            |
| SLCO2A1       | 1.43 | 2.44 | ENSG00000174640 | solute carrier organic anion transporter family member 2A1  |
| DISP2         | 1.42 | 1.01 | ENSG00000140323 | dispatched RND transporter family member 2                  |
| FBP1          | 1.42 | 1.71 | ENSG00000165140 | fructose-bisphosphatase 1                                   |
| IL32          | 1.42 | 7.72 | ENSG00000008517 | interleukin 32                                              |
| RP11-620J15.3 | 1.41 | 1.56 | ENSG00000257698 | N/A                                                         |
| MAML2         | 1.41 | 3.01 | ENSG00000184384 | mastermind like transcriptional coactivator 2               |
| CTC-297N7.9   | 1.40 | 1.07 | ENSG00000264016 | N/A                                                         |
| SIRPA         | 1.40 | 3.99 | ENSG00000198053 | signal regulatory protein alpha                             |
| ZNF571-AS1    | 1.40 | 3.20 | ENSG00000267470 | ZNF571 antisense RNA 1                                      |
| LGR5          | 1.40 | 6.48 | ENSG00000139292 | leucine rich repeat containing G protein-coupled receptor 5 |
| PRRT2         | 1.39 | 2.09 | ENSG00000167371 | proline rich transmembrane protein 2                        |
| SCN1B         | 1.39 | 1.82 | ENSG00000105711 | sodium voltage-gated channel beta subunit 1                 |
| RFTN2         | 1.38 | 1.38 | ENSG00000162944 | raftlin family member 2                                     |
| ZNF560        | 1.38 | 2.05 | ENSG00000198028 | zinc finger protein 560                                     |
| P2RX4         | 1.38 | 4.22 | ENSG00000135124 | purinergic receptor P2X 4                                   |
| ETS1          | 1.37 | 1.05 | ENSG00000134954 | ETS proto-oncogene 1, transcription factor                  |

|          |      |      |                 |                                                                      |
|----------|------|------|-----------------|----------------------------------------------------------------------|
| MRAP2    | 1.37 | 1.05 | ENSG00000135324 | melanocortin 2 receptor accessory protein 2                          |
| NYAP1    | 1.37 | 1.19 | ENSG00000166924 | neuronal tyrosine phosphorylated phosphoinositide-3-kinase adaptor 1 |
| CBX7     | 1.37 | 1.31 | ENSG00000100307 | chromobox 7                                                          |
| COLCA2   | 1.37 | 3.58 | ENSG00000214290 | colorectal cancer associated 2                                       |
| FZD9     | 1.37 | 3.10 | ENSG00000188763 | frizzled class receptor 9                                            |
| B3GALT1  | 1.37 | 4.90 | ENSG00000172318 | beta-1,3-galactosyltransferase 1                                     |
| JAK1     | 1.36 | 7.71 | ENSG00000162434 | Janus kinase 1                                                       |
| TLR2     | 1.35 | 2.71 | ENSG00000137462 | toll like receptor 2                                                 |
| CAPS     | 1.34 | 4.52 | ENSG00000105519 | calcyphosine                                                         |
| LRRC23   | 1.34 | 1.84 | ENSG0000010626  | leucine rich repeat containing 23                                    |
| HLA-A    | 1.34 | 8.38 | ENSG00000224320 | major histocompatibility complex, class I, A                         |
| ANXA6    | 1.33 | 3.53 | ENSG00000197043 | annexin A6                                                           |
| EXTL3    | 1.33 | 7.57 | ENSG0000012232  | exostosin like glycosyltransferase 3                                 |
| SNAP25   | 1.33 | 4.19 | ENSG00000132639 | synaptosome associated protein 25                                    |
| IFIH1    | 1.33 | 4.55 | ENSG00000115267 | interferon induced with helicase C domain 1                          |
| NPHP1    | 1.32 | 1.74 | ENSG00000144061 | nephrocystin 1                                                       |
| KYNU     | 1.32 | 1.94 | ENSG00000115919 | kynureninase                                                         |
| DUSP10   | 1.32 | 5.12 | ENSG00000143507 | dual specificity phosphatase 10                                      |
| ADAMTS10 | 1.31 | 2.91 | ENSG00000142303 | ADAM metalloproteinase with thrombospondin type 1 motif 10           |
| CEBPD    | 1.31 | 6.41 | ENSG00000221869 | CCAAT/enhancer binding protein delta                                 |
| RASSF4   | 1.31 | 5.71 | ENSG00000107551 | Ras association domain family member 4                               |
| NYNRIN   | 1.31 | 2.91 | ENSG00000205978 | NYN domain and retroviral integrase containing                       |
| ANO9     | 1.30 | 5.55 | ENSG00000185101 | anoctamin 9                                                          |
| ANG      | 1.30 | 1.07 | ENSG00000214274 | angiogenin                                                           |
| ALPK1    | 1.29 | 3.29 | ENSG00000073331 | alpha kinase 1                                                       |
| THBS3    | 1.29 | 3.00 | ENSG00000169231 | thrombospondin 3                                                     |
| OAS3     | 1.29 | 3.15 | ENSG00000111331 | 2'-5'-oligoadenylate synthetase 3                                    |
| GPR161   | 1.28 | 5.29 | ENSG00000143147 | G protein-coupled receptor 161                                       |
| TNIP1    | 1.27 | 6.66 | ENSG00000145901 | TNFAIP3 interacting protein 1                                        |
| TRIM50   | 1.27 | 2.65 | ENSG00000146755 | tripartite motif containing 50                                       |

|               |      |      |                 |                                                         |
|---------------|------|------|-----------------|---------------------------------------------------------|
| CSGALNACT1    | 1.27 | 3.59 | ENSG00000147408 | chondroitin sulfate N-acetylgalactosaminyltransferase 1 |
| EYA1          | 1.27 | 1.05 | ENSG00000104313 | EYA transcriptional coactivator and phosphatase 1       |
| FMO5          | 1.27 | 2.99 | ENSG00000131781 | flavin containing monooxygenase 5                       |
| LRRC27        | 1.26 | 1.30 | ENSG00000148814 | leucine rich repeat containing 27                       |
| PBXIP1        | 1.26 | 6.48 | ENSG00000163346 | PBX homeobox interacting protein 1                      |
| PTPRD         | 1.26 | 2.55 | ENSG00000282932 | protein tyrosine phosphatase, receptor type D           |
| RP1-257A7.4   | 1.25 | 1.50 | ENSG00000215022 | N/A                                                     |
| NFKBIA        | 1.25 | 7.72 | ENSG00000100906 | NFKB inhibitor alpha                                    |
| RP11-486A14.1 | 1.25 | 1.35 | ENSG00000257512 | N/A                                                     |
| STK39         | 1.25 | 6.21 | ENSG00000198648 | serine/threonine kinase 39                              |
| ZNF608        | 1.25 | 4.94 | ENSG00000168916 | zinc finger protein 608                                 |
| MSRB3         | 1.25 | 2.74 | ENSG00000174099 | methionine sulfoxide reductase B3                       |
| TAGLN         | 1.25 | 4.80 | ENSG00000149591 | transgelin                                              |
| TCTN2         | 1.25 | 4.35 | ENSG00000168778 | tectonic family member 2                                |
| TSPAN15       | 1.24 | 5.61 | ENSG00000099282 | tetraspanin 15                                          |
| CX3CL1        | 1.24 | 7.23 | ENSG00000006210 | C-X3-C motif chemokine ligand 1                         |
| ARHGEF40      | 1.24 | 5.43 | ENSG00000165801 | Rho guanine nucleotide exchange factor 40               |
| CDKN1A        | 1.24 | 2.44 | ENSG00000124762 | cyclin dependent kinase inhibitor 1A                    |
| PGM2L1        | 1.24 | 4.31 | ENSG00000165434 | phosphoglucomutase 2 like 1                             |
| TGFB2         | 1.23 | 7.47 | ENSG00000092969 | transforming growth factor beta 2                       |
| ZFP36L1       | 1.23 | 8.43 | ENSG00000185650 | ZFP36 ring finger protein like 1                        |
| AKT3          | 1.23 | 2.21 | ENSG00000117020 | AKT serine/threonine kinase 3                           |
| GPRC5B        | 1.22 | 7.74 | ENSG00000167191 | G protein-coupled receptor class C group 5 member B     |
| PKLR          | 1.22 | 1.15 | ENSG00000143627 | pyruvate kinase, liver and RBC                          |
| RARRES1       | 1.22 | 2.47 | ENSG00000118849 | retinoic acid receptor responder 1                      |
| SLC8B1        | 1.22 | 3.43 | ENSG00000089060 | solute carrier family 8 member B1                       |
| SH3BGRL       | 1.21 | 4.55 | ENSG00000131171 | SH3 domain binding glutamate rich protein like          |
| NPR1          | 1.21 | 1.43 | ENSG00000169418 | natriuretic peptide receptor 1                          |
| ETV6          | 1.21 | 4.67 | ENSG00000139083 | ETS variant 6                                           |
| RASSF5        | 1.21 | 3.49 | ENSG00000266094 | Ras association domain family member 5                  |

|             |      |      |                 |                                                              |
|-------------|------|------|-----------------|--------------------------------------------------------------|
| TMEM51      | 1.21 | 5.54 | ENSG00000171729 | transmembrane protein 51                                     |
| PTK2B       | 1.21 | 1.82 | ENSG00000120899 | protein tyrosine kinase 2 beta                               |
| GDNF        | 1.21 | 4.28 | ENSG00000168621 | glial cell derived neurotrophic factor                       |
| MYL9        | 1.21 | 4.85 | ENSG00000101335 | myosin light chain 9                                         |
| LRRC49      | 1.21 | 3.31 | ENSG00000137821 | leucine rich repeat containing 49                            |
| FAM102A     | 1.21 | 4.69 | ENSG00000167106 | family with sequence similarity 102 member A                 |
| LRRN1       | 1.20 | 4.86 | ENSG00000175928 | leucine rich repeat neuronal 1                               |
| SLC5A12     | 1.20 | 1.70 | ENSG00000148942 | solute carrier family 5 member 12                            |
| GABRA2      | 1.20 | 4.18 | ENSG00000151834 | gamma-aminobutyric acid type A receptor alpha2 subunit       |
| ITGA3       | 1.20 | 2.16 | ENSG00000005884 | integrin subunit alpha 3                                     |
| SEMA3G      | 1.20 | 3.65 | ENSG0000010319  | semaphorin 3G                                                |
| LINC00174   | 1.20 | 1.31 | ENSG00000179406 | long intergenic non-protein coding RNA 174                   |
| TNFRSF19    | 1.20 | 5.74 | ENSG00000127863 | TNF receptor superfamily member 19                           |
| GATA6       | 1.20 | 5.75 | ENSG00000141448 | GATA binding protein 6                                       |
| CTHRC1      | 1.20 | 5.33 | ENSG00000164932 | collagen triple helix repeat containing 1                    |
| SEMA6A      | 1.20 | 6.01 | ENSG00000092421 | semaphorin 6A                                                |
| GPR176      | 1.19 | 3.02 | ENSG00000166073 | G protein-coupled receptor 176                               |
| C10orf11    | 1.19 | 2.38 | ENSG00000148655 | chromosome 10 open reading frame 11                          |
| IFITM3      | 1.19 | 8.46 | ENSG00000142089 | interferon induced transmembrane protein 3                   |
| BTG1        | 1.19 | 6.29 | ENSG00000133639 | BTG anti-proliferation factor 1                              |
| MR1         | 1.19 | 3.81 | ENSG00000153029 | major histocompatibility complex, class I-related            |
| EPDR1       | 1.19 | 4.57 | ENSG00000086289 | ependymin related 1                                          |
| CEACAM1     | 1.19 | 5.80 | ENSG00000079385 | carcinoembryonic antigen related cell adhesion molecule 1    |
| FAM214B     | 1.18 | 3.38 | ENSG00000005238 | family with sequence similarity 214 member B                 |
| BTN3A3      | 1.18 | 3.47 | ENSG00000111801 | butyrophilin subfamily 3 member A3                           |
| C6orf163    | 1.18 | 1.24 | ENSG00000203872 | chromosome 6 open reading frame 163                          |
| A4GALT      | 1.18 | 3.74 | ENSG00000128274 | alpha 1,4-galactosyltransferase                              |
| GS1-358P8.4 | 1.18 | 1.55 | ENSG00000260822 | N/A                                                          |
| DYRK3       | 1.18 | 1.30 | ENSG00000143479 | dual specificity tyrosine phosphorylation regulated kinase 3 |

|             |      |      |                 |                                                          |
|-------------|------|------|-----------------|----------------------------------------------------------|
| ADAMTS6     | 1.17 | 1.98 | ENSG00000049192 | ADAM metallopeptidase with thrombospondin type 1 motif 6 |
| ABR         | 1.17 | 6.73 | ENSG00000278741 | active BCR-related                                       |
| QRICH2      | 1.16 | 3.34 | ENSG00000129646 | glutamine rich 2                                         |
| NKD1        | 1.16 | 5.19 | ENSG00000140807 | naked cuticle homolog 1                                  |
| SPATA7      | 1.15 | 1.22 | ENSG00000042317 | spermatogenesis associated 7                             |
| NFIX        | 1.15 | 6.93 | ENSG00000008441 | nuclear factor I X                                       |
| DDR1        | 1.15 | 6.40 | ENSG00000230456 | discoidin domain receptor tyrosine kinase 1              |
| HUNK        | 1.15 | 4.93 | ENSG00000142149 | hormonally up-regulated Neu-associated kinase            |
| AKAP6       | 1.15 | 2.12 | ENSG00000151320 | A-kinase anchoring protein 6                             |
| COL9A3      | 1.14 | 7.73 | ENSG00000092758 | collagen type IX alpha 3 chain                           |
| SLC12A2     | 1.14 | 9.14 | ENSG00000064651 | solute carrier family 12 member 2                        |
| CCDC28B     | 1.14 | 3.59 | ENSG00000160050 | coiled-coil domain containing 28B                        |
| CXXC4       | 1.14 | 1.03 | ENSG00000168772 | CXXC finger protein 4                                    |
| MAPRE3      | 1.13 | 2.81 | ENSG00000084764 | microtubule associated protein RP/EB family member 3     |
| EHD3        | 1.13 | 2.17 | ENSG00000013016 | EH domain containing 3                                   |
| MSH5        | 1.13 | 1.21 | ENSG00000235569 | mutS homolog 5                                           |
| TBC1D32     | 1.12 | 2.44 | ENSG00000146350 | TBC1 domain family member 32                             |
| ZNF836      | 1.12 | 1.64 | ENSG00000196267 | zinc finger protein 836                                  |
| CYB5R2      | 1.12 | 1.68 | ENSG00000166394 | cytochrome b5 reductase 2                                |
| DKK3        | 1.12 | 3.50 | ENSG00000050165 | dickkopf WNT signaling pathway inhibitor 3               |
| TMEM45A     | 1.12 | 4.10 | ENSG00000181458 | transmembrane protein 45A                                |
| PGC         | 1.12 | 4.41 | ENSG00000096088 | progastricin                                             |
| CXCL5       | 1.12 | 9.37 | ENSG00000163735 | C-X-C motif chemokine ligand 5                           |
| TRIM31      | 1.12 | 2.36 | ENSG00000226402 | tripartite motif containing 31                           |
| RP9P        | 1.12 | 2.77 | ENSG00000205763 | retinitis pigmentosa 9 pseudogene                        |
| ABCA11P     | 1.12 | 1.36 | ENSG00000251595 | ATP binding cassette subfamily A member 11, pseudogene   |
| PRICKLE2    | 1.11 | 4.14 | ENSG00000163637 | prickle planar cell polarity protein 2                   |
| MORN4       | 1.11 | 1.46 | ENSG00000171160 | MORN repeat containing 4                                 |
| SYT12       | 1.11 | 3.31 | ENSG00000173227 | synaptotagmin 12                                         |
| RP11-38M8.1 | 1.10 | 1.01 | ENSG00000273297 | N/A                                                      |
| ZNF808      | 1.10 | 2.09 | ENSG00000198482 | zinc finger protein 808                                  |

|         |      |      |                 |                                                                            |
|---------|------|------|-----------------|----------------------------------------------------------------------------|
| SSBP3   | 1.10 | 6.33 | ENSG00000157216 | single stranded DNA binding protein 3                                      |
| OR211P  | 1.10 | 6.37 | ENSG00000231973 | olfactory receptor family 2 subfamily I member 1 pseudogene                |
| FREM1   | 1.10 | 1.19 | ENSG00000164946 | FRAS1 related extracellular matrix 1                                       |
| PCAT6   | 1.10 | 1.19 | ENSG00000228288 | prostate cancer associated transcript 6 (non-protein coding)               |
| ATP1A1  | 1.10 | 9.10 | ENSG00000163399 | ATPase Na <sup>+</sup> /K <sup>+</sup> transporting subunit alpha 1        |
| LGALS1  | 1.10 | 7.50 | ENSG00000100097 | galectin 1                                                                 |
| PCDHB10 | 1.09 | 1.24 | ENSG00000120324 | protocadherin beta 10                                                      |
| IGFBP3  | 1.09 | 7.98 | ENSG00000146674 | insulin like growth factor binding protein 3                               |
| RASL11B | 1.09 | 1.93 | ENSG00000128045 | RAS like family 11 member B                                                |
| SEMA6C  | 1.09 | 4.20 | ENSG00000143434 | semaphorin 6C                                                              |
| RFTN1   | 1.09 | 2.97 | ENSG00000131378 | raftlin, lipid raft linker 1                                               |
| ZNF391  | 1.09 | 3.20 | ENSG00000124613 | zinc finger protein 391                                                    |
| CKAP4   | 1.09 | 8.13 | ENSG00000136026 | cytoskeleton associated protein 4                                          |
| EMB     | 1.09 | 3.06 | ENSG00000170571 | embigin                                                                    |
| TMOD1   | 1.09 | 1.49 | ENSG00000136842 | tropomodulin 1                                                             |
| LITAF   | 1.08 | 6.37 | ENSG00000189067 | lipopolysaccharide induced TNF factor                                      |
| C2CD4C  | 1.08 | 2.17 | ENSG00000183186 | C2 calcium dependent domain containing 4C                                  |
| CCDC53  | 1.08 | 2.63 | ENSG00000120860 | coiled-coil domain containing 53                                           |
| SLC1A4  | 1.08 | 6.93 | ENSG00000115902 | solute carrier family 1 member 4                                           |
| SOCS2   | 1.08 | 2.30 | ENSG00000120833 | suppressor of cytokine signaling 2                                         |
| CYP1B1  | 1.08 | 1.74 | ENSG00000138061 | cytochrome P450 family 1 subfamily B member 1                              |
| CTSC    | 1.07 | 9.20 | ENSG00000109861 | cathepsin C                                                                |
| HLA-G   | 1.07 | 2.63 | ENSG00000235680 | major histocompatibility complex, class I, G                               |
| HERC6   | 1.07 | 1.05 | ENSG00000138642 | HECT and RLD domain containing E3 ubiquitin protein ligase family member 6 |
| TJP3    | 1.07 | 3.76 | ENSG00000105289 | tight junction protein 3                                                   |
| CBX6    | 1.07 | 6.42 | ENSG00000183741 | chromobox 6                                                                |
| PIK3CD  | 1.07 | 3.78 | ENSG00000171608 | phosphatidylinositol-4,5-bisphosphate 3-kinase catalytic subunit delta     |
| IL17RB  | 1.07 | 7.10 | ENSG00000056736 | interleukin 17 receptor B                                                  |

|               |      |      |                 |                                                                                  |
|---------------|------|------|-----------------|----------------------------------------------------------------------------------|
| RP11-244H3.1  | 1.07 | 1.17 | ENSG00000241014 | N/A                                                                              |
| NPIPP1        | 1.07 | 1.28 | ENSG00000188599 | nuclear pore complex interacting protein<br>pseudogene 1                         |
| RNF103        | 1.07 | 5.75 | ENSG00000239305 | ring finger protein 103                                                          |
| BTN2A2        | 1.06 | 4.92 | ENSG00000124508 | butyrophilin subfamily 2 member A2                                               |
| DLK1          | 1.06 | 3.08 | ENSG00000185559 | delta like non-canonical Notch ligand 1                                          |
| PRAME         | 1.06 | 1.43 | ENSG00000185686 | preferentially expressed antigen in<br>melanoma                                  |
| YJEFN3        | 1.06 | 1.43 | ENSG00000250067 | YjeF N-terminal domain containing 3                                              |
| C8orf48       | 1.06 | 1.47 | ENSG00000164743 | chromosome 8 open reading frame 48                                               |
| ENTPD2        | 1.06 | 3.34 | ENSG00000054179 | ectonucleoside triphosphate<br>diphosphohydrolase 2                              |
| ALPL          | 1.06 | 1.68 | ENSG00000162551 | alkaline phosphatase, liver/bone/kidney                                          |
| SAMD9         | 1.06 | 1.72 | ENSG00000205413 | sterile alpha motif domain containing 9                                          |
| PLEKHA4       | 1.06 | 4.30 | ENSG00000105559 | pleckstrin homology domain containing<br>A4                                      |
| FLRT2         | 1.06 | 7.88 | ENSG00000185070 | fibronectin leucine rich transmembrane<br>protein 2                              |
| MOB3B         | 1.05 | 4.29 | ENSG00000120162 | MOB kinase activator 3B                                                          |
| RP11-890B15.3 | 1.05 | 2.41 | ENSG00000255455 | N/A                                                                              |
| AGPAT4        | 1.05 | 2.79 | ENSG00000026652 | 1-acylglycerol-3-phosphate O-<br>acyltransferase 4                               |
| RAB13         | 1.05 | 4.60 | ENSG00000143545 | RAB13, member RAS oncogene family                                                |
| MBOAT1        | 1.05 | 3.04 | ENSG00000172197 | membrane bound O-acyltransferase<br>domain containing 1                          |
| LPAR6         | 1.04 | 2.72 | ENSG00000139679 | lysophosphatidic acid receptor 6                                                 |
| TP53TG1       | 1.04 | 2.58 | ENSG00000182165 | TP53 target 1 (non-protein coding)                                               |
| DMRTA1        | 1.04 | 2.23 | ENSG00000176399 | DMRT like family A1                                                              |
| IKBKE         | 1.04 | 5.89 | ENSG00000263528 | inhibitor of kappa light polypeptide gene<br>enhancer in B-cells, kinase epsilon |
| GRIK4         | 1.04 | 1.46 | ENSG00000149403 | glutamate ionotropic receptor kainate<br>type subunit 4                          |
| MAP3K7CL      | 1.04 | 1.46 | ENSG00000156265 | MAP3K7 C-terminal like                                                           |
| HNRNPCP1      | 1.04 | 1.41 | ENSG00000258900 | heterogeneous nuclear ribonucleoprotein<br>C pseudogene 1                        |
| CCDC157       | 1.04 | 1.21 | ENSG00000187860 | coiled-coil domain containing 157                                                |
| BTN3A1        | 1.04 | 4.91 | ENSG00000026950 | butyrophilin subfamily 3 member A1                                               |



|               |      |      |                 |                                                             |
|---------------|------|------|-----------------|-------------------------------------------------------------|
| NUDT4         | 1.04 | 6.59 | ENSG00000173598 | nudix hydrolase 4                                           |
| ZSWIM4        | 1.03 | 4.92 | ENSG00000132003 | zinc finger SWIM-type containing 4                          |
| STAT1         | 1.03 | 7.83 | ENSG00000115415 | signal transducer and activator of transcription 1          |
| TM4SF4        | 1.03 | 8.01 | ENSG00000169903 | transmembrane 4 L six family member 4                       |
| ELK3          | 1.03 | 4.92 | ENSG00000111145 | ELK3, ETS transcription factor                              |
| DSE           | 1.03 | 7.10 | ENSG00000111817 | dermatan sulfate epimerase                                  |
| ZNF287        | 1.02 | 2.01 | ENSG00000141040 | zinc finger protein 287                                     |
| TMEM86A       | 1.02 | 1.88 | ENSG00000151117 | transmembrane protein 86A                                   |
| RP11-448G15.3 | 1.02 | 1.77 | ENSG00000261490 | N/A                                                         |
| RTN2          | 1.02 | 3.77 | ENSG00000125744 | reticulon 2                                                 |
| APBA1         | 1.02 | 3.06 | ENSG00000276497 | amyloid beta precursor protein binding family A member 1    |
| EFCAB12       | 1.02 | 1.62 | ENSG00000172771 | EF-hand calcium binding domain 12                           |
| CTD-2545H1.2  | 1.02 | 1.49 | ENSG00000262445 | N/A                                                         |
| SYT1          | 1.01 | 1.44 | ENSG00000067715 | synaptotagmin 1                                             |
| BIRC2         | 1.01 | 6.72 | ENSG00000110330 | baculoviral IAP repeat containing 2                         |
| C7orf31       | 1.01 | 4.64 | ENSG00000153790 | chromosome 7 open reading frame 31                          |
| ZNF214        | 1.01 | 1.39 | ENSG00000149050 | zinc finger protein 214                                     |
| RP11-101E13.5 | 1.01 | 3.16 | ENSG00000272579 | N/A                                                         |
| SGCB          | 1.01 | 4.85 | ENSG00000163069 | sarcoglycan beta                                            |
| AC007228.9    | 1.01 | 1.24 | ENSG00000268568 | N/A                                                         |
| FZD6          | 1.01 | 4.56 | ENSG00000164930 | frizzled class receptor 6                                   |
| UGT2B7        | 1.01 | 4.39 | ENSG00000171234 | UDP glucuronosyltransferase family 2 member B7              |
| CD83          | 1.01 | 4.84 | ENSG00000112149 | CD83 molecule                                               |
| RGMB-AS1      | 1.01 | 1.07 | ENSG00000246763 | RGMB antisense RNA 1                                        |
| DGKA          | 1.00 | 3.61 | ENSG00000065357 | diacylglycerol kinase alpha                                 |
| ST6GALNAC3    | 1.00 | 1.01 | ENSG00000184005 | ST6 N-acetylgalactosaminide alpha-2,6-sialyltransferase 3   |
| SLFN5         | 1.00 | 5.05 | ENSG00000166750 | schlafen family member 5                                    |
| RP11-4O1.2    | 1.00 | 2.38 | ENSG00000259953 | N/A                                                         |
| LRRC1         | 1.00 | 5.98 | ENSG00000137269 | leucine rich repeat containing 1                            |
| S100A6        | 1.00 | 5.57 | ENSG00000197956 | S100 calcium binding protein A6                             |
| GDPD5         | 1.00 | 4.07 | ENSG00000158555 | glycerophosphodiester phosphodiesterase domain containing 5 |
| TFAP2A        | 1.00 | 6.57 | ENSG00000137203 | transcription factor AP-2 alpha                             |

|          |      |      |                 |                                                            |
|----------|------|------|-----------------|------------------------------------------------------------|
| DAPK2    | 1.00 | 2.25 | ENSG00000035664 | death associated protein kinase 2                          |
| SLC37A1  | 1.00 | 4.72 | ENSG00000160190 | solute carrier family 37 member 1                          |
| MYH3     | 1.00 | 3.08 | ENSG00000109063 | myosin heavy chain 3                                       |
| FBXO36   | 0.99 | 2.08 | ENSG00000153832 | F-box protein 36                                           |
| FAM229B  | 0.99 | 2.47 | ENSG00000203778 | family with sequence similarity 229 member B               |
| KCTD1    | 0.99 | 3.02 | ENSG00000134504 | potassium channel tetramerization domain containing 1      |
| CASC15   | 0.99 | 2.44 | ENSG00000272168 | cancer susceptibility candidate 15 (non-protein coding)    |
| GOLM1    | 0.99 | 3.33 | ENSG00000135052 | golgi membrane protein 1                                   |
| S100A4   | 0.99 | 1.43 | ENSG00000196154 | S100 calcium binding protein A4                            |
| VNN2     | 0.99 | 3.45 | ENSG00000112303 | vanin 2                                                    |
| NBPF20   | 0.99 | 1.93 | ENSG00000162825 | neuroblastoma breakpoint family member 20                  |
| PDK2     | 0.99 | 3.84 | ENSG00000005882 | pyruvate dehydrogenase kinase 2                            |
| HPSE     | 0.99 | 2.59 | ENSG00000173083 | heparanase                                                 |
| LURAP1L  | 0.99 | 3.54 | ENSG00000153714 | leucine rich adaptor protein 1 like                        |
| CEACAM19 | 0.99 | 1.33 | ENSG00000186567 | carcinoembryonic antigen related cell adhesion molecule 19 |
| LMLN     | 0.99 | 3.00 | ENSG00000185621 | leishmanolysin like peptidase                              |
| BTN3A2   | 0.98 | 4.73 | ENSG00000186470 | butyrophilin subfamily 3 member A2                         |
| CNTNAP1  | 0.98 | 4.77 | ENSG00000108797 | contactin associated protein 1                             |
| IRF5     | 0.98 | 1.22 | ENSG00000128604 | interferon regulatory factor 5                             |
| UGT3A2   | 0.98 | 3.53 | ENSG00000168671 | UDP glycosyltransferase family 3 member A2                 |
| LMCD1    | 0.98 | 5.25 | ENSG00000071282 | LIM and cysteine rich domains 1                            |
| BCL2L11  | 0.98 | 5.40 | ENSG00000153094 | BCL2 like 11                                               |
| VRK2     | 0.98 | 5.87 | ENSG00000028116 | vaccinia related kinase 2                                  |
| MPPED2   | 0.98 | 3.18 | ENSG00000066382 | metallophosphoesterase domain containing 2                 |
| NUCB2    | 0.98 | 5.00 | ENSG00000070081 | nucleobindin 2                                             |
| PSENEN   | 0.98 | 5.18 | ENSG00000205155 | presenilin enhancer gamma-secretase subunit                |
| GATS     | 0.97 | 3.08 | ENSG00000239521 | GATS, stromal antigen 3 opposite strand                    |
| GFRA3    | 0.97 | 1.95 | ENSG00000146013 | GDNF family receptor alpha 3                               |
| SQRDL    | 0.97 | 3.79 | ENSG00000137767 | sulfide quinone reductase-like (yeast)                     |

|               |      |      |                 |                                              |
|---------------|------|------|-----------------|----------------------------------------------|
| C8orf49       | 0.97 | 1.55 | ENSG00000255394 | chromosome 8 open reading frame 49           |
| ZSWIM5        | 0.97 | 3.68 | ENSG00000162415 | zinc finger SWIM-type containing 5           |
| RP11-278L15.6 | 0.97 | 1.85 | ENSG00000244503 | N/A                                          |
| RRAS          | 0.97 | 4.62 | ENSG00000126458 | related RAS viral (r-ras) oncogene homolog   |
| SERPINE2      | 0.97 | 5.98 | ENSG00000135919 | serpin family E member 2                     |
| PARP14        | 0.97 | 4.94 | ENSG00000173193 | poly(ADP-ribose) polymerase family member 14 |
| MPP1          | 0.97 | 3.74 | ENSG00000130830 | membrane palmitoylated protein 1             |
| C14orf105     | 0.97 | 3.97 | ENSG00000100557 | chromosome 14 open reading frame 105         |
| SLC18B1       | 0.96 | 6.94 | ENSG00000146409 | solute carrier family 18 member B1           |
| FAM89B        | 0.96 | 4.75 | ENSG00000176973 | family with sequence similarity 89 member B  |
| RTN4RL1       | 0.96 | 4.51 | ENSG00000185924 | reticulon 4 receptor like 1                  |
| HAS3          | 0.96 | 2.28 | ENSG00000103044 | hyaluronan synthase 3                        |
| ACSF2         | 0.96 | 3.97 | ENSG00000167107 | acyl-CoA synthetase family member 2          |
| RP11-403I13.8 | 0.96 | 2.96 | ENSG00000272419 | N/A                                          |
| RP11-479G22.8 | 0.96 | 1.70 | ENSG00000273038 | N/A                                          |
| NCEH1         | 0.96 | 6.36 | ENSG00000144959 | neutral cholesterol ester hydrolase 1        |
| CTSF          | 0.96 | 3.68 | ENSG00000174080 | cathepsin F                                  |
| NFE2L3        | 0.96 | 6.99 | ENSG00000050344 | nuclear factor, erythroid 2 like 3           |
| LIMCH1        | 0.96 | 4.72 | ENSG00000064042 | LIM and calponin homology domains 1          |
| ARHGAP40      | 0.96 | 2.74 | ENSG00000124143 | Rho GTPase activating protein 40             |
| FAXC          | 0.95 | 3.99 | ENSG00000146267 | failed axon connections homolog              |
| CBWD5         | 0.95 | 1.21 | ENSG00000147996 | COBW domain containing 5                     |
| RAB42         | 0.95 | 1.21 | ENSG00000188060 | RAB42, member RAS oncogene family            |
| RP11-5C23.1   | 0.95 | 1.21 | ENSG00000272760 | N/A                                          |
| C11orf49      | 0.95 | 5.63 | ENSG00000149179 | chromosome 11 open reading frame 49          |
| CCL15         | 0.95 | 1.57 | ENSG00000275718 | C-C motif chemokine ligand 15                |
| TLR3          | 0.95 | 1.57 | ENSG00000164342 | toll like receptor 3                         |
| NEBL          | 0.95 | 2.94 | ENSG00000078114 | nebulette                                    |
| RP11-977G19.5 | 0.95 | 1.53 | ENSG00000258199 | N/A                                          |
| CROT          | 0.95 | 3.27 | ENSG00000005469 | carnitine O-octanoyltransferase              |
| FNDC4         | 0.95 | 2.91 | ENSG00000115226 | fibronectin type III domain containing 4     |
| ARL3          | 0.95 | 3.89 | ENSG00000138175 | ADP ribosylation factor like GTPase 3        |
| SLC30A3       | 0.95 | 2.62 | ENSG00000115194 | solute carrier family 30 member 3            |
| METTL7A       | 0.95 | 3.24 | ENSG00000185432 | methyltransferase like 7A                    |

|               |      |      |                 |                                                      |
|---------------|------|------|-----------------|------------------------------------------------------|
| PHLDA1        | 0.94 | 7.82 | ENSG00000139289 | pleckstrin homology like domain family<br>A member 1 |
| SNX10         | 0.94 | 4.54 | ENSG00000086300 | sorting nexin 10                                     |
| VAMP2         | 0.94 | 4.60 | ENSG00000220205 | vesicle associated membrane protein 2                |
| SERPINA10     | 0.94 | 3.03 | ENSG00000278767 | serpin family A member 10                            |
| TRAM2-AS1     | 0.94 | 1.39 | ENSG00000225791 | TRAM2 antisense RNA 1 (head to head)                 |
| TUBB3         | 0.94 | 7.00 | ENSG00000258947 | tubulin beta 3 class III                             |
| HMSD          | 0.94 | 2.64 | ENSG00000221887 | histocompatibility minor serpin domain<br>containing |
| TRIM52-AS1    | 0.94 | 2.47 | ENSG00000248275 | TRIM52 antisense RNA 1 (head to head)                |
| NFKB2         | 0.94 | 6.72 | ENSG00000077150 | nuclear factor kappa B subunit 2                     |
| MFAP2         | 0.93 | 7.07 | ENSG00000117122 | microfibrillar associated protein 2                  |
| SLC41A2       | 0.93 | 3.32 | ENSG00000136052 | solute carrier family 41 member 2                    |
| NRP2          | 0.93 | 3.11 | ENSG00000118257 | neuropilin 2                                         |
| UBD           | 0.93 | 2.53 | ENSG00000224654 | ubiquitin D                                          |
| CDC42EP4      | 0.93 | 8.07 | ENSG00000179604 | CDC42 effector protein 4                             |
| PBX3          | 0.93 | 3.50 | ENSG00000167081 | PBX homeobox 3                                       |
| FCHSD1        | 0.93 | 3.27 | ENSG00000197948 | FCH and double SH3 domains 1                         |
| FHDC1         | 0.93 | 4.99 | ENSG00000137460 | FH2 domain containing 1                              |
| GJC1          | 0.93 | 7.56 | ENSG00000182963 | gap junction protein gamma 1                         |
| RASSF6        | 0.93 | 1.24 | ENSG00000169435 | Ras association domain family member<br>6            |
| ZNF582-AS1    | 0.93 | 1.24 | ENSG00000267454 | ZNF582 antisense RNA 1 (head to head)                |
| CRIP1         | 0.93 | 2.47 | ENSG00000213145 | cysteine rich protein 1                              |
| NBL1          | 0.92 | 2.59 | ENSG00000158747 | neuroblastoma 1, DAN family BMP<br>antagonist        |
| SP100         | 0.92 | 4.72 | ENSG00000067066 | SP100 nuclear antigen                                |
| CD58          | 0.92 | 3.47 | ENSG00000116815 | CD58 molecule                                        |
| FAM114A1      | 0.92 | 5.40 | ENSG00000197712 | family with sequence similarity 114<br>member A1     |
| DNAH5         | 0.92 | 1.91 | ENSG00000039139 | dynein axonemal heavy chain 5                        |
| RP11-418J17.1 | 0.92 | 2.09 | ENSG00000231365 | N/A                                                  |
| GARNL3        | 0.92 | 2.64 | ENSG00000136895 | GTPase activating Rap/RanGAP domain<br>like 3        |
| RP11-465N4.5  | 0.92 | 1.13 | ENSG00000273478 | N/A                                                  |
| KIF3C         | 0.92 | 4.97 | ENSG00000084731 | kinesin family member 3C                             |
| CD74          | 0.92 | 5.80 | ENSG00000019582 | CD74 molecule                                        |

|               |      |      |                 |                                                                |
|---------------|------|------|-----------------|----------------------------------------------------------------|
| BBS12         | 0.91 | 1.38 | ENSG00000181004 | Bardet-Biedl syndrome 12                                       |
| HNF1A-AS1     | 0.91 | 1.07 | ENSG00000241388 | HNF1A antisense RNA 1                                          |
| RNF24         | 0.91 | 4.84 | ENSG00000101236 | ring finger protein 24                                         |
| HNF1B         | 0.91 | 7.22 | ENSG00000275410 | HNF1 homeobox B                                                |
| PINK1-AS      | 0.91 | 3.12 | ENSG00000117242 | PINK1 antisense RNA                                            |
| MARK1         | 0.91 | 3.51 | ENSG00000116141 | microtubule affinity regulating kinase 1                       |
| CDK19         | 0.91 | 6.52 | ENSG00000155111 | cyclin dependent kinase 19                                     |
| HERPUD2       | 0.91 | 5.61 | ENSG00000122557 | HERPUD family member 2                                         |
| RRAGC         | 0.91 | 4.74 | ENSG00000116954 | Ras related GTP binding C                                      |
| RP11-498C9.15 | 0.91 | 1.77 | ENSG00000263731 | N/A                                                            |
| LARP6         | 0.91 | 4.26 | ENSG00000166173 | La ribonucleoprotein domain family member 6                    |
| MAFB          | 0.91 | 1.01 | ENSG00000204103 | MAF bZIP transcription factor B                                |
| DCAF6         | 0.91 | 7.43 | ENSG00000143164 | DDB1 and CUL4 associated factor 6                              |
| BTBD9         | 0.91 | 3.98 | ENSG00000183826 | BTB domain containing 9                                        |
| TMEM25        | 0.91 | 3.15 | ENSG00000149582 | transmembrane protein 25                                       |
| RNF19A        | 0.91 | 6.51 | ENSG00000034677 | ring finger protein 19A, RBR E3 ubiquitin protein ligase       |
| CD47          | 0.91 | 6.28 | ENSG00000196776 | CD47 molecule                                                  |
| ERBB4         | 0.91 | 3.21 | ENSG00000178568 | erb-b2 receptor tyrosine kinase 4                              |
| FOXQ1         | 0.90 | 4.93 | ENSG00000164379 | forkhead box Q1                                                |
| TRIM69        | 0.90 | 4.15 | ENSG00000278211 | tripartite motif containing 69                                 |
| CLVS1         | 0.90 | 2.22 | ENSG00000177182 | clavesin 1                                                     |
| CA5B          | 0.90 | 3.56 | ENSG00000169239 | carbonic anhydrase 5B                                          |
| SPATA13       | 0.90 | 5.98 | ENSG00000182957 | spermatogenesis associated 13                                  |
| TRIM59        | 0.90 | 2.45 | ENSG00000213186 | tripartite motif containing 59                                 |
| MICB          | 0.90 | 5.01 | ENSG00000231372 | MHC class I polypeptide-related sequence B                     |
| GABBR1        | 0.90 | 1.70 | ENSG00000237112 | gamma-aminobutyric acid type B receptor subunit 1              |
| CD99          | 0.90 | 6.80 | ENSG00000002586 | CD99 molecule                                                  |
| REEP2         | 0.90 | 1.46 | ENSG00000132563 | receptor accessory protein 2                                   |
| UACA          | 0.90 | 6.37 | ENSG00000137831 | uveal autoantigen with coiled-coil domains and ankyrin repeats |
| CYP27A1       | 0.90 | 5.73 | ENSG00000135929 | cytochrome P450 family 27 subfamily A member 1                 |
| SOBP          | 0.89 | 6.97 | ENSG00000112320 | sine oculis binding protein homolog                            |

|               |      |      |                 |                                                                    |
|---------------|------|------|-----------------|--------------------------------------------------------------------|
| PQLC3         | 0.89 | 2.26 | ENSG00000162976 | PQ loop repeat containing 3                                        |
| IER3          | 0.89 | 8.26 | ENSG00000230128 | immediate early response 3                                         |
| NOD1          | 0.89 | 1.41 | ENSG00000106100 | nucleotide binding oligomerization domain containing 1             |
| SNX22         | 0.89 | 3.27 | ENSG00000157734 | sorting nexin 22                                                   |
| SCPEP1        | 0.89 | 3.96 | ENSG00000121064 | serine carboxypeptidase 1                                          |
| LRRC46        | 0.89 | 1.36 | ENSG00000141294 | leucine rich repeat containing 46                                  |
| SLC34A2       | 0.89 | 4.02 | ENSG00000157765 | solute carrier family 34 member 2                                  |
| RAB36         | 0.89 | 1.11 | ENSG00000100228 | RAB36, member RAS oncogene family                                  |
| RP11-757F18.5 | 0.89 | 1.11 | ENSG00000261488 | N/A                                                                |
| DPYSL2        | 0.89 | 5.79 | ENSG00000092964 | dihydropyrimidinase like 2                                         |
| GPRASP1       | 0.89 | 2.18 | ENSG00000198932 | G protein-coupled receptor associated sorting protein 1            |
| PRLR          | 0.88 | 4.31 | ENSG00000113494 | prolactin receptor                                                 |
| MORN2         | 0.88 | 2.28 | ENSG00000188010 | MORN repeat containing 2                                           |
| PLA2G4C       | 0.88 | 3.79 | ENSG00000105499 | phospholipase A2 group IVC                                         |
| IGIP          | 0.88 | 1.31 | ENSG00000182700 | IgA inducing protein                                               |
| COLGALT2      | 0.88 | 2.37 | ENSG00000198756 | collagen beta(1-O)galactosyltransferase 2                          |
| VMAC          | 0.88 | 2.97 | ENSG00000187650 | vimentin-type intermediate filament associated coiled-coil protein |
| ADAP2         | 0.88 | 1.86 | ENSG00000184060 | ArfGAP with dual PH domains 2                                      |
| SLC11A2       | 0.88 | 6.17 | ENSG00000110911 | solute carrier family 11 member 2                                  |
| SSTR1         | 0.88 | 2.12 | ENSG00000139874 | somatostatin receptor 1                                            |
| ZNF577        | 0.88 | 2.73 | ENSG00000161551 | zinc finger protein 577                                            |
| SH3BP5-AS1    | 0.88 | 2.96 | ENSG00000224660 | SH3BP5 antisense RNA 1                                             |
| ZFHX2         | 0.88 | 5.33 | ENSG00000136367 | zinc finger homeobox 2                                             |
| PITPNC1       | 0.88 | 4.16 | ENSG00000154217 | phosphatidylinositol transfer protein, cytoplasmic 1               |
| TSPAN7        | 0.88 | 1.82 | ENSG00000156298 | tetraspanin 7                                                      |
| SRCIN1        | 0.88 | 4.45 | ENSG00000277363 | SRC kinase signaling inhibitor 1                                   |
| ARMC2         | 0.88 | 1.26 | ENSG00000118690 | armadillo repeat containing 2                                      |
| OAF           | 0.87 | 6.89 | ENSG00000184232 | out at first homolog                                               |
| RP11-159D12.2 | 0.87 | 4.88 | ENSG00000264112 | N/A                                                                |
| PRAP1         | 0.87 | 4.34 | ENSG00000165828 | proline rich acidic protein 1                                      |
| CA14          | 0.87 | 2.17 | ENSG00000118298 | carbonic anhydrase 14                                              |

|               |      |      |                 |                                                          |
|---------------|------|------|-----------------|----------------------------------------------------------|
| KCNIP4        | 0.87 | 2.27 | ENSG00000185774 | potassium voltage-gated channel interacting protein 4    |
| ISL1          | 0.87 | 3.35 | ENSG0000016082  | ISL LIM homeobox 1                                       |
| CFB           | 0.87 | 3.62 | ENSG00000243649 | complement factor B                                      |
| TESC          | 0.87 | 6.40 | ENSG00000088992 | tescalcin                                                |
| GKAP1         | 0.87 | 1.39 | ENSG00000165113 | G kinase anchoring protein 1                             |
| SPATA6        | 0.86 | 3.09 | ENSG00000132122 | spermatogenesis associated 6                             |
| RP11-283I3.6  | 0.86 | 3.35 | ENSG00000261799 | N/A                                                      |
| KRBA1         | 0.86 | 4.13 | ENSG00000133619 | KRAB-A domain containing 1                               |
| PARP10        | 0.86 | 1.71 | ENSG00000178685 | poly(ADP-ribose) polymerase family member 10             |
| SLC2A8        | 0.86 | 6.27 | ENSG00000136856 | solute carrier family 2 member 8                         |
| FUCA1         | 0.86 | 4.23 | ENSG00000179163 | fucosidase, alpha-L- 1, tissue                           |
| DCLK2         | 0.86 | 1.15 | ENSG00000170390 | doublecortin like kinase 2                               |
| RP11-452F19.3 | 0.86 | 2.31 | ENSG00000228106 | N/A                                                      |
| SORD          | 0.86 | 5.67 | ENSG00000140263 | sorbitol dehydrogenase                                   |
| CREB3L2       | 0.86 | 6.69 | ENSG00000182158 | cAMP responsive element binding protein 3 like 2         |
| APBB1         | 0.86 | 4.65 | ENSG00000166313 | amyloid beta precursor protein binding family B member 1 |
| HECA          | 0.86 | 3.68 | ENSG00000112406 | hdc homolog, cell cycle regulator                        |
| TMA7          | 0.86 | 2.49 | ENSG00000232112 | translation machinery associated 7 homolog               |
| STAT5A        | 0.86 | 3.75 | ENSG00000126561 | signal transducer and activator of transcription 5A      |
| LGALS3        | 0.86 | 3.17 | ENSG00000131981 | galectin 3                                               |
| POU6F1        | 0.86 | 2.19 | ENSG00000184271 | POU class 6 homeobox 1                                   |
| CD59          | 0.86 | 8.13 | ENSG00000085063 | CD59 molecule                                            |
| MYLIP         | 0.86 | 2.29 | ENSG00000007944 | myosin regulatory light chain interacting protein        |
| NDRG1         | 0.86 | 6.22 | ENSG00000104419 | N-myc downstream regulated 1                             |
| CREB3L3       | 0.86 | 1.67 | ENSG00000060566 | cAMP responsive element binding protein 3 like 3         |
| RP11-420L9.5  | 0.86 | 1.67 | ENSG00000270504 | N/A                                                      |
| RP11-755F10.1 | 0.86 | 1.67 | ENSG00000255320 | N/A                                                      |
| RP11-120K24.5 | 0.86 | 3.93 | ENSG00000269376 | N/A                                                      |

|            |      |      |                 |                                                            |
|------------|------|------|-----------------|------------------------------------------------------------|
| NDUFA13    | 0.86 | 3.79 | ENSG00000186010 | NADH:ubiquinone oxidoreductase subunit A13                 |
| GJB2       | 0.85 | 2.96 | ENSG00000165474 | gap junction protein beta 2                                |
| EFNB1      | 0.85 | 3.13 | ENSG00000090776 | ephrin B1                                                  |
| BGN        | 0.85 | 7.14 | ENSG00000182492 | biglycan                                                   |
| TBC1D19    | 0.85 | 2.88 | ENSG00000109680 | TBC1 domain family member 19                               |
| CAMK2N1    | 0.85 | 4.40 | ENSG00000162545 | calcium/calmodulin dependent protein kinase II inhibitor 1 |
| NRARP      | 0.85 | 4.13 | ENSG00000198435 | NOTCH-regulated ankyrin repeat protein                     |
| CLEC16A    | 0.85 | 6.49 | ENSG00000038532 | C-type lectin domain family 16 member A                    |
| YPEL3      | 0.85 | 5.52 | ENSG00000090238 | yippee like 3                                              |
| RERE       | 0.85 | 8.16 | ENSG00000142599 | arginine-glutamic acid dipeptide repeats                   |
| NEK11      | 0.85 | 2.21 | ENSG00000114670 | NIMA related kinase 11                                     |
| STX7       | 0.85 | 6.73 | ENSG00000079950 | syntaxin 7                                                 |
| SEMA3B     | 0.85 | 4.09 | ENSG00000012171 | semaphorin 3B                                              |
| AC009948.5 | 0.85 | 3.07 | ENSG00000223960 | N/A                                                        |
| BCL3       | 0.85 | 6.28 | ENSG00000069399 | B-cell CLL/lymphoma 3                                      |
| ZC2HC1A    | 0.84 | 3.20 | ENSG00000104427 | zinc finger C2HC-type containing 1A                        |
| ERAP1      | 0.84 | 5.34 | ENSG00000164307 | endoplasmic reticulum aminopeptidase 1                     |
| STPG1      | 0.84 | 2.79 | ENSG00000001460 | sperm tail PG-rich repeat containing 1                     |
| TRIM68     | 0.84 | 2.72 | ENSG00000167333 | tripartite motif containing 68                             |
| ATP9A      | 0.84 | 8.04 | ENSG00000054793 | ATPase phospholipid transporting 9A (putative)             |
| NAGA       | 0.84 | 5.32 | ENSG00000198951 | alpha-N-acetylgalactosaminidase                            |
| AGBL3      | 0.84 | 2.90 | ENSG00000146856 | ATP/GTP binding protein like 3                             |
| TGFB3      | 0.84 | 2.50 | ENSG00000119699 | transforming growth factor beta 3                          |
| ZNF57      | 0.84 | 2.50 | ENSG00000171970 | zinc finger protein 57                                     |
| SP110      | 0.84 | 4.07 | ENSG00000135899 | SP110 nuclear body protein                                 |
| HLA-H      | 0.84 | 2.12 | ENSG00000223463 | major histocompatibility complex, class I, H (pseudogene)  |
| ODF2L      | 0.84 | 4.59 | ENSG00000122417 | outer dense fiber of sperm tails 2 like                    |
| TOX        | 0.84 | 2.68 | ENSG00000198846 | thymocyte selection associated high mobility group box     |
| NTAN1      | 0.84 | 5.75 | ENSG00000275779 | N-terminal asparagine amidase                              |
| SPRY2      | 0.83 | 4.43 | ENSG00000136158 | sprouty RTK signaling antagonist 2                         |



|               |      |      |                 |                                                                  |
|---------------|------|------|-----------------|------------------------------------------------------------------|
| ACTRT3        | 0.83 | 3.03 | ENSG00000184378 | actin related protein T3                                         |
| ZNF416        | 0.83 | 3.03 | ENSG00000083817 | zinc finger protein 416                                          |
| PRDM4         | 0.83 | 5.76 | ENSG00000110851 | PR/SET domain 4                                                  |
| RIPPLY3       | 0.83 | 1.33 | ENSG00000183145 | rippy transcriptional repressor 3                                |
| LYPD6         | 0.83 | 4.73 | ENSG00000187123 | LY6/PLAUR domain containing 6                                    |
| ZNF135        | 0.83 | 4.85 | ENSG00000176293 | zinc finger protein 135                                          |
| SLC2A6        | 0.83 | 6.37 | ENSG00000281165 | solute carrier family 2 member 6                                 |
| SLC16A12      | 0.83 | 1.13 | ENSG00000152779 | solute carrier family 16 member 12                               |
| USP27X        | 0.83 | 1.13 | ENSG00000273820 | ubiquitin specific peptidase 27, X-linked                        |
| TRPV4         | 0.83 | 5.93 | ENSG00000111199 | transient receptor potential cation channel subfamily V member 4 |
| FAM174B       | 0.83 | 3.53 | ENSG00000185442 | family with sequence similarity 174 member B                     |
| IRF1          | 0.83 | 3.59 | ENSG00000125347 | interferon regulatory factor 1                                   |
| CALCOCO1      | 0.83 | 4.01 | ENSG00000012822 | calcium binding and coiled-coil domain 1                         |
| ZNF362        | 0.83 | 5.47 | ENSG00000160094 | zinc finger protein 362                                          |
| WDR60         | 0.83 | 2.93 | ENSG00000126870 | WD repeat domain 60                                              |
| OPTN          | 0.83 | 5.93 | ENSG00000123240 | optineurin                                                       |
| TESK2         | 0.82 | 1.57 | ENSG00000070759 | testis-specific kinase 2                                         |
| FMO1          | 0.82 | 3.25 | ENSG00000010932 | flavin containing monooxygenase 1                                |
| ROBO1         | 0.82 | 9.07 | ENSG00000169855 | roundabout guidance receptor 1                                   |
| DUSP1         | 0.82 | 6.52 | ENSG00000120129 | dual specificity phosphatase 1                                   |
| SERPINA6      | 0.82 | 5.88 | ENSG00000170099 | serpin family A member 6                                         |
| ELF3          | 0.82 | 7.00 | ENSG00000163435 | E74 like ETS transcription factor 3                              |
| SLC6A16       | 0.82 | 2.85 | ENSG00000063127 | solute carrier family 6 member 16                                |
| CP            | 0.82 | 7.48 | ENSG00000047457 | ceruloplasmin                                                    |
| PLXNA2        | 0.82 | 4.35 | ENSG00000076356 | plexin A2                                                        |
| RP11-1148L6.5 | 0.82 | 1.41 | ENSG00000228343 | N/A                                                              |
| PTGFRN        | 0.82 | 6.44 | ENSG00000134247 | prostaglandin F2 receptor inhibitor                              |
| RELB          | 0.82 | 5.86 | ENSG00000104856 | RELB proto-oncogene, NF-kB subunit                               |
| PKIG          | 0.82 | 3.62 | ENSG00000168734 | protein kinase (cAMP-dependent, catalytic) inhibitor gamma       |
| KLF6          | 0.82 | 8.15 | ENSG00000067082 | Kruppel like factor 6                                            |
| C16orf62      | 0.82 | 1.78 | ENSG00000103544 | chromosome 16 open reading frame 62                              |
| CYB5RL        | 0.82 | 1.78 | ENSG00000215883 | cytochrome b5 reductase like                                     |
| RP11-34P13.15 | 0.82 | 1.53 | ENSG00000268903 | N/A                                                              |

|               |      |      |                 |                                                  |
|---------------|------|------|-----------------|--------------------------------------------------|
| CTC-559E9.5   | 0.82 | 1.22 | ENSG00000267481 | N/A                                              |
| TTC30A        | 0.82 | 2.08 | ENSG00000197557 | tetratricopeptide repeat domain 30A              |
| SLC38A11      | 0.82 | 2.74 | ENSG00000169507 | solute carrier family 38 member 11               |
| RHPN2         | 0.82 | 5.97 | ENSG00000131941 | rhopilin Rho GTPase binding protein 2            |
| H1F0          | 0.81 | 8.43 | ENSG00000189060 | H1 histone family member 0                       |
| KIF1A         | 0.81 | 2.16 | ENSG00000130294 | kinesin family member 1A                         |
| STK17B        | 0.81 | 3.55 | ENSG00000081320 | serine/threonine kinase 17b                      |
| ACSL1         | 0.81 | 5.91 | ENSG00000151726 | acyl-CoA synthetase long-chain family member 1   |
| PHF21A        | 0.81 | 6.06 | ENSG00000135365 | PHD finger protein 21A                           |
| TTL7          | 0.81 | 3.87 | ENSG00000137941 | tubulin tyrosine ligase like 7                   |
| FUT8          | 0.81 | 2.60 | ENSG00000033170 | fucosyltransferase 8                             |
| FZD2          | 0.81 | 4.84 | ENSG00000180340 | frizzled class receptor 2                        |
| PXDC1         | 0.81 | 5.13 | ENSG00000168994 | PX domain containing 1                           |
| MNS1          | 0.81 | 2.65 | ENSG00000138587 | meiosis specific nuclear structural 1            |
| FBN2          | 0.81 | 7.25 | ENSG00000138829 | fibrillin 2                                      |
| TIMP2         | 0.81 | 6.84 | ENSG00000035862 | TIMP metalloproteinase inhibitor 2               |
| TLDC1         | 0.81 | 2.57 | ENSG00000140950 | TBC/LysM-associated domain containing 1          |
| RP11-706C16.7 | 0.81 | 1.60 | ENSG00000253196 | N/A                                              |
| OSER1-AS1     | 0.81 | 2.63 | ENSG00000223891 | OSER1 antisense RNA 1 (head to head)             |
| AF131215.9    | 0.81 | 2.49 | ENSG00000269918 | N/A                                              |
| IL22RA1       | 0.81 | 3.54 | ENSG00000142677 | interleukin 22 receptor subunit alpha 1          |
| ARMC9         | 0.81 | 2.90 | ENSG00000135931 | armadillo repeat containing 9                    |
| FAR2          | 0.81 | 1.71 | ENSG00000064763 | fatty acyl-CoA reductase 2                       |
| GSTM2         | 0.80 | 2.10 | ENSG00000213366 | glutathione S-transferase mu 2                   |
| LINC00641     | 0.80 | 4.63 | ENSG00000258441 | long intergenic non-protein coding RNA 641       |
| ZIK1          | 0.80 | 4.09 | ENSG00000171649 | zinc finger protein interacting with K protein 1 |
| RP11-218M22.1 | 0.80 | 1.81 | ENSG00000177406 | N/A                                              |
| ZNF883        | 0.80 | 3.76 | ENSG00000228623 | zinc finger protein 883                          |
| ZDHHC8        | 0.80 | 3.35 | ENSG00000099904 | zinc finger DHHC-type containing 8               |
| DAZAP2        | 0.80 | 7.22 | ENSG00000183283 | DAZ associated protein 2                         |
| CYSTM1        | 0.80 | 6.11 | ENSG00000120306 | cysteine rich transmembrane module containing 1  |

|              |      |      |                 |                                                             |
|--------------|------|------|-----------------|-------------------------------------------------------------|
| PTGDS        | 0.80 | 3.07 | ENSG00000107317 | prostaglandin D2 synthase                                   |
| SORBS2       | 0.80 | 4.19 | ENSG00000154556 | sorbin and SH3 domain containing 2                          |
| SFR1         | 0.80 | 1.99 | ENSG00000156384 | SWI5 dependent homologous recombination repair protein 1    |
| CDK18        | 0.80 | 4.32 | ENSG00000117266 | cyclin dependent kinase 18                                  |
| EFNA1        | 0.80 | 6.13 | ENSG00000169242 | ephrin A1                                                   |
| ICOSLG       | 0.80 | 4.32 | ENSG00000160223 | inducible T-cell costimulator ligand                        |
| ZNF703       | 0.80 | 5.17 | ENSG00000183779 | zinc finger protein 703                                     |
| METTL25      | 0.79 | 2.43 | ENSG00000127720 | methyltransferase like 25                                   |
| ERN1         | 0.79 | 4.98 | ENSG00000178607 | endoplasmic reticulum to nucleus signaling 1                |
| CLCF1        | 0.79 | 4.05 | ENSG00000175505 | cardiotrophin-like cytokine factor 1                        |
| AMZ2         | 0.79 | 5.26 | ENSG00000196704 | archaelysin family metallopeptidase 2                       |
| HDX          | 0.79 | 2.96 | ENSG00000165259 | highly divergent homeobox                                   |
| TNFSF9       | 0.79 | 2.66 | ENSG00000125657 | tumor necrosis factor superfamily member 9                  |
| IL1R1        | 0.79 | 5.06 | ENSG00000115594 | interleukin 1 receptor type 1                               |
| PAQR7        | 0.79 | 2.76 | ENSG00000182749 | progesterin and adipoQ receptor family member 7             |
| ETV1         | 0.79 | 4.84 | ENSG00000006468 | ETS variant 1                                               |
| BBS9         | 0.79 | 3.66 | ENSG00000122507 | Bardet-Biedl syndrome 9                                     |
| BRE          | 0.79 | 4.52 | ENSG00000158019 | brain and reproductive organ-expressed (TNFRSF1A modulator) |
| NBR1         | 0.79 | 6.69 | ENSG00000188554 | NBR1, autophagy cargo receptor                              |
| LRRC8C       | 0.79 | 2.99 | ENSG00000171488 | leucine rich repeat containing 8 family member C            |
| DLX4         | 0.79 | 1.92 | ENSG00000108813 | distal-less homeobox 4                                      |
| RP11-395I6.3 | 0.79 | 1.92 | ENSG00000260296 | N/A                                                         |
| HTATSF1      | 0.79 | 5.84 | ENSG00000102241 | HIV-1 Tat specific factor 1                                 |
| FGFR1        | 0.79 | 6.10 | ENSG00000077782 | fibroblast growth factor receptor 1                         |
| COMMD6       | 0.79 | 2.93 | ENSG00000188243 | COMM domain containing 6                                    |
| SORBS1       | 0.79 | 5.96 | ENSG00000095637 | sorbin and SH3 domain containing 1                          |
| TFPI         | 0.79 | 6.10 | ENSG00000003436 | tissue factor pathway inhibitor                             |
| PLEK2        | 0.79 | 3.66 | ENSG00000100558 | pleckstrin 2                                                |
| MAPK8        | 0.79 | 4.89 | ENSG00000107643 | mitogen-activated protein kinase 8                          |
| PANX2        | 0.79 | 3.25 | ENSG00000073150 | pannexin 2                                                  |
| BNIP3L       | 0.79 | 4.62 | ENSG00000104765 | BCL2 interacting protein 3 like                             |

|              |      |      |                 |                                                                    |
|--------------|------|------|-----------------|--------------------------------------------------------------------|
| CREB3L4      | 0.78 | 3.54 | ENSG00000143578 | cAMP responsive element binding protein 3 like 4                   |
| METTL24      | 0.78 | 1.70 | ENSG00000053328 | methyltransferase like 24                                          |
| HOMER2       | 0.78 | 5.70 | ENSG00000103942 | homer scaffolding protein 2                                        |
| SH3RF2       | 0.78 | 2.60 | ENSG00000156463 | SH3 domain containing ring finger 2                                |
| MAOB         | 0.78 | 7.18 | ENSG00000069535 | monoamine oxidase B                                                |
| KIAA1217     | 0.78 | 5.40 | ENSG00000120549 | KIAA1217                                                           |
| VAV3         | 0.78 | 5.47 | ENSG00000134215 | vav guanine nucleotide exchange factor 3                           |
| SYNGAP1      | 0.78 | 4.16 | ENSG00000227460 | synaptic Ras GTPase activating protein 1                           |
| FLVCR2       | 0.78 | 3.53 | ENSG00000119686 | feline leukemia virus subgroup C cellular receptor family member 2 |
| RP11-67L2.2  | 0.78 | 2.19 | ENSG00000273033 | N/A                                                                |
| PIGZ         | 0.78 | 4.13 | ENSG00000119227 | phosphatidylinositol glycan anchor biosynthesis class Z            |
| RP11-50C13.1 | 0.78 | 1.66 | ENSG00000259250 | N/A                                                                |
| TMSB10P1     | 0.78 | 1.66 | ENSG00000228499 | thymosin beta 10 pseudogene 1                                      |
| TRIM45       | 0.78 | 3.58 | ENSG00000134253 | tripartite motif containing 45                                     |
| ZER1         | 0.78 | 5.40 | ENSG00000160445 | zyg-11 related cell cycle regulator                                |
| ZNF233       | 0.78 | 2.91 | ENSG00000159915 | zinc finger protein 233                                            |
| ZNF486       | 0.77 | 3.51 | ENSG00000256229 | zinc finger protein 486                                            |
| PPP1R15A     | 0.77 | 6.79 | ENSG00000087074 | protein phosphatase 1 regulatory subunit 15A                       |
| TGIF1        | 0.77 | 5.70 | ENSG00000177426 | TGFB induced factor homeobox 1                                     |
| ZNF204P      | 0.77 | 2.30 | ENSG00000204789 | zinc finger protein 204, pseudogene                                |
| CTSL         | 0.77 | 4.26 | ENSG00000135047 | cathepsin L                                                        |
| TCF7L1       | 0.77 | 7.16 | ENSG00000152284 | transcription factor 7 like 1                                      |
| ITGA2        | 0.77 | 5.92 | ENSG00000164171 | integrin subunit alpha 2                                           |
| CERS5        | 0.77 | 4.42 | ENSG00000139624 | ceramide synthase 5                                                |
| GLB1L        | 0.77 | 1.62 | ENSG00000163521 | galactosidase beta 1 like                                          |
| TMCO4        | 0.77 | 3.33 | ENSG00000162542 | transmembrane and coiled-coil domains 4                            |
| IQCG         | 0.77 | 2.41 | ENSG00000114473 | IQ motif containing G                                              |
| PLOD1        | 0.77 | 7.87 | ENSG00000083444 | procollagen-lysine,2-oxoglutarate 5-dioxygenase 1                  |
| CRYL1        | 0.77 | 2.87 | ENSG00000165475 | crystallin lambda 1                                                |

|               |      |      |                 |                                                                       |
|---------------|------|------|-----------------|-----------------------------------------------------------------------|
| SMAD3         | 0.77 | 6.91 | ENSG00000166949 | SMAD family member 3                                                  |
| DAB2IP        | 0.77 | 7.03 | ENSG00000136848 | DAB2 interacting protein                                              |
| NUAK1         | 0.77 | 6.24 | ENSG00000074590 | NUAK family kinase 1                                                  |
| SYTL4         | 0.77 | 3.28 | ENSG00000102362 | synaptotagmin like 4                                                  |
| RP11-120K24.4 | 0.76 | 1.09 | ENSG00000269356 | N/A                                                                   |
| JUN           | 0.76 | 7.38 | ENSG00000177606 | Jun proto-oncogene, AP-1 transcription factor subunit                 |
| OCA2          | 0.76 | 5.21 | ENSG00000277361 | OCA2 melanosomal transmembrane protein                                |
| PTPRH         | 0.76 | 3.70 | ENSG00000080031 | protein tyrosine phosphatase, receptor type H                         |
| PLSCR4        | 0.76 | 2.66 | ENSG00000114698 | phospholipid scramblase 4                                             |
| NFKBIL1       | 0.76 | 5.06 | ENSG00000236196 | NFKB inhibitor like 1                                                 |
| PLEKHB1       | 0.76 | 7.21 | ENSG00000021300 | pleckstrin homology domain containing B1                              |
| LRIG3         | 0.76 | 5.58 | ENSG00000139263 | leucine rich repeats and immunoglobulin like domains 3                |
| TMEM178A      | 0.76 | 3.58 | ENSG00000152154 | transmembrane protein 178A                                            |
| ZCWPW1        | 0.76 | 1.57 | ENSG00000078487 | zinc finger CW-type and PWWP domain containing 1                      |
| TMEM81        | 0.76 | 2.43 | ENSG00000174529 | transmembrane protein 81                                              |
| LIPA          | 0.76 | 5.17 | ENSG00000107798 | lipase A, lysosomal acid type                                         |
| TANC1         | 0.76 | 6.03 | ENSG00000115183 | tetratricopeptide repeat, ankyrin repeat and coiled-coil containing 1 |
| TSPAN12       | 0.76 | 4.41 | ENSG00000106025 | tetraspanin 12                                                        |
| PEL12         | 0.76 | 4.34 | ENSG00000139946 | pellino E3 ubiquitin protein ligase family member 2                   |
| FRMD6         | 0.76 | 5.42 | ENSG00000139926 | FERM domain containing 6                                              |
| TMPO-AS1      | 0.76 | 2.52 | ENSG00000257167 | TMPO antisense RNA 1                                                  |
| FAM161B       | 0.76 | 1.33 | ENSG00000156050 | family with sequence similarity 161 member B                          |
| LIPE          | 0.76 | 1.33 | ENSG00000079435 | lipase E, hormone sensitive type                                      |
| WAC-AS1       | 0.76 | 3.56 | ENSG00000254635 | WAC antisense RNA 1 (head to head)                                    |
| RAB4B         | 0.76 | 3.26 | ENSG00000167578 | RAB4B, member RAS oncogene family                                     |
| ZNF251        | 0.76 | 4.28 | ENSG00000278062 | zinc finger protein 251                                               |
| PRRT1         | 0.76 | 1.75 | ENSG00000229071 | proline rich transmembrane protein 1                                  |

|              |      |      |                 |                                                               |
|--------------|------|------|-----------------|---------------------------------------------------------------|
| NOTUM        | 0.76 | 4.58 | ENSG00000185269 | NOTUM, palmitoleoyl-protein carboxylesterase                  |
| ANKRD6       | 0.76 | 3.29 | ENSG00000135299 | ankyrin repeat domain 6                                       |
| IL18BP       | 0.75 | 3.22 | ENSG00000137496 | interleukin 18 binding protein                                |
| CTD-2124B8.2 | 0.75 | 1.03 | ENSG00000270558 | N/A                                                           |
| KCNH3        | 0.75 | 1.03 | ENSG00000135519 | potassium voltage-gated channel subfamily H member 3          |
| SCG5         | 0.75 | 1.53 | ENSG00000281931 | secretogranin V                                               |
| CTC-444N24.8 | 0.75 | 2.20 | ENSG00000268713 | N/A                                                           |
| LYNX1        | 0.75 | 4.51 | ENSG00000180155 | Ly6/neurotoxin 1                                              |
| SPOCK3       | 0.75 | 1.81 | ENSG00000196104 | SPARC/osteonectin, cwcv and kazal like domains proteoglycan 3 |
| PORCN        | 0.75 | 2.04 | ENSG00000102312 | porcupine homolog (Drosophila)                                |
| ERBB3        | 0.75 | 7.64 | ENSG00000065361 | erb-b2 receptor tyrosine kinase 3                             |
| UBE2H        | 0.75 | 6.68 | ENSG00000186591 | ubiquitin conjugating enzyme E2 H                             |
| PACS1        | 0.75 | 9.12 | ENSG00000175115 | phosphofurin acidic cluster sorting protein 1                 |
| GABARAP      | 0.75 | 4.32 | ENSG00000170296 | GABA type A receptor-associated protein                       |
| TMEM54       | 0.75 | 3.39 | ENSG00000121900 | transmembrane protein 54                                      |
| RPL39L       | 0.75 | 4.82 | ENSG00000163923 | ribosomal protein L39 like                                    |
| PRSS12       | 0.74 | 4.50 | ENSG00000164099 | protease, serine 12                                           |
| DDX60L       | 0.74 | 2.29 | ENSG00000181381 | DEAD-box helicase 60-like                                     |
| HNRNPUL2     | 0.74 | 5.99 | ENSG00000214753 | heterogeneous nuclear ribonucleoprotein U like 2              |
| RP1-257A7.5  | 0.74 | 1.13 | ENSG00000272379 | N/A                                                           |
| FAM131C      | 0.74 | 2.39 | ENSG00000185519 | family with sequence similarity 131 member C                  |
| MIF4GD       | 0.74 | 3.43 | ENSG00000125457 | MIF4G domain containing                                       |
| ZNF528       | 0.74 | 4.28 | ENSG00000167555 | zinc finger protein 528                                       |
| LGALS3BP     | 0.74 | 8.99 | ENSG00000108679 | galectin 3 binding protein                                    |
| FABP1        | 0.74 | 5.03 | ENSG00000163586 | fatty acid binding protein 1                                  |
| CD7          | 0.74 | 4.16 | ENSG00000173762 | CD7 molecule                                                  |
| EFNA4        | 0.74 | 4.61 | ENSG00000243364 | ephrin A4                                                     |
| PROX1-AS1    | 0.74 | 2.64 | ENSG00000272167 | N/A                                                           |
| PLLP         | 0.74 | 3.53 | ENSG00000102934 | plasmolipin                                                   |

|               |      |      |                 |                                                                     |
|---------------|------|------|-----------------|---------------------------------------------------------------------|
| ENPP5         | 0.74 | 1.67 | ENSG00000112796 | ectonucleotide<br>pyrophosphatase/phosphodiesterase 5<br>(putative) |
| LRRC31        | 0.74 | 1.67 | ENSG00000114248 | leucine rich repeat containing 31                                   |
| TNIK          | 0.74 | 5.90 | ENSG00000154310 | TRAF2 and NCK interacting kinase                                    |
| PCLO          | 0.74 | 2.06 | ENSG00000186472 | piccolo presynaptic cytomatrix protein                              |
| JUNB          | 0.74 | 6.97 | ENSG00000171223 | JunB proto-oncogene, AP-1 transcription<br>factor subunit           |
| LYN           | 0.74 | 5.15 | ENSG00000254087 | LYN proto-oncogene, Src family<br>tyrosine kinase                   |
| HSPA1A        | 0.74 | 4.76 | ENSG00000234475 | heat shock protein family A (Hsp70)<br>member 1A                    |
| TRIM2         | 0.74 | 3.41 | ENSG00000109654 | tripartite motif containing 2                                       |
| TACC1         | 0.74 | 7.76 | ENSG00000147526 | transforming acidic coiled-coil<br>containing protein 1             |
| AMACR         | 0.74 | 1.56 | ENSG00000242110 | alpha-methylacyl-CoA racemase                                       |
| CCDC148       | 0.74 | 1.56 | ENSG00000153237 | coiled-coil domain containing 148                                   |
| FMO4          | 0.74 | 2.19 | ENSG00000076258 | flavin containing monooxygenase 4                                   |
| GINM1         | 0.74 | 3.76 | ENSG00000055211 | glycoprotein integral membrane 1                                    |
| ZNF93         | 0.74 | 4.77 | ENSG00000184635 | zinc finger protein 93                                              |
| LCA5          | 0.74 | 4.31 | ENSG00000135338 | LCA5, lebercilin                                                    |
| FSTL3         | 0.74 | 7.28 | ENSG00000070404 | folliculin like 3                                                   |
| MAP3K12       | 0.74 | 1.22 | ENSG00000139625 | mitogen-activated protein kinase kinase<br>kinase 12                |
| SIDT2         | 0.74 | 3.84 | ENSG00000149577 | SID1 transmembrane family member 2                                  |
| RP11-421F16.3 | 0.74 | 3.39 | ENSG00000247903 | N/A                                                                 |
| VIM           | 0.73 | 9.03 | ENSG0000026025  | vimentin                                                            |
| RARG          | 0.73 | 1.89 | ENSG00000172819 | retinoic acid receptor gamma                                        |
| KIFAP3        | 0.73 | 5.01 | ENSG00000075945 | kinesin associated protein 3                                        |
| RCOR2         | 0.73 | 4.42 | ENSG00000167771 | REST corepressor 2                                                  |
| TMEM179B      | 0.73 | 5.08 | ENSG00000185475 | transmembrane protein 179B                                          |
| TPBG          | 0.73 | 5.91 | ENSG00000283085 | trophoblast glycoprotein                                            |
| RAB30-AS1     | 0.73 | 1.63 | ENSG00000246067 | RAB30 antisense RNA 1 (head to head)                                |
| PPP1R26       | 0.73 | 4.67 | ENSG00000196422 | protein phosphatase 1 regulatory subunit<br>26                      |
| CD99P1        | 0.73 | 1.07 | ENSG00000223773 | CD99 molecule pseudogene 1                                          |

|           |      |       |                 |                                                        |
|-----------|------|-------|-----------------|--------------------------------------------------------|
| RABL2A    | 0.73 | 2.28  | ENSG00000144134 | RAB, member of RAS oncogene family-like 2A             |
| CKAP2L    | 0.73 | 5.73  | ENSG00000169607 | cytoskeleton associated protein 2 like                 |
| GUCY1A2   | 0.73 | 5.18  | ENSG00000152402 | guanylate cyclase 1 soluble subunit alpha 2            |
| CRTC2     | 0.73 | 6.37  | ENSG00000160741 | CREB regulated transcription coactivator 2             |
| GRAMD1C   | 0.73 | 2.08  | ENSG00000178075 | GRAM domain containing 1C                              |
| FBXO2     | 0.73 | 4.73  | ENSG00000116661 | F-box protein 2                                        |
| SERPINA1  | 0.73 | 10.82 | ENSG00000197249 | serpin family A member 1                               |
| PCDHGB4   | 0.73 | 1.52  | ENSG00000253953 | protocadherin gamma subfamily B, 4                     |
| AIFM3     | 0.73 | 1.70  | ENSG00000183773 | apoptosis inducing factor, mitochondria associated 3   |
| LYPD6B    | 0.73 | 5.37  | ENSG00000150556 | LY6/PLAUR domain containing 6B                         |
| RHBG      | 0.73 | 2.13  | ENSG00000132677 | Rh family B glycoprotein (gene/pseudogene)             |
| TPST1     | 0.73 | 5.20  | ENSG00000169902 | tyrosylprotein sulfotransferase 1                      |
| PAPLN     | 0.73 | 2.86  | ENSG00000100767 | papilin, proteoglycan like sulfated glycoprotein       |
| OS9       | 0.72 | 7.36  | ENSG00000135506 | OS9, endoplasmic reticulum lectin                      |
| LINC00694 | 0.72 | 1.17  | ENSG00000225873 | long intergenic non-protein coding RNA 694             |
| PRKD1     | 0.72 | 4.45  | ENSG00000184304 | protein kinase D1                                      |
| SPA17     | 0.72 | 2.18  | ENSG00000064199 | sperm autoantigenic protein 17                         |
| FOXO3     | 0.72 | 4.52  | ENSG00000118689 | forkhead box O3                                        |
| ATP2B4    | 0.72 | 3.46  | ENSG00000058668 | ATPase plasma membrane Ca <sup>2+</sup> transporting 4 |
| SPTLC3    | 0.72 | 2.95  | ENSG00000172296 | serine palmitoyltransferase long chain base subunit 3  |
| FURIN     | 0.72 | 9.47  | ENSG00000140564 | furin, paired basic amino acid cleaving enzyme         |
| MFSD6     | 0.72 | 5.79  | ENSG00000151690 | major facilitator superfamily domain containing 6      |
| NKIRAS1   | 0.72 | 3.17  | ENSG00000197885 | NFKB inhibitor interacting Ras like 1                  |
| LINC00315 | 0.72 | 1.01  | ENSG00000184274 | long intergenic non-protein coding RNA 315             |
| CPLX1     | 0.72 | 3.94  | ENSG00000168993 | complexin 1                                            |
| LMAN2L    | 0.72 | 6.15  | ENSG00000114988 | lectin, mannose binding 2 like                         |



|               |      |      |                 |                                                                      |
|---------------|------|------|-----------------|----------------------------------------------------------------------|
| ZNF879        | 0.72 | 2.27 | ENSG00000234284 | zinc finger protein 879                                              |
| ARRDC2        | 0.71 | 3.82 | ENSG00000105643 | arrestin domain containing 2                                         |
| BTC           | 0.71 | 2.31 | ENSG00000174808 | betacellulin                                                         |
| TRAK2         | 0.71 | 5.52 | ENSG00000115993 | trafficking kinesin protein 2                                        |
| BTG3          | 0.71 | 4.56 | ENSG00000281484 | BTG anti-proliferation factor 3                                      |
| RASSF3        | 0.71 | 6.41 | ENSG00000153179 | Ras association domain family member 3                               |
| PPM1H         | 0.71 | 6.15 | ENSG00000111110 | protein phosphatase, Mg <sup>2+</sup> /Mn <sup>2+</sup> dependent 1H |
| SYS1          | 0.71 | 5.80 | ENSG00000204070 | SYS1, golgi trafficking protein                                      |
| FAM76A        | 0.71 | 2.76 | ENSG00000009780 | family with sequence similarity 76 member A                          |
| RP11-488C13.5 | 0.71 | 1.11 | ENSG00000258301 | N/A                                                                  |
| RP11-384K6.6  | 0.71 | 1.78 | ENSG00000260404 | N/A                                                                  |
| CCDC88B       | 0.71 | 2.24 | ENSG00000168071 | coiled-coil domain containing 88B                                    |
| HLA-L         | 0.71 | 2.87 | ENSG00000243753 | major histocompatibility complex, class I, L (pseudogene)            |
| CTBP2         | 0.71 | 5.34 | ENSG00000175029 | C-terminal binding protein 2                                         |
| CTD-2366F13.1 | 0.71 | 1.42 | ENSG00000247796 | N/A                                                                  |
| TP53INP2      | 0.71 | 5.91 | ENSG00000078804 | tumor protein p53 inducible nuclear protein 2                        |
| DHRS12        | 0.71 | 1.20 | ENSG00000102796 | dehydrogenase/reductase 12                                           |
| C4orf19       | 0.71 | 5.14 | ENSG00000154274 | chromosome 4 open reading frame 19                                   |
| KLHL13        | 0.70 | 3.05 | ENSG00000003096 | kelch like family member 13                                          |
| CDH7          | 0.70 | 2.47 | ENSG00000081138 | cadherin 7                                                           |
| RFX2          | 0.70 | 4.24 | ENSG00000087903 | regulatory factor X2                                                 |
| PRRG2         | 0.70 | 1.50 | ENSG00000126460 | proline rich and Gla domain 2                                        |
| FLRT3         | 0.70 | 5.99 | ENSG00000125848 | fibronectin leucine rich transmembrane protein 3                     |
| MAPKAPK2      | 0.70 | 7.09 | ENSG00000162889 | mitogen-activated protein kinase-activated protein kinase 2          |
| ZNF613        | 0.70 | 2.83 | ENSG00000176024 | zinc finger protein 613                                              |
| INSIG2        | 0.70 | 5.39 | ENSG00000125629 | insulin induced gene 2                                               |
| ZNF827        | 0.70 | 4.52 | ENSG00000151612 | zinc finger protein 827                                              |
| WDPCP         | 0.70 | 2.41 | ENSG00000143951 | WD repeat containing planar cell polarity effector                   |

|              |      |      |                 |                                                    |
|--------------|------|------|-----------------|----------------------------------------------------|
| C17orf97     | 0.70 | 3.12 | ENSG00000187624 | chromosome 17 open reading frame 97                |
| LINC00176    | 0.70 | 1.29 | ENSG00000196421 | long intergenic non-protein coding RNA 176         |
| ZNF345       | 0.70 | 1.29 | ENSG00000251247 | zinc finger protein 345                            |
| SOX2         | 0.70 | 3.83 | ENSG00000181449 | SRY-box 2                                          |
| NBEA         | 0.70 | 1.57 | ENSG00000172915 | neurobeachin                                       |
| BCL11A       | 0.70 | 3.25 | ENSG00000119866 | B-cell CLL/lymphoma 11A                            |
| GPR137B      | 0.70 | 2.19 | ENSG00000077585 | G protein-coupled receptor 137B                    |
| MIR24-2      | 0.70 | 2.19 | ENSG00000267519 | microRNA 24-2                                      |
| HID1         | 0.70 | 6.42 | ENSG00000167861 | HID1 domain containing                             |
| B4GALT5      | 0.70 | 6.79 | ENSG00000158470 | beta-1,4-galactosyltransferase 5                   |
| REC8         | 0.70 | 1.38 | ENSG00000100918 | REC8 meiotic recombination protein                 |
| RP11-96K19.2 | 0.70 | 1.38 | ENSG00000232811 | N/A                                                |
| IRF2         | 0.70 | 4.80 | ENSG00000168310 | interferon regulatory factor 2                     |
| ZNF132       | 0.70 | 1.64 | ENSG00000131849 | zinc finger protein 132                            |
| MOK          | 0.70 | 1.87 | ENSG00000080823 | MOK protein kinase                                 |
| TSPAN33      | 0.70 | 3.51 | ENSG00000158457 | tetraspanin 33                                     |
| TNFAIP8      | 0.70 | 4.93 | ENSG00000145779 | TNF alpha induced protein 8                        |
| RNF43        | 0.69 | 6.61 | ENSG00000108375 | ring finger protein 43                             |
| CDC42SE2     | 0.69 | 6.15 | ENSG00000158985 | CDC42 small effector 2                             |
| C14orf28     | 0.69 | 1.92 | ENSG00000179476 | chromosome 14 open reading frame 28                |
| RP4-635E18.8 | 0.69 | 1.71 | ENSG00000271895 | N/A                                                |
| MUC1         | 0.69 | 1.15 | ENSG00000185499 | mucin 1, cell surface associated                   |
| EFNA2        | 0.69 | 6.50 | ENSG00000099617 | ephrin A2                                          |
| ZNF69        | 0.69 | 3.32 | ENSG00000198429 | zinc finger protein 69                             |
| F10          | 0.69 | 5.49 | ENSG00000126218 | coagulation factor X                               |
| NMI          | 0.69 | 2.63 | ENSG00000123609 | N-myc and STAT interactor                          |
| AC005355.2   | 0.69 | 1.77 | ENSG00000251169 | N/A                                                |
| SNAPC1       | 0.69 | 1.77 | ENSG00000023608 | small nuclear RNA activating complex polypeptide 1 |
| C4BPA        | 0.69 | 4.80 | ENSG00000123838 | complement component 4 binding protein alpha       |
| SRP14-AS1    | 0.69 | 1.53 | ENSG00000248508 | SRP14 antisense RNA1 (head to head)                |
| ARSG         | 0.69 | 1.24 | ENSG00000141337 | arylsulfatase G                                    |
| ERCC5        | 0.69 | 4.56 | ENSG00000134899 | ERCC excision repair 5, endonuclease               |
| SRGAP1       | 0.69 | 2.57 | ENSG00000196935 | SLIT-ROBO Rho GTPase activating protein 1          |

|              |      |       |                 |                                                            |
|--------------|------|-------|-----------------|------------------------------------------------------------|
| EFEMP1       | 0.69 | 2.84  | ENSG00000115380 | EGF containing fibulin like extracellular matrix protein 1 |
| THRA         | 0.69 | 5.04  | ENSG00000126351 | thyroid hormone receptor, alpha                            |
| EPB41L2      | 0.69 | 8.16  | ENSG00000079819 | erythrocyte membrane protein band 4.1 like 2               |
| LEPROT       | 0.69 | 3.51  | ENSG00000213625 | leptin receptor overlapping transcript                     |
| LIN37        | 0.69 | 1.60  | ENSG00000267796 | lin-37 DREAM MuvB core complex component                   |
| DHRS3        | 0.69 | 5.44  | ENSG00000162496 | dehydrogenase/reductase 3                                  |
| TRIOBP       | 0.69 | 4.03  | ENSG00000100106 | TRIO and F-actin binding protein                           |
| GPR153       | 0.68 | 3.46  | ENSG00000158292 | G protein-coupled receptor 153                             |
| YPEL2        | 0.68 | 5.01  | ENSG00000175155 | yippee like 2                                              |
| TMEM217      | 0.68 | 2.13  | ENSG00000172738 | transmembrane protein 217                                  |
| GRAMD3       | 0.68 | 3.57  | ENSG00000155324 | GRAM domain containing 3                                   |
| GCNT4        | 0.68 | 3.94  | ENSG00000176928 | glucosaminyl (N-acetyl) transferase 4, core 2              |
| RBP1         | 0.68 | 5.06  | ENSG00000114115 | retinol binding protein 1                                  |
| SCAMP5       | 0.68 | 5.99  | ENSG00000198794 | secretory carrier membrane protein 5                       |
| IL27RA       | 0.68 | 4.28  | ENSG00000104998 | interleukin 27 receptor subunit alpha                      |
| C3           | 0.68 | 12.11 | ENSG00000125730 | complement C3                                              |
| ZNF585B      | 0.68 | 3.61  | ENSG00000245680 | zinc finger protein 585B                                   |
| WWP1         | 0.68 | 6.40  | ENSG00000123124 | WW domain containing E3 ubiquitin protein ligase 1         |
| KIAA1462     | 0.68 | 4.28  | ENSG00000165757 | KIAA1462                                                   |
| SSTR2        | 0.68 | 3.72  | ENSG00000180616 | somatostatin receptor 2                                    |
| AK9          | 0.68 | 2.49  | ENSG00000155085 | adenylate kinase 9                                         |
| SMURF1       | 0.68 | 5.85  | ENSG00000198742 | SMAD specific E3 ubiquitin protein ligase 1                |
| KSR1         | 0.68 | 3.58  | ENSG00000141068 | kinase suppressor of ras 1                                 |
| SAT1         | 0.68 | 5.55  | ENSG00000130066 | spermidine/spermine N1-acetyltransferase 1                 |
| STIM2        | 0.68 | 6.75  | ENSG00000109689 | stromal interaction molecule 2                             |
| AC074289.1   | 0.68 | 1.86  | ENSG00000225889 | N/A                                                        |
| PACRGL       | 0.68 | 4.83  | ENSG00000163138 | PARK2 coregulated like                                     |
| AC022007.5   | 0.67 | 1.91  | ENSG00000206567 | N/A                                                        |
| RP11-465N4.4 | 0.67 | 1.91  | ENSG00000234678 | N/A                                                        |
| TNNI1        | 0.67 | 2.92  | ENSG00000159173 | troponin I1, slow skeletal type                            |

|              |      |      |                 |                                                  |
|--------------|------|------|-----------------|--------------------------------------------------|
| ITGB1P1      | 0.67 | 1.19 | ENSG00000269378 | integrin subunit beta 1 pseudogene 1             |
| WBP1         | 0.67 | 2.60 | ENSG00000239779 | WW domain binding protein 1                      |
| SLC39A7      | 0.67 | 8.30 | ENSG00000227402 | solute carrier family 39 member 7                |
| CSPP1        | 0.67 | 5.63 | ENSG00000104218 | centrosome and spindle pole associated protein 1 |
| C11orf74     | 0.67 | 5.18 | ENSG00000166352 | chromosome 11 open reading frame 74              |
| RBM3         | 0.67 | 6.29 | ENSG00000102317 | RNA binding motif (RNP1, RRM) protein 3          |
| KLHL24       | 0.67 | 5.62 | ENSG00000114796 | kelch like family member 24                      |
| COL12A1      | 0.67 | 3.14 | ENSG00000111799 | collagen type XII alpha 1 chain                  |
| SYNGR1       | 0.67 | 3.39 | ENSG00000100321 | synaptogyrin 1                                   |
| TOX3         | 0.67 | 6.87 | ENSG00000103460 | TOX high mobility group box family member 3      |
| HINT3        | 0.67 | 4.43 | ENSG00000111911 | histidine triad nucleotide binding protein 3     |
| VPS45        | 0.67 | 5.81 | ENSG00000136631 | vacuolar protein sorting 45 homolog              |
| TM6SF1       | 0.67 | 2.07 | ENSG00000136404 | transmembrane 6 superfamily member 1             |
| PERP         | 0.67 | 7.62 | ENSG00000112378 | PERP, TP53 apoptosis effector                    |
| IQCE         | 0.67 | 6.38 | ENSG00000106012 | IQ motif containing E                            |
| GMDS-AS1     | 0.67 | 1.36 | ENSG00000250903 | GMDS antisense RNA 1 (head to head)              |
| RP11-119F7.5 | 0.67 | 2.12 | ENSG00000260400 | N/A                                              |
| SMPDL3B      | 0.67 | 2.98 | ENSG00000130768 | sphingomyelin phosphodiesterase acid like 3B     |
| TBPL1        | 0.67 | 4.77 | ENSG00000028839 | TATA-box binding protein like 1                  |
| AP001062.7   | 0.67 | 1.82 | ENSG00000184441 | N/A                                              |
| ZNF793       | 0.67 | 3.15 | ENSG00000188227 | zinc finger protein 793                          |
| STYXL1       | 0.67 | 4.80 | ENSG00000127952 | serine/threonine/tyrosine interacting like 1     |
| AKTIP        | 0.67 | 2.17 | ENSG00000166971 | AKT interacting protein                          |
| MYO16        | 0.67 | 1.44 | ENSG00000282848 | myosin XVI                                       |
| RP3-508I15.9 | 0.67 | 1.44 | ENSG00000228274 | N/A                                              |
| PDGFA        | 0.67 | 6.20 | ENSG00000197461 | platelet derived growth factor subunit A         |
| C15orf52     | 0.67 | 6.41 | ENSG00000188549 | chromosome 15 open reading frame 52              |
| RHOBTB1      | 0.66 | 5.17 | ENSG00000072422 | Rho related BTB domain containing 1              |
| CAPN5        | 0.66 | 3.92 | ENSG00000149260 | calpain 5                                        |
| NEK2         | 0.66 | 5.65 | ENSG00000117650 | NIMA related kinase 2                            |

|               |      |       |                 |                                                                |
|---------------|------|-------|-----------------|----------------------------------------------------------------|
| NPDC1         | 0.66 | 3.84  | ENSG00000107281 | neural proliferation, differentiation and control 1            |
| ZNF432        | 0.66 | 3.40  | ENSG00000256087 | zinc finger protein 432                                        |
| C8orf37       | 0.66 | 1.99  | ENSG00000156172 | chromosome 8 open reading frame 37                             |
| SLC22A3       | 0.66 | 4.32  | ENSG00000146477 | solute carrier family 22 member 3                              |
| DAZAP2P1      | 0.66 | 1.59  | ENSG00000223825 | DAZ associated protein 2 pseudogene 1                          |
| SNAI2         | 0.66 | 1.59  | ENSG00000019549 | snail family transcriptional repressor 2                       |
| DYNLT3        | 0.66 | 4.41  | ENSG00000165169 | dynein light chain Tctex-type 3                                |
| HIST1H2BD     | 0.66 | 3.63  | ENSG00000158373 | histone cluster 1 H2B family member d                          |
| ARHGEF38      | 0.66 | 1.03  | ENSG00000236699 | Rho guanine nucleotide exchange factor 38                      |
| RPGRIP1       | 0.66 | 1.03  | ENSG00000092200 | retinitis pigmentosa GTPase regulator interacting protein 1    |
| CTD-2561J22.5 | 0.66 | 2.14  | ENSG00000268119 | N/A                                                            |
| IL17RC        | 0.66 | 4.99  | ENSG00000163702 | interleukin 17 receptor C                                      |
| CTSO          | 0.66 | 3.01  | ENSG00000256043 | cathepsin O                                                    |
| IER5          | 0.66 | 4.63  | ENSG00000162783 | immediate early response 5                                     |
| CDH6          | 0.66 | 8.10  | ENSG00000113361 | cadherin 6                                                     |
| LRCH1         | 0.66 | 3.26  | ENSG00000136141 | leucine rich repeats and calponin homology domain containing 1 |
| ELK4          | 0.66 | 5.74  | ENSG00000158711 | ELK4, ETS transcription factor                                 |
| SERPINA5      | 0.66 | 8.55  | ENSG00000188488 | serpin family A member 5                                       |
| C14orf79      | 0.66 | 3.28  | ENSG00000140104 | chromosome 14 open reading frame 79                            |
| GLP2R         | 0.66 | 2.28  | ENSG00000065325 | glucagon like peptide 2 receptor                               |
| TMEM37        | 0.66 | 6.78  | ENSG00000171227 | transmembrane protein 37                                       |
| KIF6          | 0.65 | 1.90  | ENSG00000164627 | kinesin family member 6                                        |
| NDRG4         | 0.65 | 3.68  | ENSG00000103034 | NDRG family member 4                                           |
| AP2B1         | 0.65 | 8.20  | ENSG00000006125 | adaptor related protein complex 2 beta 1 subunit               |
| CYB561        | 0.65 | 5.82  | ENSG00000008283 | cytochrome b561                                                |
| SUCO          | 0.65 | 7.89  | ENSG00000094975 | SUN domain containing ossification factor                      |
| B4GALT4       | 0.65 | 4.47  | ENSG00000121578 | beta-1,4-galactosyltransferase 4                               |
| ECE1          | 0.65 | 7.18  | ENSG00000117298 | endothelin converting enzyme 1                                 |
| FN1           | 0.65 | 11.10 | ENSG00000115414 | fibronectin 1                                                  |
| ZMIZ2         | 0.65 | 7.59  | ENSG00000122515 | zinc finger MIZ-type containing 2                              |
| RP11-428J1.5  | 0.65 | 1.47  | ENSG00000272142 | N/A                                                            |

|               |      |      |                 |                                                        |
|---------------|------|------|-----------------|--------------------------------------------------------|
| NPNT          | 0.65 | 5.47 | ENSG00000168743 | nephronectin                                           |
| CRMP1         | 0.65 | 3.35 | ENSG00000072832 | collapsin response mediator protein 1                  |
| SMAD7         | 0.65 | 5.52 | ENSG00000101665 | SMAD family member 7                                   |
| TMEM127       | 0.65 | 6.88 | ENSG00000135956 | transmembrane protein 127                              |
| PTPN12        | 0.65 | 7.31 | ENSG00000127947 | protein tyrosine phosphatase, non-receptor type 12     |
| LRIG1         | 0.65 | 5.13 | ENSG00000282243 | leucine rich repeats and immunoglobulin like domains 1 |
| MALAT1        | 0.65 | 6.51 | ENSG00000278217 | Metastasis associated lung adenocarcinoma transcript 1 |
| MSN           | 0.65 | 7.76 | ENSG00000147065 | moesin                                                 |
| NXPH4         | 0.65 | 2.66 | ENSG00000182379 | neurexophilin 4                                        |
| RHBDF2        | 0.65 | 6.82 | ENSG00000129667 | rhomboid 5 homolog 2                                   |
| MRPL53        | 0.65 | 1.68 | ENSG00000204822 | mitochondrial ribosomal protein L53                    |
| TMEM237       | 0.65 | 5.82 | ENSG00000155755 | transmembrane protein 237                              |
| PAQR8         | 0.65 | 8.43 | ENSG00000170915 | progesterin and adipoQ receptor family member 8        |
| TMCC3         | 0.65 | 3.08 | ENSG00000057704 | transmembrane and coiled-coil domain family 3          |
| RP11-568K15.1 | 0.65 | 3.10 | ENSG00000242193 | N/A                                                    |
| CHODL         | 0.65 | 5.41 | ENSG00000154645 | chondrolectin                                          |
| PPCS          | 0.65 | 4.49 | ENSG00000127125 | phosphopantothenoylcysteine synthetase                 |
| ZNF667-AS1    | 0.64 | 4.12 | ENSG00000166770 | ZNF667 antisense RNA 1 (head to head)                  |
| CDON          | 0.64 | 5.43 | ENSG00000064309 | cell adhesion associated, oncogene regulated           |
| ZNF90         | 0.64 | 2.60 | ENSG00000213988 | zinc finger protein 90                                 |
| BLOC1S1       | 0.64 | 4.09 | ENSG00000135441 | biogenesis of lysosomal organelles complex 1 subunit 1 |
| MAN2B2        | 0.64 | 6.36 | ENSG00000013288 | mannosidase alpha class 2B member 2                    |
| ITGA7         | 0.64 | 2.08 | ENSG00000135424 | integrin subunit alpha 7                               |
| PDE3A         | 0.64 | 2.08 | ENSG00000172572 | phosphodiesterase 3A                                   |
| SMOC1         | 0.64 | 5.09 | ENSG00000198732 | SPARC related modular calcium binding 1                |
| CCNG2         | 0.64 | 4.74 | ENSG00000138764 | cyclin G2                                              |
| WWC1          | 0.64 | 7.69 | ENSG00000113645 | WW and C2 domain containing 1                          |
| CLMN          | 0.64 | 5.98 | ENSG00000165959 | calmin                                                 |
| OPLAH         | 0.64 | 3.82 | ENSG00000178814 | 5-oxoprolinase (ATP-hydrolysing)                       |

|            |      |      |                 |                                                          |
|------------|------|------|-----------------|----------------------------------------------------------|
| TIFA       | 0.64 | 4.51 | ENSG00000145365 | TRAF interacting protein with forkhead associated domain |
| MFAP4      | 0.64 | 1.42 | ENSG00000166482 | microfibrillar associated protein 4                      |
| GRN        | 0.64 | 8.42 | ENSG00000030582 | granulin precursor                                       |
| ABCB4      | 0.64 | 2.58 | ENSG00000005471 | ATP binding cassette subfamily B member 4                |
| GALNT11    | 0.64 | 4.70 | ENSG00000178234 | polypeptide N-acetylgalactosaminyltransferase 11         |
| PTBP3      | 0.64 | 7.77 | ENSG00000119314 | polypyrimidine tract binding protein 3                   |
| RNF215     | 0.64 | 1.64 | ENSG00000099999 | ring finger protein 215                                  |
| ZNF571     | 0.64 | 1.71 | ENSG00000180479 | zinc finger protein 571                                  |
| DLGAP1-AS1 | 0.64 | 3.46 | ENSG00000177337 | DLGAP1 antisense RNA 1                                   |
| DEGS1      | 0.64 | 6.56 | ENSG00000143753 | delta 4-desaturase, sphingolipid 1                       |
| UPP1       | 0.64 | 3.52 | ENSG00000183696 | uridine phosphorylase 1                                  |
| TCF7L2     | 0.64 | 5.84 | ENSG00000148737 | transcription factor 7 like 2                            |
| AP3S2      | 0.64 | 3.57 | ENSG00000157823 | adaptor related protein complex 3 sigma 2 subunit        |
| ZNF347     | 0.64 | 2.98 | ENSG00000197937 | zinc finger protein 347                                  |
| FUT4       | 0.64 | 4.03 | ENSG00000196371 | fucosyltransferase 4                                     |
| RPGR       | 0.64 | 3.01 | ENSG00000156313 | retinitis pigmentosa GTPase regulator                    |
| IFITM2     | 0.63 | 5.50 | ENSG00000185201 | interferon induced transmembrane protein 2               |
| TTLL1      | 0.63 | 3.25 | ENSG00000100271 | tubulin tyrosine ligase like 1                           |
| C11orf80   | 0.63 | 5.49 | ENSG00000173715 | chromosome 11 open reading frame 80                      |
| ATXN1      | 0.63 | 4.09 | ENSG00000124788 | ataxin 1                                                 |
| PTX3       | 0.63 | 4.53 | ENSG00000163661 | pentraxin 3                                              |
| TNFRSF10B  | 0.63 | 7.00 | ENSG00000120889 | TNF receptor superfamily member 10b                      |
| ATF3       | 0.63 | 5.03 | ENSG00000162772 | activating transcription factor 3                        |
| PCSK1N     | 0.63 | 2.66 | ENSG00000102109 | proprotein convertase subtilisin/kexin type 1 inhibitor  |
| ZNF773     | 0.63 | 2.82 | ENSG00000152439 | zinc finger protein 773                                  |
| SNX18      | 0.63 | 6.55 | ENSG00000178996 | sorting nexin 18                                         |
| IFNLR1     | 0.63 | 4.37 | ENSG00000185436 | interferon lambda receptor 1                             |
| MYH9       | 0.63 | 8.76 | ENSG00000100345 | myosin heavy chain 9                                     |
| PLCD4      | 0.63 | 3.30 | ENSG00000115556 | phospholipase C delta 4                                  |
| TMEM69     | 0.63 | 4.99 | ENSG00000159596 | transmembrane protein 69                                 |
| PSD4       | 0.63 | 4.54 | ENSG00000125637 | pleckstrin and Sec7 domain containing 4                  |

|               |      |      |                 |                                                    |
|---------------|------|------|-----------------|----------------------------------------------------|
| STK38L        | 0.63 | 5.40 | ENSG00000211455 | serine/threonine kinase 38 like                    |
| ATL3          | 0.63 | 5.64 | ENSG00000184743 | atlastin GTPase 3                                  |
| F2R           | 0.63 | 4.35 | ENSG00000181104 | coagulation factor II thrombin receptor            |
| ORAI3         | 0.63 | 2.83 | ENSG00000175938 | ORAI calcium release-activated calcium modulator 3 |
| ZKSCAN7       | 0.63 | 2.77 | ENSG00000281894 | zinc finger with KRAB and SCAN domains 7           |
| PFN2          | 0.63 | 6.18 | ENSG00000070087 | profilin 2                                         |
| SPINK1        | 0.63 | 1.97 | ENSG00000164266 | serine peptidase inhibitor, Kazal type 1           |
| PTPRB         | 0.63 | 1.60 | ENSG00000127329 | protein tyrosine phosphatase, receptor type B      |
| C6orf226      | 0.62 | 1.20 | ENSG00000221821 | chromosome 6 open reading frame 226                |
| RP11-25K19.1  | 0.62 | 1.01 | ENSG00000167912 | N/A                                                |
| TMEM87B       | 0.62 | 4.74 | ENSG00000153214 | transmembrane protein 87B                          |
| SHFM1         | 0.62 | 6.15 | ENSG00000127922 | split hand/foot malformation (ectrodactyly) type 1 |
| ZSCAN16       | 0.62 | 4.05 | ENSG00000196812 | zinc finger and SCAN domain containing 16          |
| SATB1         | 0.62 | 3.85 | ENSG00000182568 | SATB homeobox 1                                    |
| WASF1         | 0.62 | 6.21 | ENSG00000112290 | WAS protein family member 1                        |
| C1QTNF1       | 0.62 | 3.68 | ENSG00000173918 | C1q and tumor necrosis factor related protein 1    |
| ZBTB22        | 0.62 | 4.53 | ENSG00000206280 | zinc finger and BTB domain containing 22           |
| CAB39         | 0.62 | 7.07 | ENSG00000135932 | calcium binding protein 39                         |
| LRP12         | 0.62 | 4.18 | ENSG00000147650 | LDL receptor related protein 12                    |
| AGMO          | 0.62 | 5.16 | ENSG00000187546 | alkylglycerol monooxygenase                        |
| TAPBP         | 0.62 | 6.46 | ENSG00000236490 | TAP binding protein                                |
| KRT17         | 0.62 | 3.47 | ENSG00000128422 | keratin 17                                         |
| MICALL2       | 0.62 | 4.43 | ENSG00000164877 | MICAL like 2                                       |
| NOTCH3        | 0.62 | 6.32 | ENSG00000074181 | notch 3                                            |
| IFT52         | 0.62 | 4.95 | ENSG00000101052 | intraflagellar transport 52                        |
| CTD-2368P22.1 | 0.62 | 3.39 | ENSG00000176593 | N/A                                                |
| ANPEP         | 0.62 | 6.96 | ENSG00000166825 | alanyl aminopeptidase, membrane                    |
| SUMO2         | 0.62 | 6.94 | ENSG00000188612 | small ubiquitin-like modifier 2                    |



|              |      |       |                 |                                                           |
|--------------|------|-------|-----------------|-----------------------------------------------------------|
| ALDH3B1      | 0.62 | 1.88  | ENSG00000006534 | aldehyde dehydrogenase 3 family member B1                 |
| GPRC5C       | 0.62 | 7.40  | ENSG00000170412 | G protein-coupled receptor class C group 5 member C       |
| ZNF300       | 0.61 | 5.16  | ENSG00000145908 | zinc finger protein 300                                   |
| ZNF331       | 0.61 | 5.12  | ENSG00000130844 | zinc finger protein 331                                   |
| ZSCAN18      | 0.61 | 5.05  | ENSG00000121413 | zinc finger and SCAN domain containing 18                 |
| CLU          | 0.61 | 10.57 | ENSG00000120885 | clusterin                                                 |
| CASK         | 0.61 | 5.72  | ENSG00000147044 | calcium/calmodulin dependent serine protein kinase        |
| PAK1         | 0.61 | 5.40  | ENSG00000149269 | p21 (RAC1) activated kinase 1                             |
| ADPRHL1      | 0.61 | 2.34  | ENSG00000153531 | ADP-ribosylhydrolase like 1                               |
| RP11-864N7.2 | 0.61 | 2.34  | ENSG00000227615 | N/A                                                       |
| ABCB1        | 0.61 | 5.95  | ENSG00000085563 | ATP binding cassette subfamily B member 1                 |
| BAMBI        | 0.61 | 6.40  | ENSG00000095739 | BMP and activin membrane bound inhibitor                  |
| JOSD2        | 0.61 | 3.43  | ENSG00000161677 | Josephin domain containing 2                              |
| SLC25A45     | 0.61 | 4.35  | ENSG00000162241 | solute carrier family 25 member 45                        |
| ZFYVE1       | 0.61 | 4.60  | ENSG00000165861 | zinc finger FYVE-type containing 1                        |
| ST6GALNAC6   | 0.61 | 2.62  | ENSG00000160408 | ST6 N-acetylgalactosaminide alpha-2,6-sialyltransferase 6 |
| COX16        | 0.61 | 3.55  | ENSG00000133983 | COX16, cytochrome c oxidase assembly homolog              |
| XPR1         | 0.61 | 7.18  | ENSG00000143324 | xenotropic and polytropic retrovirus receptor 1           |
| POMT2        | 0.61 | 5.60  | ENSG00000009830 | protein O-mannosyltransferase 2                           |
| STMN1        | 0.61 | 8.94  | ENSG00000117632 | stathmin 1                                                |
| KDELR3       | 0.61 | 5.53  | ENSG00000100196 | KDEL endoplasmic reticulum protein retention receptor 3   |
| C20orf196    | 0.61 | 1.05  | ENSG00000171984 | chromosome 20 open reading frame 196                      |
| OIP5         | 0.61 | 3.63  | ENSG00000104147 | Opa interacting protein 5                                 |
| LINC00094    | 0.61 | 3.97  | ENSG00000235106 | long intergenic non-protein coding RNA 94                 |
| AGBL2        | 0.61 | 1.90  | ENSG00000165923 | ATP/GTP binding protein like 2                            |
| MAP3K1       | 0.60 | 5.80  | ENSG00000095015 | mitogen-activated protein kinase kinase kinase 1          |

|            |       |       |                 |                                                                              |
|------------|-------|-------|-----------------|------------------------------------------------------------------------------|
| TMEM182    | 0.60  | 2.31  | ENSG00000170417 | transmembrane protein 182                                                    |
| LIPH       | 0.60  | 2.70  | ENSG00000163898 | lipase H                                                                     |
| ZFP90      | 0.60  | 4.43  | ENSG00000184939 | ZFP90 zinc finger protein                                                    |
| PCMTD1     | 0.60  | 4.18  | ENSG00000168300 | protein-L-isoaspartate (D-aspartate) O-methyltransferase domain containing 1 |
| GRINA      | 0.60  | 8.31  | ENSG00000178719 | glutamate ionotropic receptor NMDA type subunit associated protein 1         |
| SERPING1   | 0.60  | 6.09  | ENSG00000149131 | serpin family G member 1                                                     |
| TCTN1      | 0.60  | 3.14  | ENSG00000204852 | tectonic family member 1                                                     |
| TP53I3     | 0.60  | 4.80  | ENSG00000115129 | tumor protein p53 inducible protein 3                                        |
| ZNF502     | 0.60  | 2.52  | ENSG00000281448 | zinc finger protein 502                                                      |
| CLTB       | 0.60  | 6.66  | ENSG00000175416 | clathrin light chain B                                                       |
| LZTFL1     | 0.60  | 3.26  | ENSG00000163818 | leucine zipper transcription factor like 1                                   |
| EPHX1      | 0.60  | 6.87  | ENSG00000143819 | epoxide hydrolase 1                                                          |
| SNRPN      | 0.60  | 6.12  | ENSG00000128739 | small nuclear ribonucleoprotein polypeptide N                                |
| FTL        | -0.60 | 11.88 | ENSG00000087086 | ferritin light chain                                                         |
| TFAP4      | -0.60 | 4.94  | ENSG00000090447 | transcription factor AP-4                                                    |
| ZMYND19    | -0.60 | 5.68  | ENSG00000165724 | zinc finger MYND-type containing 19                                          |
| CDK14      | -0.60 | 5.91  | ENSG00000058091 | cyclin dependent kinase 14                                                   |
| TCHP       | -0.60 | 3.55  | ENSG00000139437 | trichoplein keratin filament binding                                         |
| FAT4       | -0.60 | 3.61  | ENSG00000196159 | FAT atypical cadherin 4                                                      |
| AVPI1      | -0.60 | 3.86  | ENSG00000119986 | arginine vasopressin induced 1                                               |
| TMEM97     | -0.60 | 8.16  | ENSG00000109084 | transmembrane protein 97                                                     |
| NCBP2-AS2  | -0.60 | 5.15  | ENSG00000270170 | NCBP2 antisense RNA 2 (head to head)                                         |
| AC113189.5 | -0.61 | 2.35  | ENSG00000233223 | N/A                                                                          |
| ETNK1      | -0.61 | 6.11  | ENSG00000139163 | ethanolamine kinase 1                                                        |
| OAT        | -0.61 | 3.76  | ENSG00000065154 | ornithine aminotransferase                                                   |
| MAGEA6     | -0.61 | 1.77  | ENSG00000197172 | MAGE family member A6                                                        |
| BTA1       | -0.61 | 5.66  | ENSG00000095564 | B-TFIID TATA-box binding protein associated factor 1                         |
| PHLDA2     | -0.61 | 4.98  | ENSG00000274538 | pleckstrin homology like domain family A member 2                            |
| DLC1       | -0.61 | 6.62  | ENSG00000164741 | DLC1 Rho GTPase activating protein                                           |
| C22orf29   | -0.61 | 5.35  | ENSG00000215012 | chromosome 22 open reading frame 29                                          |
| FAM83H-AS1 | -0.61 | 2.31  | ENSG00000203499 | FAM83H antisense RNA 1 (head to head)                                        |

|          |       |      |                 |                                                                    |
|----------|-------|------|-----------------|--------------------------------------------------------------------|
| SLC30A1  | -0.61 | 4.70 | ENSG00000170385 | solute carrier family 30 member 1                                  |
| ARHGAP24 | -0.61 | 2.71 | ENSG00000138639 | Rho GTPase activating protein 24                                   |
| ADAP1    | -0.61 | 3.97 | ENSG00000105963 | ArfGAP with dual PH domains 1                                      |
| RBP5     | -0.61 | 1.45 | ENSG00000139194 | retinol binding protein 5                                          |
| VN1R81P  | -0.61 | 1.92 | ENSG00000268357 | vomer nasal 1 receptor 81 pseudogene                               |
| SFXN2    | -0.61 | 3.62 | ENSG00000156398 | sideroflexin 2                                                     |
| AEN      | -0.61 | 5.25 | ENSG00000181026 | apoptosis enhancing nuclease                                       |
| IMP3     | -0.61 | 5.94 | ENSG00000177971 | IMP3, U3 small nucleolar<br>ribonucleoprotein                      |
| TRABD    | -0.61 | 6.04 | ENSG00000170638 | TraB domain containing                                             |
| PIAS2    | -0.61 | 4.23 | ENSG00000078043 | protein inhibitor of activated STAT 2                              |
| EMC6     | -0.61 | 2.23 | ENSG00000127774 | ER membrane protein complex subunit 6                              |
| NLE1     | -0.61 | 5.36 | ENSG00000073536 | notchless homolog 1                                                |
| PRKDC    | -0.61 | 9.78 | ENSG00000253729 | protein kinase, DNA-activated, catalytic<br>polypeptide            |
| GAMT     | -0.61 | 6.40 | ENSG00000130005 | guanidinoacetate N-methyltransferase                               |
| PLXNA1   | -0.61 | 8.02 | ENSG00000114554 | plexin A1                                                          |
| BCYRN1   | -0.61 | 1.04 | ENSG00000236824 | brain cytoplasmic RNA 1                                            |
| DPF3     | -0.61 | 1.04 | ENSG00000205683 | double PHD fingers 3                                               |
| TSR1     | -0.61 | 6.84 | ENSG00000167721 | TSR1, ribosome maturation factor                                   |
| TIMM8A   | -0.62 | 2.78 | ENSG00000126953 | translocase of inner mitochondrial<br>membrane 8 homolog A (yeast) |
| ABHD16A  | -0.62 | 1.57 | ENSG00000230475 | abhydrolase domain containing 16A                                  |
| SNHG6    | -0.62 | 4.04 | ENSG00000245910 | small nucleolar RNA host gene 6                                    |
| IL17RE   | -0.62 | 2.13 | ENSG00000163701 | interleukin 17 receptor E                                          |
| TMEM164  | -0.62 | 5.54 | ENSG00000157600 | transmembrane protein 164                                          |
| EEF1DP1  | -0.62 | 1.29 | ENSG00000228887 | eukaryotic translation elongation factor 1<br>delta pseudogene 1   |
| ASGR1    | -0.62 | 6.89 | ENSG00000141505 | asialoglycoprotein receptor 1                                      |
| ZFP69B   | -0.62 | 1.74 | ENSG00000187801 | ZFP69 zinc finger protein B                                        |
| MBLAC2   | -0.62 | 2.08 | ENSG00000176055 | metallo-beta-lactamase domain<br>containing 2                      |
| CHCHD5   | -0.62 | 3.80 | ENSG00000125611 | coiled-coil-helix-coiled-coil-helix<br>domain containing 5         |
| KATNB1   | -0.62 | 4.94 | ENSG00000140854 | katanin regulatory subunit B1                                      |
| OPN3     | -0.62 | 5.07 | ENSG00000054277 | opsin 3                                                            |
| MDN1     | -0.62 | 7.23 | ENSG00000112159 | midasin AAA ATPase 1                                               |

|              |       |       |                 |                                                               |
|--------------|-------|-------|-----------------|---------------------------------------------------------------|
| WDR12        | -0.62 | 5.96  | ENSG00000138442 | WD repeat domain 12                                           |
| C1orf106     | -0.62 | 5.89  | ENSG00000163362 | chromosome 1 open reading frame 106                           |
| FOXN2        | -0.62 | 5.30  | ENSG00000170802 | forkhead box N2                                               |
| AC009403.2   | -0.63 | 1.61  | ENSG00000216895 | N/A                                                           |
| COL4A1       | -0.63 | 1.61  | ENSG00000187498 | collagen type IV alpha 1 chain                                |
| BMP2         | -0.63 | 6.54  | ENSG00000125845 | bone morphogenetic protein 2                                  |
| GSTZ1        | -0.63 | 2.35  | ENSG00000100577 | glutathione S-transferase zeta 1                              |
| NDUFA4       | -0.63 | 4.91  | ENSG00000123545 | NADH:ubiquinone oxidoreductase<br>complex assembly factor 4   |
| ONECUT1      | -0.63 | 4.94  | ENSG00000169856 | one cut homeobox 1                                            |
| DIS3L        | -0.63 | 4.39  | ENSG00000166938 | DIS3 like exosome 3'-5' exoribonuclease                       |
| DDX21        | -0.63 | 7.89  | ENSG00000165732 | DExD-box helicase 21                                          |
| CLDN1        | -0.63 | 10.75 | ENSG00000163347 | claudin 1                                                     |
| EBPL         | -0.63 | 3.62  | ENSG00000123179 | emopamil binding protein like                                 |
| PRDM5        | -0.63 | 3.41  | ENSG00000138738 | PR/SET domain 5                                               |
| GSTO2        | -0.63 | 2.30  | ENSG00000065621 | glutathione S-transferase omega 2                             |
| ARTN         | -0.63 | 1.54  | ENSG00000117407 | artemin                                                       |
| CXCR4        | -0.63 | 4.85  | ENSG00000121966 | C-X-C motif chemokine receptor 4                              |
| ARRDC3       | -0.63 | 2.88  | ENSG00000113369 | arrestin domain containing 3                                  |
| RBM47        | -0.63 | 5.37  | ENSG00000163694 | RNA binding motif protein 47                                  |
| CTA-221G9.11 | -0.63 | 1.71  | ENSG00000279298 | N/A                                                           |
| DGCR6        | -0.63 | 2.01  | ENSG00000183628 | DiGeorge syndrome critical region gene<br>6                   |
| SLC25A19     | -0.63 | 3.99  | ENSG00000125454 | solute carrier family 25 member 19                            |
| ALDH16A1     | -0.63 | 5.71  | ENSG00000161618 | aldehyde dehydrogenase 16 family<br>member A1                 |
| PAWR         | -0.63 | 6.45  | ENSG00000177425 | pro-apoptotic WT1 regulator                                   |
| DNAJC3-AS1   | -0.63 | 1.65  | ENSG00000247400 | DNAJC3 antisense RNA 1 (head to<br>head)                      |
| IFI27L1      | -0.64 | 2.22  | ENSG00000276880 | interferon alpha inducible protein 27 like<br>1               |
| ADCY9        | -0.64 | 6.74  | ENSG00000162104 | adenylate cyclase 9                                           |
| AC009404.2   | -0.64 | 2.62  | ENSG00000236255 | N/A                                                           |
| TTC39C       | -0.64 | 5.23  | ENSG00000168234 | tetratricopeptide repeat domain 39C                           |
| ANKS6        | -0.64 | 4.08  | ENSG00000165138 | ankyrin repeat and sterile alpha motif<br>domain containing 6 |
| UNG          | -0.64 | 6.04  | ENSG00000076248 | uracil DNA glycosylase                                        |

|               |       |      |                 |                                                                   |
|---------------|-------|------|-----------------|-------------------------------------------------------------------|
| WWC2          | -0.64 | 6.44 | ENSG00000151718 | WW and C2 domain containing 2                                     |
| ALS2CL        | -0.64 | 2.29 | ENSG00000178038 | ALS2 C-terminal like                                              |
| RAB17         | -0.64 | 6.30 | ENSG00000124839 | RAB17, member RAS oncogene family                                 |
| NOL6          | -0.64 | 6.39 | ENSG00000165271 | nucleolar protein 6                                               |
| SNTB1         | -0.64 | 5.69 | ENSG00000172164 | syntrophin beta 1                                                 |
| SMIM4         | -0.64 | 2.81 | ENSG00000168273 | small integral membrane protein 4                                 |
| DIP2A         | -0.64 | 6.27 | ENSG00000160305 | disco interacting protein 2 homolog A                             |
| KCTD21-AS1    | -0.64 | 1.39 | ENSG00000246174 | KCTD21 antisense RNA 1                                            |
| MIXL1         | -0.64 | 1.39 | ENSG00000185155 | Mix paired-like homeobox                                          |
| SLC25A42      | -0.64 | 5.02 | ENSG00000181035 | solute carrier family 25 member 42                                |
| HDAC4         | -0.64 | 4.51 | ENSG00000068024 | histone deacetylase 4                                             |
| ADCY3         | -0.64 | 2.97 | ENSG00000138031 | adenylate cyclase 3                                               |
| PARVB         | -0.64 | 5.49 | ENSG00000188677 | parvin beta                                                       |
| ATF5          | -0.64 | 5.31 | ENSG00000169136 | activating transcription factor 5                                 |
| ARMC6         | -0.64 | 6.54 | ENSG00000105676 | armadillo repeat containing 6                                     |
| UAP1L1        | -0.64 | 5.96 | ENSG00000197355 | UDP-N-acetylglucosamine<br>pyrophosphorylase 1 like 1             |
| CCDC134       | -0.64 | 3.18 | ENSG00000100147 | coiled-coil domain containing 134                                 |
| RP11-958N24.1 | -0.64 | 2.07 | ENSG00000281965 | N/A                                                               |
| PDE4D         | -0.65 | 4.57 | ENSG00000113448 | phosphodiesterase 4D                                              |
| PRPF4         | -0.65 | 5.71 | ENSG00000136875 | pre-mRNA processing factor 4                                      |
| DPH2          | -0.65 | 5.49 | ENSG00000132768 | DPH2 homolog                                                      |
| SNHG9         | -0.65 | 1.06 | ENSG00000255198 | small nucleolar RNA host gene 9                                   |
| APOC3         | -0.65 | 3.13 | ENSG00000110245 | apolipoprotein C3                                                 |
| ALG10B        | -0.65 | 2.34 | ENSG00000175548 | ALG10B, alpha-1,2-glucosyltransferase                             |
| NIPSNAP3A     | -0.65 | 4.00 | ENSG00000136783 | nipsnap homolog 3A                                                |
| FCF1P2        | -0.65 | 1.22 | ENSG00000228638 | FCF1 pseudogene 2                                                 |
| HNRNPKP4      | -0.65 | 1.22 | ENSG00000243547 | heterogeneous nuclear ribonucleoprotein<br>K pseudogene 4         |
| PSMG4         | -0.65 | 3.71 | ENSG00000180822 | proteasome assembly chaperone 4                                   |
| IGSF9         | -0.65 | 1.55 | ENSG00000085552 | immunoglobulin superfamily member 9                               |
| TGM2          | -0.65 | 4.53 | ENSG00000198959 | transglutaminase 2                                                |
| AJUBA         | -0.65 | 7.21 | ENSG00000129474 | ajuba LIM protein                                                 |
| SHMT2         | -0.65 | 7.57 | ENSG00000182199 | serine hydroxymethyltransferase 2                                 |
| OBSCN         | -0.66 | 2.92 | ENSG00000154358 | obscurin, cytoskeletal calmodulin and<br>titin-interacting RhoGEF |
| HYAL3         | -0.66 | 2.43 | ENSG00000186792 | hyaluronoglucosaminidase 3                                        |

|            |       |       |                 |                                                            |
|------------|-------|-------|-----------------|------------------------------------------------------------|
| CPNE7      | -0.66 | 4.53  | ENSG00000178773 | copine 7                                                   |
| ANKMY1     | -0.66 | 4.22  | ENSG00000144504 | ankyrin repeat and MYND domain containing 1                |
| UHRF1BP1L  | -0.66 | 5.06  | ENSG00000111647 | UHRF1 binding protein 1 like                               |
| GNPNAT1    | -0.66 | 5.22  | ENSG00000100522 | glucosamine-phosphate N-acetyltransferase 1                |
| DOHH       | -0.66 | 5.66  | ENSG00000129932 | deoxyhypusine hydroxylase/monooxygenase                    |
| SHPRH      | -0.66 | 4.42  | ENSG00000146414 | SNF2 histone linker PHD RING helicase                      |
| CDK5R1     | -0.66 | 3.73  | ENSG00000176749 | cyclin dependent kinase 5 regulatory subunit 1             |
| ISPD       | -0.66 | 2.28  | ENSG00000214960 | isoprenoid synthase domain containing                      |
| PROC       | -0.66 | 4.17  | ENSG00000115718 | protein C, inactivator of coagulation factors Va and VIIIa |
| MZT2A      | -0.66 | 5.06  | ENSG00000173272 | mitotic spindle organizing protein 2A                      |
| STARD4     | -0.66 | 5.29  | ENSG00000164211 | StAR related lipid transfer domain containing 4            |
| LYPLA1     | -0.66 | 5.78  | ENSG00000120992 | lysophospholipase 1                                        |
| PNPLA3     | -0.66 | 4.70  | ENSG00000100344 | patatin like phospholipase domain containing 3             |
| RBM15      | -0.66 | 4.80  | ENSG00000162775 | RNA binding motif protein 15                               |
| AC010761.8 | -0.66 | 1.95  | ENSG00000264577 | N/A                                                        |
| ELMO3      | -0.66 | 1.95  | ENSG00000102890 | engulfment and cell motility 3                             |
| C8orf82    | -0.66 | 5.14  | ENSG00000213563 | chromosome 8 open reading frame 82                         |
| DHX37      | -0.66 | 6.34  | ENSG00000150990 | DEAH-box helicase 37                                       |
| PDHB       | -0.66 | 5.03  | ENSG00000168291 | pyruvate dehydrogenase (lipoamide) beta                    |
| GLS2       | -0.66 | 1.70  | ENSG00000135423 | glutaminase 2                                              |
| PLK3       | -0.67 | 3.22  | ENSG00000173846 | polo like kinase 3                                         |
| KRT8       | -0.67 | 10.14 | ENSG00000170421 | keratin 8                                                  |
| ZNF316     | -0.67 | 4.86  | ENSG00000205903 | zinc finger protein 316                                    |
| ESRP2      | -0.67 | 6.42  | ENSG00000103067 | epithelial splicing regulatory protein 2                   |
| PRR5       | -0.67 | 4.04  | ENSG00000186654 | proline rich 5                                             |
| FDFT1      | -0.67 | 7.89  | ENSG00000079459 | farnesyl-diphosphate farnesyltransferase 1                 |
| MID1IP1    | -0.67 | 5.24  | ENSG00000165175 | MID1 interacting protein 1                                 |
| KRT15      | -0.67 | 1.52  | ENSG00000171346 | keratin 15                                                 |

|           |       |       |                 |                                                                     |
|-----------|-------|-------|-----------------|---------------------------------------------------------------------|
| NAV3      | -0.67 | 1.02  | ENSG00000067798 | neuron navigator 3                                                  |
| PLCXD2    | -0.67 | 1.02  | ENSG00000240891 | phosphatidylinositol specific phospholipase C X domain containing 2 |
| EGLN3     | -0.67 | 3.75  | ENSG00000129521 | egl-9 family hypoxia inducible factor 3                             |
| MAMLD1    | -0.67 | 5.79  | ENSG0000013619  | mastermind like domain containing 1                                 |
| FBXL15    | -0.67 | 2.49  | ENSG00000107872 | F-box and leucine rich repeat protein 15                            |
| CELF1     | -0.67 | 7.03  | ENSG00000149187 | CUGBP, Elav-like family member 1                                    |
| RUSC1-AS1 | -0.67 | 3.98  | ENSG00000225855 | RUSC1 antisense RNA 1                                               |
| SEH1L     | -0.67 | 5.44  | ENSG00000085415 | SEH1 like nucleoporin                                               |
| SOCS7     | -0.67 | 3.73  | ENSG00000274229 | suppressor of cytokine signaling 7                                  |
| PITPNM2   | -0.67 | 3.40  | ENSG00000090975 | phosphatidylinositol transfer protein membrane associated 2         |
| C1orf210  | -0.67 | 3.26  | ENSG00000253313 | chromosome 1 open reading frame 210                                 |
| TSNARE1   | -0.67 | 2.46  | ENSG00000171045 | t-SNARE domain containing 1                                         |
| ACSS2     | -0.67 | 4.87  | ENSG00000131069 | acyl-CoA synthetase short-chain family member 2                     |
| ADM5      | -0.67 | 2.52  | ENSG00000224420 | adrenomedullin 5 (putative)                                         |
| FKBP5     | -0.67 | 6.03  | ENSG00000096060 | FK506 binding protein 5                                             |
| NRP1      | -0.67 | 6.96  | ENSG00000099250 | neuropilin 1                                                        |
| EIF4EBP1  | -0.68 | 6.99  | ENSG00000187840 | eukaryotic translation initiation factor 4E binding protein 1       |
| PM20D2    | -0.68 | 5.90  | ENSG00000146281 | peptidase M20 domain containing 2                                   |
| PRMT3     | -0.68 | 5.03  | ENSG00000185238 | protein arginine methyltransferase 3                                |
| POLR3E    | -0.68 | 6.04  | ENSG00000058600 | RNA polymerase III subunit E                                        |
| FRY       | -0.68 | 5.52  | ENSG00000073910 | FRY microtubule binding protein                                     |
| AFF1      | -0.68 | 5.65  | ENSG00000172493 | AF4/FMR2 family member 1                                            |
| IL17D     | -0.68 | 2.73  | ENSG00000172458 | interleukin 17D                                                     |
| SCD       | -0.68 | 10.18 | ENSG00000099194 | stearoyl-CoA desaturase                                             |
| ARID5A    | -0.68 | 4.78  | ENSG00000196843 | AT-rich interaction domain 5A                                       |
| QTRT1     | -0.68 | 4.85  | ENSG00000213339 | queuine tRNA-ribosyltransferase catalytic subunit 1                 |
| MAF       | -0.68 | 3.35  | ENSG00000178573 | MAF bZIP transcription factor                                       |
| POLR3G    | -0.68 | 2.92  | ENSG00000113356 | RNA polymerase III subunit G                                        |
| SMCR8     | -0.68 | 5.27  | ENSG00000176994 | Smith-Magenis syndrome chromosome region, candidate 8               |
| ACLY      | -0.68 | 9.34  | ENSG00000131473 | ATP citrate lyase                                                   |

|               |       |      |                 |                                                                         |
|---------------|-------|------|-----------------|-------------------------------------------------------------------------|
| PI4KAP1       | -0.68 | 1.78 | ENSG00000274602 | phosphatidylinositol 4-kinase alpha pseudogene 1                        |
| DHCR7         | -0.68 | 7.47 | ENSG00000172893 | 7-dehydrocholesterol reductase                                          |
| TRMT61A       | -0.68 | 4.98 | ENSG00000166166 | tRNA methyltransferase 61A                                              |
| CTD-2196E14.9 | -0.68 | 3.53 | ENSG00000260482 | N/A                                                                     |
| RP11-424C20.2 | -0.68 | 1.87 | ENSG00000256663 | N/A                                                                     |
| SNCG          | -0.68 | 2.44 | ENSG00000173267 | synuclein gamma                                                         |
| UGDH          | -0.68 | 7.65 | ENSG00000109814 | UDP-glucose 6-dehydrogenase                                             |
| FMR1          | -0.68 | 5.36 | ENSG00000102081 | fragile X mental retardation 1                                          |
| FAM207A       | -0.68 | 4.46 | ENSG00000160256 | family with sequence similarity 207 member A                            |
| KCNJ11        | -0.68 | 1.37 | ENSG00000187486 | potassium voltage-gated channel subfamily J member 11                   |
| POLR1B        | -0.68 | 6.33 | ENSG00000125630 | RNA polymerase I subunit B                                              |
| ST3GAL5       | -0.68 | 3.50 | ENSG00000115525 | ST3 beta-galactoside alpha-2,3-sialyltransferase 5                      |
| TRAP1         | -0.68 | 6.54 | ENSG00000126602 | TNF receptor associated protein 1                                       |
| KHK           | -0.69 | 2.91 | ENSG00000138030 | ketoheokinase                                                           |
| DUSP5         | -0.69 | 2.40 | ENSG00000138166 | dual specificity phosphatase 5                                          |
| AIMP2         | -0.69 | 6.12 | ENSG00000106305 | aminoacyl tRNA synthetase complex interacting multifunctional protein 2 |
| PAQR9         | -0.69 | 5.41 | ENSG00000188582 | progesterin and adipoQ receptor family member 9                         |
| PNP           | -0.69 | 6.27 | ENSG00000198805 | purine nucleoside phosphorylase                                         |
| SLC1A5        | -0.69 | 7.96 | ENSG00000105281 | solute carrier family 1 member 5                                        |
| IDI1          | -0.69 | 6.53 | ENSG00000067064 | isopentenyl-diphosphate delta isomerase 1                               |
| CYP7B1        | -0.69 | 3.17 | ENSG00000172817 | cytochrome P450 family 7 subfamily B member 1                           |
| MAFK          | -0.69 | 5.84 | ENSG00000198517 | MAF bZIP transcription factor K                                         |
| LSM11         | -0.69 | 3.44 | ENSG00000155858 | LSM11, U7 small nuclear RNA associated                                  |
| YOD1          | -0.69 | 5.89 | ENSG00000180667 | YOD1 deubiquitinase                                                     |
| PRR22         | -0.69 | 2.81 | ENSG00000212123 | proline rich 22                                                         |
| SMC5          | -0.69 | 5.89 | ENSG00000198887 | structural maintenance of chromosomes 5                                 |



|               |       |      |                 |                                                                      |
|---------------|-------|------|-----------------|----------------------------------------------------------------------|
| FOXA3         | -0.69 | 6.21 | ENSG00000170608 | forkhead box A3                                                      |
| APOH          | -0.69 | 7.89 | ENSG00000091583 | apolipoprotein H                                                     |
| SLC30A10      | -0.69 | 4.72 | ENSG00000196660 | solute carrier family 30 member 10                                   |
| GNB4          | -0.69 | 3.70 | ENSG00000114450 | G protein subunit beta 4                                             |
| PPM1L         | -0.69 | 4.43 | ENSG00000163590 | protein phosphatase, Mg <sup>2+</sup> /Mn <sup>2+</sup> dependent 1L |
| GCH1          | -0.69 | 4.52 | ENSG00000131979 | GTP cyclohydrolase 1                                                 |
| EXPH5         | -0.69 | 2.68 | ENSG00000110723 | exophilin 5                                                          |
| SLC7A6OS      | -0.69 | 2.87 | ENSG00000103061 | solute carrier family 7 member 6 opposite strand                     |
| TMEM170B      | -0.70 | 4.54 | ENSG00000205269 | transmembrane protein 170B                                           |
| SCML1         | -0.70 | 4.55 | ENSG00000047634 | sex comb on midleg-like 1 (Drosophila)                               |
| AC007405.6    | -0.70 | 2.28 | ENSG00000239467 | N/A                                                                  |
| MON1A         | -0.70 | 4.10 | ENSG00000164077 | MON1 homolog A, secretory trafficking associated                     |
| SLC23A2       | -0.70 | 6.34 | ENSG00000089057 | solute carrier family 23 member 2                                    |
| LRP3          | -0.70 | 6.77 | ENSG00000130881 | LDL receptor related protein 3                                       |
| CDS1          | -0.70 | 2.71 | ENSG00000163624 | CDP-diacylglycerol synthase 1                                        |
| TTLL11        | -0.70 | 1.34 | ENSG00000175764 | tubulin tyrosine ligase like 11                                      |
| ZIC4          | -0.70 | 3.54 | ENSG00000174963 | Zic family member 4                                                  |
| P2RY11        | -0.70 | 3.09 | ENSG00000244165 | purinergic receptor P2Y11                                            |
| ENTPD1-AS1    | -0.70 | 2.37 | ENSG00000226688 | ENTPD1 antisense RNA 1                                               |
| WDR35         | -0.70 | 4.46 | ENSG00000118965 | WD repeat domain 35                                                  |
| RP11-500C11.3 | -0.70 | 4.24 | ENSG00000272269 | N/A                                                                  |
| ADAT3         | -0.70 | 3.46 | ENSG00000213638 | adenosine deaminase, tRNA specific 3                                 |
| MSMO1         | -0.71 | 6.19 | ENSG00000052802 | methylsterol monooxygenase 1                                         |
| KBTBD8        | -0.71 | 2.00 | ENSG00000163376 | kelch repeat and BTB domain containing 8                             |
| ACACB         | -0.71 | 1.92 | ENSG00000076555 | acetyl-CoA carboxylase beta                                          |
| SPAST         | -0.71 | 4.18 | ENSG00000021574 | spastin                                                              |
| PPAT          | -0.71 | 6.30 | ENSG00000128059 | phosphoribosyl pyrophosphate amidotransferase                        |
| CASC10        | -0.71 | 1.82 | ENSG00000204682 | cancer susceptibility candidate 10                                   |
| CCDC80        | -0.71 | 4.04 | ENSG00000091986 | coiled-coil domain containing 80                                     |
| GLIS3         | -0.71 | 5.85 | ENSG00000107249 | GLIS family zinc finger 3                                            |
| NARS2         | -0.71 | 4.77 | ENSG00000137513 | asparaginyl-tRNA synthetase 2, mitochondrial (putative)              |

|         |       |       |                 |                                                          |
|---------|-------|-------|-----------------|----------------------------------------------------------|
| SDCCAG3 | -0.71 | 6.88  | ENSG00000165689 | serologically defined colon cancer antigen 3             |
| CEBPG   | -0.71 | 6.92  | ENSG00000153879 | CCAAT/enhancer binding protein gamma                     |
| RNASEH1 | -0.71 | 3.70  | ENSG00000171865 | ribonuclease H1                                          |
| CHCHD10 | -0.71 | 5.26  | ENSG00000273607 | coiled-coil-helix-coiled-coil-helix domain containing 10 |
| NTMT1   | -0.71 | 5.02  | ENSG00000148335 | N-terminal Xaa-Pro-Lys N-methyltransferase 1             |
| SOSTDC1 | -0.71 | 3.01  | ENSG00000171243 | sclerostin domain containing 1                           |
| CRIM1   | -0.71 | 6.42  | ENSG00000277354 | cysteine rich transmembrane BMP regulator 1              |
| NF1     | -0.71 | 7.26  | ENSG00000196712 | neurofibromin 1                                          |
| NUDT6   | -0.71 | 1.10  | ENSG00000170917 | nudix hydrolase 6                                        |
| ACTR3B  | -0.71 | 2.74  | ENSG00000133627 | ARP3 actin related protein 3 homolog B                   |
| PPAN    | -0.72 | 3.12  | ENSG00000130810 | peter pan homolog (Drosophila)                           |
| PET117  | -0.72 | 1.66  | ENSG00000232838 | PET117 homolog                                           |
| MFSD3   | -0.72 | 5.14  | ENSG00000167700 | major facilitator superfamily domain containing 3        |
| CLTCL1  | -0.72 | 5.21  | ENSG00000070371 | clathrin heavy chain like 1                              |
| EPS8L1  | -0.72 | 3.04  | ENSG00000131037 | EPS8 like 1                                              |
| MTG1    | -0.72 | 3.82  | ENSG00000148824 | mitochondrial ribosome associated GTPase 1               |
| CHCHD4  | -0.72 | 4.48  | ENSG00000163528 | coiled-coil-helix-coiled-coil-helix domain containing 4  |
| EEF2    | -0.72 | 11.88 | ENSG00000167658 | eukaryotic translation elongation factor 2               |
| YDJC    | -0.72 | 5.57  | ENSG00000161179 | YdjC homolog (bacterial)                                 |
| SLC5A3  | -0.72 | 5.82  | ENSG00000198743 | solute carrier family 5 member 3                         |
| E2F7    | -0.72 | 5.12  | ENSG00000165891 | E2F transcription factor 7                               |
| PGS1    | -0.72 | 4.91  | ENSG00000087157 | phosphatidylglycerophosphate synthase 1                  |
| PEBP1   | -0.72 | 7.99  | ENSG00000089220 | phosphatidylethanolamine binding protein 1               |
| ODC1    | -0.72 | 7.18  | ENSG00000115758 | ornithine decarboxylase 1                                |
| LYST    | -0.72 | 3.88  | ENSG00000143669 | lysosomal trafficking regulator                          |
| CCDC85B | -0.72 | 4.07  | ENSG00000175602 | coiled-coil domain containing 85B                        |
| ALOX12  | -0.72 | 1.59  | ENSG00000108839 | arachidonate 12-lipoxygenase, 12S type                   |

|            |       |      |                 |                                                        |
|------------|-------|------|-----------------|--------------------------------------------------------|
| PRR7       | -0.72 | 2.75 | ENSG00000131188 | proline rich 7, synaptic                               |
| RSAD1      | -0.72 | 4.54 | ENSG00000136444 | radical S-adenosyl methionine domain containing 1      |
| DDX31      | -0.72 | 5.42 | ENSG00000125485 | DEAD-box helicase 31                                   |
| ANKRD16    | -0.72 | 2.57 | ENSG00000134461 | ankyrin repeat domain 16                               |
| PHLDB2     | -0.73 | 6.72 | ENSG00000144824 | pleckstrin homology like domain family B member 2      |
| FAM173B    | -0.73 | 4.22 | ENSG00000150756 | family with sequence similarity 173 member B           |
| LRRC58     | -0.73 | 6.46 | ENSG00000163428 | leucine rich repeat containing 58                      |
| AGRN       | -0.73 | 9.33 | ENSG00000188157 | agrin                                                  |
| UNKL       | -0.73 | 5.03 | ENSG00000059145 | unkempt family like zinc finger                        |
| PPIF       | -0.73 | 6.76 | ENSG00000108179 | peptidylprolyl isomerase F                             |
| PLD6       | -0.73 | 2.59 | ENSG00000179598 | phospholipase D family member 6                        |
| POMK       | -0.73 | 1.96 | ENSG00000185900 | protein-O-mannose kinase                               |
| CAPN10-AS1 | -0.73 | 1.35 | ENSG00000260942 | CAPN10 antisense RNA 1 (head to head)                  |
| UHRF1      | -0.73 | 6.10 | ENSG00000276043 | ubiquitin like with PHD and ring finger domains 1      |
| C8orf76    | -0.73 | 1.64 | ENSG00000189376 | chromosome 8 open reading frame 76                     |
| HMGCR      | -0.73 | 7.66 | ENSG00000113161 | 3-hydroxy-3-methylglutaryl-CoA reductase               |
| ARHGEF26   | -0.73 | 5.83 | ENSG00000114790 | Rho guanine nucleotide exchange factor 26              |
| ACACA      | -0.73 | 7.58 | ENSG00000278540 | acetyl-CoA carboxylase alpha                           |
| ASS1       | -0.73 | 5.38 | ENSG00000130707 | argininosuccinate synthase 1                           |
| AC093673.5 | -0.73 | 2.49 | ENSG00000232533 | N/A                                                    |
| MNX1       | -0.74 | 3.33 | ENSG00000130675 | motor neuron and pancreas homeobox 1                   |
| DCP2       | -0.74 | 5.98 | ENSG00000172795 | decapping mRNA 2                                       |
| DCAF4      | -0.74 | 2.57 | ENSG00000119599 | DDB1 and CUL4 associated factor 4                      |
| SYDE1      | -0.74 | 5.56 | ENSG00000105137 | synapse defective Rho GTPase homolog 1                 |
| BLOC1S4    | -0.74 | 3.95 | ENSG00000186222 | biogenesis of lysosomal organelles complex 1 subunit 4 |
| PUS7       | -0.74 | 5.43 | ENSG00000091127 | pseudouridylate synthase 7 (putative)                  |
| LIPC       | -0.74 | 5.33 | ENSG00000166035 | lipase C, hepatic type                                 |
| TRAPPC6A   | -0.74 | 2.39 | ENSG00000007255 | trafficking protein particle complex 6A                |

|               |       |      |                 |                                                           |
|---------------|-------|------|-----------------|-----------------------------------------------------------|
| UTP20         | -0.74 | 6.38 | ENSG00000120800 | UTP20, small subunit processome component                 |
| TFDP1         | -0.74 | 8.35 | ENSG00000198176 | transcription factor Dp-1                                 |
| NR2C2AP       | -0.74 | 3.85 | ENSG00000184162 | nuclear receptor 2C2 associated protein                   |
| TSPAN4        | -0.74 | 6.03 | ENSG00000214063 | tetraspanin 4                                             |
| RRP12         | -0.74 | 6.08 | ENSG00000052749 | ribosomal RNA processing 12 homolog                       |
| RARRES2       | -0.74 | 5.32 | ENSG00000106538 | retinoic acid receptor responder 2                        |
| CDC25A        | -0.74 | 5.63 | ENSG00000164045 | cell division cycle 25A                                   |
| MIR17HG       | -0.75 | 3.58 | ENSG00000215417 | miR-17-92a-1 cluster host gene                            |
| APOM          | -0.75 | 3.28 | ENSG00000227567 | apolipoprotein M                                          |
| FBXL6         | -0.75 | 4.90 | ENSG00000182325 | F-box and leucine rich repeat protein 6                   |
| NSDHL         | -0.75 | 6.07 | ENSG00000147383 | NAD(P) dependent steroid dehydrogenase-like               |
| PWP2          | -0.75 | 6.14 | ENSG00000241945 | PWP2 periodic tryptophan protein homolog (yeast)          |
| NDUFS7        | -0.75 | 5.66 | ENSG00000115286 | NADH:ubiquinone oxidoreductase core subunit S7            |
| RGS20         | -0.75 | 1.32 | ENSG00000147509 | regulator of G-protein signaling 20                       |
| NPM3          | -0.75 | 4.99 | ENSG00000107833 | nucleophosmin/nucleoplasm 3                               |
| WDR81         | -0.75 | 6.44 | ENSG00000167716 | WD repeat domain 81                                       |
| MVK           | -0.75 | 5.33 | ENSG00000110921 | mevalonate kinase                                         |
| RP13-1032I1.7 | -0.75 | 1.65 | ENSG00000262049 | N/A                                                       |
| ZNF281        | -0.75 | 7.36 | ENSG00000162702 | zinc finger protein 281                                   |
| ITPRIP        | -0.76 | 3.26 | ENSG00000148841 | inositol 1,4,5-trisphosphate receptor interacting protein |
| SLC20A2       | -0.76 | 7.46 | ENSG00000168575 | solute carrier family 20 member 2                         |
| NPAS3         | -0.76 | 1.37 | ENSG00000151322 | neuronal PAS domain protein 3                             |
| ZNF8          | -0.76 | 1.37 | ENSG00000278129 | zinc finger protein 8                                     |
| POLR1E        | -0.76 | 4.63 | ENSG00000137054 | RNA polymerase I subunit E                                |
| ZHX1          | -0.76 | 6.36 | ENSG00000165156 | zinc fingers and homeoboxes 1                             |
| AC004967.7    | -0.76 | 1.54 | ENSG00000243554 | N/A                                                       |
| DUS3L         | -0.76 | 5.66 | ENSG00000141994 | dihydrouridine synthase 3 like                            |
| SLC7A2        | -0.76 | 6.83 | ENSG00000003989 | solute carrier family 7 member 2                          |
| ANXA3         | -0.76 | 6.99 | ENSG00000138772 | annexin A3                                                |
| ZNF714        | -0.76 | 5.04 | ENSG00000160352 | zinc finger protein 714                                   |
| DGKD          | -0.76 | 5.69 | ENSG00000280873 | diacylglycerol kinase delta                               |

|               |       |      |                 |                                                                             |
|---------------|-------|------|-----------------|-----------------------------------------------------------------------------|
| PAM16         | -0.76 | 1.58 | ENSG00000217930 | presequence translocase associated motor 16 homolog                         |
| ATP6V1E2      | -0.76 | 1.86 | ENSG00000250565 | ATPase H <sup>+</sup> transporting V1 subunit E2                            |
| FTLP3         | -0.76 | 2.77 | ENSG00000226608 | ferritin light chain pseudogene 3                                           |
| TMEM160       | -0.77 | 4.03 | ENSG00000130748 | transmembrane protein 160                                                   |
| CD3EAP        | -0.77 | 3.24 | ENSG00000117877 | CD3e molecule associated protein                                            |
| DNAJA3        | -0.77 | 6.39 | ENSG00000276726 | DnaJ heat shock protein family (Hsp40) member A3                            |
| RAP2B         | -0.77 | 6.56 | ENSG00000181467 | RAP2B, member of RAS oncogene family                                        |
| GCSH          | -0.77 | 2.59 | ENSG00000140905 | glycine cleavage system protein H                                           |
| JAG2          | -0.77 | 5.60 | ENSG00000184916 | jagged 2                                                                    |
| SERPIND1      | -0.77 | 6.57 | ENSG00000099937 | serpin family D member 1                                                    |
| MOSPD1        | -0.77 | 4.95 | ENSG00000101928 | motile sperm domain containing 1                                            |
| C2            | -0.77 | 2.96 | ENSG00000231543 | complement C2                                                               |
| SNHG8         | -0.77 | 4.05 | ENSG00000269893 | small nucleolar RNA host gene 8                                             |
| WDR4          | -0.78 | 4.17 | ENSG00000160193 | WD repeat domain 4                                                          |
| HIST1H2AG     | -0.78 | 1.34 | ENSG00000196787 | histone cluster 1 H2A family member g                                       |
| LYRM1         | -0.78 | 5.31 | ENSG00000102897 | LYR motif containing 1                                                      |
| WTIP          | -0.78 | 5.17 | ENSG00000142279 | Wilms tumor 1 interacting protein                                           |
| IKBKG         | -0.78 | 2.65 | ENSG00000269335 | inhibitor of kappa light polypeptide gene enhancer in B-cells, kinase gamma |
| RP11-834C11.4 | -0.78 | 5.61 | ENSG00000250742 | N/A                                                                         |
| CXCL16        | -0.78 | 6.99 | ENSG00000161921 | C-X-C motif chemokine ligand 16                                             |
| ZNF556        | -0.78 | 1.55 | ENSG00000172000 | zinc finger protein 556                                                     |
| IDH3A         | -0.78 | 3.50 | ENSG00000166411 | isocitrate dehydrogenase 3 (NAD(+)) alpha                                   |
| AAK1          | -0.78 | 4.13 | ENSG00000115977 | AP2 associated kinase 1                                                     |
| MAP3K14       | -0.78 | 3.79 | ENSG0000006062  | mitogen-activated protein kinase kinase kinase 14                           |
| CHML          | -0.78 | 5.96 | ENSG00000203668 | CHM like, Rab escort protein 2                                              |
| RAMP2-AS1     | -0.79 | 1.20 | ENSG00000197291 | RAMP2 antisense RNA 1                                                       |
| RANGRF        | -0.79 | 1.59 | ENSG00000108961 | RAN guanine nucleotide release factor                                       |
| COMTD1        | -0.79 | 3.36 | ENSG00000165644 | catechol-O-methyltransferase domain containing 1                            |
| CISH          | -0.79 | 2.49 | ENSG00000114737 | cytokine inducible SH2 containing protein                                   |

|             |       |      |                 |                                                                |
|-------------|-------|------|-----------------|----------------------------------------------------------------|
| ZNF467      | -0.79 | 1.43 | ENSG00000181444 | zinc finger protein 467                                        |
| ZNF324B     | -0.79 | 2.84 | ENSG00000249471 | zinc finger protein 324B                                       |
| URB2        | -0.79 | 5.87 | ENSG00000135763 | URB2 ribosome biogenesis 2 homolog<br>( <i>S. cerevisiae</i> ) |
| DHRS13      | -0.79 | 2.68 | ENSG00000167536 | dehydrogenase/reductase 13                                     |
| ADAMTS19    | -0.79 | 3.05 | ENSG00000145808 | ADAM metalloproteinase with<br>thrombospondin type 1 motif 19  |
| LIMK1       | -0.79 | 5.73 | ENSG00000106683 | LIM domain kinase 1                                            |
| SLC2A1      | -0.79 | 4.81 | ENSG00000117394 | solute carrier family 2 member 1                               |
| CRYM        | -0.79 | 1.25 | ENSG00000103316 | crystallin mu                                                  |
| TYSND1      | -0.79 | 4.56 | ENSG00000156521 | trypsin domain containing 1                                    |
| PYCR1       | -0.79 | 6.30 | ENSG00000183010 | pyrroline-5-carboxylate reductase 1                            |
| AMN         | -0.79 | 4.21 | ENSG00000166126 | amnion associated transmembrane<br>protein                     |
| CTB-5506.12 | -0.79 | 1.48 | ENSG00000267169 | N/A                                                            |
| SIGMAR1     | -0.79 | 6.31 | ENSG00000147955 | sigma non-opioid intracellular receptor 1                      |
| ASB9        | -0.79 | 2.63 | ENSG00000102048 | ankyrin repeat and SOCS box containing<br>9                    |
| MAK16       | -0.80 | 5.89 | ENSG00000198042 | MAK16 homolog                                                  |
| STOM        | -0.80 | 6.25 | ENSG00000148175 | stomatin                                                       |
| INSIG1      | -0.80 | 5.09 | ENSG00000186480 | insulin induced gene 1                                         |
| ZYG11A      | -0.80 | 2.82 | ENSG00000203995 | zyg-11 family member A, cell cycle<br>regulator                |
| POLR3K      | -0.80 | 3.82 | ENSG00000161980 | RNA polymerase III subunit K                                   |
| CHD9        | -0.80 | 3.52 | ENSG00000177200 | chromodomain helicase DNA binding<br>protein 9                 |
| TRIM56      | -0.80 | 4.15 | ENSG00000169871 | tripartite motif containing 56                                 |
| PCYT2       | -0.80 | 7.09 | ENSG00000185813 | phosphate cytidylyltransferase 2,<br>ethanolamine              |
| TATDN2P2    | -0.80 | 2.59 | ENSG00000218226 | TatD DNase domain containing 2<br>pseudogene 2                 |
| JAG1        | -0.80 | 4.36 | ENSG00000101384 | jagged 1                                                       |
| SLFNL1      | -0.80 | 1.10 | ENSG00000171790 | schlafen like 1                                                |
| MRPS24      | -0.80 | 1.75 | ENSG00000062582 | mitochondrial ribosomal protein S24                            |
| FAM110C     | -0.80 | 4.76 | ENSG00000184731 | family with sequence similarity 110<br>member C                |
| NUDT8       | -0.80 | 2.06 | ENSG00000167799 | nudix hydrolase 8                                              |

|          |       |      |                 |                                                           |
|----------|-------|------|-----------------|-----------------------------------------------------------|
| SCML2    | -0.81 | 3.67 | ENSG00000102098 | sex comb on midleg-like 2 (Drosophila)                    |
| PUS7L    | -0.81 | 3.92 | ENSG00000129317 | pseudouridylate synthase 7 like                           |
| PUS1     | -0.81 | 4.93 | ENSG00000177192 | pseudouridylate synthase 1                                |
| CPN2     | -0.81 | 1.79 | ENSG00000178772 | carboxypeptidase N subunit 2                              |
| AASS     | -0.81 | 3.07 | ENSG00000008311 | aminoadipate-semialdehyde synthase                        |
| FAM72D   | -0.81 | 1.16 | ENSG00000215784 | family with sequence similarity 72<br>member D            |
| ACSL3    | -0.81 | 8.56 | ENSG00000123983 | acyl-CoA synthetase long-chain family<br>member 3         |
| NOC3L    | -0.81 | 5.40 | ENSG00000173145 | NOC3 like DNA replication regulator                       |
| UGT2B4   | -0.81 | 4.22 | ENSG00000156096 | UDP glucuronosyltransferase family 2<br>member B4         |
| FBLN5    | -0.81 | 3.83 | ENSG00000140092 | fibulin 5                                                 |
| AMOT     | -0.81 | 4.53 | ENSG00000126016 | angiominin                                                |
| MYO9A    | -0.81 | 4.07 | ENSG00000066933 | myosin IXA                                                |
| SLC35E2B | -0.81 | 6.54 | ENSG00000189339 | solute carrier family 35 member E2B                       |
| BOPI     | -0.82 | 5.87 | ENSG00000261236 | block of proliferation 1                                  |
| S1PR2    | -0.82 | 2.30 | ENSG00000267534 | sphingosine-1-phosphate receptor 2                        |
| ING5     | -0.82 | 5.13 | ENSG00000168395 | inhibitor of growth family member 5                       |
| KLF11    | -0.82 | 1.73 | ENSG00000172059 | Kruppel like factor 11                                    |
| PIP4K2B  | -0.82 | 6.87 | ENSG00000276293 | phosphatidylinositol-5-phosphate 4-<br>kinase type 2 beta |
| SDC2     | -0.82 | 6.93 | ENSG00000169439 | syndecan 2                                                |
| CFD      | -0.82 | 3.16 | ENSG00000274619 | complement factor D                                       |
| TRIM71   | -0.82 | 7.13 | ENSG00000206557 | tripartite motif containing 71                            |
| TLN2     | -0.83 | 5.46 | ENSG00000171914 | talin 2                                                   |
| RASSF9   | -0.83 | 2.94 | ENSG00000198774 | Ras association domain family member<br>9                 |
| ZFHX4    | -0.83 | 6.22 | ENSG00000091656 | zinc finger homeobox 4                                    |
| SSTR5    | -0.83 | 2.16 | ENSG00000162009 | somatostatin receptor 5                                   |
| ASIC1    | -0.83 | 1.06 | ENSG00000110881 | acid sensing ion channel subunit 1                        |
| AMZ1     | -0.83 | 2.45 | ENSG00000174945 | archaelysin family metalloproteinase 1                    |
| HOXA-AS2 | -0.83 | 2.57 | ENSG00000253552 | HOXA cluster antisense RNA 2                              |
| CCDC86   | -0.83 | 6.42 | ENSG00000110104 | coiled-coil domain containing 86                          |
| ATCB10   | -0.84 | 5.19 | ENSG00000135776 | ATP binding cassette subfamily B<br>member 10             |

|            |       |       |                 |                                                         |
|------------|-------|-------|-----------------|---------------------------------------------------------|
| PHKA2      | -0.84 | 5.90  | ENSG00000044446 | phosphorylase kinase regulatory subunit alpha 2         |
| FLNB       | -0.84 | 8.53  | ENSG00000136068 | filamin B                                               |
| KNG1       | -0.84 | 4.63  | ENSG00000113889 | kininogen 1                                             |
| LIN7A      | -0.84 | 5.81  | ENSG00000111052 | lin-7 homolog A, crumbs cell polarity complex component |
| PITPNM3    | -0.84 | 5.34  | ENSG00000091622 | PITPNM family member 3                                  |
| NME3       | -0.84 | 4.00  | ENSG00000103024 | NME/NM23 nucleoside diphosphate kinase 3                |
| BOK        | -0.84 | 5.30  | ENSG00000176720 | BOK, BCL2 family apoptosis regulator                    |
| C17orf58   | -0.84 | 2.93  | ENSG00000186665 | chromosome 17 open reading frame 58                     |
| SYT7       | -0.84 | 3.70  | ENSG00000011347 | synaptotagmin 7                                         |
| SRGAP2B    | -0.84 | 1.97  | ENSG00000196369 | SLIT-ROBO Rho GTPase activating protein 2B              |
| RPS23P8    | -0.84 | 1.23  | ENSG00000230629 | ribosomal protein S23 pseudogene 8                      |
| PHYH       | -0.85 | 4.12  | ENSG00000107537 | phytanoyl-CoA 2-hydroxylase                             |
| DCHS2      | -0.85 | 3.94  | ENSG00000197410 | dachsous cadherin-related 2                             |
| RDH13      | -0.85 | 4.00  | ENSG00000274418 | retinol dehydrogenase 13                                |
| FTCD       | -0.85 | 1.34  | ENSG00000160282 | formimidoyltransferase cyclodeaminase                   |
| TMEM192    | -0.85 | 4.83  | ENSG00000170088 | transmembrane protein 192                               |
| GOLT1A     | -0.85 | 5.80  | ENSG00000174567 | golgi transport 1A                                      |
| GLCCI1     | -0.85 | 6.13  | ENSG00000106415 | glucocorticoid induced 1                                |
| FASN       | -0.86 | 10.43 | ENSG00000169710 | fatty acid synthase                                     |
| C17orf82   | -0.86 | 1.39  | ENSG00000187013 | chromosome 17 open reading frame 82                     |
| IGFBP4     | -0.86 | 1.39  | ENSG00000141753 | insulin like growth factor binding protein 4            |
| ROBO2      | -0.86 | 2.15  | ENSG00000185008 | roundabout guidance receptor 2                          |
| PKP2       | -0.86 | 6.04  | ENSG00000057294 | plakophilin 2                                           |
| AC093162.5 | -0.86 | 1.43  | ENSG00000246575 | N/A                                                     |
| MPC1       | -0.86 | 5.58  | ENSG00000060762 | mitochondrial pyruvate carrier 1                        |
| NOSTRIN    | -0.86 | 3.70  | ENSG00000163072 | nitric oxide synthase trafficking                       |
| ADCY10     | -0.86 | 3.20  | ENSG00000143199 | adenylate cyclase 10, soluble                           |
| HPX        | -0.86 | 4.73  | ENSG00000110169 | hemopexin                                               |
| P2RY2      | -0.87 | 1.52  | ENSG00000175591 | purinergic receptor P2Y2                                |
| KLHL29     | -0.87 | 5.56  | ENSG00000119771 | kelch like family member 29                             |
| NUDT17     | -0.87 | 2.93  | ENSG00000186364 | nudix hydrolase 17                                      |
| RASAL2     | -0.87 | 6.08  | ENSG00000075391 | RAS protein activator like 2                            |



|             |       |      |                 |                                                                                                      |
|-------------|-------|------|-----------------|------------------------------------------------------------------------------------------------------|
| FRRS1       | -0.87 | 4.20 | ENSG00000156869 | ferric chelate reductase 1                                                                           |
| L3HYPDH     | -0.87 | 3.52 | ENSG00000126790 | trans-L-3-hydroxyproline dehydratase                                                                 |
| NUDT14      | -0.87 | 3.55 | ENSG00000183828 | nudix hydrolase 14                                                                                   |
| SHANK2      | -0.87 | 5.00 | ENSG00000162105 | SH3 and multiple ankyrin repeat domains 2                                                            |
| CTU1        | -0.87 | 3.64 | ENSG00000142544 | cytosolic thiouridylase subunit 1                                                                    |
| SLC16A1     | -0.87 | 6.39 | ENSG00000281917 | solute carrier family 16 member 1                                                                    |
| RAPH1       | -0.87 | 2.41 | ENSG00000173166 | Ras association (RalGDS/AF-6) and pleckstrin homology domains 1                                      |
| MARS2       | -0.87 | 4.99 | ENSG00000247626 | methionyl-tRNA synthetase 2, mitochondrial                                                           |
| CD37        | -0.87 | 3.83 | ENSG00000104894 | CD37 molecule                                                                                        |
| PTAR1       | -0.88 | 6.08 | ENSG00000188647 | protein prenyltransferase alpha subunit repeat containing 1                                          |
| SULT2A1     | -0.88 | 1.99 | ENSG00000105398 | sulfotransferase family 2A member 1                                                                  |
| FDPS        | -0.88 | 7.61 | ENSG00000160752 | farnesyl diphosphate synthase                                                                        |
| SORL1       | -0.88 | 4.57 | ENSG00000137642 | sortilin related receptor 1                                                                          |
| MACROD2     | -0.88 | 1.35 | ENSG00000172264 | MACRO domain containing 2                                                                            |
| MRPS26      | -0.88 | 5.74 | ENSG00000125901 | mitochondrial ribosomal protein S26                                                                  |
| MTHFD2      | -0.88 | 6.18 | ENSG00000065911 | methylenetetrahydrofolate dehydrogenase (NADP+ dependent) 2, methenyltetrahydrofolate cyclohydrolase |
| HEG1        | -0.88 | 6.22 | ENSG00000173706 | heart development protein with EGF like domains 1                                                    |
| BDH1        | -0.88 | 2.37 | ENSG00000275544 | 3-hydroxybutyrate dehydrogenase, type 1                                                              |
| SNHG7       | -0.88 | 4.65 | ENSG00000233016 | small nucleolar RNA host gene 7                                                                      |
| MASP1       | -0.88 | 5.60 | ENSG00000127241 | mannan binding lectin serine peptidase 1                                                             |
| CGA         | -0.89 | 3.31 | ENSG00000135346 | glycoprotein hormones, alpha polypeptide                                                             |
| CYTH3       | -0.89 | 5.56 | ENSG00000008256 | cytohesin 3                                                                                          |
| IGF2-AS     | -0.89 | 2.91 | ENSG00000099869 | IGF2 antisense RNA                                                                                   |
| ADORA2A-AS1 | -0.89 | 1.04 | ENSG00000178803 | ADORA2A antisense RNA 1                                                                              |
| TLL1        | -0.89 | 1.58 | ENSG00000038295 | tolloid like 1                                                                                       |
| SESN3       | -0.89 | 5.88 | ENSG00000149212 | sestrin 3                                                                                            |
| HIST1H2BJ   | -0.89 | 1.10 | ENSG00000124635 | histone cluster 1 H2B family member j                                                                |

|              |       |      |                 |                                                                  |
|--------------|-------|------|-----------------|------------------------------------------------------------------|
| ITPKA        | -0.90 | 3.78 | ENSG00000137825 | inositol-trisphosphate 3-kinase A                                |
| HBQ1         | -0.90 | 1.22 | ENSG00000086506 | hemoglobin subunit theta 1                                       |
| CCND1        | -0.90 | 6.71 | ENSG00000110092 | cyclin D1                                                        |
| SMIM14       | -0.90 | 4.45 | ENSG00000163683 | small integral membrane protein 14                               |
| ZCCHC24      | -0.90 | 4.59 | ENSG00000165424 | zinc finger CCHC-type containing 24                              |
| AGMAT        | -0.90 | 6.33 | ENSG00000116771 | agmatinase                                                       |
| SLCO2B1      | -0.90 | 1.81 | ENSG00000137491 | solute carrier organic anion transporter family member 2B1       |
| NT5C2        | -0.90 | 5.78 | ENSG00000076685 | 5'-nucleotidase, cytosolic II                                    |
| GLDC         | -0.90 | 6.66 | ENSG00000178445 | glycine decarboxylase                                            |
| SLC7A1       | -0.91 | 6.42 | ENSG00000139514 | solute carrier family 7 member 1                                 |
| AGO2         | -0.91 | 5.34 | ENSG00000123908 | argonaute 2, RISC catalytic component                            |
| TST          | -0.91 | 4.44 | ENSG00000128311 | thiosulfate sulfurtransferase                                    |
| MTX3         | -0.91 | 3.88 | ENSG00000177034 | metaxin 3                                                        |
| HSPB8        | -0.91 | 4.03 | ENSG00000152137 | heat shock protein family B (small) member 8                     |
| WNK4         | -0.91 | 3.36 | ENSG00000126562 | WNK lysine deficient protein kinase 4                            |
| SERTAD1      | -0.91 | 2.43 | ENSG00000197019 | SERTA domain containing 1                                        |
| TNNC1        | -0.91 | 3.42 | ENSG00000114854 | troponin C1, slow skeletal and cardiac type                      |
| XXYLT1       | -0.91 | 5.82 | ENSG00000173950 | xyloside xylosyltransferase 1                                    |
| PAXIP1-AS1   | -0.91 | 2.50 | ENSG00000273344 | PAXIP1 antisense RNA 1 (head to head)                            |
| EPAS1        | -0.92 | 8.25 | ENSG00000116016 | endothelial PAS domain protein 1                                 |
| AGXT         | -0.92 | 1.79 | ENSG00000172482 | alanine-glyoxylate aminotransferase                              |
| AC011290.5   | -0.92 | 1.00 | ENSG00000236015 | N/A                                                              |
| RP11-894P9.1 | -0.92 | 1.00 | ENSG00000246451 | N/A                                                              |
| GFOD1        | -0.92 | 1.99 | ENSG00000145990 | glucose-fructose oxidoreductase domain containing 1              |
| CICP14       | -0.92 | 1.12 | ENSG00000281490 | capicua transcriptional repressor pseudogene 14                  |
| APOC2        | -0.93 | 1.23 | ENSG00000234906 | apolipoprotein C2                                                |
| TRPC4        | -0.93 | 1.23 | ENSG00000133107 | transient receptor potential cation channel subfamily C member 4 |
| CCDC85C      | -0.93 | 5.72 | ENSG00000205476 | coiled-coil domain containing 85C                                |
| HK2          | -0.93 | 7.06 | ENSG00000159399 | hexokinase 2                                                     |
| PEG10        | -0.93 | 5.27 | ENSG00000242265 | paternally expressed 10                                          |
| RGS2         | -0.93 | 5.67 | ENSG00000116741 | regulator of G-protein signaling 2                               |

|               |       |      |                 |                                                            |
|---------------|-------|------|-----------------|------------------------------------------------------------|
| BAIAP2        | -0.93 | 4.09 | ENSG00000175866 | BAI1 associated protein 2                                  |
| C2orf54       | -0.93 | 4.33 | ENSG00000172478 | chromosome 2 open reading frame 54                         |
| GULP1         | -0.93 | 4.16 | ENSG00000144366 | GULP, engulfment adaptor PTB domain containing 1           |
| GLUD1         | -0.93 | 7.34 | ENSG00000148672 | glutamate dehydrogenase 1                                  |
| ACAT2         | -0.94 | 7.01 | ENSG00000120437 | acetyl-CoA acetyltransferase 2                             |
| NUP43         | -0.94 | 5.92 | ENSG00000120253 | nucleoporin 43                                             |
| REV3L         | -0.94 | 4.68 | ENSG00000009413 | REV3 like, DNA directed polymerase zeta catalytic subunit  |
| DDIT4L        | -0.94 | 2.15 | ENSG00000145358 | DNA damage inducible transcript 4 like                     |
| MTMR4         | -0.95 | 6.25 | ENSG00000108389 | myotubularin related protein 4                             |
| CXorf57       | -0.95 | 3.00 | ENSG00000147231 | chromosome X open reading frame 57                         |
| SCN9A         | -0.95 | 6.96 | ENSG00000169432 | sodium voltage-gated channel alpha subunit 9               |
| RP11-449P15.2 | -0.95 | 3.14 | ENSG00000273151 | N/A                                                        |
| EPPK1         | -0.95 | 5.36 | ENSG00000261150 | epiplakin 1                                                |
| BCL2L14       | -0.95 | 1.02 | ENSG00000281449 | BCL2 like 14                                               |
| NAB2          | -0.95 | 4.30 | ENSG00000166886 | NGFI-A binding protein 2                                   |
| FUT9          | -0.95 | 1.20 | ENSG00000172461 | fucosyltransferase 9                                       |
| MRPL23-AS1    | -0.96 | 1.45 | ENSG00000226416 | MRPL23 antisense RNA 1                                     |
| NEU3          | -0.96 | 2.91 | ENSG00000162139 | neuraminidase 3                                            |
| MVD           | -0.96 | 6.82 | ENSG00000167508 | mevalonate diphosphate decarboxylase                       |
| FBXL18        | -0.96 | 5.31 | ENSG00000155034 | F-box and leucine rich repeat protein 18                   |
| RPS6KB1       | -0.96 | 5.54 | ENSG00000108443 | ribosomal protein S6 kinase B1                             |
| RRS1          | -0.97 | 5.07 | ENSG00000179041 | ribosome biogenesis regulator homolog                      |
| LSS           | -0.97 | 7.79 | ENSG00000281289 | lanosterol synthase (2,3-oxidosqualene-lanosterol cyclase) |
| MBP           | -0.97 | 5.58 | ENSG00000197971 | myelin basic protein                                       |
| URB1          | -0.97 | 6.22 | ENSG00000142207 | URB1 ribosome biogenesis 1 homolog (S. cerevisiae)         |
| MARC1         | -0.97 | 6.07 | ENSG00000186205 | mitochondrial amidoxime reducing component 1               |
| RNF152        | -0.97 | 2.20 | ENSG00000176641 | ring finger protein 152                                    |
| PCK2          | -0.97 | 4.35 | ENSG00000100889 | phosphoenolpyruvate carboxykinase 2, mitochondrial         |
| EDN1          | -0.97 | 4.52 | ENSG00000078401 | endothelin 1                                               |
| RP11-469A15.2 | -0.97 | 1.79 | ENSG00000230623 | N/A                                                        |

|               |       |      |                 |                                                                    |
|---------------|-------|------|-----------------|--------------------------------------------------------------------|
| C9orf40       | -0.98 | 4.05 | ENSG00000135045 | chromosome 9 open reading frame 40                                 |
| SCNN1A        | -0.98 | 1.55 | ENSG00000111319 | sodium channel epithelial 1 alpha subunit                          |
| C1orf109      | -0.98 | 3.59 | ENSG00000116922 | chromosome 1 open reading frame 109                                |
| KBTBD6        | -0.98 | 3.84 | ENSG00000165572 | kelch repeat and BTB domain containing 6                           |
| NCOA2         | -0.98 | 6.60 | ENSG00000140396 | nuclear receptor coactivator 2                                     |
| MCC           | -0.98 | 5.32 | ENSG00000171444 | mutated in colorectal cancers                                      |
| CRNDE         | -0.98 | 1.22 | ENSG00000245694 | colorectal neoplasia differentially expressed (non-protein coding) |
| P2RY1         | -0.98 | 1.22 | ENSG00000169860 | purinergic receptor P2Y1                                           |
| ORM2          | -0.98 | 3.55 | ENSG00000228278 | orosomuroid 2                                                      |
| CDH4          | -0.99 | 1.10 | ENSG00000179242 | cadherin 4                                                         |
| PDXP          | -0.99 | 1.87 | ENSG00000241360 | pyridoxal phosphatase                                              |
| ABCA1         | -0.99 | 5.06 | ENSG00000165029 | ATP binding cassette subfamily A member 1                          |
| PSAT1         | -0.99 | 7.13 | ENSG00000135069 | phosphoserine aminotransferase 1                                   |
| NQO1          | -1.00 | 3.32 | ENSG00000181019 | NAD(P)H quinone dehydrogenase 1                                    |
| SPIN4         | -1.00 | 3.66 | ENSG00000186767 | spindlin family member 4                                           |
| PCDH9         | -1.00 | 4.68 | ENSG00000184226 | protocadherin 9                                                    |
| RP11-264B17.2 | -1.01 | 1.34 | ENSG00000260853 | N/A                                                                |
| ST3GAL6       | -1.01 | 3.65 | ENSG00000064225 | ST3 beta-galactoside alpha-2,3-sialyltransferase 6                 |
| ORM1          | -1.01 | 4.93 | ENSG00000229314 | orosomuroid 1                                                      |
| MCOLN2        | -1.01 | 1.74 | ENSG00000153898 | mucolipin 2                                                        |
| CD14          | -1.02 | 1.12 | ENSG00000170458 | CD14 molecule                                                      |
| GCLM          | -1.02 | 4.69 | ENSG00000023909 | glutamate-cysteine ligase modifier subunit                         |
| SHPK          | -1.02 | 5.66 | ENSG00000197417 | sedoheptulokinase                                                  |
| NADK2         | -1.05 | 7.25 | ENSG00000152620 | NAD kinase 2, mitochondrial                                        |
| TRIP13        | -1.05 | 6.05 | ENSG00000071539 | thyroid hormone receptor interactor 13                             |
| ADCY7         | -1.05 | 3.17 | ENSG00000121281 | adenylate cyclase 7                                                |
| PROSER2       | -1.05 | 5.25 | ENSG00000148426 | proline and serine rich 2                                          |
| GPD1L         | -1.05 | 5.88 | ENSG00000152642 | glycerol-3-phosphate dehydrogenase 1-like                          |
| GNL3L         | -1.05 | 4.12 | ENSG00000130119 | G protein nucleolar 3 like                                         |
| C12orf66      | -1.06 | 2.20 | ENSG00000174206 | chromosome 12 open reading frame 66                                |

|             |       |       |                 |                                                                            |
|-------------|-------|-------|-----------------|----------------------------------------------------------------------------|
| MMP16       | -1.06 | 2.70  | ENSG00000156103 | matrix metalloproteinase 16                                                |
| KCNAB2      | -1.06 | 3.91  | ENSG00000069424 | potassium voltage-gated channel subfamily A regulatory beta subunit 2      |
| SYBU        | -1.06 | 3.13  | ENSG00000147642 | syntabulin                                                                 |
| NOC2L       | -1.06 | 7.04  | ENSG00000188976 | NOC2 like nucleolar associated transcriptional repressor                   |
| RBMS2       | -1.06 | 4.19  | ENSG00000076067 | RNA binding motif single stranded interacting protein 2                    |
| RP11-80H5.5 | -1.06 | 1.61  | ENSG00000249962 | N/A                                                                        |
| ZNF696      | -1.07 | 3.56  | ENSG00000185730 | zinc finger protein 696                                                    |
| SPSB4       | -1.07 | 2.42  | ENSG00000175093 | splA/ryanodine receptor domain and SOCS box containing 4                   |
| C1orf64     | -1.07 | 2.18  | ENSG00000183888 | chromosome 1 open reading frame 64                                         |
| MICAL2      | -1.08 | 4.90  | ENSG00000133816 | microtubule associated monooxygenase, calponin and LIM domain containing 2 |
| TXNIP       | -1.08 | 4.74  | ENSG00000265972 | thioredoxin interacting protein                                            |
| SGTB        | -1.08 | 3.15  | ENSG00000197860 | small glutamine rich tetratricopeptide repeat containing beta              |
| CCAT1       | -1.08 | 3.95  | ENSG00000247844 | colon cancer associated transcript 1 (non-protein coding)                  |
| GDA         | -1.08 | 1.38  | ENSG00000119125 | guanine deaminase                                                          |
| AIM1        | -1.08 | 4.76  | ENSG00000112297 | absent in melanoma 1                                                       |
| LGI2        | -1.08 | 3.19  | ENSG00000153012 | leucine rich repeat LGI family member 2                                    |
| CPS1        | -1.08 | 1.04  | ENSG00000021826 | carbamoyl-phosphate synthase 1                                             |
| MDGA1       | -1.08 | 1.04  | ENSG00000112139 | MAM domain containing glycosylphosphatidylinositol anchor 1                |
| KRT23       | -1.09 | 8.66  | ENSG00000108244 | keratin 23                                                                 |
| APOB        | -1.09 | 11.77 | ENSG00000084674 | apolipoprotein B                                                           |
| DTNA        | -1.09 | 5.73  | ENSG00000134769 | dystrobrevin alpha                                                         |
| APOBEC3F    | -1.09 | 2.10  | ENSG00000128394 | apolipoprotein B mRNA editing enzyme catalytic subunit 3F                  |
| ADAM11      | -1.10 | 1.49  | ENSG00000073670 | ADAM metalloproteinase domain 11                                           |
| MIR503HG    | -1.10 | 1.23  | ENSG00000223749 | MIR503 host gene                                                           |
| PDGFRB      | -1.10 | 3.00  | ENSG00000113721 | platelet derived growth factor receptor beta                               |
| CHST13      | -1.10 | 6.04  | ENSG00000180767 | carbohydrate sulfotransferase 13                                           |

|            |       |      |                 |                                                                                        |
|------------|-------|------|-----------------|----------------------------------------------------------------------------------------|
| MGAT4A     | -1.11 | 6.16 | ENSG00000071073 | mannosyl (alpha-1,3-)-glycoprotein beta-1,4-N-acetylglucosaminyltransferase, isozyme A |
| METTL3     | -1.11 | 6.03 | ENSG00000165819 | methyltransferase like 3                                                               |
| AC006273.5 | -1.11 | 1.12 | ENSG00000267530 | N/A                                                                                    |
| LRP8       | -1.12 | 3.56 | ENSG00000157193 | LDL receptor related protein 8                                                         |
| C8G        | -1.13 | 3.94 | ENSG00000176919 | complement C8 gamma chain                                                              |
| AHNAK      | -1.13 | 7.19 | ENSG00000124942 | AHNAK nucleoprotein                                                                    |
| MYO10      | -1.13 | 5.55 | ENSG00000145555 | myosin X                                                                               |
| C17orf51   | -1.14 | 2.87 | ENSG00000212719 | chromosome 17 open reading frame 51                                                    |
| REEP4      | -1.14 | 5.48 | ENSG00000168476 | receptor accessory protein 4                                                           |
| LIN28B     | -1.14 | 6.19 | ENSG00000187772 | lin-28 homolog B                                                                       |
| PDSS1      | -1.14 | 3.89 | ENSG00000148459 | prenyl (decaprenyl) diphosphate synthase, subunit 1                                    |
| AP1M2      | -1.15 | 2.68 | ENSG00000129354 | adaptor related protein complex 1 mu 2 subunit                                         |
| FAM150A    | -1.16 | 1.87 | ENSG00000196711 | family with sequence similarity 150 member A                                           |
| FAM46B     | -1.16 | 1.58 | ENSG00000158246 | family with sequence similarity 46 member B                                            |
| ABCG2      | -1.16 | 2.05 | ENSG00000118777 | ATP binding cassette subfamily G member 2 (Junior blood group)                         |
| APOOL      | -1.17 | 2.65 | ENSG00000155008 | apolipoprotein O like                                                                  |
| ZC3HAV1L   | -1.17 | 2.89 | ENSG00000146858 | zinc finger CCCH-type containing, antiviral 1 like                                     |
| NCR3LG1    | -1.17 | 2.63 | ENSG00000188211 | natural killer cell cytotoxicity receptor 3 ligand 1                                   |
| HAGHL      | -1.17 | 1.49 | ENSG00000103253 | hydroxyacylglutathione hydrolase-like                                                  |
| CEBPA-AS1  | -1.17 | 2.21 | ENSG00000267296 | CEBPA antisense RNA 1 (head to head)                                                   |
| BCAT1      | -1.17 | 5.89 | ENSG00000060982 | branched chain amino acid transaminase 1                                               |
| SLC39A5    | -1.18 | 4.02 | ENSG00000139540 | solute carrier family 39 member 5                                                      |
| CCSER1     | -1.18 | 2.49 | ENSG00000184305 | coiled-coil serine rich protein 1                                                      |
| SLC43A3    | -1.18 | 6.87 | ENSG00000134802 | solute carrier family 43 member 3                                                      |
| PLCD3      | -1.19 | 5.01 | ENSG00000161714 | phospholipase C delta 3                                                                |
| GPX2       | -1.19 | 5.90 | ENSG00000176153 | glutathione peroxidase 2                                                               |

|               |       |      |                 |                                                                  |
|---------------|-------|------|-----------------|------------------------------------------------------------------|
| VASN          | -1.19 | 4.88 | ENSG00000168140 | vasorin                                                          |
| SOWAHC        | -1.19 | 5.57 | ENSG00000198142 | sosondowah ankyrin repeat domain family member C                 |
| SKP2          | -1.20 | 7.58 | ENSG00000145604 | S-phase kinase associated protein 2                              |
| WDR66         | -1.20 | 3.83 | ENSG00000158023 | WD repeat domain 66                                              |
| CA2           | -1.20 | 1.82 | ENSG00000104267 | carbonic anhydrase 2                                             |
| FOXJ1         | -1.20 | 4.97 | ENSG00000129654 | forkhead box J1                                                  |
| AIM1L         | -1.20 | 3.44 | ENSG00000176092 | absent in melanoma 1-like                                        |
| MLXIPL        | -1.21 | 4.53 | ENSG00000009950 | MLX interacting protein like                                     |
| TTR           | -1.21 | 5.57 | ENSG00000118271 | transthyretin                                                    |
| FGF19         | -1.21 | 3.71 | ENSG00000162344 | fibroblast growth factor 19                                      |
| CNNM1         | -1.21 | 6.02 | ENSG00000119946 | cyclin and CBS domain divalent metal cation transport mediator 1 |
| ENDOG         | -1.21 | 3.16 | ENSG00000167136 | endonuclease G                                                   |
| WNT3          | -1.21 | 3.18 | ENSG00000277626 | Wnt family member 3                                              |
| RTN4R         | -1.21 | 4.33 | ENSG00000040608 | reticulon 4 receptor                                             |
| VWA5B2        | -1.21 | 3.16 | ENSG00000145198 | von Willebrand factor A domain containing 5B2                    |
| KLF15         | -1.21 | 3.55 | ENSG00000163884 | Kruppel like factor 15                                           |
| RBP4          | -1.21 | 8.12 | ENSG00000138207 | retinol binding protein 4                                        |
| MEIOB         | -1.21 | 4.06 | ENSG00000282650 | meiosis specific with OB domains                                 |
| UCA1          | -1.22 | 4.66 | ENSG00000273782 | Urothelial cancer associated 1 conserved region                  |
| TMEM52        | -1.22 | 1.37 | ENSG00000178821 | transmembrane protein 52                                         |
| SLC7A5        | -1.22 | 8.15 | ENSG00000103257 | solute carrier family 7 member 5                                 |
| SEMA5A        | -1.23 | 4.22 | ENSG00000112902 | semaphorin 5A                                                    |
| ADARB1        | -1.23 | 4.91 | ENSG00000197381 | adenosine deaminase, RNA specific B1                             |
| CHST9         | -1.24 | 3.81 | ENSG00000154080 | carbohydrate sulfotransferase 9                                  |
| HMGCS1        | -1.24 | 8.77 | ENSG00000112972 | 3-hydroxy-3-methylglutaryl-CoA synthase 1                        |
| TMEM238       | -1.25 | 2.20 | ENSG00000233493 | transmembrane protein 238                                        |
| GPT           | -1.25 | 1.34 | ENSG00000167701 | glutamic--pyruvic transaminase                                   |
| LFNG          | -1.25 | 2.01 | ENSG00000106003 | LFNG O-fucosylpeptide 3-beta-N-acetylglucosaminyltransferase     |
| RP11-259N19.1 | -1.26 | 2.05 | ENSG00000272711 | N/A                                                              |
| KANK4         | -1.26 | 2.92 | ENSG00000132854 | KN motif and ankyrin repeat domains 4                            |
| ARHGDIB       | -1.26 | 1.40 | ENSG00000111348 | Rho GDP dissociation inhibitor beta                              |

|          |       |       |                 |                                                             |
|----------|-------|-------|-----------------|-------------------------------------------------------------|
| HAL      | -1.27 | 3.97  | ENSG00000084110 | histidine ammonia-lyase                                     |
| TMC6     | -1.27 | 6.38  | ENSG00000141524 | transmembrane channel like 6                                |
| SLC19A3  | -1.28 | 5.02  | ENSG00000135917 | solute carrier family 19 member 3                           |
| TEAD4    | -1.29 | 5.37  | ENSG00000197905 | TEA domain transcription factor 4                           |
| MOGAT3   | -1.29 | 1.52  | ENSG00000106384 | monoacylglycerol O-acyltransferase 3                        |
| DDIT4    | -1.29 | 3.72  | ENSG00000168209 | DNA damage inducible transcript 4                           |
| ALB      | -1.29 | 13.58 | ENSG00000163631 | albumin                                                     |
| LONRF1   | -1.30 | 2.21  | ENSG00000154359 | LON peptidase N-terminal domain and ring finger 1           |
| KLF2     | -1.30 | 3.96  | ENSG00000127528 | Kruppel like factor 2                                       |
| KRT19    | -1.32 | 8.23  | ENSG00000171345 | keratin 19                                                  |
| CHAC1    | -1.32 | 4.35  | ENSG00000128965 | ChaC glutathione specific gamma-glutamylcyclotransferase 1  |
| ZBED6    | -1.32 | 3.70  | ENSG00000257315 | zinc finger BED-type containing 6                           |
| DUSP4    | -1.33 | 4.60  | ENSG00000120875 | dual specificity phosphatase 4                              |
| B3GALT2  | -1.33 | 1.14  | ENSG00000162630 | beta-1,3-galactosyltransferase 2                            |
| SYNE3    | -1.34 | 1.21  | ENSG00000176438 | spectrin repeat containing nuclear envelope family member 3 |
| MRM1     | -1.35 | 3.96  | ENSG00000274853 | mitochondrial rRNA methyltransferase 1                      |
| SYDE2    | -1.35 | 2.40  | ENSG00000097096 | synapse defective Rho GTPase homolog 2                      |
| INPP5F   | -1.35 | 4.30  | ENSG00000198825 | inositol polyphosphate-5-phosphatase F                      |
| SLC22A15 | -1.35 | 4.01  | ENSG00000163393 | solute carrier family 22 member 15                          |
| IGDCC3   | -1.36 | 6.28  | ENSG00000174498 | immunoglobulin superfamily DCC subclass member 3            |
| NBEAL1   | -1.37 | 4.56  | ENSG00000144426 | neurobeachin like 1                                         |
| SARDH    | -1.37 | 3.35  | ENSG00000123453 | sarcosine dehydrogenase                                     |
| PDP2     | -1.39 | 3.97  | ENSG00000172840 | pyruvate dehydrogenase phosphatase catalytic subunit 2      |
| LEAP2    | -1.39 | 1.25  | ENSG00000164406 | liver enriched antimicrobial peptide 2                      |
| ARHGAP23 | -1.39 | 5.93  | ENSG00000273780 | Rho GTPase activating protein 23                            |
| NAT8     | -1.40 | 4.20  | ENSG00000144035 | N-acetyltransferase 8 (putative)                            |
| TPPP     | -1.41 | 1.20  | ENSG00000171368 | tubulin polymerization promoting protein                    |
| TM4SF5   | -1.42 | 2.99  | ENSG00000142484 | transmembrane 4 L six family member 5                       |
| ANKRD1   | -1.42 | 7.10  | ENSG00000148677 | ankyrin repeat domain 1                                     |
| STC2     | -1.43 | 4.47  | ENSG00000113739 | stanniocalcin 2                                             |



|              |       |      |                 |                                                                      |
|--------------|-------|------|-----------------|----------------------------------------------------------------------|
| GOT1         | -1.43 | 7.15 | ENSG00000120053 | glutamic-oxaloacetic transaminase 1                                  |
| CHCHD2P2     | -1.43 | 1.46 | ENSG00000275346 | coiled-coil-helix-coiled-coil-helix domain containing 2 pseudogene 2 |
| HPD          | -1.43 | 3.57 | ENSG00000158104 | 4-hydroxyphenylpyruvate dioxygenase                                  |
| LCOR         | -1.44 | 3.73 | ENSG00000196233 | ligand dependent nuclear receptor corepressor                        |
| FLNC         | -1.44 | 5.55 | ENSG00000128591 | filamin C                                                            |
| VGLL3        | -1.44 | 4.95 | ENSG00000206538 | vestigial like family member 3                                       |
| TMEM200A     | -1.44 | 1.28 | ENSG00000164484 | transmembrane protein 200A                                           |
| OSGIN1       | -1.45 | 3.40 | ENSG00000140961 | oxidative stress induced growth inhibitor 1                          |
| FLI1         | -1.45 | 2.18 | ENSG00000151702 | Fli-1 proto-oncogene, ETS transcription factor                       |
| HES6         | -1.46 | 4.47 | ENSG00000144485 | hes family bHLH transcription factor 6                               |
| ATP2B2       | -1.46 | 5.11 | ENSG00000157087 | ATPase plasma membrane Ca <sup>2+</sup> transporting 2               |
| NR1H4        | -1.46 | 3.06 | ENSG0000012504  | nuclear receptor subfamily 1 group H member 4                        |
| MCTP1        | -1.47 | 3.16 | ENSG00000175471 | multiple C2 and transmembrane domain containing 1                    |
| RP11-103J8.1 | -1.48 | 1.84 | ENSG00000270792 | N/A                                                                  |
| CNN2         | -1.49 | 8.33 | ENSG00000064666 | calponin 2                                                           |
| DDN          | -1.50 | 1.45 | ENSG00000181418 | dendrin                                                              |
| ASNS         | -1.50 | 5.70 | ENSG00000070669 | asparagine synthetase (glutamine-hydrolyzing)                        |
| GLTPD2       | -1.50 | 4.80 | ENSG00000182327 | glycolipid transfer protein domain containing 2                      |
| FEM1A        | -1.51 | 1.12 | ENSG00000141965 | fem-1 homolog A                                                      |
| NPAS1        | -1.52 | 3.10 | ENSG00000130751 | neuronal PAS domain protein 1                                        |
| BHLHA15      | -1.52 | 2.94 | ENSG00000180535 | basic helix-loop-helix family member a15                             |
| IQCJ-SCHIP1  | -1.52 | 1.63 | ENSG00000283154 | IQCJ-SCHIP1 readthrough                                              |
| TRABD2A      | -1.53 | 5.35 | ENSG00000186854 | TraB domain containing 2A                                            |
| RP11-132A1.4 | -1.53 | 2.31 | ENSG00000232445 | N/A                                                                  |
| CNIH3        | -1.54 | 1.89 | ENSG00000143786 | cornichon family AMPA receptor auxiliary protein 3                   |
| PHGDH        | -1.54 | 5.41 | ENSG00000092621 | phosphoglycerate dehydrogenase                                       |

|               |       |      |                 |                                                                      |
|---------------|-------|------|-----------------|----------------------------------------------------------------------|
| DTX4          | -1.55 | 4.55 | ENSG00000110042 | deltex E3 ubiquitin ligase 4                                         |
| RP11-404G16.2 | -1.55 | 3.97 | ENSG00000244062 | N/A                                                                  |
| SH2D5         | -1.56 | 2.83 | ENSG00000189410 | SH2 domain containing 5                                              |
| MVB12B        | -1.56 | 5.52 | ENSG00000196814 | multivesicular body subunit 12B                                      |
| MATN3         | -1.56 | 3.88 | ENSG00000132031 | matrilin 3                                                           |
| KLHL11        | -1.59 | 1.10 | ENSG00000178502 | kelch like family member 11                                          |
| CYP1A1        | -1.60 | 5.24 | ENSG00000140465 | cytochrome P450 family 1 subfamily A member 1                        |
| PDF           | -1.62 | 2.93 | ENSG00000258429 | peptide deformylase (mitochondrial)                                  |
| MMP17         | -1.62 | 1.76 | ENSG00000198598 | matrix metalloproteinase 17                                          |
| SLC16A7       | -1.63 | 4.38 | ENSG00000118596 | solute carrier family 16 member 7                                    |
| COL5A2        | -1.64 | 7.44 | ENSG00000204262 | collagen type V alpha 2 chain                                        |
| C2orf16       | -1.64 | 2.36 | ENSG00000221843 | chromosome 2 open reading frame 16                                   |
| KAZALD1       | -1.65 | 1.72 | ENSG00000107821 | Kazal type serine peptidase inhibitor domain 1                       |
| F2            | -1.66 | 5.68 | ENSG00000180210 | coagulation factor II, thrombin                                      |
| CUX2          | -1.66 | 5.17 | ENSG00000111249 | cut like homeobox 2                                                  |
| FGA           | -1.67 | 5.90 | ENSG00000171560 | fibrinogen alpha chain                                               |
| TRIB3         | -1.67 | 5.96 | ENSG00000101255 | tribbles pseudokinase 3                                              |
| VSNL1         | -1.67 | 4.69 | ENSG00000163032 | visinin like 1                                                       |
| FGG           | -1.69 | 3.38 | ENSG00000171557 | fibrinogen gamma chain                                               |
| ELF5          | -1.71 | 2.66 | ENSG00000135374 | E74 like ETS transcription factor 5                                  |
| FGD3          | -1.72 | 1.41 | ENSG00000127084 | FYVE, RhoGEF and PH domain containing 3                              |
| PPM1K         | -1.79 | 3.95 | ENSG00000163644 | protein phosphatase, Mg <sup>2+</sup> /Mn <sup>2+</sup> dependent 1K |
| LONRF3        | -1.81 | 2.76 | ENSG00000175556 | LON peptidase N-terminal domain and ring finger 3                    |
| EDNRB         | -1.85 | 3.29 | ENSG00000136160 | endothelin receptor type B                                           |
| RTN4RL2       | -1.88 | 5.27 | ENSG00000186907 | reticulon 4 receptor-like 2                                          |
| SLC7A11       | -1.90 | 4.22 | ENSG00000151012 | solute carrier family 7 member 11                                    |
| PCSK9         | -1.91 | 5.94 | ENSG00000169174 | proprotein convertase subtilisin/kexin type 9                        |
| NTS           | -1.94 | 8.16 | ENSG00000133636 | neurotensin                                                          |
| CEBPA         | -1.96 | 7.42 | ENSG00000245848 | CCAAT/enhancer binding protein alpha                                 |
| SERBP1        | -1.96 | 7.71 | ENSG00000142864 | SERPINE1 mRNA binding protein 1                                      |
| BCAS1         | -1.98 | 1.98 | ENSG00000064787 | breast carcinoma amplified sequence 1                                |

|          |       |      |                 |                                                |
|----------|-------|------|-----------------|------------------------------------------------|
| CYP24A1  | -2.00 | 1.14 | ENSG00000019186 | cytochrome P450 family 24 subfamily A member 1 |
| PPARGC1B | -2.01 | 1.49 | ENSG00000155846 | PPARG coactivator 1 beta                       |
| SLC1A3   | -2.02 | 4.55 | ENSG00000079215 | solute carrier family 1 member 3               |
| CYP51A1  | -2.07 | 3.39 | ENSG00000001630 | cytochrome P450 family 51 subfamily A member 1 |
| SLC6A12  | -2.12 | 3.09 | ENSG00000111181 | solute carrier family 6 member 12              |
| TERT     | -2.13 | 1.80 | ENSG00000164362 | telomerase reverse transcriptase               |
| C10orf54 | -2.31 | 3.72 | ENSG00000107738 | chromosome 10 open reading frame 54            |
| AHSG     | -2.35 | 9.32 | ENSG00000145192 | alpha 2-HS glycoprotein                        |
| APOA1    | -2.39 | 7.02 | ENSG00000118137 | apolipoprotein A1                              |
| SYN3     | -2.41 | 3.64 | ENSG00000185666 | synapsin III                                   |
| HFE2     | -2.44 | 1.67 | ENSG00000168509 | hemochromatosis type 2 (juvenile)              |
| DUSP9    | -2.45 | 7.25 | ENSG00000130829 | dual specificity phosphatase 9                 |
| PDE4B    | -2.48 | 1.41 | ENSG00000184588 | phosphodiesterase 4B                           |
| CDH12    | -2.48 | 4.99 | ENSG00000154162 | cadherin 12                                    |
| TENM4    | -2.88 | 1.64 | ENSG00000149256 | teneurin transmembrane protein 4               |
| FGB      | -2.99 | 4.02 | ENSG00000171564 | fibrinogen beta chain                          |
| MYBPC3   | -3.24 | 1.69 | ENSG00000134571 | myosin binding protein C, cardiac              |
| ANGPTL3  | -3.89 | 4.78 | ENSG00000132855 | angiopoietin like 3                            |
| NPPB     | -4.29 | 3.22 | ENSG00000120937 | natriuretic peptide B                          |
| AFP      | -4.58 | 7.58 | ENSG00000081051 | alpha fetoprotein                              |

**Supplementary Table 4**

| Gene symbol   | log2 fold change<br>(shS6K1/shCtrl) | log2 counts<br>per million | Gene ID         | Gene description                                         |
|---------------|-------------------------------------|----------------------------|-----------------|----------------------------------------------------------|
| APOA4         | 4.36                                | 1.86                       | ENSG00000110244 | apolipoprotein A4                                        |
| CAPN8         | 4.20                                | 3.42                       | ENSG00000203697 | calpain 8                                                |
| SCGN          | 4.19                                | 3.72                       | ENSG00000079689 | secretagogin, EF-hand calcium<br>binding protein         |
| SERPINA4      | 4.00                                | 2.62                       | ENSG00000100665 | serpin family A member 4                                 |
| IFITM10       | 3.88                                | 3.28                       | ENSG00000281618 | interferon induced transmembrane<br>protein 10           |
| FOLR1         | 3.85                                | 2.35                       | ENSG00000110195 | folate receptor 1                                        |
| RP11-379K22.3 | 3.61                                | 2.13                       | ENSG00000270919 | N/A                                                      |
| TFF1          | 3.51                                | 2.94                       | ENSG00000160182 | trefoil factor 1                                         |
| IFI27         | 3.43                                | 1.27                       | ENSG00000275214 | interferon alpha inducible protein 27                    |
| HLA-DPB1      | 3.36                                | 2.37                       | ENSG00000229295 | major histocompatibility complex,<br>class II, DP beta 1 |
| GAL3ST1       | 3.32                                | 1.87                       | ENSG00000128242 | galactose-3-O-sulfotransferase 1                         |
| PHLDA3        | 3.31                                | 1.16                       | ENSG00000174307 | pleckstrin homology like domain<br>family A member 3     |
| FXYP3         | 3.26                                | 2.86                       | ENSG00000089356 | FXYP domain containing ion<br>transport regulator 3      |
| TSPO2         | 3.25                                | 1.50                       | ENSG00000112212 | translocator protein 2                                   |
| C1orf228      | 3.25                                | 2.17                       | ENSG00000198520 | chromosome 1 open reading frame<br>228                   |
| KRT81         | 3.22                                | 2.15                       | ENSG00000205426 | keratin 81                                               |
| IFI6          | 3.22                                | 6.37                       | ENSG00000126709 | interferon alpha inducible protein 6                     |
| QPCT          | 3.17                                | 1.04                       | ENSG00000115828 | glutamyl-peptide cyclotransferase                        |
| TMEM59L       | 3.04                                | 1.88                       | ENSG00000105696 | transmembrane protein 59 like                            |
| FABP6         | 2.97                                | 2.39                       | ENSG00000170231 | fatty acid binding protein 6                             |
| ARHGDI3       | 2.92                                | 2.34                       | ENSG00000111348 | Rho GDP dissociation inhibitor beta                      |
| OLFML2A       | 2.88                                | 2.66                       | ENSG00000185585 | olfactomedin like 2A                                     |
| S100A3        | 2.86                                | 1.84                       | ENSG00000188015 | S100 calcium binding protein A3                          |
| S100A4        | 2.85                                | 2.43                       | ENSG00000196154 | S100 calcium binding protein A4                          |
| RP11-10A14.5  | 2.83                                | 1.81                       | ENSG00000248538 | N/A                                                      |
| TTR           | 2.82                                | 3.49                       | ENSG00000118271 | transthyretin                                            |
| EMP3          | 2.81                                | 4.83                       | ENSG00000142227 | epithelial membrane protein 3                            |
| CLDN2         | 2.81                                | 2.17                       | ENSG00000165376 | claudin 2                                                |

|            |      |      |                 |                                                        |
|------------|------|------|-----------------|--------------------------------------------------------|
| GPR4       | 2.72 | 1.92 | ENSG00000177464 | G protein-coupled receptor 4                           |
| SLC22A17   | 2.72 | 3.37 | ENSG00000283151 | solute carrier family 22 member 17                     |
| EEF1A2     | 2.69 | 4.74 | ENSG00000101210 | eukaryotic translation elongation factor 1 alpha 2     |
| CA9        | 2.68 | 3.53 | ENSG00000107159 | carbonic anhydrase 9                                   |
| LINC00173  | 2.67 | 1.78 | ENSG00000196668 | long intergenic non-protein coding RNA 173             |
| HLA-DPA1   | 2.67 | 2.47 | ENSG00000231389 | major histocompatibility complex, class II, DP alpha 1 |
| THSD4      | 2.65 | 1.16 | ENSG00000187720 | thrombospondin type 1 domain containing 4              |
| CA12       | 2.64 | 1.65 | ENSG00000074410 | carbonic anhydrase 12                                  |
| LGI4       | 2.62 | 2.81 | ENSG00000153902 | leucine rich repeat LGI family member 4                |
| CD7        | 2.61 | 1.27 | ENSG00000173762 | CD7 molecule                                           |
| HTRA1      | 2.60 | 3.20 | ENSG00000166033 | HtrA serine peptidase 1                                |
| SERINC2    | 2.56 | 7.00 | ENSG00000168528 | serine incorporator 2                                  |
| TNFRSF1B   | 2.53 | 1.85 | ENSG00000028137 | TNF receptor superfamily member 1B                     |
| VSIG1      | 2.53 | 1.20 | ENSG00000101842 | V-set and immunoglobulin domain containing 1           |
| SPINT1     | 2.50 | 1.53 | ENSG00000166145 | serine peptidase inhibitor, Kunitz type 1              |
| GPSM3      | 2.49 | 2.33 | ENSG00000234243 | G-protein signaling modulator 3                        |
| C15orf48   | 2.48 | 3.03 | ENSG00000166920 | chromosome 15 open reading frame 48                    |
| UGT2B11    | 2.48 | 1.71 | ENSG00000213759 | UDP glucuronosyltransferase family 2 member B11        |
| SEPT4      | 2.47 | 2.18 | ENSG00000108387 | septin 4                                               |
| TIMP1      | 2.46 | 5.58 | ENSG00000102265 | TIMP metallopeptidase inhibitor 1                      |
| SLC22A9    | 2.45 | 1.39 | ENSG00000149742 | solute carrier family 22 member 9                      |
| MOXD1      | 2.43 | 4.44 | ENSG00000079931 | monooxygenase DBH like 1                               |
| AP001626.2 | 2.41 | 1.11 | ENSG00000235023 | N/A                                                    |
| IL2RG      | 2.41 | 3.21 | ENSG00000147168 | interleukin 2 receptor subunit gamma                   |
| CD74       | 2.40 | 1.74 | ENSG00000019582 | CD74 molecule                                          |
| SNCG       | 2.40 | 2.76 | ENSG00000173267 | synuclein gamma                                        |
| DPP4       | 2.40 | 2.36 | ENSG00000197635 | dipeptidyl peptidase 4                                 |

|               |      |      |                 |                                                         |
|---------------|------|------|-----------------|---------------------------------------------------------|
| RP11-130L8.2  | 2.39 | 1.82 | ENSG00000269976 | N/A                                                     |
| RP11-16E12.2  | 2.39 | 2.04 | ENSG00000259772 | N/A                                                     |
| CRIP2         | 2.37 | 2.16 | ENSG00000182809 | cysteine rich protein 2                                 |
| SPTSSB        | 2.37 | 4.62 | ENSG00000196542 | serine palmitoyltransferase small subunit B             |
| LDHD          | 2.37 | 2.64 | ENSG00000166816 | lactate dehydrogenase D                                 |
| SYCE1L        | 2.36 | 1.20 | ENSG00000205078 | synaptonemal complex central element protein 1 like     |
| EBF4          | 2.35 | 1.70 | ENSG00000088881 | early B-cell factor 4                                   |
| CFB           | 2.34 | 4.51 | ENSG00000243649 | complement factor B                                     |
| HPGD          | 2.34 | 2.37 | ENSG00000164120 | hydroxyprostaglandin dehydrogenase 15-(NAD)             |
| SULT1C2       | 2.34 | 1.18 | ENSG00000198203 | sulfotransferase family 1C member 2                     |
| CCDC153       | 2.33 | 3.01 | ENSG00000248712 | coiled-coil domain containing 153                       |
| CIDEC         | 2.33 | 4.24 | ENSG00000187288 | cell death inducing DFFA like effector c                |
| FAM131C       | 2.32 | 2.18 | ENSG00000185519 | family with sequence similarity 131 member C            |
| PIGZ          | 2.32 | 3.88 | ENSG00000119227 | phosphatidylinositol glycan anchor biosynthesis class Z |
| COL6A2        | 2.31 | 5.49 | ENSG00000142173 | collagen type VI alpha 2 chain                          |
| DKKL1         | 2.30 | 1.90 | ENSG00000104901 | dickkopf like acrosomal protein 1                       |
| NPY6R         | 2.30 | 1.74 | ENSG00000226306 | neuropeptide Y receptor Y6 (pseudogene)                 |
| CYP4F22       | 2.29 | 1.82 | ENSG00000171954 | cytochrome P450 family 4 subfamily F member 22          |
| PDZD3         | 2.29 | 1.01 | ENSG00000172367 | PDZ domain containing 3                                 |
| CDH17         | 2.28 | 2.43 | ENSG00000079112 | cadherin 17                                             |
| ACVRL1        | 2.28 | 1.13 | ENSG00000139567 | activin A receptor like type 1                          |
| IFI27L2       | 2.27 | 3.93 | ENSG00000276879 | interferon alpha inducible protein 27 like 2            |
| RP11-206M11.7 | 2.26 | 1.63 | ENSG00000244468 | N/A                                                     |
| FXYD5         | 2.26 | 5.47 | ENSG00000089327 | FXYD domain containing ion transport regulator 5        |
| NRAP          | 2.22 | 2.48 | ENSG00000197893 | nebulin related anchoring protein                       |
| CDK18         | 2.19 | 6.04 | ENSG00000117266 | cyclin dependent kinase 18                              |
| OVGP1         | 2.19 | 2.02 | ENSG00000085465 | oviductal glycoprotein 1                                |

|               |      |      |                 |                                                             |
|---------------|------|------|-----------------|-------------------------------------------------------------|
| AC079466.1    | 2.18 | 1.17 | ENSG00000266976 | N/A                                                         |
| LINC00511     | 2.18 | 2.70 | ENSG00000227036 | long intergenic non-protein coding RNA 511                  |
| CEACAM1       | 2.16 | 3.70 | ENSG00000079385 | carcinoembryonic antigen related cell adhesion molecule 1   |
| NFATC4        | 2.16 | 1.86 | ENSG00000100968 | nuclear factor of activated T-cells 4                       |
| KRT7          | 2.16 | 1.79 | ENSG00000135480 | keratin 7                                                   |
| IFIT1         | 2.15 | 1.36 | ENSG00000185745 | interferon induced protein with tetratricopeptide repeats 1 |
| SLC5A12       | 2.15 | 1.26 | ENSG00000148942 | solute carrier family 5 member 12                           |
| TMEM92        | 2.14 | 3.25 | ENSG00000167105 | transmembrane protein 92                                    |
| ENO2          | 2.14 | 1.98 | ENSG00000111674 | enolase 2                                                   |
| TMEM229B      | 2.13 | 1.53 | ENSG00000198133 | transmembrane protein 229B                                  |
| SLC5A11       | 2.13 | 2.09 | ENSG00000158865 | solute carrier family 5 member 11                           |
| RP11-441O15.3 | 2.12 | 1.01 | ENSG00000224934 | N/A                                                         |
| CORO6         | 2.11 | 2.86 | ENSG00000167549 | coronin 6                                                   |
| PRTN3         | 2.11 | 1.95 | ENSG00000196415 | proteinase 3                                                |
| OASL          | 2.11 | 1.89 | ENSG00000135114 | 2'-5'-oligoadenylate synthetase like                        |
| PAQR8         | 2.10 | 6.00 | ENSG00000170915 | progesterin and adipoQ receptor family member 8             |
| CLDN4         | 2.10 | 1.22 | ENSG00000189143 | claudin 4                                                   |
| SOCS2-AS1     | 2.09 | 2.17 | ENSG00000246985 | SOCS2 antisense RNA 1                                       |
| NDRG1         | 2.08 | 6.89 | ENSG00000104419 | N-myc downstream regulated 1                                |
| GALNT6        | 2.07 | 1.30 | ENSG00000139629 | polypeptide N-acetylgalactosaminyltransferase 6             |
| LINC00694     | 2.07 | 3.11 | ENSG00000225873 | long intergenic non-protein coding RNA 694                  |
| ISG15         | 2.07 | 6.47 | ENSG00000187608 | ISG15 ubiquitin-like modifier                               |
| PRAP1         | 2.06 | 1.79 | ENSG00000165828 | proline rich acidic protein 1                               |
| RAB3B         | 2.06 | 5.31 | ENSG00000169213 | RAB3B, member RAS oncogene family                           |
| LMF1          | 2.06 | 1.08 | ENSG00000103227 | lipase maturation factor 1                                  |
| MYEOV         | 2.06 | 3.57 | ENSG00000172927 | myeloma overexpressed                                       |
| BTN1A1        | 2.06 | 1.91 | ENSG00000124557 | butyrophilin subfamily 1 member A1                          |
| TM4SF1-AS1    | 2.06 | 1.91 | ENSG00000240541 | TM4SF1 antisense RNA 1                                      |
| GLIPR2        | 2.04 | 1.96 | ENSG00000122694 | GLI pathogenesis related 2                                  |

|               |      |      |                 |                                                          |
|---------------|------|------|-----------------|----------------------------------------------------------|
| HES7          | 2.04 | 3.31 | ENSG00000179111 | hes family bHLH transcription factor 7                   |
| NOVA2         | 2.03 | 1.83 | ENSG00000104967 | NOVA alternative splicing regulator 2                    |
| TMEM91        | 2.03 | 1.83 | ENSG00000142046 | transmembrane protein 91                                 |
| RUNDC3A       | 2.03 | 1.36 | ENSG00000108309 | RUN domain containing 3A                                 |
| ECM1          | 2.03 | 2.12 | ENSG00000143369 | extracellular matrix protein 1                           |
| RP11-798K3.2  | 2.03 | 3.05 | ENSG00000259347 | N/A                                                      |
| CDKN1A        | 2.02 | 4.51 | ENSG00000124762 | cyclin dependent kinase inhibitor 1A                     |
| HRCT1         | 2.02 | 1.26 | ENSG00000196196 | histidine rich carboxyl terminus 1                       |
| DUSP13        | 2.01 | 2.88 | ENSG00000079393 | dual specificity phosphatase 13                          |
| F2RL1         | 2.01 | 2.78 | ENSG00000164251 | F2R like trypsin receptor 1                              |
| AXL           | 2.01 | 4.59 | ENSG00000167601 | AXL receptor tyrosine kinase                             |
| CD44          | 1.99 | 1.80 | ENSG00000026508 | CD44 molecule (Indian blood group)                       |
| GLIPR1        | 1.99 | 1.03 | ENSG00000139278 | GLI pathogenesis related 1                               |
| PAGE1         | 1.99 | 1.92 | ENSG00000068985 | PAGE family member 1                                     |
| NPC1L1        | 1.99 | 1.24 | ENSG00000015520 | NPC1 like intracellular cholesterol transporter 1        |
| ACSL5         | 1.99 | 5.16 | ENSG00000197142 | acyl-CoA synthetase long-chain family member 5           |
| KCNN1         | 1.99 | 4.45 | ENSG00000105642 | potassium calcium-activated channel subfamily N member 1 |
| AP001626.1    | 1.97 | 2.42 | ENSG00000225431 | N/A                                                      |
| RP4-758J18.10 | 1.97 | 1.71 | ENSG00000225285 | N/A                                                      |
| GNG12         | 1.96 | 2.72 | ENSG00000172380 | G protein subunit gamma 12                               |
| C10orf10      | 1.96 | 1.22 | ENSG00000165507 | chromosome 10 open reading frame 10                      |
| ZNF208        | 1.96 | 1.01 | ENSG00000160321 | zinc finger protein 208                                  |
| SERPINE1      | 1.96 | 2.96 | ENSG00000106366 | serpin family E member 1                                 |
| CSTA          | 1.95 | 1.63 | ENSG00000121552 | cystatin A                                               |
| ARSD          | 1.95 | 1.83 | ENSG00000006756 | arylsulfatase D                                          |
| RP11-44N11.3  | 1.93 | 1.46 | ENSG00000272043 | N/A                                                      |
| SERPINE2      | 1.93 | 3.30 | ENSG00000135919 | serpin family E member 2                                 |
| TMEM86A       | 1.93 | 2.24 | ENSG00000151117 | transmembrane protein 86A                                |
| CACNG6        | 1.92 | 3.50 | ENSG00000130433 | calcium voltage-gated channel auxiliary subunit gamma 6  |
| TMEM74B       | 1.92 | 2.71 | ENSG00000125895 | transmembrane protein 74B                                |



|               |      |       |                 |                                                                    |
|---------------|------|-------|-----------------|--------------------------------------------------------------------|
| BEST3         | 1.90 | 1.17  | ENSG00000127325 | bestrophin 3                                                       |
| VWCE          | 1.90 | 1.44  | ENSG00000167992 | von Willebrand factor C and EGF domains                            |
| SERPINA5      | 1.90 | 4.30  | ENSG00000188488 | serpin family A member 5                                           |
| VNN2          | 1.89 | 2.59  | ENSG00000112303 | vanin 2                                                            |
| LINC00886     | 1.88 | 1.05  | ENSG00000240875 | long intergenic non-protein coding RNA 886                         |
| SLC4A3        | 1.87 | 1.49  | ENSG00000114923 | solute carrier family 4 member 3                                   |
| LAMB3         | 1.87 | 3.97  | ENSG00000196878 | laminin subunit beta 3                                             |
| BMF           | 1.87 | 4.10  | ENSG00000104081 | Bcl2 modifying factor                                              |
| RAB27B        | 1.85 | 2.37  | ENSG00000041353 | RAB27B, member RAS oncogene family                                 |
| LHPP          | 1.85 | 5.66  | ENSG00000107902 | phospholysine phosphohistidine inorganic pyrophosphate phosphatase |
| SLC2A9        | 1.85 | 4.13  | ENSG00000109667 | solute carrier family 2 member 9                                   |
| P2RY6         | 1.84 | 1.54  | ENSG00000171631 | pyrimidinergic receptor P2Y6                                       |
| IFITM2        | 1.83 | 4.00  | ENSG00000185201 | interferon induced transmembrane protein 2                         |
| CAMKV         | 1.83 | 1.21  | ENSG00000164076 | CaM kinase like vesicle associated                                 |
| CCNG2         | 1.83 | 1.68  | ENSG00000138764 | cyclin G2                                                          |
| NOTCH2NL      | 1.83 | 1.30  | ENSG00000264343 | notch 2 N-terminal like                                            |
| RP11-356M20.1 | 1.83 | 1.30  | ENSG00000259674 | N/A                                                                |
| TIMP2         | 1.82 | 4.44  | ENSG00000035862 | TIMP metalloproteinase inhibitor 2                                 |
| ABCG4         | 1.82 | 2.80  | ENSG00000172350 | ATP binding cassette subfamily G member 4                          |
| ATOH8         | 1.82 | 1.96  | ENSG00000168874 | atonal bHLH transcription factor 8                                 |
| VWA5B2        | 1.82 | 3.93  | ENSG00000145198 | von Willebrand factor A domain containing 5B2                      |
| RAB17         | 1.82 | 4.05  | ENSG00000124839 | RAB17, member RAS oncogene family                                  |
| SEMA4A        | 1.80 | 2.24  | ENSG00000196189 | semaphorin 4A                                                      |
| RP11-54O7.3   | 1.79 | 2.36  | ENSG00000223764 | N/A                                                                |
| CLU           | 1.78 | 11.65 | ENSG00000120885 | clusterin                                                          |
| PLEKHH2       | 1.78 | 2.82  | ENSG00000152527 | pleckstrin homology, MyTH4 and FERM domain containing H2           |
| DUSP15        | 1.77 | 2.35  | ENSG00000149599 | dual specificity phosphatase 15                                    |
| JAK3          | 1.77 | 3.15  | ENSG00000105639 | Janus kinase 3                                                     |

|               |      |      |                 |                                                              |
|---------------|------|------|-----------------|--------------------------------------------------------------|
| SCN1B         | 1.77 | 4.78 | ENSG00000105711 | sodium voltage-gated channel beta subunit 1                  |
| CDH23         | 1.77 | 3.28 | ENSG00000107736 | cadherin related 23                                          |
| KPNA7         | 1.76 | 3.05 | ENSG00000185467 | karyopherin subunit alpha 7                                  |
| PCDH1         | 1.76 | 2.72 | ENSG00000156453 | protocadherin 1                                              |
| SLC12A5       | 1.76 | 2.92 | ENSG00000124140 | solute carrier family 12 member 5                            |
| GSN           | 1.75 | 5.73 | ENSG00000148180 | gelsolin                                                     |
| RP11-617F23.1 | 1.75 | 2.62 | ENSG00000259291 | N/A                                                          |
| TMEM159       | 1.74 | 2.01 | ENSG00000011638 | transmembrane protein 159                                    |
| LDLRAD4       | 1.74 | 1.96 | ENSG00000168675 | low density lipoprotein receptor class A domain containing 4 |
| TCN2          | 1.74 | 1.91 | ENSG00000185339 | transcobalamin 2                                             |
| CACNG7        | 1.74 | 1.15 | ENSG00000105605 | calcium voltage-gated channel auxiliary subunit gamma 7      |
| APOC1P1       | 1.74 | 1.05 | ENSG00000214855 | apolipoprotein C1 pseudogene 1                               |
| RP11-44N11.2  | 1.74 | 3.40 | ENSG00000272384 | N/A                                                          |
| CRLF2         | 1.74 | 2.57 | ENSG00000205755 | cytokine receptor-like factor 2                              |
| TP53INP1      | 1.73 | 3.78 | ENSG00000164938 | tumor protein p53 inducible nuclear protein 1                |
| SPEG          | 1.73 | 1.84 | ENSG00000072195 | SPEG complex locus                                           |
| AGAP2         | 1.72 | 1.66 | ENSG00000135439 | ArfGAP with GTPase domain, ankyrin repeat and PH domain 2    |
| DSC2          | 1.71 | 2.62 | ENSG00000134755 | desmocollin 2                                                |
| RP11-466H18.1 | 1.71 | 1.21 | ENSG00000244398 | N/A                                                          |
| TUBA4B        | 1.71 | 2.45 | ENSG00000243910 | tubulin alpha 4b                                             |
| EVA1C         | 1.71 | 1.03 | ENSG00000166979 | eva-1 homolog C                                              |
| ADAMTS7       | 1.70 | 1.64 | ENSG00000136378 | ADAM metalloproteinase with thrombospondin type 1 motif 7    |
| ANXA3         | 1.70 | 3.91 | ENSG00000138772 | annexin A3                                                   |
| HPSE          | 1.69 | 2.32 | ENSG00000173083 | heparanase                                                   |
| MFGE8         | 1.69 | 6.47 | ENSG00000140545 | milk fat globule-EGF factor 8 protein                        |
| RP11-480I12.5 | 1.69 | 1.81 | ENSG00000214796 | N/A                                                          |
| PAGE2B        | 1.68 | 1.28 | ENSG00000238269 | PAGE family member 2B                                        |
| VGF           | 1.68 | 3.87 | ENSG00000128564 | VGF nerve growth factor inducible                            |
| LGALS1        | 1.68 | 7.74 | ENSG00000100097 | galectin 1                                                   |
| DAPK2         | 1.68 | 3.50 | ENSG00000035664 | death associated protein kinase 2                            |
| RP11-284F21.9 | 1.68 | 3.89 | ENSG00000272068 | N/A                                                          |

|               |      |      |                 |                                                                    |
|---------------|------|------|-----------------|--------------------------------------------------------------------|
| CRYBB2        | 1.67 | 1.00 | ENSG00000244752 | crystallin beta B2                                                 |
| CRYAB         | 1.67 | 3.37 | ENSG00000109846 | crystallin alpha B                                                 |
| ADSSL1        | 1.67 | 2.14 | ENSG00000185100 | adenylosuccinate synthase like 1                                   |
| GLT8D2        | 1.67 | 2.14 | ENSG00000120820 | glycosyltransferase 8 domain<br>containing 2                       |
| MBNL2         | 1.66 | 5.10 | ENSG00000139793 | muscleblind like splicing regulator 2                              |
| PPP1R3C       | 1.66 | 3.00 | ENSG00000119938 | protein phosphatase 1 regulatory<br>subunit 3C                     |
| EMB           | 1.64 | 1.66 | ENSG00000170571 | embigin                                                            |
| F2R           | 1.64 | 1.66 | ENSG00000181104 | coagulation factor II thrombin<br>receptor                         |
| RASSF2        | 1.63 | 2.07 | ENSG00000101265 | Ras association domain family<br>member 2                          |
| DAO           | 1.63 | 2.90 | ENSG00000110887 | D-amino acid oxidase                                               |
| FER1L4        | 1.63 | 5.76 | ENSG00000088340 | fer-1 like family member 4,<br>pseudogene                          |
| TRAF3IP2      | 1.62 | 1.23 | ENSG00000056972 | TRAF3 interacting protein 2                                        |
| DOC2GP        | 1.62 | 2.31 | ENSG00000231793 | double C2 domain gamma<br>pseudogene                               |
| RP4-710M16.2  | 1.62 | 3.02 | ENSG00000223956 | N/A                                                                |
| HMGCS2        | 1.62 | 2.87 | ENSG00000134240 | 3-hydroxy-3-methylglutaryl-CoA<br>synthase 2                       |
| TTLL6         | 1.61 | 1.81 | ENSG00000170703 | tubulin tyrosine ligase like 6                                     |
| POU2AF1       | 1.60 | 1.30 | ENSG00000110777 | POU class 2 associating factor 1                                   |
| RP11-6B4.1    | 1.60 | 1.91 | ENSG00000243694 | N/A                                                                |
| FKBP1B        | 1.60 | 3.41 | ENSG00000119782 | FK506 binding protein 1B                                           |
| GPRC5A        | 1.60 | 2.54 | ENSG00000135888 | G protein-coupled receptor class C<br>group 5 member A             |
| RPL10L        | 1.59 | 1.43 | ENSG00000165496 | ribosomal protein L10 like                                         |
| GNG7          | 1.59 | 3.04 | ENSG00000176533 | G protein subunit gamma 7                                          |
| ZDHHC19       | 1.58 | 1.12 | ENSG00000163958 | zinc finger DHHC-type containing<br>19                             |
| AGR2          | 1.58 | 7.93 | ENSG00000106541 | anterior gradient 2, protein<br>disulphide isomerase family member |
| SOX9          | 1.58 | 2.65 | ENSG00000125398 | SRY-box 9                                                          |
| RP11-495P10.6 | 1.58 | 2.24 | ENSG00000234283 | N/A                                                                |
| TMEM37        | 1.57 | 6.57 | ENSG00000171227 | transmembrane protein 37                                           |

|            |      |      |                 |                                                              |
|------------|------|------|-----------------|--------------------------------------------------------------|
| SMIM6      | 1.56 | 1.41 | ENSG00000259120 | small integral membrane protein 6                            |
| USH1C      | 1.56 | 4.72 | ENSG00000006611 | USH1 protein network component<br>harmonin                   |
| APOBEC3B   | 1.56 | 2.34 | ENSG00000179750 | apolipoprotein B mRNA editing<br>enzyme catalytic subunit 3B |
| NRG2       | 1.56 | 1.19 | ENSG00000158458 | neuregulin 2                                                 |
| C11orf70   | 1.56 | 1.72 | ENSG00000137691 | chromosome 11 open reading frame<br>70                       |
| TMEM54     | 1.56 | 5.47 | ENSG00000121900 | transmembrane protein 54                                     |
| COL1A1     | 1.56 | 2.57 | ENSG00000108821 | collagen type I alpha 1 chain                                |
| EHD2       | 1.56 | 4.40 | ENSG0000024422  | EH domain containing 2                                       |
| TNNT1      | 1.55 | 6.63 | ENSG00000105048 | troponin T1, slow skeletal type                              |
| MSRB2      | 1.55 | 6.07 | ENSG00000148450 | methionine sulfoxide reductase B2                            |
| SEL1L3     | 1.55 | 5.64 | ENSG00000091490 | SEL1L family member 3                                        |
| TTC9       | 1.55 | 2.14 | ENSG00000133985 | tetratricopeptide repeat domain 9                            |
| AF127936.7 | 1.55 | 1.10 | ENSG00000281903 | N/A                                                          |
| PRKCG      | 1.54 | 4.99 | ENSG00000126583 | protein kinase C gamma                                       |
| GREM2      | 1.54 | 1.86 | ENSG00000180875 | gremlin 2, DAN family BMP<br>antagonist                      |
| TP53I11    | 1.54 | 5.75 | ENSG00000175274 | tumor protein p53 inducible protein<br>11                    |
| PROCR      | 1.54 | 2.86 | ENSG00000101000 | protein C receptor                                           |
| SSUH2      | 1.54 | 5.42 | ENSG00000125046 | ssu-2 homolog ( <i>C. elegans</i> )                          |
| DUSP5      | 1.54 | 5.17 | ENSG00000138166 | dual specificity phosphatase 5                               |
| VIM        | 1.54 | 7.07 | ENSG0000026025  | vimentin                                                     |
| CAV1       | 1.54 | 2.96 | ENSG00000105974 | caveolin 1                                                   |
| HPN        | 1.53 | 7.24 | ENSG00000105707 | hepsin                                                       |
| MEIS3      | 1.53 | 4.66 | ENSG00000105419 | Meis homeobox 3                                              |
| C2CD4B     | 1.53 | 1.52 | ENSG00000205502 | C2 calcium dependent domain<br>containing 4B                 |
| NRGN       | 1.53 | 3.73 | ENSG00000154146 | neurogranin                                                  |
| CYP3A5     | 1.53 | 1.90 | ENSG00000106258 | cytochrome P450 family 3 subfamily<br>A member 5             |
| TCF7L1     | 1.53 | 3.13 | ENSG00000152284 | transcription factor 7 like 1                                |
| CCDC159    | 1.53 | 4.80 | ENSG00000183401 | coiled-coil domain containing 159                            |
| DNAH5      | 1.53 | 1.17 | ENSG00000039139 | dynein axonemal heavy chain 5                                |
| IQSEC2     | 1.53 | 3.20 | ENSG00000124313 | IQ motif and Sec7 domain 2                                   |

|              |      |      |                 |                                                                           |
|--------------|------|------|-----------------|---------------------------------------------------------------------------|
| SLC17A7      | 1.53 | 3.10 | ENSG00000104888 | solute carrier family 17 member 7                                         |
| ATP2A3       | 1.52 | 3.86 | ENSG00000074370 | ATPase sarcoplasmic/endoplasmic reticulum Ca <sup>2+</sup> transporting 3 |
| IQCD         | 1.52 | 3.18 | ENSG00000166578 | IQ motif containing D                                                     |
| VNN3         | 1.52 | 1.45 | ENSG00000093134 | vanin 3                                                                   |
| CTD-2545H1.2 | 1.51 | 1.23 | ENSG00000262445 | N/A                                                                       |
| KLHL7-AS1    | 1.51 | 1.23 | ENSG00000230658 | KLHL7 antisense RNA 1 (head to head)                                      |
| BTBD16       | 1.51 | 1.98 | ENSG00000138152 | BTB domain containing 16                                                  |
| PLEKHA2      | 1.51 | 2.23 | ENSG00000169499 | pleckstrin homology domain containing A2                                  |
| RAB26        | 1.51 | 5.79 | ENSG00000167964 | RAB26, member RAS oncogene family                                         |
| PPP1R3F      | 1.50 | 1.73 | ENSG00000049769 | protein phosphatase 1 regulatory subunit 3F                               |
| SRRM3        | 1.50 | 4.03 | ENSG00000177679 | serine/arginine repetitive matrix 3                                       |
| MMP11        | 1.50 | 2.56 | ENSG00000099953 | matrix metalloproteinase 11                                               |
| MACROD1      | 1.50 | 4.72 | ENSG00000133315 | MACRO domain containing 1                                                 |
| TEPP         | 1.49 | 1.56 | ENSG00000159648 | testis, prostate and placenta expressed                                   |
| TBX19        | 1.48 | 2.69 | ENSG00000143178 | T-box 19                                                                  |
| HLA-B        | 1.48 | 6.30 | ENSG00000206450 | major histocompatibility complex, class I, B                              |
| PCAT6        | 1.48 | 4.72 | ENSG00000228288 | prostate cancer associated transcript 6 (non-protein coding)              |
| B3GNT5       | 1.48 | 1.35 | ENSG00000176597 | UDP-GlcNAc:betaGal beta-1,3-N-acetylglucosaminyltransferase 5             |
| PCED1B       | 1.48 | 4.43 | ENSG00000179715 | PC-esterase domain containing 1B                                          |
| GSDMB        | 1.47 | 6.05 | ENSG00000073605 | gasdermin B                                                               |
| CCDC88B      | 1.47 | 4.54 | ENSG00000168071 | coiled-coil domain containing 88B                                         |
| C2orf81      | 1.47 | 3.22 | ENSG00000159239 | chromosome 2 open reading frame 81                                        |
| DENND6B      | 1.47 | 2.08 | ENSG00000205593 | DENN domain containing 6B                                                 |
| UCP2         | 1.46 | 7.04 | ENSG00000175567 | uncoupling protein 2                                                      |
| DOCK11       | 1.46 | 1.70 | ENSG00000147251 | dedicator of cytokinesis 11                                               |
| XPNPEP2      | 1.46 | 2.64 | ENSG00000122121 | X-prolyl aminopeptidase 2                                                 |
| SP100        | 1.46 | 2.87 | ENSG00000067066 | SP100 nuclear antigen                                                     |

|               |      |      |                 |                                                                                 |
|---------------|------|------|-----------------|---------------------------------------------------------------------------------|
| HIST1H2BD     | 1.45 | 2.59 | ENSG00000158373 | histone cluster 1 H2B family member d                                           |
| AC004012.1    | 1.45 | 2.07 | ENSG00000233942 | N/A                                                                             |
| PBXIP1        | 1.45 | 6.70 | ENSG00000163346 | PBX homeobox interacting protein 1                                              |
| GBP2          | 1.45 | 5.53 | ENSG00000162645 | guanylate binding protein 2                                                     |
| KIAA1107      | 1.45 | 1.19 | ENSG00000069712 | KIAA1107                                                                        |
| TPD52L1       | 1.45 | 2.74 | ENSG00000111907 | tumor protein D52-like 1                                                        |
| ANGPTL4       | 1.44 | 5.94 | ENSG00000167772 | angiopoietin like 4                                                             |
| RP11-1398P2.1 | 1.44 | 1.52 | ENSG00000244459 | N/A                                                                             |
| SPATA6L       | 1.44 | 1.52 | ENSG00000106686 | spermatogenesis associated 6 like                                               |
| PDCD4         | 1.44 | 4.68 | ENSG00000150593 | programmed cell death 4 (neoplastic transformation inhibitor)                   |
| HLA-DMA       | 1.44 | 5.06 | ENSG00000243215 | major histocompatibility complex, class II, DM alpha                            |
| LRRRC8C       | 1.44 | 1.39 | ENSG00000171488 | leucine rich repeat containing 8 family member C                                |
| AZU1          | 1.43 | 1.25 | ENSG00000172232 | azurocidin 1                                                                    |
| RP11-848P1.7  | 1.43 | 1.25 | ENSG00000264148 | N/A                                                                             |
| COL6A1        | 1.43 | 5.72 | ENSG00000142156 | collagen type VI alpha 1 chain                                                  |
| UGT1A10       | 1.43 | 3.32 | ENSG00000242515 | UDP glucuronosyltransferase family 1 member A10                                 |
| LY6E          | 1.43 | 7.22 | ENSG00000160932 | lymphocyte antigen 6 complex, locus E                                           |
| TXNIP         | 1.43 | 1.73 | ENSG00000265972 | thioredoxin interacting protein                                                 |
| CITED4        | 1.43 | 3.38 | ENSG00000179862 | Cbp/p300 interacting transactivator with Glu/Asp rich carboxy-terminal domain 4 |
| GFPT2         | 1.43 | 2.85 | ENSG00000131459 | glutamine-fructose-6-phosphate transaminase 2                                   |
| TSPAN10       | 1.42 | 1.31 | ENSG00000182612 | tetraspanin 10                                                                  |
| MAMSTR        | 1.42 | 3.53 | ENSG00000176909 | MEF2 activating motif and SAP domain containing transcriptional regulator       |
| RP11-467L13.5 | 1.42 | 5.41 | ENSG00000223722 | N/A                                                                             |
| S100A14       | 1.42 | 4.93 | ENSG00000189334 | S100 calcium binding protein A14                                                |
| NEURL3        | 1.42 | 2.13 | ENSG00000163121 | neuralized E3 ubiquitin protein ligase 3                                        |
| CRYM          | 1.42 | 3.22 | ENSG00000103316 | crystallin mu                                                                   |

|              |      |      |                 |                                                                  |
|--------------|------|------|-----------------|------------------------------------------------------------------|
| RP11-390P2.4 | 1.42 | 3.48 | ENSG00000225177 | N/A                                                              |
| AC144652.1   | 1.41 | 1.17 | ENSG00000273117 | N/A                                                              |
| EDA          | 1.41 | 1.17 | ENSG00000158813 | ectodysplasin A                                                  |
| RAC1P2       | 1.41 | 1.17 | ENSG00000249936 | ras-related C3 botulinum toxin substrate 1 pseudogene 2          |
| SOCS2        | 1.41 | 3.37 | ENSG00000120833 | suppressor of cytokine signaling 2                               |
| SLC7A10      | 1.41 | 2.67 | ENSG00000130876 | solute carrier family 7 member 10                                |
| SPOCK2       | 1.41 | 2.53 | ENSG00000107742 | SPARC/osteonectin, cwcv and kazal like domains proteoglycan 2    |
| RP11-462G2.1 | 1.41 | 4.85 | ENSG00000237643 | N/A                                                              |
| AC005355.2   | 1.41 | 2.08 | ENSG00000251169 | N/A                                                              |
| TRPV2        | 1.41 | 1.72 | ENSG00000187688 | transient receptor potential cation channel subfamily V member 2 |
| LINC00634    | 1.40 | 1.23 | ENSG00000205704 | long intergenic non-protein coding RNA 634                       |
| SLC1A6       | 1.40 | 4.78 | ENSG00000105143 | solute carrier family 1 member 6                                 |
| CABP1        | 1.40 | 1.60 | ENSG00000157782 | calcium binding protein 1                                        |
| CGA          | 1.40 | 8.19 | ENSG00000135346 | glycoprotein hormones, alpha polypeptide                         |
| TMSB10P1     | 1.40 | 2.76 | ENSG00000228499 | thymosin beta 10 pseudogene 1                                    |
| SLC29A4      | 1.39 | 8.54 | ENSG00000164638 | solute carrier family 29 member 4                                |
| APLF         | 1.39 | 1.07 | ENSG00000169621 | aprataxin and PNKP like factor                                   |
| BSPRY        | 1.39 | 1.07 | ENSG00000119411 | B-box and SPRY domain containing                                 |
| SHBG         | 1.39 | 1.07 | ENSG00000129214 | sex hormone binding globulin                                     |
| RP6-65G23.3  | 1.39 | 2.94 | ENSG00000259153 | N/A                                                              |
| NINJ2        | 1.39 | 3.29 | ENSG00000171840 | ninjurin 2                                                       |
| HLA-F        | 1.39 | 3.76 | ENSG00000229698 | major histocompatibility complex, class I, F                     |
| APH1B        | 1.38 | 3.04 | ENSG00000138613 | aph-1 homolog B, gamma-secretase subunit                         |
| RHEBL1       | 1.38 | 1.14 | ENSG00000167550 | Ras homolog enriched in brain like 1                             |
| MCOLN2       | 1.38 | 1.75 | ENSG00000153898 | mucolipin 2                                                      |
| RBP5         | 1.38 | 1.75 | ENSG00000139194 | retinol binding protein 5                                        |
| WDR31        | 1.38 | 1.75 | ENSG00000148225 | WD repeat domain 31                                              |
| IL1R2        | 1.37 | 5.24 | ENSG00000115590 | interleukin 1 receptor type 2                                    |
| C1QTNF1      | 1.37 | 6.06 | ENSG00000173918 | C1q and tumor necrosis factor related protein 1                  |

|           |      |      |                 |                                                                    |
|-----------|------|------|-----------------|--------------------------------------------------------------------|
| CAV2      | 1.37 | 3.11 | ENSG00000105971 | caveolin 2                                                         |
| CREB3L1   | 1.37 | 3.99 | ENSG00000157613 | cAMP responsive element binding protein 3 like 1                   |
| USP2-AS1  | 1.37 | 2.31 | ENSG00000245248 | USP2 antisense RNA 1 (head to head)                                |
| AQP3      | 1.37 | 3.15 | ENSG00000165272 | aquaporin 3 (Gill blood group)                                     |
| C11orf86  | 1.36 | 1.47 | ENSG00000173237 | chromosome 11 open reading frame 86                                |
| RNASET2   | 1.36 | 6.58 | ENSG00000026297 | ribonuclease T2                                                    |
| CAPN5     | 1.36 | 5.57 | ENSG00000149260 | calpain 5                                                          |
| CDHR2     | 1.36 | 4.21 | ENSG00000074276 | cadherin related family member 2                                   |
| DKK3      | 1.36 | 5.79 | ENSG00000050165 | dickkopf WNT signaling pathway inhibitor 3                         |
| PKD1L2    | 1.36 | 2.00 | ENSG00000166473 | polycystin 1 like 2 (gene/pseudogene)                              |
| HSD17B7P2 | 1.36 | 1.52 | ENSG00000099251 | hydroxysteroid 17-beta dehydrogenase 7 pseudogene 2                |
| REEP2     | 1.35 | 2.63 | ENSG00000132563 | receptor accessory protein 2                                       |
| ATP1B2    | 1.35 | 1.33 | ENSG00000129244 | ATPase Na <sup>+</sup> /K <sup>+</sup> transporting subunit beta 2 |
| CACNB3    | 1.35 | 4.66 | ENSG00000167535 | calcium voltage-gated channel auxiliary subunit beta 3             |
| RWDD2B    | 1.35 | 4.57 | ENSG00000156253 | RWD domain containing 2B                                           |
| SRPX      | 1.35 | 2.67 | ENSG00000101955 | sushi repeat containing protein, X-linked                          |
| IFITM3    | 1.35 | 9.76 | ENSG00000142089 | interferon induced transmembrane protein 3                         |
| UGT2B7    | 1.35 | 1.12 | ENSG00000171234 | UDP glucuronosyltransferase family 2 member B7                     |
| ITGA3     | 1.34 | 4.82 | ENSG00000005884 | integrin subunit alpha 3                                           |
| WDR25     | 1.34 | 3.39 | ENSG00000176473 | WD repeat domain 25                                                |
| UBE2L6    | 1.34 | 4.87 | ENSG00000156587 | ubiquitin conjugating enzyme E2 L6                                 |
| KCNH3     | 1.34 | 1.82 | ENSG00000135519 | potassium voltage-gated channel subfamily H member 3               |
| HCP5      | 1.34 | 1.45 | ENSG00000237105 | HLA complex P5 (non-protein coding)                                |



|                |      |      |                 |                                                                       |
|----------------|------|------|-----------------|-----------------------------------------------------------------------|
| KCNAB2         | 1.34 | 1.67 | ENSG00000069424 | potassium voltage-gated channel subfamily A regulatory beta subunit 2 |
| F10            | 1.34 | 6.47 | ENSG00000126218 | coagulation factor X                                                  |
| TUBAL3         | 1.34 | 2.18 | ENSG00000178462 | tubulin alpha like 3                                                  |
| CFH            | 1.33 | 2.21 | ENSG00000000971 | complement factor H                                                   |
| RAD51-AS1      | 1.33 | 1.50 | ENSG00000245849 | RAD51 antisense RNA 1 (head to head)                                  |
| WBSCR27        | 1.33 | 1.50 | ENSG00000165171 | Williams Beuren syndrome chromosome region 27                         |
| RIN2           | 1.33 | 1.25 | ENSG00000132669 | Ras and Rab interactor 2                                              |
| NPAS1          | 1.33 | 4.30 | ENSG00000130751 | neuronal PAS domain protein 1                                         |
| MYO15B         | 1.32 | 4.10 | ENSG00000266714 | myosin XVB                                                            |
| FAM105A        | 1.32 | 1.31 | ENSG00000145569 | family with sequence similarity 105 member A                          |
| BST2           | 1.32 | 8.12 | ENSG00000130303 | bone marrow stromal cell antigen 2                                    |
| ITIH1          | 1.32 | 4.13 | ENSG00000055957 | inter-alpha-trypsin inhibitor heavy chain 1                           |
| DLG5-AS1       | 1.32 | 2.02 | ENSG00000233871 | DLG5 antisense RNA 1                                                  |
| LINC00467      | 1.32 | 2.34 | ENSG00000153363 | long intergenic non-protein coding RNA 467                            |
| EFHD1          | 1.32 | 2.20 | ENSG00000115468 | EF-hand domain family member D1                                       |
| ALDH3B1        | 1.32 | 3.20 | ENSG00000006534 | aldehyde dehydrogenase 3 family member B1                             |
| LGALS3BP       | 1.32 | 9.23 | ENSG00000108679 | galectin 3 binding protein                                            |
| PCDH17         | 1.31 | 1.37 | ENSG00000118946 | protocadherin 17                                                      |
| TTC39B         | 1.31 | 1.37 | ENSG00000155158 | tetratricopeptide repeat domain 39B                                   |
| SLC27A1        | 1.31 | 4.71 | ENSG00000130304 | solute carrier family 27 member 1                                     |
| GARNL3         | 1.31 | 1.09 | ENSG00000136895 | GTPase activating Rap/RanGAP domain like 3                            |
| RPLP0P2        | 1.31 | 1.09 | ENSG00000243742 | ribosomal protein lateral stalk subunit P0 pseudogene 2               |
| LTB            | 1.31 | 5.82 | ENSG00000223448 | lymphotoxin beta                                                      |
| EFCAB12        | 1.31 | 2.67 | ENSG00000172771 | EF-hand calcium binding domain 12                                     |
| RP11-977G19.5  | 1.31 | 3.48 | ENSG00000258199 | N/A                                                                   |
| RP11-356B19.11 | 1.31 | 1.43 | ENSG00000271833 | N/A                                                                   |
| HABP2          | 1.31 | 8.26 | ENSG00000148702 | hyaluronan binding protein 2                                          |

|            |      |      |                 |                                                                                                   |
|------------|------|------|-----------------|---------------------------------------------------------------------------------------------------|
| TGFB3L     | 1.31 | 1.70 | ENSG00000260001 | transforming growth factor beta receptor 3 like                                                   |
| SECTM1     | 1.31 | 1.93 | ENSG00000141574 | secreted and transmembrane 1                                                                      |
| CYP27A1    | 1.31 | 2.59 | ENSG00000135929 | cytochrome P450 family 27 subfamily A member 1                                                    |
| ATP5EP2    | 1.30 | 1.16 | ENSG00000180389 | ATP synthase, H <sup>+</sup> transporting, mitochondrial F1 complex, epsilon subunit pseudogene 2 |
| C15orf52   | 1.30 | 1.16 | ENSG00000188549 | chromosome 15 open reading frame 52                                                               |
| STK39      | 1.30 | 1.16 | ENSG00000198648 | serine/threonine kinase 39                                                                        |
| SEPT3      | 1.30 | 1.48 | ENSG00000100167 | septin 3                                                                                          |
| CTXN1      | 1.30 | 5.13 | ENSG00000178531 | cortexin 1                                                                                        |
| HERC6      | 1.30 | 3.43 | ENSG00000138642 | HECT and RLD domain containing E3 ubiquitin protein ligase family member 6                        |
| PPM1J      | 1.29 | 1.87 | ENSG00000155367 | protein phosphatase, Mg <sup>2+</sup> /Mn <sup>2+</sup> dependent 1J                              |
| LINC00648  | 1.29 | 2.29 | ENSG00000259129 | long intergenic non-protein coding RNA 648                                                        |
| REC8       | 1.29 | 3.20 | ENSG00000100918 | REC8 meiotic recombination protein                                                                |
| SPTBN2     | 1.29 | 3.20 | ENSG00000173898 | spectrin beta, non-erythrocytic 2                                                                 |
| MCOLN3     | 1.29 | 3.00 | ENSG00000055732 | mucolipin 3                                                                                       |
| NEBL       | 1.29 | 3.76 | ENSG00000078114 | nebulette                                                                                         |
| OAS1       | 1.29 | 4.94 | ENSG00000089127 | 2'-5'-oligoadenylate synthetase 1                                                                 |
| PDZD7      | 1.29 | 2.11 | ENSG00000186862 | PDZ domain containing 7                                                                           |
| TMEM182    | 1.29 | 2.11 | ENSG00000170417 | transmembrane protein 182                                                                         |
| CTSH       | 1.29 | 4.66 | ENSG00000103811 | cathepsin H                                                                                       |
| PGM2L1     | 1.29 | 2.78 | ENSG00000165434 | phosphoglucomutase 2 like 1                                                                       |
| PXDC1      | 1.29 | 3.66 | ENSG00000168994 | PX domain containing 1                                                                            |
| NXPH4      | 1.28 | 3.61 | ENSG00000182379 | neurexophilin 4                                                                                   |
| B4GALNT3   | 1.28 | 1.73 | ENSG00000139044 | beta-1,4-N-acetyl-galactosaminyltransferase 3                                                     |
| CADM4      | 1.28 | 5.03 | ENSG00000105767 | cell adhesion molecule 4                                                                          |
| AP001048.4 | 1.28 | 3.33 | ENSG00000223975 | N/A                                                                                               |
| FAM133A    | 1.28 | 3.01 | ENSG00000179083 | family with sequence similarity 133 member A                                                      |

|               |      |      |                 |                                                |
|---------------|------|------|-----------------|------------------------------------------------|
| CACNA1G       | 1.28 | 2.03 | ENSG00000006283 | calcium voltage-gated channel subunit alpha1 G |
| HTR1D         | 1.28 | 2.28 | ENSG00000179546 | 5-hydroxytryptamine receptor 1D                |
| QSOX1         | 1.27 | 8.41 | ENSG00000116260 | quiescin sulfhydryl oxidase 1                  |
| PAGE5         | 1.27 | 4.30 | ENSG00000158639 | PAGE family member 5                           |
| NBL1          | 1.27 | 4.38 | ENSG00000158747 | neuroblastoma 1, DAN family BMP antagonist     |
| LINC00482     | 1.27 | 3.64 | ENSG00000185168 | long intergenic non-protein coding RNA 482     |
| SMKR1         | 1.27 | 1.57 | ENSG00000240204 | small lysine rich protein 1                    |
| NR0B1         | 1.27 | 2.17 | ENSG00000169297 | nuclear receptor subfamily 0 group B member 1  |
| ME3           | 1.26 | 1.94 | ENSG00000151376 | malic enzyme 3                                 |
| RP5-1148A21.3 | 1.26 | 1.94 | ENSG00000266680 | N/A                                            |
| PLEKHB1       | 1.26 | 4.53 | ENSG00000021300 | pleckstrin homology domain containing B1       |
| FUNDC2        | 1.26 | 6.33 | ENSG00000165775 | FUN14 domain containing 2                      |
| B4GALNT4      | 1.26 | 3.97 | ENSG00000182272 | beta-1,4-N-acetyl-galactosaminyltransferase 4  |
| KANK3         | 1.26 | 2.02 | ENSG00000186994 | KN motif and ankyrin repeat domains 3          |
| VIL1          | 1.26 | 7.27 | ENSG00000127831 | villin 1                                       |
| COL5A2        | 1.26 | 4.57 | ENSG00000204262 | collagen type V alpha 2 chain                  |
| COL4A5        | 1.25 | 3.66 | ENSG00000188153 | collagen type IV alpha 5 chain                 |
| PDE9A         | 1.25 | 5.65 | ENSG00000160191 | phosphodiesterase 9A                           |
| MATN2         | 1.25 | 3.29 | ENSG00000132561 | matrilin 2                                     |
| PSMB8         | 1.25 | 2.19 | ENSG00000235715 | proteasome subunit beta 8                      |
| P2RX4         | 1.25 | 6.51 | ENSG00000135124 | purinergic receptor P2X 4                      |
| RP11-497G19.1 | 1.24 | 1.55 | ENSG00000257883 | N/A                                            |
| MIR210HG      | 1.24 | 3.31 | ENSG00000282810 | MIR210 host gene                               |
| LRRC56        | 1.24 | 2.32 | ENSG00000161328 | leucine rich repeat containing 56              |
| RP11-465B22.3 | 1.24 | 2.81 | ENSG00000217801 | N/A                                            |
| SNCB          | 1.24 | 3.34 | ENSG00000074317 | synuclein beta                                 |
| RP11-620J15.3 | 1.24 | 3.73 | ENSG00000257698 | N/A                                            |
| ARHGAP40      | 1.24 | 1.60 | ENSG00000124143 | Rho GTPase activating protein 40               |
| C2CD4C        | 1.24 | 1.60 | ENSG00000183186 | C2 calcium dependent domain containing 4C      |

|               |      |      |                 |                                                                       |
|---------------|------|------|-----------------|-----------------------------------------------------------------------|
| COL11A1       | 1.24 | 1.60 | ENSG00000060718 | collagen type XI alpha 1 chain                                        |
| CNFN          | 1.24 | 4.06 | ENSG00000105427 | cornifelin                                                            |
| RP11-254F7.2  | 1.24 | 1.05 | ENSG00000260077 | N/A                                                                   |
| RP11-571F15.3 | 1.24 | 1.05 | ENSG00000233668 | N/A                                                                   |
| TSPAN5        | 1.24 | 3.25 | ENSG00000168785 | tetraspanin 5                                                         |
| TP53TG1       | 1.23 | 3.57 | ENSG00000182165 | TP53 target 1 (non-protein coding)                                    |
| ADH1A         | 1.23 | 2.11 | ENSG00000187758 | alcohol dehydrogenase 1A (class I),<br>alpha polypeptide              |
| TUBB3         | 1.23 | 3.85 | ENSG00000258947 | tubulin beta 3 class III                                              |
| RSPH9         | 1.23 | 3.34 | ENSG00000172426 | radial spoke head 9 homolog                                           |
| TSNAXIP1      | 1.23 | 1.74 | ENSG00000102904 | translin associated factor X<br>interacting protein 1                 |
| HIST1H1C      | 1.23 | 4.35 | ENSG00000187837 | histone cluster 1 H1 family member<br>c                               |
| GPR35         | 1.23 | 2.18 | ENSG00000178623 | G protein-coupled receptor 35                                         |
| UACA          | 1.23 | 5.41 | ENSG00000137831 | uveal autoantigen with coiled-coil<br>domains and ankyrin repeats     |
| VAMP8         | 1.23 | 8.28 | ENSG00000118640 | vesicle associated membrane protein<br>8                              |
| CTB-171A8.1   | 1.23 | 3.30 | ENSG00000266903 | N/A                                                                   |
| GIPR          | 1.22 | 3.17 | ENSG00000010310 | gastric inhibitory polypeptide<br>receptor                            |
| OSCP1         | 1.22 | 2.69 | ENSG00000116885 | organic solute carrier partner 1                                      |
| FLVCR2        | 1.22 | 1.37 | ENSG00000119686 | feline leukemia virus subgroup C<br>cellular receptor family member 2 |
| ANKDD1A       | 1.22 | 2.39 | ENSG00000166839 | ankyrin repeat and death domain<br>containing 1A                      |
| EGLN3         | 1.22 | 3.13 | ENSG00000129521 | egl-9 family hypoxia inducible factor<br>3                            |
| FBLL1         | 1.22 | 2.13 | ENSG00000188573 | fibrillarin-like 1                                                    |
| RGS9BP        | 1.22 | 1.53 | ENSG00000186326 | regulator of G-protein signaling 9<br>binding protein                 |
| NPTXR         | 1.21 | 1.77 | ENSG00000221890 | neuronal pentraxin receptor                                           |
| C2            | 1.21 | 2.38 | ENSG00000231543 | complement C2                                                         |
| RP11-30J20.1  | 1.21 | 1.82 | ENSG00000254101 | N/A                                                                   |
| C4orf48       | 1.21 | 6.81 | ENSG00000243449 | chromosome 4 open reading frame<br>48                                 |

|             |      |       |                 |                                                                   |
|-------------|------|-------|-----------------|-------------------------------------------------------------------|
| SLC6A16     | 1.20 | 1.94  | ENSG00000063127 | solute carrier family 6 member 16                                 |
| KCNQ1OT1    | 1.20 | 2.55  | ENSG00000269821 | KCNQ1 opposite strand/antisense transcript 1 (non-protein coding) |
| LYPD3       | 1.20 | 3.30  | ENSG00000124466 | LY6/PLAUR domain containing 3                                     |
| CD82        | 1.20 | 2.57  | ENSG00000085117 | CD82 molecule                                                     |
| C12orf75    | 1.20 | 4.73  | ENSG00000235162 | chromosome 12 open reading frame 75                               |
| CLIC2       | 1.20 | 1.02  | ENSG00000155962 | chloride intracellular channel 2                                  |
| CTB-33G10.1 | 1.20 | 1.09  | ENSG00000243829 | N/A                                                               |
| SEMA6B      | 1.19 | 5.91  | ENSG00000167680 | semaphorin 6B                                                     |
| TAX1BP3     | 1.19 | 4.18  | ENSG00000213977 | Tax1 binding protein 3                                            |
| BDKRB1      | 1.19 | 1.29  | ENSG00000100739 | bradykinin receptor B1                                            |
| CD19        | 1.19 | 1.41  | ENSG00000177455 | CD19 molecule                                                     |
| CPM         | 1.19 | 5.27  | ENSG00000135678 | carboxypeptidase M                                                |
| MFSD6       | 1.19 | 3.70  | ENSG00000151690 | major facilitator superfamily domain containing 6                 |
| RASSF6      | 1.19 | 1.57  | ENSG00000169435 | Ras association domain family member 6                            |
| PRELID2     | 1.19 | 3.31  | ENSG00000186314 | PRELI domain containing 2                                         |
| GCA         | 1.19 | 3.85  | ENSG00000115271 | grancalcin                                                        |
| AC027612.6  | 1.18 | 4.03  | ENSG00000143429 | N/A                                                               |
| CLDN9       | 1.18 | 1.96  | ENSG00000213937 | claudin 9                                                         |
| APBB1       | 1.18 | 5.21  | ENSG00000166313 | amyloid beta precursor protein binding family B member 1          |
| GOLM1       | 1.18 | 4.53  | ENSG00000135052 | golgi membrane protein 1                                          |
| MTMR11      | 1.18 | 4.61  | ENSG00000014914 | myotubularin related protein 11                                   |
| CERS1       | 1.18 | 2.24  | ENSG00000223802 | ceramide synthase 1                                               |
| BMP1        | 1.18 | 5.48  | ENSG00000168487 | bone morphogenetic protein 1                                      |
| ESPN        | 1.18 | 4.55  | ENSG00000187017 | espin                                                             |
| TMC4        | 1.18 | 2.61  | ENSG00000277667 | transmembrane channel like 4                                      |
| ZNF385A     | 1.17 | 6.29  | ENSG00000161642 | zinc finger protein 385A                                          |
| ALDOC       | 1.17 | 4.93  | ENSG00000109107 | aldolase, fructose-bisphosphate C                                 |
| KIF17       | 1.17 | 4.06  | ENSG00000117245 | kinesin family member 17                                          |
| DNM1        | 1.16 | 4.64  | ENSG00000106976 | dynamitin 1                                                       |
| TMSB10      | 1.16 | 11.39 | ENSG00000034510 | thymosin beta 10                                                  |
| SERPINI1    | 1.16 | 3.04  | ENSG00000163536 | serpin family I member 1                                          |

|               |      |      |                 |                                                                     |
|---------------|------|------|-----------------|---------------------------------------------------------------------|
| LINC01057     | 1.16 | 2.29 | ENSG00000224081 | long intergenic non-protein coding RNA 1057                         |
| ANKRD1        | 1.16 | 2.03 | ENSG00000148677 | ankyrin repeat domain 1                                             |
| ZNF175        | 1.16 | 1.70 | ENSG00000105497 | zinc finger protein 175                                             |
| ZNF397        | 1.16 | 1.50 | ENSG00000186812 | zinc finger protein 397                                             |
| HAPLN3        | 1.16 | 1.27 | ENSG00000140511 | hyaluronan and proteoglycan link protein 3                          |
| RP11-244H3.1  | 1.16 | 1.27 | ENSG00000241014 | N/A                                                                 |
| GPR153        | 1.16 | 4.16 | ENSG00000158292 | G protein-coupled receptor 153                                      |
| RP11-421L21.3 | 1.16 | 1.21 | ENSG00000233184 | N/A                                                                 |
| RP11-235E17.6 | 1.16 | 1.14 | ENSG00000262903 | N/A                                                                 |
| CHKB-AS1      | 1.16 | 1.07 | ENSG00000205559 | CHKB antisense RNA 1 (head to head)                                 |
| RRAS          | 1.16 | 7.31 | ENSG00000126458 | related RAS viral (r-ras) oncogene homolog                          |
| HHLA3         | 1.16 | 5.02 | ENSG00000197568 | HERV-H LTR-associating 3                                            |
| BNIP3L        | 1.15 | 4.68 | ENSG00000104765 | BCL2 interacting protein 3 like                                     |
| RAB37         | 1.15 | 4.20 | ENSG00000172794 | RAB37, member RAS oncogene family                                   |
| PLCB1         | 1.15 | 2.73 | ENSG00000182621 | phospholipase C beta 1                                              |
| FBXO2         | 1.15 | 5.75 | ENSG00000116661 | F-box protein 2                                                     |
| PPDPF         | 1.15 | 8.05 | ENSG00000125534 | pancreatic progenitor cell differentiation and proliferation factor |
| LIMD2         | 1.15 | 6.21 | ENSG00000136490 | LIM domain containing 2                                             |
| CYP1A1        | 1.15 | 7.29 | ENSG00000140465 | cytochrome P450 family 1 subfamily A member 1                       |
| TCEA1         | 1.14 | 4.11 | ENSG00000187735 | transcription elongation factor A1                                  |
| SAT1          | 1.14 | 7.58 | ENSG00000130066 | spermidine/spermine N1-acetyltransferase 1                          |
| GPR89A        | 1.14 | 1.77 | ENSG00000117262 | G protein-coupled receptor 89A                                      |
| NT5E          | 1.14 | 5.08 | ENSG00000135318 | 5'-nucleotidase ecto                                                |
| VKORC1        | 1.14 | 7.02 | ENSG00000167397 | vitamin K epoxide reductase complex subunit 1                       |
| TPBGL         | 1.14 | 1.63 | ENSG00000261594 | trophoblast glycoprotein-like                                       |
| PLCD1         | 1.14 | 3.98 | ENSG00000187091 | phospholipase C delta 1                                             |
| DMTN          | 1.13 | 3.70 | ENSG00000158856 | dematin actin binding protein                                       |

|                |      |      |                 |                                                                     |
|----------------|------|------|-----------------|---------------------------------------------------------------------|
| FTH1P15        | 1.13 | 1.53 | ENSG00000218980 | ferritin heavy chain 1 pseudogene 15                                |
| MMP19          | 1.13 | 1.53 | ENSG00000123342 | matrix metalloproteinase 19                                         |
| SLC6A8         | 1.13 | 5.18 | ENSG00000130821 | solute carrier family 6 member 8                                    |
| TOM1L2         | 1.13 | 4.29 | ENSG00000175662 | target of myb1 like 2 membrane trafficking protein                  |
| DOK6           | 1.13 | 1.48 | ENSG00000206052 | docking protein 6                                                   |
| ITGA10         | 1.13 | 1.37 | ENSG00000143127 | integrin subunit alpha 10                                           |
| SAMD9          | 1.13 | 1.31 | ENSG00000205413 | sterile alpha motif domain containing 9                             |
| SLC46A3        | 1.13 | 2.14 | ENSG00000139508 | solute carrier family 46 member 3                                   |
| TMC8           | 1.13 | 1.18 | ENSG00000167895 | transmembrane channel like 8                                        |
| ZNF197         | 1.13 | 1.18 | ENSG00000281709 | zinc finger protein 197                                             |
| H19            | 1.12 | 6.43 | ENSG00000130600 | H19, imprinted maternally expressed transcript (non-protein coding) |
| AC010894.3     | 1.12 | 2.04 | ENSG00000226853 | N/A                                                                 |
| CSF1           | 1.12 | 5.34 | ENSG00000184371 | colony stimulating factor 1                                         |
| EGFL7          | 1.12 | 6.99 | ENSG00000172889 | EGF like domain multiple 7                                          |
| RP11-655M14.13 | 1.12 | 1.12 | ENSG00000255318 | N/A                                                                 |
| KREMEN2        | 1.12 | 3.22 | ENSG00000131650 | kringle containing transmembrane protein 2                          |
| RPL39          | 1.12 | 5.88 | ENSG00000198918 | ribosomal protein L39                                               |
| KLC3           | 1.12 | 2.49 | ENSG00000104892 | kinesin light chain 3                                               |
| NUPR1          | 1.12 | 8.47 | ENSG00000176046 | nuclear protein 1, transcriptional regulator                        |
| PTGES3L        | 1.12 | 1.04 | ENSG00000267060 | prostaglandin E synthase 3 like                                     |
| RP11-368P15.3  | 1.12 | 1.04 | ENSG00000258985 | N/A                                                                 |
| RP5-894A10.2   | 1.12 | 1.04 | ENSG00000244701 | N/A                                                                 |
| SLC6A10P       | 1.12 | 1.88 | ENSG00000214617 | solute carrier family 6 member 10, pseudogene                       |
| NACA3P         | 1.12 | 2.41 | ENSG00000121089 | NACA family member 3 pseudogene                                     |
| RCN3           | 1.12 | 7.03 | ENSG00000142552 | reticulocalbin 3                                                    |
| SLC1A3         | 1.12 | 2.38 | ENSG00000079215 | solute carrier family 1 member 3                                    |
| C2orf54        | 1.12 | 2.32 | ENSG00000172478 | chromosome 2 open reading frame 54                                  |
| LPXN           | 1.11 | 2.26 | ENSG00000110031 | leupaxin                                                            |
| ASPH           | 1.11 | 7.35 | ENSG00000198363 | aspartate beta-hydroxylase                                          |

|               |      |      |                 |                                                     |
|---------------|------|------|-----------------|-----------------------------------------------------|
| ORAI3         | 1.11 | 4.56 | ENSG00000175938 | ORAI calcium release-activated calcium modulator 3  |
| CYP4F12       | 1.11 | 4.38 | ENSG00000186204 | cytochrome P450 family 4 subfamily F member 12      |
| SYT3          | 1.11 | 2.51 | ENSG00000213023 | synaptotagmin 3                                     |
| AGPAT4        | 1.11 | 3.27 | ENSG00000026652 | 1-acylglycerol-3-phosphate O-acyltransferase 4      |
| AC106876.2    | 1.11 | 1.57 | ENSG00000222001 | N/A                                                 |
| HYAL1         | 1.11 | 5.49 | ENSG00000114378 | hyaluronoglucosaminidase 1                          |
| SIGIRR        | 1.11 | 6.26 | ENSG00000185187 | single Ig and TIR domain containing                 |
| RP5-1033H22.2 | 1.10 | 1.46 | ENSG00000224093 | N/A                                                 |
| DHRS3         | 1.10 | 7.82 | ENSG00000162496 | dehydrogenase/reductase 3                           |
| CD63          | 1.10 | 9.89 | ENSG00000135404 | CD63 molecule                                       |
| BCAM          | 1.10 | 8.61 | ENSG00000187244 | basal cell adhesion molecule (Lutheran blood group) |
| SLC9A2        | 1.10 | 1.95 | ENSG00000115616 | solute carrier family 9 member A2                   |
| NDUFC2        | 1.10 | 6.57 | ENSG00000151366 | NADH:ubiquinone oxidoreductase subunit C2           |
| RRAGD         | 1.10 | 5.04 | ENSG00000025039 | Ras related GTP binding D                           |
| LBP           | 1.10 | 3.94 | ENSG00000129988 | lipopolysaccharide binding protein                  |
| STX8          | 1.10 | 5.06 | ENSG00000170310 | syntaxin 8                                          |
| PFKP          | 1.10 | 7.46 | ENSG00000067057 | phosphofructokinase, platelet                       |
| FXYD2         | 1.10 | 3.78 | ENSG00000137731 | FXYD domain containing ion transport regulator 2    |
| POLE4         | 1.10 | 4.88 | ENSG00000115350 | DNA polymerase epsilon 4, accessory subunit         |
| GPX3          | 1.10 | 7.66 | ENSG00000211445 | glutathione peroxidase 3                            |
| PDGFB         | 1.10 | 3.64 | ENSG00000100311 | platelet derived growth factor subunit B            |
| TUBA1A        | 1.10 | 3.15 | ENSG00000167552 | tubulin alpha 1a                                    |
| APLP1         | 1.10 | 5.94 | ENSG00000105290 | amyloid beta precursor like protein 1               |
| FAM174B       | 1.09 | 5.81 | ENSG00000185442 | family with sequence similarity 174 member B        |
| ZDHHC1        | 1.09 | 2.15 | ENSG00000159714 | zinc finger DHHC-type containing 1                  |
| PGF           | 1.09 | 2.92 | ENSG00000119630 | placental growth factor                             |
| SCNN1A        | 1.09 | 2.12 | ENSG00000111319 | sodium channel epithelial 1 alpha subunit           |



|               |      |      |                 |                                                          |
|---------------|------|------|-----------------|----------------------------------------------------------|
| MYL9          | 1.09 | 5.86 | ENSG00000101335 | myosin light chain 9                                     |
| CLYBL         | 1.09 | 3.38 | ENSG00000125246 | citrate lyase beta like                                  |
| UCA1          | 1.09 | 8.77 | ENSG00000273782 | Urothelial cancer associated 1 conserved region          |
| COL21A1       | 1.09 | 2.08 | ENSG00000124749 | collagen type XXI alpha 1 chain                          |
| FTH1P23       | 1.09 | 1.16 | ENSG00000242960 | ferritin heavy chain 1 pseudogene 23                     |
| ARHGAP18      | 1.09 | 2.84 | ENSG00000146376 | Rho GTPase activating protein 18                         |
| CAPG          | 1.09 | 1.09 | ENSG00000042493 | capping actin protein, gelsolin like                     |
| RP11-587P21.2 | 1.09 | 2.30 | ENSG00000257893 | N/A                                                      |
| RP13-104F24.3 | 1.08 | 1.60 | ENSG00000265298 | N/A                                                      |
| LINC00205     | 1.08 | 3.71 | ENSG00000223768 | long intergenic non-protein coding RNA 205               |
| COMMD6        | 1.08 | 6.27 | ENSG00000188243 | COMM domain containing 6                                 |
| STAT1         | 1.08 | 6.99 | ENSG00000115415 | signal transducer and activator of transcription 1       |
| SH2D3A        | 1.08 | 2.71 | ENSG00000125731 | SH2 domain containing 3A                                 |
| FCGBP         | 1.08 | 1.94 | ENSG00000281123 | Fc fragment of IgG binding protein                       |
| CYB5R2        | 1.08 | 1.02 | ENSG00000166394 | cytochrome b5 reductase 2                                |
| FAM86B3P      | 1.08 | 1.02 | ENSG00000173295 | family with sequence similarity 86 member B3, pseudogene |
| SLC30A3       | 1.08 | 4.10 | ENSG00000115194 | solute carrier family 30 member 3                        |
| LINC00649     | 1.08 | 3.04 | ENSG00000237945 | long intergenic non-protein coding RNA 649               |
| NRCAM         | 1.08 | 2.47 | ENSG00000091129 | neuronal cell adhesion molecule                          |
| SYT17         | 1.08 | 2.47 | ENSG00000103528 | synaptotagmin 17                                         |
| OCIAD2        | 1.08 | 1.50 | ENSG00000145247 | OCIA domain containing 2                                 |
| C14orf132     | 1.08 | 4.84 | ENSG00000227051 | chromosome 14 open reading frame 132                     |
| PGBD4         | 1.08 | 1.86 | ENSG00000182405 | piggyBac transposable element derived 4                  |
| SERPING1      | 1.08 | 8.01 | ENSG00000149131 | serpin family G member 1                                 |
| RP11-297L17.2 | 1.07 | 3.90 | ENSG00000260963 | N/A                                                      |
| VAMP5         | 1.07 | 3.95 | ENSG00000168899 | vesicle associated membrane protein 5                    |
| GOLGA7B       | 1.07 | 4.74 | ENSG00000155265 | golgin A7 family member B                                |
| AP001469.9    | 1.07 | 2.89 | ENSG00000239415 | N/A                                                      |

|                 |      |       |                 |                                                            |
|-----------------|------|-------|-----------------|------------------------------------------------------------|
| EFEMP2          | 1.07 | 3.84  | ENSG00000172638 | EGF containing fibulin like extracellular matrix protein 2 |
| ASMTL-AS1       | 1.07 | 2.04  | ENSG00000236017 | ASMTL antisense RNA 1                                      |
| TF              | 1.07 | 12.08 | ENSG00000091513 | transferrin                                                |
| DSCR4-IT1       | 1.07 | 1.73  | ENSG00000223608 | DSCR4 intronic transcript 1                                |
| XXyac-YM21GA2.4 | 1.07 | 1.33  | ENSG00000234460 | N/A                                                        |
| GPX8            | 1.07 | 3.71  | ENSG00000164294 | glutathione peroxidase 8 (putative)                        |
| HK1             | 1.06 | 4.33  | ENSG00000156515 | hexokinase 1                                               |
| PLXNA2          | 1.06 | 4.48  | ENSG00000076356 | plexin A2                                                  |
| FBXO25          | 1.06 | 4.42  | ENSG00000147364 | F-box protein 25                                           |
| ITGA2B          | 1.06 | 1.27  | ENSG00000005961 | integrin subunit alpha 2b                                  |
| RP11-420A23.1   | 1.06 | 2.20  | ENSG00000251432 | N/A                                                        |
| RP11-140K17.3   | 1.06 | 3.94  | ENSG00000272288 | N/A                                                        |
| HCFC1R1         | 1.06 | 7.70  | ENSG00000103145 | host cell factor C1 regulator 1                            |
| ZSWIM4          | 1.06 | 4.03  | ENSG00000132003 | zinc finger SWIM-type containing 4                         |
| THBS3           | 1.06 | 3.83  | ENSG00000169231 | thrombospondin 3                                           |
| HDX             | 1.06 | 1.20  | ENSG00000165259 | highly divergent homeobox                                  |
| RP11-686O6.2    | 1.06 | 1.20  | ENSG00000273456 | N/A                                                        |
| RP11-408P14.1   | 1.06 | 1.58  | ENSG00000243199 | N/A                                                        |
| RNF181          | 1.06 | 7.80  | ENSG00000168894 | ring finger protein 181                                    |
| TSPAN8          | 1.06 | 4.89  | ENSG00000127324 | tetraspanin 8                                              |
| PLA2G12B        | 1.06 | 3.17  | ENSG00000138308 | phospholipase A2 group XIIB                                |
| LIPH            | 1.05 | 5.47  | ENSG00000163898 | lipase H                                                   |
| RPL39L          | 1.05 | 4.01  | ENSG00000163923 | ribosomal protein L39 like                                 |
| DSG2            | 1.05 | 3.75  | ENSG00000046604 | desmoglein 2                                               |
| APOL6           | 1.05 | 2.06  | ENSG00000221963 | apolipoprotein L6                                          |
| RHOC            | 1.05 | 8.70  | ENSG00000155366 | ras homolog family member C                                |
| DTX3            | 1.05 | 3.18  | ENSG00000178498 | deltex E3 ubiquitin ligase 3                               |
| SPINT2          | 1.05 | 6.91  | ENSG00000167642 | serine peptidase inhibitor, Kunitz type 2                  |
| TMED6           | 1.05 | 1.99  | ENSG00000157315 | transmembrane p24 trafficking protein 6                    |
| ETNK2           | 1.04 | 4.77  | ENSG00000143845 | ethanolamine kinase 2                                      |
| CLVS1           | 1.04 | 2.52  | ENSG00000177182 | clavesin 1                                                 |
| CORO7           | 1.04 | 4.31  | ENSG00000262246 | coronin 7                                                  |
| SLC2A14         | 1.04 | 1.95  | ENSG00000173262 | solute carrier family 2 member 14                          |

|               |      |       |                 |                                                          |
|---------------|------|-------|-----------------|----------------------------------------------------------|
| LTBP2         | 1.04 | 3.32  | ENSG00000119681 | latent transforming growth factor beta binding protein 2 |
| CTSD          | 1.04 | 10.13 | ENSG00000117984 | cathepsin D                                              |
| ATP2B4        | 1.04 | 2.49  | ENSG00000058668 | ATPase plasma membrane Ca <sup>2+</sup> transporting 4   |
| SERPINC1      | 1.04 | 1.91  | ENSG00000117601 | serpin family C member 1                                 |
| SMIM1         | 1.04 | 3.65  | ENSG00000235169 | small integral membrane protein 1 (Vel blood group)      |
| MYOF          | 1.04 | 3.90  | ENSG00000138119 | myoferlin                                                |
| FCHSD1        | 1.04 | 5.05  | ENSG00000197948 | FCH and double SH3 domains 1                             |
| FOXQ1         | 1.04 | 2.59  | ENSG00000164379 | forkhead box Q1                                          |
| EMID1         | 1.04 | 2.56  | ENSG00000186998 | EMI domain containing 1                                  |
| ABTB1         | 1.03 | 4.71  | ENSG00000114626 | ankyrin repeat and BTB domain containing 1               |
| ABCC3         | 1.03 | 3.35  | ENSG00000108846 | ATP binding cassette subfamily C member 3                |
| SH3BGR13      | 1.03 | 8.29  | ENSG00000142669 | SH3 domain binding glutamate rich protein like 3         |
| DOK1          | 1.03 | 2.21  | ENSG00000115325 | docking protein 1                                        |
| MAP4K1        | 1.03 | 1.57  | ENSG00000282928 | mitogen-activated protein kinase kinase kinase 1         |
| RP11-218M22.1 | 1.03 | 1.57  | ENSG00000177406 | N/A                                                      |
| HLA-G         | 1.03 | 2.76  | ENSG00000235680 | major histocompatibility complex, class I, G             |
| MFS7          | 1.03 | 1.25  | ENSG00000169026 | major facilitator superfamily domain containing 7        |
| HOTAIRM1      | 1.03 | 6.06  | ENSG00000233429 | HOXA transcript antisense RNA, myeloid-specific 1        |
| FOXN3-AS1     | 1.03 | 2.17  | ENSG00000258920 | FOXN3 antisense RNA 1                                    |
| GNAZ          | 1.03 | 2.17  | ENSG00000128266 | G protein subunit alpha z                                |
| TXNRD3        | 1.02 | 2.29  | ENSG00000197763 | thioredoxin reductase 3                                  |
| HSPB1         | 1.02 | 9.88  | ENSG00000106211 | heat shock protein family B (small) member 1             |
| NTN5          | 1.02 | 1.18  | ENSG00000142233 | netrin 5                                                 |
| RGS9          | 1.02 | 1.18  | ENSG00000108370 | regulator of G-protein signaling 9                       |
| CERCAM        | 1.02 | 6.57  | ENSG00000167123 | cerebral endothelial cell adhesion molecule              |
| DNAAF3        | 1.02 | 3.58  | ENSG00000167646 | dynein axonemal assembly factor 3                        |

|              |      |      |                 |                                                                |
|--------------|------|------|-----------------|----------------------------------------------------------------|
| C20orf196    | 1.02 | 2.26 | ENSG00000171984 | chromosome 20 open reading frame 196                           |
| KCNK6        | 1.02 | 2.87 | ENSG00000099337 | potassium two pore domain channel subfamily K member 6         |
| FAHD2CP      | 1.02 | 2.53 | ENSG00000231584 | fumarylacetoacetate hydrolase domain containing 2C, pseudogene |
| GDA          | 1.02 | 5.62 | ENSG00000119125 | guanine deaminase                                              |
| KRT19        | 1.02 | 3.28 | ENSG00000171345 | keratin 19                                                     |
| FAXDC2       | 1.02 | 2.07 | ENSG00000170271 | fatty acid hydroxylase domain containing 2                     |
| PLEKHG5      | 1.02 | 3.03 | ENSG00000171680 | pleckstrin homology and RhoGEF domain containing G5            |
| LINC00862    | 1.02 | 1.11 | ENSG00000203721 | long intergenic non-protein coding RNA 862                     |
| CLDN3        | 1.02 | 3.18 | ENSG00000165215 | claudin 3                                                      |
| RDH12        | 1.01 | 1.85 | ENSG00000139988 | retinol dehydrogenase 12 (all-trans/9-cis/11-cis)              |
| PRRX2        | 1.01 | 2.20 | ENSG00000167157 | paired related homeobox 2                                      |
| HILPDA       | 1.01 | 5.46 | ENSG00000135245 | hypoxia inducible lipid droplet associated                     |
| RBM11        | 1.01 | 2.71 | ENSG00000185272 | RNA binding motif protein 11                                   |
| PDZD11       | 1.01 | 7.30 | ENSG00000120509 | PDZ domain containing 11                                       |
| UCHL3        | 1.01 | 3.68 | ENSG00000118939 | ubiquitin C-terminal hydrolase L3                              |
| TMEM8B       | 1.01 | 4.40 | ENSG00000137103 | transmembrane protein 8B                                       |
| SYT5         | 1.01 | 5.68 | ENSG00000129990 | synaptotagmin 5                                                |
| DEPTOR       | 1.01 | 2.89 | ENSG00000155792 | DEP domain containing MTOR-interacting protein                 |
| TMEM187      | 1.01 | 2.89 | ENSG00000177854 | transmembrane protein 187                                      |
| ST3GAL1      | 1.01 | 3.80 | ENSG00000008513 | ST3 beta-galactoside alpha-2,3-sialyltransferase 1             |
| TM4SF5       | 1.01 | 9.01 | ENSG00000142484 | transmembrane 4 L six family member 5                          |
| ADRB1        | 1.01 | 1.04 | ENSG00000043591 | adrenoceptor beta 1                                            |
| GUCA2A       | 1.01 | 1.04 | ENSG00000197273 | guanylate cyclase activator 2A                                 |
| RP11-10K16.1 | 1.01 | 1.04 | ENSG00000245213 | N/A                                                            |
| C12orf57     | 1.01 | 6.31 | ENSG00000111678 | chromosome 12 open reading frame 57                            |
| TNS1         | 1.01 | 3.83 | ENSG00000079308 | tensin 1                                                       |

|               |      |       |                 |                                                                            |
|---------------|------|-------|-----------------|----------------------------------------------------------------------------|
| NDUFA13       | 1.01 | 5.17  | ENSG00000186010 | NADH:ubiquinone oxidoreductase subunit A13                                 |
| OSER1-AS1     | 1.01 | 1.96  | ENSG00000223891 | OSER1 antisense RNA 1 (head to head)                                       |
| SEPT5         | 1.01 | 2.63  | ENSG00000184702 | septin 5                                                                   |
| SLC44A2       | 1.01 | 5.91  | ENSG00000129353 | solute carrier family 44 member 2                                          |
| TMCC2         | 1.01 | 3.23  | ENSG00000133069 | transmembrane and coiled-coil domain family 2                              |
| TPM2          | 1.00 | 10.78 | ENSG00000198467 | tropomyosin 2 (beta)                                                       |
| IGSF1         | 1.00 | 3.16  | ENSG00000147255 | immunoglobulin superfamily member 1                                        |
| SLC4A4        | 1.00 | 3.80  | ENSG00000080493 | solute carrier family 4 member 4                                           |
| VASH2         | 1.00 | 2.25  | ENSG00000143494 | vasohibin 2                                                                |
| ERCC6         | 1.00 | 2.09  | ENSG00000225830 | ERCC excision repair 6, chromatin remodeling factor                        |
| MICAL2        | 1.00 | 2.49  | ENSG00000133816 | microtubule associated monooxygenase, calponin and LIM domain containing 2 |
| IGFBP4        | 1.00 | 4.75  | ENSG00000141753 | insulin like growth factor binding protein 4                               |
| CROCCP3       | 1.00 | 1.29  | ENSG00000080947 | ciliary rootlet coiled-coil, rootletin pseudogene 3                        |
| MAP1B         | 1.00 | 1.29  | ENSG00000131711 | microtubule associated protein 1B                                          |
| ZCCHC24       | 1.00 | 3.20  | ENSG00000165424 | zinc finger CCHC-type containing 24                                        |
| SULT2B1       | 1.00 | 3.99  | ENSG00000088002 | sulfotransferase family 2B member 1                                        |
| NPDC1         | 1.00 | 2.88  | ENSG00000107281 | neural proliferation, differentiation and control 1                        |
| RP11-503C24.6 | 1.00 | 3.55  | ENSG00000224417 | N/A                                                                        |
| RGS20         | 1.00 | 3.02  | ENSG00000147509 | regulator of G-protein signaling 20                                        |
| NUDT14        | 1.00 | 4.19  | ENSG00000183828 | nudix hydrolase 14                                                         |
| TCEAL3        | 1.00 | 1.88  | ENSG00000196507 | transcription elongation factor A like 3                                   |
| ANG           | 1.00 | 4.99  | ENSG00000214274 | angiogenin                                                                 |
| PARM1         | 1.00 | 4.18  | ENSG00000169116 | prostate androgen-regulated mucin-like protein 1                           |
| RP11-758M4.4  | 0.99 | 1.22  | ENSG00000253706 | N/A                                                                        |
| ZNF362        | 0.99 | 2.98  | ENSG00000160094 | zinc finger protein 362                                                    |

|               |      |      |                 |                                                                    |
|---------------|------|------|-----------------|--------------------------------------------------------------------|
| RP11-469A15.2 | 0.99 | 2.15 | ENSG00000230623 | N/A                                                                |
| NUDT18        | 0.99 | 4.24 | ENSG00000275074 | nudix hydrolase 18                                                 |
| SLC2A4        | 0.99 | 4.03 | ENSG00000181856 | solute carrier family 2 member 4                                   |
| SDC3          | 0.99 | 5.25 | ENSG00000162512 | syndecan 3                                                         |
| SLC22A31      | 0.99 | 4.71 | ENSG00000259803 | solute carrier family 22 member 31                                 |
| VMAC          | 0.99 | 1.63 | ENSG00000187650 | vimentin-type intermediate filament associated coiled-coil protein |
| SPA17         | 0.99 | 2.12 | ENSG00000064199 | sperm autoantigenic protein 17                                     |
| ZP3           | 0.99 | 3.96 | ENSG00000188372 | zona pellucida glycoprotein 3                                      |
| RASGRP3       | 0.99 | 3.08 | ENSG00000152689 | RAS guanyl releasing protein 3                                     |
| LMX1B         | 0.99 | 1.80 | ENSG00000136944 | LIM homeobox transcription factor 1 beta                           |
| GPRASP2       | 0.99 | 1.16 | ENSG00000158301 | G protein-coupled receptor associated sorting protein 2            |
| SYNE1         | 0.99 | 2.35 | ENSG00000131018 | spectrin repeat containing nuclear envelope protein 1              |
| WIPF3         | 0.99 | 3.97 | ENSG00000122574 | WAS/WASL interacting protein family member 3                       |
| MFSD2B        | 0.98 | 1.39 | ENSG00000205639 | major facilitator superfamily domain containing 2B                 |
| PCSK1N        | 0.98 | 8.74 | ENSG00000102109 | proprotein convertase subtilisin/kexin type 1 inhibitor            |
| GAS2L3        | 0.98 | 4.93 | ENSG00000139354 | growth arrest specific 2 like 3                                    |
| RTN4RL1       | 0.98 | 1.58 | ENSG00000185924 | reticulon 4 receptor like 1                                        |
| ABHD12        | 0.98 | 7.66 | ENSG00000100997 | abhydrolase domain containing 12                                   |
| NES           | 0.98 | 3.86 | ENSG00000132688 | nestin                                                             |
| ARHGEF25      | 0.98 | 4.43 | ENSG00000240771 | Rho guanine nucleotide exchange factor 25                          |
| RP11-1L9.1    | 0.98 | 2.17 | ENSG00000226434 | N/A                                                                |
| FSD1          | 0.98 | 4.26 | ENSG00000105255 | fibronectin type III and SPRY domain containing 1                  |
| ARG1          | 0.98 | 1.09 | ENSG00000118520 | arginase 1                                                         |
| IGDCC4        | 0.98 | 1.09 | ENSG00000103742 | immunoglobulin superfamily DCC subclass member 4                   |
| TIMD4         | 0.98 | 1.09 | ENSG00000145850 | T-cell immunoglobulin and mucin domain containing 4                |
| IDUA          | 0.98 | 5.03 | ENSG00000127415 | iduronidase, alpha-L-                                              |

|               |      |      |                 |                                                                                 |
|---------------|------|------|-----------------|---------------------------------------------------------------------------------|
| TMEM256       | 0.98 | 5.86 | ENSG00000205544 | transmembrane protein 256                                                       |
| SLC4A11       | 0.98 | 5.75 | ENSG00000088836 | solute carrier family 4 member 11                                               |
| C12orf60      | 0.98 | 1.87 | ENSG00000182993 | chromosome 12 open reading frame 60                                             |
| RBM24         | 0.98 | 1.87 | ENSG00000112183 | RNA binding motif protein 24                                                    |
| S100A13       | 0.97 | 3.95 | ENSG00000189171 | S100 calcium binding protein A13                                                |
| TSPAN15       | 0.97 | 5.36 | ENSG00000099282 | tetraspanin 15                                                                  |
| TNFRSF10C     | 0.97 | 3.53 | ENSG00000173535 | TNF receptor superfamily member 10c                                             |
| UCHL1         | 0.97 | 7.05 | ENSG00000154277 | ubiquitin C-terminal hydrolase L1                                               |
| CYP2C18       | 0.97 | 2.23 | ENSG00000108242 | cytochrome P450 family 2 subfamily C member 18                                  |
| KALRN         | 0.97 | 1.97 | ENSG00000160145 | kalirin, RhoGEF kinase                                                          |
| MAPRE3        | 0.97 | 4.90 | ENSG00000084764 | microtubule associated protein RP/EB family member 3                            |
| FMO5          | 0.97 | 4.18 | ENSG00000131781 | flavin containing monooxygenase 5                                               |
| CTD-2162K18.4 | 0.97 | 1.27 | ENSG00000267260 | N/A                                                                             |
| IGIP          | 0.97 | 1.27 | ENSG00000182700 | IgA inducing protein                                                            |
| OVOL2         | 0.97 | 1.27 | ENSG00000125850 | ovo like zinc finger 2                                                          |
| C1QL1         | 0.97 | 7.76 | ENSG00000131094 | complement C1q like 1                                                           |
| CD70          | 0.97 | 4.35 | ENSG00000125726 | CD70 molecule                                                                   |
| PKD2          | 0.96 | 4.05 | ENSG00000118762 | polycystin 2, transient receptor potential cation channel                       |
| RP1-266L20.2  | 0.96 | 1.93 | ENSG00000281625 | N/A                                                                             |
| RP13-516M14.1 | 0.96 | 2.39 | ENSG00000260563 | N/A                                                                             |
| LAMA3         | 0.96 | 5.90 | ENSG00000053747 | laminin subunit alpha 3                                                         |
| TGFBI         | 0.96 | 9.15 | ENSG00000120708 | transforming growth factor beta induced                                         |
| RGS10         | 0.96 | 4.05 | ENSG00000148908 | regulator of G-protein signaling 10                                             |
| PARVA         | 0.96 | 3.06 | ENSG00000197702 | parvin alpha                                                                    |
| CDS1          | 0.96 | 2.71 | ENSG00000163624 | CDP-diacylglycerol synthase 1                                                   |
| RIMKLA        | 0.96 | 3.11 | ENSG00000177181 | ribosomal modification protein rimK like family member A                        |
| PRRG2         | 0.96 | 3.04 | ENSG00000126460 | proline rich and Gla domain 2                                                   |
| PPM1N         | 0.96 | 3.21 | ENSG00000213889 | protein phosphatase, Mg <sup>2+</sup> /Mn <sup>2+</sup> dependent 1N (putative) |

|              |      |      |                 |                                                         |
|--------------|------|------|-----------------|---------------------------------------------------------|
| CIB2         | 0.96 | 5.86 | ENSG00000136425 | calcium and integrin binding family member 2            |
| DNASE1       | 0.95 | 3.92 | ENSG00000213918 | deoxyribonuclease 1                                     |
| AKR1C3       | 0.95 | 6.90 | ENSG00000196139 | aldo-keto reductase family 1 member C3                  |
| GPC4         | 0.95 | 1.37 | ENSG00000076716 | glypican 4                                              |
| TRIM55       | 0.95 | 1.37 | ENSG00000147573 | tripartite motif containing 55                          |
| PPP3CA       | 0.95 | 4.25 | ENSG00000138814 | protein phosphatase 3 catalytic subunit alpha           |
| GPR157       | 0.95 | 6.56 | ENSG00000180758 | G protein-coupled receptor 157                          |
| NOXA1        | 0.95 | 2.79 | ENSG00000188747 | NADPH oxidase activator 1                               |
| FZD2         | 0.95 | 5.27 | ENSG00000180340 | frizzled class receptor 2                               |
| SH3RF2       | 0.95 | 4.70 | ENSG00000156463 | SH3 domain containing ring finger 2                     |
| CACNG8       | 0.95 | 3.15 | ENSG00000142408 | calcium voltage-gated channel auxiliary subunit gamma 8 |
| S100A11      | 0.95 | 7.57 | ENSG00000163191 | S100 calcium binding protein A11                        |
| MR1          | 0.94 | 4.12 | ENSG00000153029 | major histocompatibility complex, class I-related       |
| UPK1B        | 0.94 | 3.59 | ENSG00000114638 | uroplakin 1B                                            |
| RP11-319G6.1 | 0.94 | 1.31 | ENSG00000248932 | N/A                                                     |
| RAB4B        | 0.94 | 5.23 | ENSG00000167578 | RAB4B, member RAS oncogene family                       |
| NPC2         | 0.94 | 7.82 | ENSG00000119655 | NPC intracellular cholesterol transporter 2             |
| DRD4         | 0.94 | 2.43 | ENSG00000069696 | dopamine receptor D4                                    |
| SEMA7A       | 0.94 | 1.77 | ENSG00000138623 | semaphorin 7A (John Milton Hagen blood group)           |
| TCEAL8       | 0.94 | 1.77 | ENSG00000180964 | transcription elongation factor A like 8                |
| EDN1         | 0.94 | 3.68 | ENSG00000078401 | endothelin 1                                            |
| RNF39        | 0.94 | 1.07 | ENSG00000230467 | ring finger protein 39                                  |
| RASIP1       | 0.94 | 1.88 | ENSG00000105538 | Ras interacting protein 1                               |
| DGAT2        | 0.94 | 4.86 | ENSG00000062282 | diacylglycerol O-acyltransferase 2                      |
| LRRC73       | 0.93 | 2.70 | ENSG00000204052 | leucine rich repeat containing 73                       |
| ETFB         | 0.93 | 6.38 | ENSG00000105379 | electron transfer flavoprotein beta subunit             |
| BCHE         | 0.93 | 1.24 | ENSG00000114200 | butyrylcholinesterase                                   |



|              |      |      |                 |                                                                   |
|--------------|------|------|-----------------|-------------------------------------------------------------------|
| LPCAT2       | 0.93 | 1.24 | ENSG00000087253 | lysophosphatidylcholine acyltransferase 2                         |
| ODF3B        | 0.93 | 1.24 | ENSG00000177989 | outer dense fiber of sperm tails 3B                               |
| ABLIM2       | 0.93 | 2.54 | ENSG00000163995 | actin binding LIM protein family member 2                         |
| HEXB         | 0.93 | 7.66 | ENSG00000049860 | hexosaminidase subunit beta                                       |
| SLC43A2      | 0.93 | 4.46 | ENSG00000278550 | solute carrier family 43 member 2                                 |
| CD81         | 0.93 | 8.26 | ENSG00000110651 | CD81 molecule                                                     |
| CGREF1       | 0.93 | 3.83 | ENSG00000138028 | cell growth regulator with EF-hand domain 1                       |
| NPNT         | 0.93 | 3.86 | ENSG00000168743 | nephronectin                                                      |
| PLEKHO1      | 0.93 | 4.45 | ENSG00000023902 | pleckstrin homology domain containing O1                          |
| RECK         | 0.93 | 3.09 | ENSG00000122707 | reversion inducing cysteine rich protein with kazal motifs        |
| RP4-639F20.1 | 0.93 | 3.52 | ENSG00000235501 | N/A                                                               |
| ISYNA1       | 0.92 | 7.22 | ENSG00000105655 | inositol-3-phosphate synthase 1                                   |
| ATOX1        | 0.92 | 7.65 | ENSG00000177556 | antioxidant 1 copper chaperone                                    |
| NDUFB11      | 0.92 | 9.01 | ENSG00000147123 | NADH:ubiquinone oxidoreductase subunit B11                        |
| HECA         | 0.92 | 2.56 | ENSG00000112406 | hdc homolog, cell cycle regulator                                 |
| RP11-14N7.2  | 0.92 | 2.23 | ENSG00000232527 | N/A                                                               |
| TTC39A       | 0.92 | 1.80 | ENSG00000085831 | tetratricopeptide repeat domain 39A                               |
| SYTL4        | 0.92 | 2.94 | ENSG00000102362 | synaptotagmin like 4                                              |
| FBXL8        | 0.92 | 1.91 | ENSG00000135722 | F-box and leucine rich repeat protein 8                           |
| NLGN3        | 0.92 | 1.91 | ENSG00000196338 | neuroligin 3                                                      |
| ZNF358       | 0.92 | 7.19 | ENSG00000198816 | zinc finger protein 358                                           |
| ROBO3        | 0.92 | 1.35 | ENSG00000154134 | roundabout guidance receptor 3                                    |
| GCNT3        | 0.92 | 5.15 | ENSG00000140297 | glucosaminyl (N-acetyl) transferase 3, mucin type                 |
| ACSF2        | 0.92 | 6.24 | ENSG00000167107 | acyl-CoA synthetase family member 2                               |
| SERPINF2     | 0.92 | 8.71 | ENSG00000167711 | serpin family F member 2                                          |
| TXNDC16      | 0.92 | 1.63 | ENSG00000087301 | thioredoxin domain containing 16                                  |
| NEDD9        | 0.92 | 5.65 | ENSG00000111859 | neural precursor cell expressed, developmentally down-regulated 9 |

|               |      |      |                 |                                                       |
|---------------|------|------|-----------------|-------------------------------------------------------|
| SLC6A12       | 0.91 | 5.41 | ENSG00000111181 | solute carrier family 6 member 12                     |
| FKBP1A        | 0.91 | 8.50 | ENSG00000088832 | FK506 binding protein 1A                              |
| CRELD1        | 0.91 | 5.11 | ENSG00000163703 | cysteine rich with EGF like domains<br>1              |
| TMEM151A      | 0.91 | 5.44 | ENSG00000179292 | transmembrane protein 151A                            |
| AKR1B1        | 0.91 | 4.67 | ENSG00000085662 | aldo-keto reductase family 1 member<br>B              |
| ZNF93         | 0.91 | 1.11 | ENSG00000184635 | zinc finger protein 93                                |
| TMSB4X        | 0.91 | 7.61 | ENSG00000205542 | thymosin beta 4, X-linked                             |
| PLOD2         | 0.91 | 4.92 | ENSG00000152952 | procollagen-lysine,2-oxoglutarate 5-<br>dioxygenase 2 |
| NEIL1         | 0.91 | 3.54 | ENSG00000140398 | nei like DNA glycosylase 1                            |
| NUCB1         | 0.91 | 9.61 | ENSG00000104805 | nucleobindin 1                                        |
| SLC16A2       | 0.91 | 5.02 | ENSG00000147100 | solute carrier family 16 member 2                     |
| EVA1B         | 0.91 | 4.49 | ENSG00000142694 | eva-1 homolog B                                       |
| GCKR          | 0.91 | 4.49 | ENSG00000084734 | glucokinase regulator                                 |
| RP11-103J17.2 | 0.91 | 1.29 | ENSG00000261761 | N/A                                                   |
| STOX1         | 0.91 | 1.29 | ENSG00000165730 | storkhead box 1                                       |
| AC079922.3    | 0.91 | 1.44 | ENSG00000237753 | N/A                                                   |
| PSMB9         | 0.91 | 1.44 | ENSG00000239836 | proteasome subunit beta 9                             |
| NRTN          | 0.91 | 5.15 | ENSG00000171119 | neurturin                                             |
| DOC2A         | 0.91 | 1.58 | ENSG00000149927 | double C2 domain alpha                                |
| C16orf52      | 0.91 | 2.91 | ENSG00000185716 | chromosome 16 open reading frame<br>52                |
| ANTXR2        | 0.91 | 3.65 | ENSG00000163297 | anthrax toxin receptor 2                              |
| TMEM150B      | 0.91 | 3.28 | ENSG00000180061 | transmembrane protein 150B                            |
| DLX4          | 0.91 | 2.22 | ENSG00000108813 | distal-less homeobox 4                                |
| RP1-159A19.3  | 0.91 | 2.22 | ENSG00000235912 | N/A                                                   |
| MST1L         | 0.91 | 2.30 | ENSG00000186715 | macrophage stimulating 1 like                         |
| BAIAP3        | 0.91 | 4.33 | ENSG00000007516 | BAI1 associated protein 3                             |
| PLIN2         | 0.90 | 7.47 | ENSG00000147872 | perilipin 2                                           |
| CST3          | 0.90 | 8.44 | ENSG00000101439 | cystatin C                                            |
| ARHGEF28      | 0.90 | 4.76 | ENSG00000214944 | Rho guanine nucleotide exchange<br>factor 28          |
| RP11-150O12.3 | 0.90 | 2.27 | ENSG00000254290 | N/A                                                   |
| SNCA          | 0.90 | 1.89 | ENSG00000145335 | synuclein alpha                                       |

|               |      |      |                 |                                                                   |
|---------------|------|------|-----------------|-------------------------------------------------------------------|
| LINC00944     | 0.90 | 1.66 | ENSG00000256128 | long intergenic non-protein coding RNA 944                        |
| PPFIA4        | 0.90 | 1.66 | ENSG00000143847 | PTPRF interacting protein alpha 4                                 |
| BCAN          | 0.90 | 1.38 | ENSG00000132692 | brevican                                                          |
| C14orf159     | 0.90 | 1.38 | ENSG00000133943 | chromosome 14 open reading frame 159                              |
| AGPAT2        | 0.90 | 7.59 | ENSG00000169692 | 1-acylglycerol-3-phosphate O-acyltransferase 2                    |
| HLA-E         | 0.90 | 7.29 | ENSG00000225201 | major histocompatibility complex, class I, E                      |
| TLE2          | 0.90 | 5.43 | ENSG00000065717 | transducin like enhancer of split 2                               |
| YIPF1         | 0.90 | 5.94 | ENSG00000058799 | Yip1 domain family member 1                                       |
| HCAR2         | 0.90 | 1.04 | ENSG00000182782 | hydroxycarboxylic acid receptor 2                                 |
| PRORS1P       | 0.90 | 1.04 | ENSG00000162997 | prolyl-tRNA synthetase associated domain containing 1, pseudogene |
| RP11-359B12.2 | 0.90 | 1.04 | ENSG00000250132 | N/A                                                               |
| PTPRH         | 0.90 | 4.65 | ENSG00000080031 | protein tyrosine phosphatase, receptor type H                     |
| RASL11A       | 0.90 | 4.22 | ENSG00000122035 | RAS like family 11 member A                                       |
| HSD11B1L      | 0.90 | 4.83 | ENSG00000167733 | hydroxysteroid 11-beta dehydrogenase 1 like                       |
| DGKA          | 0.89 | 3.79 | ENSG00000065357 | diacylglycerol kinase alpha                                       |
| FOXD2-AS1     | 0.89 | 3.97 | ENSG00000237424 | FOXD2 antisense RNA 1 (head to head)                              |
| TSPEAR-AS1    | 0.89 | 1.74 | ENSG00000235890 | TSPEAR antisense RNA 1                                            |
| FAM71E1       | 0.89 | 1.61 | ENSG00000142530 | family with sequence similarity 71 member E1                      |
| NAT14         | 0.89 | 6.40 | ENSG00000090971 | N-acetyltransferase 14 (putative)                                 |
| HLA-A         | 0.89 | 9.04 | ENSG00000224320 | major histocompatibility complex, class I, A                      |
| FN3K          | 0.89 | 5.68 | ENSG00000167363 | fructosamine 3 kinase                                             |
| BMP6          | 0.89 | 5.71 | ENSG00000153162 | bone morphogenetic protein 6                                      |
| RP11-452L6.5  | 0.89 | 2.21 | ENSG00000260267 | N/A                                                               |
| VAMP2         | 0.89 | 5.15 | ENSG00000220205 | vesicle associated membrane protein 2                             |
| ZNF880        | 0.89 | 1.33 | ENSG00000221923 | zinc finger protein 880                                           |
| RP11-404P21.3 | 0.89 | 4.34 | ENSG00000258793 | N/A                                                               |

|               |      |      |                 |                                                        |
|---------------|------|------|-----------------|--------------------------------------------------------|
| CPNE1         | 0.89 | 8.64 | ENSG00000214078 | copine 1                                               |
| GRN           | 0.89 | 9.46 | ENSG00000030582 | granulin precursor                                     |
| PCYOX1L       | 0.89 | 2.49 | ENSG00000145882 | prenylcysteine oxidase 1 like                          |
| ASAP3         | 0.89 | 4.85 | ENSG00000282854 | ArfGAP with SH3 domain, ankyrin repeat and PH domain 3 |
| PTGR2         | 0.88 | 2.34 | ENSG00000140043 | prostaglandin reductase 2                              |
| RP11-274B21.3 | 0.88 | 2.66 | ENSG00000243679 | N/A                                                    |
| AC010524.2    | 0.88 | 1.69 | ENSG00000268686 | N/A                                                    |
| FZD7          | 0.88 | 3.27 | ENSG00000155760 | frizzled class receptor 7                              |
| ZFAS1         | 0.88 | 6.67 | ENSG00000177410 | ZNFX1 antisense RNA 1                                  |
| NDUFA9        | 0.88 | 4.91 | ENSG00000139180 | NADH:ubiquinone oxidoreductase subunit A9              |
| SLC15A1       | 0.88 | 5.65 | ENSG00000088386 | solute carrier family 15 member 1                      |
| HLA-C         | 0.88 | 8.37 | ENSG00000204525 | major histocompatibility complex, class I, C           |
| IFT80         | 0.88 | 1.56 | ENSG00000068885 | intraflagellar transport 80                            |
| MOB3A         | 0.88 | 6.38 | ENSG00000172081 | MOB kinase activator 3A                                |
| FLNA          | 0.88 | 9.88 | ENSG00000196924 | filamin A                                              |
| AAMDC         | 0.88 | 3.47 | ENSG00000087884 | adipogenesis associated Mth938 domain containing       |
| FABP1         | 0.88 | 6.28 | ENSG00000163586 | fatty acid binding protein 1                           |
| ENTPD3-AS1    | 0.88 | 1.98 | ENSG00000223797 | ENTPD3 antisense RNA 1                                 |
| CCNB1IP1      | 0.88 | 5.94 | ENSG00000100814 | cyclin B1 interacting protein 1                        |
| SRP14-AS1     | 0.88 | 3.56 | ENSG00000248508 | SRP14 antisense RNA1 (head to head)                    |
| TMEM161B-AS1  | 0.88 | 2.57 | ENSG00000247828 | TMEM161B antisense RNA 1                               |
| COL7A1        | 0.88 | 4.61 | ENSG00000114270 | collagen type VII alpha 1 chain                        |
| BMP2          | 0.88 | 2.23 | ENSG00000125845 | bone morphogenetic protein 2                           |
| PODXL         | 0.88 | 3.45 | ENSG00000128567 | podocalyxin like                                       |
| RCN1          | 0.88 | 5.59 | ENSG00000049449 | reticulocalbin 1                                       |
| CCDC17        | 0.87 | 1.26 | ENSG00000159588 | coiled-coil domain containing 17                       |
| DMKN          | 0.87 | 5.00 | ENSG00000161249 | dermokine                                              |
| NEK3          | 0.87 | 3.48 | ENSG00000136098 | NIMA related kinase 3                                  |
| LAMP3         | 0.87 | 2.36 | ENSG00000078081 | lysosomal associated membrane protein 3                |

|               |      |      |                 |                                                                                      |
|---------------|------|------|-----------------|--------------------------------------------------------------------------------------|
| ATP5E         | 0.87 | 8.26 | ENSG00000124172 | ATP synthase, H <sup>+</sup> transporting, mitochondrial F1 complex, epsilon subunit |
| FAT4          | 0.87 | 1.09 | ENSG00000196159 | FAT atypical cadherin 4                                                              |
| ADPRM         | 0.87 | 2.48 | ENSG00000170222 | ADP-ribose/CDP-alcohol diphosphatase, manganese dependent                            |
| PRAF2         | 0.87 | 6.47 | ENSG00000243279 | PRA1 domain family member 2                                                          |
| ATP5O         | 0.87 | 7.02 | ENSG00000241837 | ATP synthase, H <sup>+</sup> transporting, mitochondrial F1 complex, O subunit       |
| MYO1A         | 0.87 | 2.81 | ENSG00000166866 | myosin IA                                                                            |
| CNTN1         | 0.87 | 8.06 | ENSG0000018236  | contactin 1                                                                          |
| DHRS4L2       | 0.87 | 2.10 | ENSG00000187630 | dehydrogenase/reductase 4 like 2                                                     |
| ITGAV         | 0.87 | 5.56 | ENSG00000138448 | integrin subunit alpha V                                                             |
| SKAP1         | 0.87 | 2.33 | ENSG00000141293 | src kinase associated phosphoprotein 1                                               |
| RILP          | 0.87 | 3.47 | ENSG00000274145 | Rab interacting lysosomal protein                                                    |
| GSTO1         | 0.87 | 7.25 | ENSG00000148834 | glutathione S-transferase omega 1                                                    |
| MT1X          | 0.87 | 1.72 | ENSG00000187193 | metallothionein 1X                                                                   |
| SHC2          | 0.87 | 5.38 | ENSG00000129946 | SHC adaptor protein 2                                                                |
| ZFHX2         | 0.87 | 2.93 | ENSG00000136367 | zinc finger homeobox 2                                                               |
| TUSC3         | 0.86 | 5.81 | ENSG00000104723 | tumor suppressor candidate 3                                                         |
| RP11-395G23.3 | 0.86 | 1.60 | ENSG00000254615 | N/A                                                                                  |
| SEMA4B        | 0.86 | 7.19 | ENSG00000185033 | semaphorin 4B                                                                        |
| B3GAT3        | 0.86 | 7.50 | ENSG00000149541 | beta-1,3-glucuronyltransferase 3                                                     |
| MRPL23        | 0.86 | 6.74 | ENSG00000214026 | mitochondrial ribosomal protein L23                                                  |
| RP11-421F16.3 | 0.86 | 3.20 | ENSG00000247903 | N/A                                                                                  |
| RPL3P4        | 0.86 | 2.22 | ENSG00000232573 | ribosomal protein L3 pseudogene 4                                                    |
| FGL1          | 0.86 | 4.90 | ENSG00000104760 | fibrinogen like 1                                                                    |
| RHOBTB1       | 0.86 | 4.92 | ENSG00000072422 | Rho related BTB domain containing 1                                                  |
| AFAP1L1       | 0.86 | 2.35 | ENSG00000157510 | actin filament associated protein 1 like 1                                           |
| HMGCL         | 0.86 | 5.93 | ENSG00000117305 | 3-hydroxymethyl-3-methylglutaryl-CoA lyase                                           |
| OR7E14P       | 0.86 | 3.11 | ENSG00000184669 | olfactory receptor family 7 subfamily E member 14 pseudogene                         |
| KIRREL        | 0.86 | 1.02 | ENSG00000183853 | kin of IRRE like (Drosophila)                                                        |

|           |      |       |                 |                                                                                           |
|-----------|------|-------|-----------------|-------------------------------------------------------------------------------------------|
| PALD1     | 0.86 | 1.02  | ENSG00000107719 | phosphatase domain containing,<br>paladin 1                                               |
| HOXC8     | 0.86 | 2.84  | ENSG00000037965 | homeobox C8                                                                               |
| DSE       | 0.86 | 3.62  | ENSG00000111817 | dermatan sulfate epimerase                                                                |
| MTND4P12  | 0.86 | 11.37 | ENSG00000247627 | mitochondrially encoded<br>NADH:ubiquinone oxidoreductase<br>core subunit 4 pseudogene 12 |
| HIST2H2BE | 0.85 | 1.30  | ENSG00000184678 | histone cluster 2 H2B family<br>member e                                                  |
| EPS8L1    | 0.85 | 4.96  | ENSG00000131037 | EPS8 like 1                                                                               |
| FOXO6     | 0.85 | 1.55  | ENSG00000281518 | forkhead box O6                                                                           |
| A4GALT    | 0.85 | 4.35  | ENSG00000128274 | alpha 1,4-galactosyltransferase                                                           |
| RNF103    | 0.85 | 4.86  | ENSG00000239305 | ring finger protein 103                                                                   |
| C16orf86  | 0.85 | 2.09  | ENSG00000159761 | chromosome 16 open reading frame<br>86                                                    |
| AKR1C1    | 0.85 | 6.61  | ENSG00000187134 | aldo-keto reductase family 1 member<br>C1                                                 |
| CTSB      | 0.85 | 8.45  | ENSG00000164733 | cathepsin B                                                                               |
| GPR137B   | 0.85 | 3.96  | ENSG00000077585 | G protein-coupled receptor 137B                                                           |
| AQP7      | 0.85 | 1.40  | ENSG00000165269 | aquaporin 7                                                                               |
| C5orf63   | 0.85 | 1.40  | ENSG00000164241 | chromosome 5 open reading frame<br>63                                                     |
| GPNMB     | 0.85 | 1.40  | ENSG00000136235 | glycoprotein nmb                                                                          |
| ZSCAN30   | 0.85 | 1.63  | ENSG00000186814 | zinc finger and SCAN domain<br>containing 30                                              |
| GOLGA8B   | 0.85 | 4.13  | ENSG00000215252 | golgin A8 family member B                                                                 |
| CTBS      | 0.84 | 3.97  | ENSG00000117151 | chitinase                                                                                 |
| ST3GAL5   | 0.84 | 4.65  | ENSG00000115525 | ST3 beta-galactoside alpha-2,3-<br>sialyltransferase 5                                    |
| ENO3      | 0.84 | 5.21  | ENSG00000108515 | enolase 3                                                                                 |
| NCALD     | 0.84 | 2.34  | ENSG00000104490 | neurocalcin delta                                                                         |
| SCARB2    | 0.84 | 7.71  | ENSG00000138760 | scavenger receptor class B member 2                                                       |
| SGCB      | 0.84 | 2.20  | ENSG00000163069 | sarcoglycan beta                                                                          |
| C11orf68  | 0.84 | 6.30  | ENSG00000175573 | chromosome 11 open reading frame<br>68                                                    |
| RNF208    | 0.84 | 4.09  | ENSG00000212864 | ring finger protein 208                                                                   |
| ITGA7     | 0.84 | 4.76  | ENSG00000135424 | integrin subunit alpha 7                                                                  |

|               |      |      |                 |                                                                |
|---------------|------|------|-----------------|----------------------------------------------------------------|
| MPZL3         | 0.84 | 5.13 | ENSG00000160588 | myelin protein zero like 3                                     |
| SYNGR3        | 0.84 | 4.40 | ENSG00000127561 | synaptogyrin 3                                                 |
| CRIPT         | 0.84 | 4.32 | ENSG00000119878 | CXXC repeat containing interactor of PDZ3 domain               |
| RTN2          | 0.84 | 5.98 | ENSG00000125744 | reticulon 2                                                    |
| AK7           | 0.84 | 2.75 | ENSG00000140057 | adenylate kinase 7                                             |
| CDKN2D        | 0.84 | 2.75 | ENSG00000129355 | cyclin dependent kinase inhibitor 2D                           |
| XCL1          | 0.83 | 1.58 | ENSG00000143184 | X-C motif chemokine ligand 1                                   |
| ITGA6         | 0.83 | 3.80 | ENSG00000091409 | integrin subunit alpha 6                                       |
| PIM1          | 0.83 | 3.75 | ENSG00000137193 | Pim-1 proto-oncogene, serine/threonine kinase                  |
| FUT6          | 0.83 | 1.34 | ENSG00000156413 | fucosyltransferase 6                                           |
| TMEM56        | 0.83 | 5.79 | ENSG00000152078 | transmembrane protein 56                                       |
| NEAT1         | 0.83 | 7.68 | ENSG00000245532 | nuclear paraspeckle assembly transcript 1 (non-protein coding) |
| MALAT1        | 0.83 | 6.63 | ENSG00000278217 | Metastasis associated lung adenocarcinoma transcript 1         |
| C11orf74      | 0.83 | 4.58 | ENSG00000166352 | chromosome 11 open reading frame 74                            |
| RP11-539L10.3 | 0.83 | 1.85 | ENSG00000251580 | N/A                                                            |
| MICA          | 0.83 | 5.96 | ENSG00000231225 | MHC class I polypeptide-related sequence A                     |
| RP11-734K2.4  | 0.83 | 1.06 | ENSG00000270344 | N/A                                                            |
| STXBP2        | 0.83 | 6.73 | ENSG00000076944 | syntaxin binding protein 2                                     |
| NKD1          | 0.83 | 1.66 | ENSG00000140807 | naked cuticle homolog 1                                        |
| PRSS23        | 0.83 | 6.30 | ENSG00000150687 | protease, serine 23                                            |
| NR1D2         | 0.83 | 2.08 | ENSG00000174738 | nuclear receptor subfamily 1 group D member 2                  |
| CASC15        | 0.83 | 4.40 | ENSG00000272168 | cancer susceptibility candidate 15 (non-protein coding)        |
| CD24P4        | 0.83 | 6.40 | ENSG00000185275 | CD24 molecule pseudogene 4                                     |
| STYXL1        | 0.83 | 5.63 | ENSG00000127952 | serine/threonine/tyrosine interacting like 1                   |
| SELENBP1      | 0.83 | 5.15 | ENSG00000143416 | selenium binding protein 1                                     |
| NDN           | 0.83 | 3.76 | ENSG00000182636 | needin, MAGE family member                                     |
| RP11-33B1.1   | 0.83 | 2.61 | ENSG00000245958 | N/A                                                            |
| YPEL5         | 0.82 | 5.69 | ENSG00000119801 | yippee like 5                                                  |

|              |      |      |                 |                                                                                                   |
|--------------|------|------|-----------------|---------------------------------------------------------------------------------------------------|
| RP11-392P7.6 | 0.82 | 2.50 | ENSG00000247498 | N/A                                                                                               |
| NIPAL2       | 0.82 | 2.65 | ENSG00000104361 | NIPA like domain containing 2                                                                     |
| RAPGEF3      | 0.82 | 2.38 | ENSG00000079337 | Rap guanine nucleotide exchange factor 3                                                          |
| CPQ          | 0.82 | 4.78 | ENSG00000104324 | carboxypeptidase Q                                                                                |
| MEGF6        | 0.82 | 3.76 | ENSG00000162591 | multiple EGF like domains 6                                                                       |
| CCDC167      | 0.82 | 7.13 | ENSG00000198937 | coiled-coil domain containing 167                                                                 |
| SMARCD3      | 0.82 | 3.08 | ENSG00000082014 | SWI/SNF related, matrix associated, actin dependent regulator of chromatin, subfamily d, member 3 |
| TEKT4P2      | 0.82 | 1.28 | ENSG00000188681 | tektin 4 pseudogene 2                                                                             |
| SYTL5        | 0.82 | 3.18 | ENSG00000147041 | synaptotagmin like 5                                                                              |
| RARRES2P8    | 0.82 | 1.61 | ENSG00000259996 | retinoic acid receptor responder 2 pseudogene 8                                                   |
| ASTN2        | 0.82 | 2.10 | ENSG00000148219 | astrotactin 2                                                                                     |
| ANKRD24      | 0.82 | 2.76 | ENSG00000089847 | ankyrin repeat domain 24                                                                          |
| TMEM101      | 0.82 | 5.68 | ENSG00000091947 | transmembrane protein 101                                                                         |
| FAM47E-STBD1 | 0.82 | 2.51 | ENSG00000272414 | FAM47E-STBD1 readthrough                                                                          |
| ARHGEF4      | 0.82 | 2.35 | ENSG00000136002 | Rho guanine nucleotide exchange factor 4                                                          |
| ANKHD1       | 0.81 | 1.69 | ENSG00000131503 | ankyrin repeat and KH domain containing 1                                                         |
| ASIC1        | 0.81 | 4.76 | ENSG00000110881 | acid sensing ion channel subunit 1                                                                |
| CCDC113      | 0.81 | 3.09 | ENSG00000103021 | coiled-coil domain containing 113                                                                 |
| FHL1         | 0.81 | 3.09 | ENSG00000022267 | four and a half LIM domains 1                                                                     |
| RAB40B       | 0.81 | 2.21 | ENSG00000141542 | RAB40B, member RAS oncogene family                                                                |
| TUBA4A       | 0.81 | 8.32 | ENSG00000127824 | tubulin alpha 4a                                                                                  |
| PDLIM7       | 0.81 | 7.48 | ENSG00000196923 | PDZ and LIM domain 7                                                                              |
| H2AFY2       | 0.81 | 3.45 | ENSG00000099284 | H2A histone family member Y2                                                                      |
| THNSL1       | 0.81 | 2.68 | ENSG00000185875 | threonine synthase like 1                                                                         |
| CALCOCO1     | 0.81 | 5.80 | ENSG00000012822 | calcium binding and coiled-coil domain 1                                                          |
| RP11-390F4.6 | 0.81 | 1.84 | ENSG00000236924 | N/A                                                                                               |
| PRRG4        | 0.81 | 1.11 | ENSG00000135378 | proline rich and Gla domain 4                                                                     |
| LTBP3        | 0.81 | 6.16 | ENSG00000168056 | latent transforming growth factor beta binding protein 3                                          |



|                |      |       |                 |                                                                      |
|----------------|------|-------|-----------------|----------------------------------------------------------------------|
| RP11-23P13.6   | 0.81 | 2.13  | ENSG00000174171 | N/A                                                                  |
| JRKL           | 0.81 | 1.56  | ENSG00000183340 | JRK-like                                                             |
| LINC01011      | 0.81 | 1.56  | ENSG00000244041 | long intergenic non-protein coding RNA 1011                          |
| PCP4L1         | 0.81 | 1.56  | ENSG00000248485 | Purkinje cell protein 4 like 1                                       |
| NDUFB7         | 0.81 | 8.14  | ENSG00000099795 | NADH:ubiquinone oxidoreductase subunit B7                            |
| APOA2          | 0.80 | 11.79 | ENSG00000158874 | apolipoprotein A2                                                    |
| MORN4          | 0.80 | 3.71  | ENSG00000171160 | MORN repeat containing 4                                             |
| B3GALNT1       | 0.80 | 1.22  | ENSG00000169255 | beta-1,3-N-acetylgalactosaminyltransferase 1 (globoside blood group) |
| PRKAR2A-AS1    | 0.80 | 1.64  | ENSG00000224424 | PRKAR2A antisense RNA 1                                              |
| FKBP7          | 0.80 | 4.41  | ENSG00000079150 | FK506 binding protein 7                                              |
| TRAPPC1        | 0.80 | 7.86  | ENSG00000170043 | trafficking protein particle complex 1                               |
| PROM1          | 0.80 | 2.24  | ENSG00000007062 | prominin 1                                                           |
| SPAG16         | 0.80 | 3.36  | ENSG00000144451 | sperm associated antigen 16                                          |
| KLHDC8B        | 0.80 | 4.68  | ENSG00000185909 | kelch domain containing 8B                                           |
| GALNT12        | 0.80 | 3.15  | ENSG00000119514 | polypeptide N-acetylgalactosaminyltransferase 12                     |
| SLC4A7         | 0.80 | 4.23  | ENSG00000033867 | solute carrier family 4 member 7                                     |
| FCGRT          | 0.80 | 8.16  | ENSG00000104870 | Fc fragment of IgG receptor and transporter                          |
| DLGAP3         | 0.80 | 3.74  | ENSG00000116544 | DLG associated protein 3                                             |
| CCDC69         | 0.80 | 3.20  | ENSG00000198624 | coiled-coil domain containing 69                                     |
| HAP1           | 0.80 | 3.07  | ENSG00000173805 | huntingtin associated protein 1                                      |
| KIAA1324L      | 0.80 | 3.76  | ENSG00000164659 | KIAA1324 like                                                        |
| RP11-216L13.19 | 0.80 | 2.34  | ENSG00000273066 | N/A                                                                  |
| USP49          | 0.80 | 2.34  | ENSG00000164663 | ubiquitin specific peptidase 49                                      |
| NRM            | 0.80 | 6.02  | ENSG00000228854 | nurim (nuclear envelope membrane protein)                            |
| ZNF766         | 0.80 | 3.48  | ENSG00000196214 | zinc finger protein 766                                              |
| IL1RAP         | 0.80 | 2.59  | ENSG00000196083 | interleukin 1 receptor accessory protein                             |
| LINC00993      | 0.80 | 1.79  | ENSG00000235687 | long intergenic non-protein coding RNA 993                           |
| TNFAIP8        | 0.80 | 1.79  | ENSG00000145779 | TNF alpha induced protein 8                                          |

|               |      |      |                 |                                                                    |
|---------------|------|------|-----------------|--------------------------------------------------------------------|
| AGAP2-AS1     | 0.80 | 2.80 | ENSG00000255737 | AGAP2 antisense RNA 1                                              |
| LTBP1         | 0.80 | 3.98 | ENSG00000049323 | latent transforming growth factor<br>beta binding protein 1        |
| GALC          | 0.80 | 3.42 | ENSG00000054983 | galactosylceramidase                                               |
| AAK1          | 0.80 | 2.15 | ENSG00000115977 | AP2 associated kinase 1                                            |
| AF277315.13   | 0.80 | 1.42 | ENSG00000226141 | N/A                                                                |
| SMPD3         | 0.80 | 1.42 | ENSG00000103056 | sphingomyelin phosphodiesterase 3                                  |
| UQCC2         | 0.80 | 7.06 | ENSG00000137288 | ubiquinol-cytochrome c reductase<br>complex assembly factor 2      |
| RP11-425L10.1 | 0.80 | 2.43 | ENSG00000244313 | N/A                                                                |
| CD151         | 0.80 | 9.12 | ENSG00000177697 | CD151 molecule (Raph blood group)                                  |
| JAK1          | 0.80 | 7.75 | ENSG00000162434 | Janus kinase 1                                                     |
| TRIM16L       | 0.79 | 1.86 | ENSG00000108448 | tripartite motif containing 16-like                                |
| RGS3          | 0.79 | 2.87 | ENSG00000138835 | regulator of G-protein signaling 3                                 |
| MGMT          | 0.79 | 5.02 | ENSG00000170430 | O-6-methylguanine-DNA<br>methyltransferase                         |
| TMEM160       | 0.79 | 6.57 | ENSG00000130748 | transmembrane protein 160                                          |
| CGNL1         | 0.79 | 3.29 | ENSG00000128849 | cingulin like 1                                                    |
| OGFOD3        | 0.79 | 5.55 | ENSG00000181396 | 2-oxoglutarate and iron dependent<br>oxygenase domain containing 3 |
| DSCR4         | 0.79 | 4.14 | ENSG00000184029 | Down syndrome critical region 4                                    |
| CREBRF        | 0.79 | 2.06 | ENSG00000164463 | CREB3 regulatory factor                                            |
| CALN1         | 0.79 | 1.04 | ENSG00000183166 | calneuron 1                                                        |
| ITM2A         | 0.79 | 1.04 | ENSG00000078596 | integral membrane protein 2A                                       |
| MVP           | 0.79 | 7.14 | ENSG00000013364 | major vault protein                                                |
| ARMC12        | 0.79 | 2.40 | ENSG00000157343 | armadillo repeat containing 12                                     |
| TMEM38A       | 0.79 | 4.63 | ENSG00000072954 | transmembrane protein 38A                                          |
| SLC27A2       | 0.79 | 3.27 | ENSG00000140284 | solute carrier family 27 member 2                                  |
| CIRBP         | 0.79 | 5.97 | ENSG00000099622 | cold inducible RNA binding protein                                 |
| ADAM15        | 0.79 | 7.23 | ENSG00000143537 | ADAM metalloproteinase domain 15                                   |
| ADHFE1        | 0.79 | 3.48 | ENSG00000147576 | alcohol dehydrogenase, iron<br>containing 1                        |
| COL27A1       | 0.79 | 4.26 | ENSG00000196739 | collagen type XXVII alpha 1 chain                                  |
| GPR161        | 0.79 | 3.99 | ENSG00000143147 | G protein-coupled receptor 161                                     |
| ECHDC3        | 0.79 | 1.16 | ENSG00000134463 | enoyl-CoA hydratase domain<br>containing 3                         |
| SMIM19        | 0.78 | 3.57 | ENSG00000176209 | small integral membrane protein 19                                 |

|               |      |      |                 |                                                          |
|---------------|------|------|-----------------|----------------------------------------------------------|
| SPDYC         | 0.78 | 3.08 | ENSG00000204710 | speedy/RINGO cell cycle regulator family member C        |
| SP110         | 0.78 | 3.44 | ENSG00000135899 | SP110 nuclear body protein                               |
| NUAK2         | 0.78 | 5.47 | ENSG00000163545 | NUAK family kinase 2                                     |
| CSPG5         | 0.78 | 3.89 | ENSG00000114646 | chondroitin sulfate proteoglycan 5                       |
| PLA2G4C       | 0.78 | 3.10 | ENSG00000105499 | phospholipase A2 group IVC                               |
| SPAG6         | 0.78 | 3.79 | ENSG00000077327 | sperm associated antigen 6                               |
| PAIP2B        | 0.78 | 3.16 | ENSG00000124374 | poly(A) binding protein interacting protein 2B           |
| RASSF4        | 0.78 | 4.90 | ENSG00000107551 | Ras association domain family member 4                   |
| TTC21A        | 0.78 | 1.96 | ENSG00000168026 | tetratricopeptide repeat domain 21A                      |
| RGAG4         | 0.78 | 3.99 | ENSG00000242732 | retrotransposon gag domain containing 4                  |
| RP11-968A15.2 | 0.78 | 1.36 | ENSG00000257596 | N/A                                                      |
| ZNF350        | 0.78 | 1.36 | ENSG00000256683 | zinc finger protein 350                                  |
| FAM50A        | 0.78 | 8.71 | ENSG00000071859 | family with sequence similarity 50 member A              |
| NDUFA3        | 0.78 | 8.27 | ENSG00000276061 | NADH:ubiquinone oxidoreductase subunit A3                |
| ZSWIM5        | 0.78 | 3.32 | ENSG00000162415 | zinc finger SWIM-type containing 5                       |
| TRANK1        | 0.78 | 2.08 | ENSG00000168016 | tetratricopeptide repeat and ankyrin repeat containing 1 |
| FAM127A       | 0.78 | 8.17 | ENSG00000134590 | family with sequence similarity 127 member A             |
| TJP3          | 0.78 | 4.45 | ENSG00000105289 | tight junction protein 3                                 |
| ITIH2         | 0.78 | 9.06 | ENSG00000151655 | inter-alpha-trypsin inhibitor heavy chain 2              |
| F13B          | 0.78 | 1.54 | ENSG00000143278 | coagulation factor XIII B chain                          |
| SSPO          | 0.78 | 1.54 | ENSG00000197558 | SCO-spondin                                              |
| CRHR1-IT1     | 0.78 | 4.08 | ENSG00000282171 | CRHR1 intronic transcript 1                              |
| DLG4          | 0.78 | 5.10 | ENSG00000132535 | discs large MAGUK scaffold protein 4                     |
| RIMS3         | 0.78 | 3.98 | ENSG00000117016 | regulating synaptic membrane exocytosis 3                |
| CDON          | 0.78 | 2.98 | ENSG00000064309 | cell adhesion associated, oncogene regulated             |
| SLC25A35      | 0.77 | 5.08 | ENSG00000125434 | solute carrier family 25 member 35                       |

|               |      |       |                 |                                                                                           |
|---------------|------|-------|-----------------|-------------------------------------------------------------------------------------------|
| AC062029.1    | 0.77 | 1.70  | ENSG00000234028 | N/A                                                                                       |
| SIL1          | 0.77 | 6.58  | ENSG00000120725 | SIL1 nucleotide exchange factor                                                           |
| KRT20         | 0.77 | 2.35  | ENSG00000171431 | keratin 20                                                                                |
| MYRF          | 0.77 | 6.00  | ENSG00000124920 | myelin regulatory factor                                                                  |
| RASGEF1A      | 0.77 | 3.88  | ENSG00000198915 | RasGEF domain family member 1A                                                            |
| SERPINB6      | 0.77 | 8.08  | ENSG00000124570 | serpin family B member 6                                                                  |
| ZSWIM6        | 0.77 | 1.92  | ENSG00000130449 | zinc finger SWIM-type containing 6                                                        |
| MTND1P23      | 0.77 | 10.30 | ENSG00000225972 | mitochondrially encoded<br>NADH:ubiquinone oxidoreductase<br>core subunit 1 pseudogene 23 |
| RP11-446N19.1 | 0.77 | 1.98  | ENSG00000272369 | N/A                                                                                       |
| ZNF846        | 0.77 | 1.98  | ENSG00000196605 | zinc finger protein 846                                                                   |
| RP11-660L16.2 | 0.77 | 3.36  | ENSG00000254682 | N/A                                                                                       |
| CAMTA1        | 0.77 | 5.83  | ENSG00000171735 | calmodulin binding transcription<br>activator 1                                           |
| KIAA1462      | 0.77 | 3.05  | ENSG00000165757 | KIAA1462                                                                                  |
| HES4          | 0.77 | 6.02  | ENSG00000188290 | hes family bHLH transcription factor<br>4                                                 |
| ADCK1         | 0.77 | 4.59  | ENSG00000063761 | aarF domain containing kinase 1                                                           |
| CAPS          | 0.77 | 3.19  | ENSG00000105519 | calcyphosine                                                                              |
| DNM1P35       | 0.77 | 1.09  | ENSG00000246877 | dynammin 1 pseudogene 35                                                                  |
| RP1-140A9.1   | 0.77 | 1.09  | ENSG00000231050 | N/A                                                                                       |
| RP11-888D10.4 | 0.77 | 1.09  | ENSG00000273284 | N/A                                                                                       |
| C4orf19       | 0.77 | 1.20  | ENSG00000154274 | chromosome 4 open reading frame<br>19                                                     |
| LGALS8-AS1    | 0.77 | 1.20  | ENSG00000223776 | LGALS8 antisense RNA 1                                                                    |
| FAM129A       | 0.76 | 1.30  | ENSG00000135842 | family with sequence similarity 129<br>member A                                           |
| DDR1          | 0.76 | 6.86  | ENSG00000230456 | discoidin domain receptor tyrosine<br>kinase 1                                            |
| SPTBN4        | 0.76 | 3.85  | ENSG00000160460 | spectrin beta, non-erythrocytic 4                                                         |
| HIST1H2BK     | 0.76 | 3.09  | ENSG00000197903 | histone cluster 1 H2B family<br>member k                                                  |
| PSMB10        | 0.76 | 1.40  | ENSG00000205220 | proteasome subunit beta 10                                                                |
| THEMIS2       | 0.76 | 1.40  | ENSG00000130775 | thymocyte selection associated<br>family member 2                                         |
| MIR940        | 0.76 | 1.49  | ENSG00000260778 | microRNA 940                                                                              |

|             |      |      |                 |                                                   |
|-------------|------|------|-----------------|---------------------------------------------------|
| LMBR1L      | 0.76 | 5.76 | ENSG00000139636 | limb development membrane protein 1 like          |
| MT2A        | 0.76 | 3.75 | ENSG00000125148 | metallothionein 2A                                |
| ATP8B3      | 0.76 | 2.71 | ENSG00000130270 | ATPase phospholipid transporting 8B3              |
| WDR83OS     | 0.76 | 6.64 | ENSG00000105583 | WD repeat domain 83 opposite strand               |
| SYBU        | 0.76 | 1.66 | ENSG00000147642 | syntabulin                                        |
| PLBD1       | 0.76 | 6.24 | ENSG00000121316 | phospholipase B domain containing 1               |
| REEP5       | 0.76 | 7.48 | ENSG00000129625 | receptor accessory protein 5                      |
| WNT10B      | 0.76 | 3.56 | ENSG00000169884 | Wnt family member 10B                             |
| TESC        | 0.76 | 8.21 | ENSG00000088992 | tescalcin                                         |
| INCA1       | 0.76 | 1.94 | ENSG00000196388 | inhibitor of CDK, cyclin A1 interacting protein 1 |
| WAS         | 0.76 | 1.94 | ENSG00000015285 | Wiskott-Aldrich syndrome                          |
| WWTR1       | 0.76 | 3.74 | ENSG00000018408 | WW domain containing transcription regulator 1    |
| FAM213B     | 0.76 | 5.05 | ENSG00000275125 | family with sequence similarity 213 member B      |
| MAPK11      | 0.76 | 5.06 | ENSG00000185386 | mitogen-activated protein kinase 11               |
| ISCA2       | 0.76 | 4.85 | ENSG00000165898 | iron-sulfur cluster assembly 2                    |
| MIR24-2     | 0.76 | 4.28 | ENSG00000267519 | microRNA 24-2                                     |
| FNDC3B      | 0.76 | 7.60 | ENSG00000075420 | fibronectin type III domain containing 3B         |
| SHISA4      | 0.76 | 4.68 | ENSG00000198892 | shisa family member 4                             |
| RABL2A      | 0.76 | 2.23 | ENSG00000144134 | RAB, member of RAS oncogene family-like 2A        |
| EXD3        | 0.76 | 3.39 | ENSG00000187609 | exonuclease 3'-5' domain containing 3             |
| FBXL2       | 0.76 | 2.29 | ENSG00000153558 | F-box and leucine rich repeat protein 2           |
| SMOC1       | 0.76 | 2.34 | ENSG00000198732 | SPARC related modular calcium binding 1           |
| RP5-882C2.2 | 0.76 | 2.38 | ENSG00000260793 | N/A                                               |
| OCEL1       | 0.76 | 5.98 | ENSG00000099330 | occludin/ELL domain containing 1                  |
| SP140L      | 0.76 | 4.69 | ENSG00000185404 | SP140 nuclear body protein like                   |

|             |      |      |                 |                                                                              |
|-------------|------|------|-----------------|------------------------------------------------------------------------------|
| PNPLA8      | 0.76 | 3.67 | ENSG00000135241 | patatin like phospholipase domain containing 8                               |
| DSCR10      | 0.76 | 2.68 | ENSG00000233316 | Down syndrome critical region 10 (non-protein coding)                        |
| CTSZ        | 0.75 | 5.26 | ENSG00000101160 | cathepsin Z                                                                  |
| NT5M        | 0.75 | 2.80 | ENSG00000205309 | 5',3'-nucleotidase, mitochondrial                                            |
| PCMTD1      | 0.75 | 2.90 | ENSG00000168300 | protein-L-isoaspartate (D-aspartate) O-methyltransferase domain containing 1 |
| AHNAK2      | 0.75 | 4.18 | ENSG00000185567 | AHNAK nucleoprotein 2                                                        |
| CD59        | 0.75 | 6.57 | ENSG00000085063 | CD59 molecule                                                                |
| ADM         | 0.75 | 4.44 | ENSG00000148926 | adrenomedullin                                                               |
| SUPT3H      | 0.75 | 3.45 | ENSG00000196284 | SPT3 homolog, SAGA and STAGA complex component                               |
| CEBPA-AS1   | 0.75 | 3.58 | ENSG00000267296 | CEBPA antisense RNA 1 (head to head)                                         |
| RPS27L      | 0.75 | 6.42 | ENSG00000185088 | ribosomal protein S27 like                                                   |
| AKR1C2      | 0.75 | 7.70 | ENSG00000151632 | aldo-keto reductase family 1 member C2                                       |
| FAM114A1    | 0.75 | 5.61 | ENSG00000197712 | family with sequence similarity 114 member A1                                |
| ISG20       | 0.75 | 5.67 | ENSG00000172183 | interferon stimulated exonuclease gene 20                                    |
| MARCH2      | 0.75 | 5.25 | ENSG00000099785 | membrane associated ring-CH-type finger 2                                    |
| TYRO3       | 0.75 | 4.85 | ENSG00000092445 | TYRO3 protein tyrosine kinase                                                |
| RMI2        | 0.75 | 4.56 | ENSG00000175643 | RecQ mediated genome instability 2                                           |
| GPSM1       | 0.75 | 4.12 | ENSG00000160360 | G-protein signaling modulator 1                                              |
| COX7B2      | 0.75 | 3.71 | ENSG00000170516 | cytochrome c oxidase subunit 7B2                                             |
| GDPD5       | 0.75 | 3.57 | ENSG00000158555 | glycerophosphodiester phosphodiesterase domain containing 5                  |
| ITGA2       | 0.75 | 2.03 | ENSG00000164171 | integrin subunit alpha 2                                                     |
| RHPN1-AS1   | 0.75 | 1.97 | ENSG00000254389 | RHPN1 antisense RNA 1 (head to head)                                         |
| RP1-150O5.3 | 0.75 | 1.90 | ENSG00000282990 | N/A                                                                          |
| COPG2       | 0.75 | 1.76 | ENSG00000158623 | coatomer protein complex subunit gamma 2                                     |

|                |      |      |                 |                                                                      |
|----------------|------|------|-----------------|----------------------------------------------------------------------|
| CTD-2227E11.1  | 0.75 | 1.76 | ENSG00000270933 | N/A                                                                  |
| CIQL4          | 0.75 | 5.46 | ENSG00000186897 | complement C1q like 4                                                |
| NPW            | 0.75 | 1.69 | ENSG00000183971 | neuropeptide W                                                       |
| ZNF837         | 0.75 | 1.69 | ENSG00000152475 | zinc finger protein 837                                              |
| BBS12          | 0.75 | 1.53 | ENSG00000181004 | Bardet-Biedl syndrome 12                                             |
| RP11-658F2.8   | 0.75 | 1.44 | ENSG00000258297 | N/A                                                                  |
| ZGLP1          | 0.75 | 1.44 | ENSG00000220201 | zinc finger, GATA-like protein 1                                     |
| DLG3           | 0.75 | 1.34 | ENSG00000082458 | discs large MAGUK scaffold protein 3                                 |
| TMEM191A       | 0.75 | 1.34 | ENSG00000226287 | transmembrane protein 191A (pseudogene)                              |
| IDH1-AS1       | 0.75 | 1.13 | ENSG00000231908 | IDH1 antisense RNA 1                                                 |
| GINM1          | 0.75 | 5.71 | ENSG00000055211 | glycoprotein integral membrane 1                                     |
| ALB            | 0.74 | 6.06 | ENSG00000163631 | albumin                                                              |
| GTF3C6         | 0.74 | 6.70 | ENSG00000155115 | general transcription factor IIIC subunit 6                          |
| ARSA           | 0.74 | 6.12 | ENSG00000100299 | arylsulfatase A                                                      |
| KCNC4          | 0.74 | 3.96 | ENSG00000116396 | potassium voltage-gated channel subfamily C member 4                 |
| NIPSNAP3A      | 0.74 | 3.05 | ENSG00000136783 | nipsnap homolog 3A                                                   |
| G6PC3          | 0.74 | 7.76 | ENSG00000141349 | glucose-6-phosphatase catalytic subunit 3                            |
| TAGLN          | 0.74 | 2.93 | ENSG00000149591 | transgelin                                                           |
| RELN           | 0.74 | 8.84 | ENSG00000189056 | reelin                                                               |
| CSRP1          | 0.74 | 5.50 | ENSG00000159176 | cysteine and glycine rich protein 1                                  |
| AIF1L          | 0.74 | 2.55 | ENSG00000126878 | allograft inflammatory factor 1 like                                 |
| DYNLRB1        | 0.74 | 9.00 | ENSG00000125971 | dynein light chain roadblock-type 1                                  |
| SPATA20        | 0.74 | 5.23 | ENSG00000006282 | spermatogenesis associated 20                                        |
| AP2S1          | 0.74 | 8.83 | ENSG00000042753 | adaptor related protein complex 2 sigma 1 subunit                    |
| PPM1M          | 0.74 | 4.21 | ENSG00000164088 | protein phosphatase, Mg <sup>2+</sup> /Mn <sup>2+</sup> dependent 1M |
| ERRFI1         | 0.74 | 5.48 | ENSG00000116285 | ERBB receptor feedback inhibitor 1                                   |
| NPHP1          | 0.74 | 2.22 | ENSG00000144061 | nephrocystin 1                                                       |
| RP11-793H13.11 | 0.74 | 2.11 | ENSG00000270175 | N/A                                                                  |
| HLA-DMB        | 0.74 | 2.91 | ENSG00000241674 | major histocompatibility complex, class II, DM beta                  |

|              |      |       |                 |                                                          |
|--------------|------|-------|-----------------|----------------------------------------------------------|
| RPS23P8      | 0.74 | 1.99  | ENSG00000230629 | ribosomal protein S23 pseudogene 8                       |
| AC007773.2   | 0.74 | 2.80  | ENSG00000267213 | N/A                                                      |
| DNAJC15      | 0.74 | 3.95  | ENSG00000120675 | DnaJ heat shock protein family (Hsp40) member C15        |
| ZNF83        | 0.74 | 2.69  | ENSG00000167766 | zinc finger protein 83                                   |
| ZNF774       | 0.74 | 1.79  | ENSG00000196391 | zinc finger protein 774                                  |
| RDM1         | 0.73 | 2.61  | ENSG00000278023 | RAD52 motif containing 1                                 |
| EIF4BP7      | 0.73 | 1.72  | ENSG00000225031 | eukaryotic translation initiation factor 4B pseudogene 7 |
| PIK3AP1      | 0.73 | 3.51  | ENSG00000155629 | phosphoinositide-3-kinase adaptor protein 1              |
| FGG          | 0.73 | 11.50 | ENSG00000171557 | fibrinogen gamma chain                                   |
| CD47         | 0.73 | 4.50  | ENSG00000196776 | CD47 molecule                                            |
| RP1-197B17.3 | 0.73 | 1.56  | ENSG00000257433 | N/A                                                      |
| KDSR         | 0.73 | 5.11  | ENSG00000119537 | 3-ketodihydrosphingosine reductase                       |
| TST          | 0.73 | 7.00  | ENSG00000128311 | thiosulfate sulfurtransferase                            |
| FNDC4        | 0.73 | 4.96  | ENSG00000115226 | fibronectin type III domain containing 4                 |
| TMEM205      | 0.73 | 7.93  | ENSG00000105518 | transmembrane protein 205                                |
| HSD17B14     | 0.73 | 6.90  | ENSG00000087076 | hydroxysteroid 17-beta dehydrogenase 14                  |
| CPE          | 0.73 | 4.39  | ENSG00000109472 | carboxypeptidase E                                       |
| PRDX5        | 0.73 | 9.66  | ENSG00000126432 | peroxiredoxin 5                                          |
| HOGA1        | 0.73 | 2.82  | ENSG00000241935 | 4-hydroxy-2-oxoglutarate aldolase 1                      |
| RP4-625H18.2 | 0.73 | 1.38  | ENSG00000228412 | N/A                                                      |
| TSPAN9       | 0.73 | 5.69  | ENSG00000011105 | tetraspanin 9                                            |
| YIPF2        | 0.73 | 6.42  | ENSG00000130733 | Yip1 domain family member 2                              |
| PALM         | 0.73 | 6.55  | ENSG00000099864 | paralemmin                                               |
| RP11-138A9.2 | 0.73 | 1.28  | ENSG00000273319 | N/A                                                      |
| TMEM121      | 0.73 | 1.28  | ENSG00000184986 | transmembrane protein 121                                |
| PSME1        | 0.73 | 7.02  | ENSG00000092010 | proteasome activator subunit 1                           |
| PPP2R3A      | 0.73 | 2.63  | ENSG00000073711 | protein phosphatase 2 regulatory subunit B"alpha         |
| EREG         | 0.73 | 5.76  | ENSG00000124882 | epiregulin                                               |
| NTAN1        | 0.73 | 5.61  | ENSG00000275779 | N-terminal asparagine amidase                            |
| SLC8A2       | 0.73 | 2.02  | ENSG00000118160 | solute carrier family 8 member A2                        |
| FBXO10       | 0.73 | 4.96  | ENSG00000147912 | F-box protein 10                                         |



|            |      |      |                 |                                                           |
|------------|------|------|-----------------|-----------------------------------------------------------|
| PHEX       | 0.73 | 2.50 | ENSG00000102174 | phosphate regulating endopeptidase homolog, X-linked      |
| SPC24      | 0.73 | 5.04 | ENSG00000161888 | SPC24, NDC80 kinetochore complex component                |
| DYNLT1     | 0.73 | 7.20 | ENSG00000146425 | dynein light chain Tctex-type 1                           |
| RPL38      | 0.72 | 9.39 | ENSG00000172809 | ribosomal protein L38                                     |
| ENKD1      | 0.72 | 4.55 | ENSG00000124074 | enkurin domain containing 1                               |
| ANKRD34A   | 0.72 | 3.89 | ENSG00000272031 | ankyrin repeat domain 34A                                 |
| OAS3       | 0.72 | 4.85 | ENSG00000111331 | 2'-5'-oligoadenylate synthetase 3                         |
| TIPARP     | 0.72 | 4.45 | ENSG00000163659 | TCDD inducible poly(ADP-ribose) polymerase                |
| SEMA3B     | 0.72 | 2.98 | ENSG00000012171 | semaphorin 3B                                             |
| TRADD      | 0.72 | 4.99 | ENSG00000102871 | TNFRSF1A associated via death domain                      |
| DUSP23     | 0.72 | 4.77 | ENSG00000158716 | dual specificity phosphatase 23                           |
| BAIAP2-AS1 | 0.72 | 4.17 | ENSG00000226137 | BAIAP2 antisense RNA 1 (head to head)                     |
| FAM46A     | 0.72 | 6.24 | ENSG00000112773 | family with sequence similarity 46 member A               |
| COCH       | 0.72 | 2.60 | ENSG00000100473 | cochlin                                                   |
| ABHD14A    | 0.72 | 5.05 | ENSG00000248487 | abhydrolase domain containing 14A                         |
| HOXB9      | 0.72 | 2.16 | ENSG00000170689 | homeobox B9                                               |
| ANXA6      | 0.72 | 5.17 | ENSG00000197043 | annexin A6                                                |
| GATA3-AS1  | 0.72 | 2.52 | ENSG00000197308 | GATA3 antisense RNA 1                                     |
| HPX        | 0.72 | 7.17 | ENSG00000110169 | hemopexin                                                 |
| DNAH17     | 0.72 | 1.59 | ENSG00000187775 | dynein axonemal heavy chain 17                            |
| SOX4       | 0.72 | 5.10 | ENSG00000124766 | SRY-box 4                                                 |
| ERAP2      | 0.72 | 3.99 | ENSG00000164308 | endoplasmic reticulum aminopeptidase 2                    |
| ASB4       | 0.72 | 3.39 | ENSG00000005981 | ankyrin repeat and SOCS box containing 4                  |
| SERPINB1   | 0.72 | 6.68 | ENSG00000021355 | serpin family B member 1                                  |
| TRIM29     | 0.72 | 1.51 | ENSG00000137699 | tripartite motif containing 29                            |
| MEF2B      | 0.72 | 2.38 | ENSG00000213999 | myocyte enhancer factor 2B                                |
| VOPPI      | 0.72 | 4.31 | ENSG00000154978 | vesicular, overexpressed in cancer, prosurvival protein 1 |

|               |      |      |                 |                                                         |
|---------------|------|------|-----------------|---------------------------------------------------------|
| FAM229B       | 0.72 | 4.21 | ENSG00000203778 | family with sequence similarity 229 member B            |
| MCTP1         | 0.72 | 1.98 | ENSG00000175471 | multiple C2 and transmembrane domain containing 1       |
| KIF12         | 0.72 | 5.61 | ENSG00000136883 | kinesin family member 12                                |
| ASMTL         | 0.72 | 7.29 | ENSG00000169093 | acetylserotonin O-methyltransferase-like                |
| ATP6V1F       | 0.72 | 8.22 | ENSG00000128524 | ATPase H <sup>+</sup> transporting V1 subunit F         |
| TCF21         | 0.72 | 4.91 | ENSG00000118526 | transcription factor 21                                 |
| TPT1          | 0.72 | 9.09 | ENSG00000133112 | tumor protein, translationally-controlled 1             |
| SMCO4         | 0.71 | 5.50 | ENSG00000166002 | single-pass membrane protein with coiled-coil domains 4 |
| LEPROTL1      | 0.71 | 5.90 | ENSG00000104660 | leptin receptor overlapping transcript-like 1           |
| RP11-465N4.4  | 0.71 | 3.03 | ENSG00000234678 | N/A                                                     |
| LGALS3        | 0.71 | 5.48 | ENSG00000131981 | galectin 3                                              |
| RP11-36C20.1  | 0.71 | 2.23 | ENSG00000240376 | N/A                                                     |
| CCDC28B       | 0.71 | 3.35 | ENSG00000160050 | coiled-coil domain containing 28B                       |
| UGGT2         | 0.71 | 4.55 | ENSG00000102595 | UDP-glucose glycoprotein glucosyltransferase 2          |
| FAM214B       | 0.71 | 6.08 | ENSG00000005238 | family with sequence similarity 214 member B            |
| C21orf59      | 0.71 | 6.20 | ENSG00000159079 | chromosome 21 open reading frame 59                     |
| TMEM167B      | 0.71 | 4.53 | ENSG00000215717 | transmembrane protein 167B                              |
| MDK           | 0.71 | 9.12 | ENSG00000110492 | midkine (neurite growth-promoting factor 2)             |
| CITF22-92A6.1 | 0.71 | 2.49 | ENSG00000273145 | N/A                                                     |
| GALK1         | 0.71 | 6.40 | ENSG00000108479 | galactokinase 1                                         |
| IRS2          | 0.71 | 3.30 | ENSG00000185950 | insulin receptor substrate 2                            |
| KCTD13        | 0.71 | 5.06 | ENSG00000174943 | potassium channel tetramerization domain containing 13  |
| ST3GAL3       | 0.71 | 3.10 | ENSG00000126091 | ST3 beta-galactoside alpha-2,3-sialyltransferase 3      |
| LIN7B         | 0.71 | 4.31 | ENSG00000104863 | lin-7 homolog B, crumbs cell polarity complex component |

|               |      |      |                 |                                                                                 |
|---------------|------|------|-----------------|---------------------------------------------------------------------------------|
| AHNAK         | 0.71 | 7.76 | ENSG00000124942 | AHNAK nucleoprotein                                                             |
| CAHM          | 0.71 | 1.22 | ENSG00000270419 | colon adenocarcinoma<br>hypermethylated (non-protein<br>coding)                 |
| PHF11         | 0.71 | 3.07 | ENSG00000136147 | PHD finger protein 11                                                           |
| ARHGAP4       | 0.71 | 1.70 | ENSG00000089820 | Rho GTPase activating protein 4                                                 |
| TMEM107       | 0.71 | 2.64 | ENSG00000179029 | transmembrane protein 107                                                       |
| RHPN1         | 0.71 | 5.58 | ENSG00000158106 | rhophilin Rho GTPase binding<br>protein 1                                       |
| ATP9A         | 0.71 | 5.27 | ENSG00000054793 | ATPase phospholipid transporting 9A<br>(putative)                               |
| GS1-393G12.12 | 0.71 | 2.07 | ENSG00000254690 | N/A                                                                             |
| GADD45A       | 0.71 | 3.90 | ENSG00000116717 | growth arrest and DNA damage<br>inducible alpha                                 |
| C20orf96      | 0.71 | 4.23 | ENSG00000196476 | chromosome 20 open reading frame<br>96                                          |
| DBNDD1        | 0.71 | 6.01 | ENSG00000003249 | dysbindin domain containing 1                                                   |
| FKBP2         | 0.71 | 8.23 | ENSG00000173486 | FK506 binding protein 2                                                         |
| ZNF524        | 0.71 | 4.77 | ENSG00000171443 | zinc finger protein 524                                                         |
| CTD-2015H6.3  | 0.71 | 2.60 | ENSG00000249042 | N/A                                                                             |
| CRTAP         | 0.71 | 8.45 | ENSG00000170275 | cartilage associated protein                                                    |
| COX7A2        | 0.71 | 8.33 | ENSG00000112695 | cytochrome c oxidase subunit 7A2                                                |
| CPED1         | 0.71 | 1.11 | ENSG00000106034 | cadherin like and PC-esterase<br>domain containing 1                            |
| KB-1440D3.13  | 0.71 | 1.11 | ENSG00000272954 | N/A                                                                             |
| ARHGEF17      | 0.70 | 2.73 | ENSG00000110237 | Rho guanine nucleotide exchange<br>factor 17                                    |
| SORT1         | 0.70 | 6.56 | ENSG00000134243 | sortilin 1                                                                      |
| ABCD1         | 0.70 | 7.10 | ENSG00000101986 | ATP binding cassette subfamily D<br>member 1                                    |
| MYL6          | 0.70 | 9.83 | ENSG00000092841 | myosin light chain 6                                                            |
| TMEM234       | 0.70 | 3.95 | ENSG00000160055 | transmembrane protein 234                                                       |
| TMA7          | 0.70 | 4.24 | ENSG00000232112 | translation machinery associated 7<br>homolog                                   |
| RBM20         | 0.70 | 1.54 | ENSG00000203867 | RNA binding motif protein 20                                                    |
| KCNMB4        | 0.70 | 2.20 | ENSG00000135643 | potassium calcium-activated channel<br>subfamily M regulatory beta subunit<br>4 |

|             |      |      |                 |                                                               |
|-------------|------|------|-----------------|---------------------------------------------------------------|
| ITIH5       | 0.70 | 4.20 | ENSG00000123243 | inter-alpha-trypsin inhibitor heavy chain family member 5     |
| PIGU        | 0.70 | 6.97 | ENSG00000101464 | phosphatidylinositol glycan anchor biosynthesis class U       |
| MLF1        | 0.70 | 4.37 | ENSG00000178053 | myeloid leukemia factor 1                                     |
| FKBP8       | 0.70 | 9.30 | ENSG00000105701 | FK506 binding protein 8                                       |
| TUB         | 0.70 | 2.61 | ENSG00000166402 | tubby bipartite transcription factor                          |
| EHHADH      | 0.70 | 2.15 | ENSG00000113790 | enoyl-CoA hydratase and 3-hydroxyacyl CoA dehydrogenase       |
| TFEB        | 0.70 | 3.58 | ENSG00000112561 | transcription factor EB                                       |
| FUOM        | 0.70 | 5.94 | ENSG00000148803 | fucose mutarotase                                             |
| DHRS1       | 0.70 | 5.61 | ENSG00000157379 | dehydrogenase/reductase 1                                     |
| COX6C       | 0.70 | 6.81 | ENSG00000164919 | cytochrome c oxidase subunit 6C                               |
| CFDP1       | 0.70 | 5.73 | ENSG00000153774 | craniofacial development protein 1                            |
| BX322557.10 | 0.70 | 1.81 | ENSG00000215447 | N/A                                                           |
| TBC1D19     | 0.70 | 1.81 | ENSG00000109680 | TBC1 domain family member 19                                  |
| COMMD1      | 0.70 | 5.10 | ENSG00000173163 | copper metabolism domain containing 1                         |
| OLFM2       | 0.70 | 6.30 | ENSG00000105088 | olfactomedin 2                                                |
| CYP2U1      | 0.70 | 2.09 | ENSG00000155016 | cytochrome P450 family 2 subfamily U member 1                 |
| ZNF493      | 0.70 | 2.09 | ENSG00000196268 | zinc finger protein 493                                       |
| CREG1       | 0.70 | 6.41 | ENSG00000143162 | cellular repressor of E1A stimulated genes 1                  |
| PPP1R14A    | 0.70 | 3.41 | ENSG00000167641 | protein phosphatase 1 regulatory inhibitor subunit 14A        |
| C19orf81    | 0.70 | 4.22 | ENSG00000235034 | chromosome 19 open reading frame 81                           |
| SHFM1       | 0.70 | 6.72 | ENSG00000127922 | split hand/foot malformation (ectrodactyly) type 1            |
| FGF12       | 0.70 | 4.05 | ENSG00000114279 | fibroblast growth factor 12                                   |
| CPAMD8      | 0.70 | 1.36 | ENSG00000160111 | C3 and PZP like, alpha-2-macroglobulin domain containing 8    |
| B3GNT4      | 0.70 | 2.67 | ENSG00000176383 | UDP-GlcNAc:betaGal beta-1,3-N-acetylglucosaminyltransferase 4 |
| PAGE2       | 0.70 | 4.15 | ENSG00000234068 | PAGE family member 2                                          |
| ARL6IP5     | 0.69 | 4.88 | ENSG00000144746 | ADP ribosylation factor like GTPase 6 interacting protein 5   |

|              |      |      |                 |                                                        |
|--------------|------|------|-----------------|--------------------------------------------------------|
| HOXA-AS2     | 0.69 | 5.16 | ENSG00000253552 | HOXA cluster antisense RNA 2                           |
| ADAMTSL4     | 0.69 | 6.65 | ENSG00000143382 | ADAMTS like 4                                          |
| FSTL3        | 0.69 | 6.54 | ENSG00000070404 | folliculin like 3                                      |
| CCDC92       | 0.69 | 5.65 | ENSG00000275035 | coiled-coil domain containing 92                       |
| PLCG2        | 0.69 | 3.05 | ENSG00000197943 | phospholipase C gamma 2                                |
| BLOC1S1      | 0.69 | 6.31 | ENSG00000135441 | biogenesis of lysosomal organelles complex 1 subunit 1 |
| CLTB         | 0.69 | 8.27 | ENSG00000175416 | clathrin light chain B                                 |
| ADAM19       | 0.69 | 6.01 | ENSG00000135074 | ADAM metalloproteinase domain 19                       |
| CLDN12       | 0.69 | 4.59 | ENSG00000157224 | claudin 12                                             |
| ADPRHL1      | 0.69 | 3.96 | ENSG00000153531 | ADP-ribosylhydrolase like 1                            |
| DHRS12       | 0.69 | 3.09 | ENSG00000102796 | dehydrogenase/reductase 12                             |
| C8A          | 0.69 | 1.58 | ENSG00000157131 | complement C8 alpha chain                              |
| ENTPD8       | 0.69 | 1.58 | ENSG00000188833 | ectonucleoside triphosphate diphosphohydrolase 8       |
| KCNH6        | 0.69 | 1.58 | ENSG00000173826 | potassium voltage-gated channel subfamily H member 6   |
| RNF11        | 0.69 | 4.47 | ENSG00000123091 | ring finger protein 11                                 |
| MRPL28       | 0.69 | 7.73 | ENSG00000086504 | mitochondrial ribosomal protein L28                    |
| KPTN         | 0.69 | 4.84 | ENSG00000118162 | kaptin, actin binding protein                          |
| ASB13        | 0.69 | 5.69 | ENSG00000196372 | ankyrin repeat and SOCS box containing 13              |
| ANKZF1       | 0.69 | 5.87 | ENSG00000163516 | ankyrin repeat and zinc finger domain containing 1     |
| TMEM59       | 0.69 | 6.89 | ENSG00000116209 | transmembrane protein 59                               |
| SEMA4D       | 0.69 | 3.70 | ENSG00000187764 | semaphorin 4D                                          |
| RP11-73M18.8 | 0.69 | 2.64 | ENSG00000269958 | N/A                                                    |
| NDRG4        | 0.69 | 2.29 | ENSG00000103034 | NDRG family member 4                                   |
| RTBDN        | 0.69 | 1.83 | ENSG00000132026 | retbindin                                              |
| LGALS9       | 0.69 | 1.15 | ENSG00000168961 | galectin 9                                             |
| ZFYVE1       | 0.69 | 4.18 | ENSG00000165861 | zinc finger FYVE-type containing 1                     |
| SLC9A5       | 0.69 | 2.05 | ENSG00000135740 | solute carrier family 9 member A5                      |
| INSR         | 0.69 | 6.05 | ENSG00000171105 | insulin receptor                                       |
| LIPC         | 0.69 | 6.42 | ENSG00000166035 | lipase C, hepatic type                                 |
| CRYL1        | 0.69 | 4.64 | ENSG00000165475 | crystallin lambda 1                                    |
| ORMDL2       | 0.69 | 6.24 | ENSG00000123353 | ORMDL sphingolipid biosynthesis regulator 2            |

|             |      |      |                 |                                                     |
|-------------|------|------|-----------------|-----------------------------------------------------|
| COMMD3      | 0.69 | 4.20 | ENSG00000148444 | COMM domain containing 3                            |
| TMEM25      | 0.69 | 1.49 | ENSG00000149582 | transmembrane protein 25                            |
| SLC22A18    | 0.69 | 7.70 | ENSG00000110628 | solute carrier family 22 member 18                  |
| PLD1        | 0.69 | 6.36 | ENSG00000075651 | phospholipase D1                                    |
| FLRT2       | 0.69 | 2.24 | ENSG00000185070 | fibronectin leucine rich<br>transmembrane protein 2 |
| PRRT1       | 0.69 | 2.24 | ENSG00000229071 | proline rich transmembrane protein 1                |
| SGPP1       | 0.69 | 3.55 | ENSG00000126821 | sphingosine-1-phosphate<br>phosphatase 1            |
| CYB561D1    | 0.68 | 2.56 | ENSG00000174151 | cytochrome b561 family member D1                    |
| DHRS4       | 0.68 | 1.99 | ENSG00000157326 | dehydrogenase/reductase 4                           |
| HEXDC       | 0.68 | 5.04 | ENSG00000169660 | hexosaminidase D                                    |
| FADS3       | 0.68 | 6.04 | ENSG00000221968 | fatty acid desaturase 3                             |
| NOMO1       | 0.68 | 6.50 | ENSG00000274779 | NODAL modulator 1                                   |
| FDXR        | 0.68 | 4.94 | ENSG00000161513 | ferredoxin reductase                                |
| PLAC8       | 0.68 | 4.71 | ENSG00000145287 | placenta specific 8                                 |
| TMED3       | 0.68 | 8.20 | ENSG00000166557 | transmembrane p24 trafficking<br>protein 3          |
| RP4-568F9.6 | 0.68 | 1.04 | ENSG00000230010 | N/A                                                 |
| MYL6B       | 0.68 | 6.73 | ENSG00000196465 | myosin light chain 6B                               |
| THYN1       | 0.68 | 5.65 | ENSG00000151500 | thymocyte nuclear protein 1                         |
| SLC25A27    | 0.68 | 2.13 | ENSG00000153291 | solute carrier family 25 member 27                  |
| BTN3A2      | 0.68 | 4.54 | ENSG00000186470 | butyrophilin subfamily 3 member A2                  |
| IMPDH1      | 0.68 | 6.42 | ENSG00000106348 | inosine monophosphate<br>dehydrogenase 1            |
| TBC1D17     | 0.68 | 7.61 | ENSG00000104946 | TBC1 domain family member 17                        |
| RAB3A       | 0.68 | 3.08 | ENSG00000105649 | RAB3A, member RAS oncogene<br>family                |
| TTLL7       | 0.68 | 3.08 | ENSG00000137941 | tubulin tyrosine ligase like 7                      |
| TPGS1       | 0.68 | 3.99 | ENSG00000141933 | tubulin polyglutamylase complex<br>subunit 1        |
| FKBP10      | 0.68 | 8.68 | ENSG00000141756 | FK506 binding protein 10                            |
| NBPF10      | 0.68 | 2.43 | ENSG00000271425 | neuroblastoma breakpoint family<br>member 10        |
| MLPH        | 0.68 | 7.98 | ENSG00000115648 | melanophilin                                        |
| RPL36AL     | 0.68 | 8.17 | ENSG00000165502 | ribosomal protein L36a like                         |
| HFE2        | 0.68 | 1.30 | ENSG00000168509 | hemochromatosis type 2 (juvenile)                   |

|               |      |       |                 |                                                                               |
|---------------|------|-------|-----------------|-------------------------------------------------------------------------------|
| BICC1         | 0.68 | 3.45  | ENSG00000122870 | BicC family RNA binding protein 1                                             |
| CHCHD1        | 0.68 | 5.97  | ENSG00000172586 | coiled-coil-helix-coiled-coil-helix domain containing 1                       |
| RP11-223I10.1 | 0.68 | 2.38  | ENSG00000261829 | N/A                                                                           |
| RP11-49I11.1  | 0.67 | 4.15  | ENSG00000260552 | N/A                                                                           |
| DSCAM-AS1     | 0.67 | 8.27  | ENSG00000235123 | DSCAM antisense RNA 1                                                         |
| NDUFA1        | 0.67 | 7.41  | ENSG00000125356 | NADH:ubiquinone oxidoreductase subunit A1                                     |
| ATP5I         | 0.67 | 6.93  | ENSG00000169020 | ATP synthase, H <sup>+</sup> transporting, mitochondrial Fo complex subunit E |
| CACNA1H       | 0.67 | 7.05  | ENSG00000196557 | calcium voltage-gated channel subunit alpha 1 H                               |
| CNKSR1        | 0.67 | 1.52  | ENSG00000142675 | connector enhancer of kinase suppressor of Ras 1                              |
| LINC00910     | 0.67 | 1.52  | ENSG00000188825 | long intergenic non-protein coding RNA 910                                    |
| EXOC4         | 0.67 | 5.43  | ENSG00000131558 | exocyst complex component 4                                                   |
| C11orf49      | 0.67 | 5.93  | ENSG00000149179 | chromosome 11 open reading frame 49                                           |
| HIPK3         | 0.67 | 4.15  | ENSG00000110422 | homeodomain interacting protein kinase 3                                      |
| LHFPL2        | 0.67 | 4.85  | ENSG00000145685 | lipoma HMGIC fusion partner-like 2                                            |
| PLP2          | 0.67 | 8.17  | ENSG00000102007 | proteolipid protein 2                                                         |
| UCN           | 0.67 | 3.11  | ENSG00000163794 | urocortin                                                                     |
| ABCA2         | 0.67 | 6.39  | ENSG00000107331 | ATP binding cassette subfamily A member 2                                     |
| SCARB1        | 0.67 | 10.05 | ENSG00000073060 | scavenger receptor class B member 1                                           |
| ZNF333        | 0.67 | 1.95  | ENSG00000160961 | zinc finger protein 333                                                       |
| FAM171B       | 0.67 | 3.27  | ENSG00000144369 | family with sequence similarity 171 member B                                  |
| TMEM86B       | 0.67 | 6.16  | ENSG00000180089 | transmembrane protein 86B                                                     |
| SMPDL3B       | 0.67 | 4.38  | ENSG00000130768 | sphingomyelin phosphodiesterase acid like 3B                                  |
| GSTM4         | 0.67 | 6.25  | ENSG00000168765 | glutathione S-transferase mu 4                                                |
| RBPMS-AS1     | 0.67 | 5.80  | ENSG00000254109 | RBPMS antisense RNA 1                                                         |
| MUC1          | 0.67 | 2.40  | ENSG00000185499 | mucin 1, cell surface associated                                              |
| FGFR1         | 0.67 | 5.58  | ENSG00000077782 | fibroblast growth factor receptor 1                                           |

|         |      |       |                 |                                                  |
|---------|------|-------|-----------------|--------------------------------------------------|
| COX7B   | 0.67 | 8.39  | ENSG00000131174 | cytochrome c oxidase subunit 7B                  |
| MSI1    | 0.67 | 4.75  | ENSG00000135097 | musashi RNA binding protein 1                    |
| KRCC1   | 0.67 | 2.23  | ENSG00000172086 | lysine rich coiled-coil 1                        |
| C9orf16 | 0.67 | 7.04  | ENSG00000171159 | chromosome 9 open reading frame<br>16            |
| MLLT3   | 0.67 | 2.83  | ENSG00000171843 | MLLT3, super elongation complex<br>subunit       |
| CCS     | 0.67 | 6.09  | ENSG00000173992 | copper chaperone for superoxide<br>dismutase     |
| C1D     | 0.67 | 2.61  | ENSG00000197223 | C1D nuclear receptor corepressor                 |
| CALM2   | 0.67 | 9.43  | ENSG00000143933 | calmodulin 2                                     |
| GPR137C | 0.67 | 2.35  | ENSG00000180998 | G protein-coupled receptor 137C                  |
| WDR5B   | 0.67 | 2.35  | ENSG00000196981 | WD repeat domain 5B                              |
| HSPA1A  | 0.67 | 6.96  | ENSG00000234475 | heat shock protein family A (Hsp70)<br>member 1A |
| TMEM141 | 0.67 | 8.06  | ENSG00000244187 | transmembrane protein 141                        |
| NLRX1   | 0.67 | 5.10  | ENSG00000160703 | NLR family member X1                             |
| ALKBH6  | 0.67 | 3.45  | ENSG00000239382 | alkB homolog 6                                   |
| CTSF    | 0.66 | 5.62  | ENSG00000174080 | cathepsin F                                      |
| NFIC    | 0.66 | 5.69  | ENSG00000141905 | nuclear factor I C                               |
| ANAPC16 | 0.66 | 6.23  | ENSG00000166295 | anaphase promoting complex subunit<br>16         |
| RTN4R   | 0.66 | 3.43  | ENSG00000040608 | reticulon 4 receptor                             |
| PTK7    | 0.66 | 3.06  | ENSG00000112655 | protein tyrosine kinase 7 (inactive)             |
| NUDT12  | 0.66 | 2.57  | ENSG00000112874 | nudix hydrolase 12                               |
| PSENEN  | 0.66 | 7.03  | ENSG00000205155 | presenilin enhancer gamma-secretase<br>subunit   |
| TBX6    | 0.66 | 2.30  | ENSG00000149922 | T-box 6                                          |
| TCEB2   | 0.66 | 8.02  | ENSG00000103363 | transcription elongation factor B<br>subunit 2   |
| PFN1    | 0.66 | 10.72 | ENSG00000108518 | profilin 1                                       |
| ABCA1   | 0.66 | 5.04  | ENSG00000165029 | ATP binding cassette subfamily A<br>member 1     |
| HHAT    | 0.66 | 1.34  | ENSG00000280680 | hedgehog acyltransferase                         |
| ZNF287  | 0.66 | 1.34  | ENSG00000141040 | zinc finger protein 287                          |
| PDLIM2  | 0.66 | 2.84  | ENSG00000120913 | PDZ and LIM domain 2                             |



|          |      |      |                 |                                                     |
|----------|------|------|-----------------|-----------------------------------------------------|
| UQCRB    | 0.66 | 7.87 | ENSG00000156467 | ubiquinol-cytochrome c reductase binding protein    |
| CYB5D2   | 0.66 | 3.23 | ENSG00000167740 | cytochrome b5 domain containing 2                   |
| RAB8B    | 0.66 | 4.46 | ENSG00000166128 | RAB8B, member RAS oncogene family                   |
| TMEM106B | 0.66 | 4.98 | ENSG00000106460 | transmembrane protein 106B                          |
| TMEM30A  | 0.66 | 6.06 | ENSG00000112697 | transmembrane protein 30A                           |
| DYNLT3   | 0.66 | 4.93 | ENSG00000165169 | dynein light chain Tctex-type 3                     |
| MXD3     | 0.66 | 5.16 | ENSG00000213347 | MAX dimerization protein 3                          |
| IL13RA1  | 0.66 | 6.48 | ENSG00000131724 | interleukin 13 receptor subunit alpha 1             |
| SIAE     | 0.66 | 4.09 | ENSG00000110013 | sialic acid acetyltransferase                       |
| CD99     | 0.66 | 9.52 | ENSG00000002586 | CD99 molecule                                       |
| FUCA1    | 0.66 | 5.90 | ENSG00000179163 | fucosidase, alpha-L- 1, tissue                      |
| GNS      | 0.66 | 7.67 | ENSG00000135677 | glucosamine (N-acetyl)-6-sulfatase                  |
| SPRYD3   | 0.66 | 6.52 | ENSG00000167778 | SPRY domain containing 3                            |
| IPP      | 0.66 | 1.24 | ENSG00000197429 | intracisternal A particle-promoted polypeptide      |
| UNC13D   | 0.66 | 1.24 | ENSG00000092929 | unc-13 homolog D                                    |
| IRF9     | 0.65 | 1.47 | ENSG00000213928 | interferon regulatory factor 9                      |
| EMP2     | 0.65 | 4.79 | ENSG00000213853 | epithelial membrane protein 2                       |
| SIRT4    | 0.65 | 2.00 | ENSG00000089163 | sirtuin 4                                           |
| ST20     | 0.65 | 3.46 | ENSG00000180953 | suppressor of tumorigenicity 20                     |
| CHID1    | 0.65 | 6.60 | ENSG00000177830 | chitinase domain containing 1                       |
| IDH2     | 0.65 | 8.55 | ENSG00000182054 | isocitrate dehydrogenase (NADP(+)) 2, mitochondrial |
| SEMA6C   | 0.65 | 5.25 | ENSG00000143434 | semaphorin 6C                                       |
| AMOT     | 0.65 | 3.07 | ENSG00000126016 | angiominin                                          |
| P4HA2    | 0.65 | 5.48 | ENSG00000072682 | prolyl 4-hydroxylase subunit alpha 2                |
| NID1     | 0.65 | 8.40 | ENSG00000116962 | nidogen 1                                           |
| PYY      | 0.65 | 1.78 | ENSG00000131096 | peptide YY                                          |
| GABBR1   | 0.65 | 6.67 | ENSG00000237112 | gamma-aminobutyric acid type B receptor subunit 1   |
| MORN2    | 0.65 | 3.95 | ENSG00000188010 | MORN repeat containing 2                            |
| YJEFN3   | 0.65 | 3.95 | ENSG00000250067 | YjeF N-terminal domain containing 3                 |
| RABAC1   | 0.65 | 8.61 | ENSG00000105404 | Rab acceptor 1                                      |

|         |      |      |                 |                                                       |
|---------|------|------|-----------------|-------------------------------------------------------|
| SDHAF2  | 0.65 | 4.69 | ENSG00000167985 | succinate dehydrogenase complex assembly factor 2     |
| ABHD16B | 0.65 | 3.34 | ENSG00000183260 | abhydrolase domain containing 16B                     |
| FMNL2   | 0.65 | 4.76 | ENSG00000157827 | formin like 2                                         |
| DNAJB5  | 0.65 | 3.99 | ENSG00000137094 | DnaJ heat shock protein family (Hsp40) member B5      |
| VWA5A   | 0.64 | 4.76 | ENSG00000110002 | von Willebrand factor A domain containing 5A          |
| UROS    | 0.64 | 6.16 | ENSG00000188690 | uroporphyrinogen III synthase                         |
| PLOD1   | 0.64 | 9.37 | ENSG00000083444 | procollagen-lysine,2-oxoglutarate 5-dioxygenase 1     |
| SPTLC2  | 0.64 | 4.48 | ENSG00000100596 | serine palmitoyltransferase long chain base subunit 2 |
| RPS29   | 0.64 | 6.78 | ENSG00000213741 | ribosomal protein S29                                 |
| EPDR1   | 0.64 | 3.76 | ENSG00000086289 | ependymin related 1                                   |
| AGBL3   | 0.64 | 1.51 | ENSG00000146856 | ATP/GTP binding protein like 3                        |
| RASSF5  | 0.64 | 3.44 | ENSG00000266094 | Ras association domain family member 5                |
| CYSTM1  | 0.64 | 7.77 | ENSG00000120306 | cysteine rich transmembrane module containing 1       |
| PPP1R1A | 0.64 | 2.24 | ENSG00000135447 | protein phosphatase 1 regulatory inhibitor subunit 1A |
| TRIOBP  | 0.64 | 4.61 | ENSG00000100106 | TRIO and F-actin binding protein                      |
| AIG1    | 0.64 | 6.71 | ENSG00000146416 | androgen induced 1                                    |
| OTUB2   | 0.64 | 3.02 | ENSG00000277276 | OTU deubiquitinase, ubiquitin aldehyde binding 2      |
| SLFN5   | 0.64 | 3.02 | ENSG00000166750 | schlafen family member 5                              |
| LRRC23  | 0.64 | 4.43 | ENSG00000010626 | leucine rich repeat containing 23                     |
| RASA3   | 0.64 | 1.28 | ENSG00000280477 | RAS p21 protein activator 3                           |
| MAGEH1  | 0.64 | 3.85 | ENSG00000187601 | MAGE family member H1                                 |
| SH3BP1  | 0.64 | 2.86 | ENSG00000100092 | SH3 domain binding protein 1                          |
| CYP24A1 | 0.64 | 6.01 | ENSG00000019186 | cytochrome P450 family 24 subfamily A member 1        |
| EXOC3L4 | 0.64 | 5.38 | ENSG00000205436 | exocyst complex component 3 like 4                    |
| CNTNAP4 | 0.64 | 2.31 | ENSG00000152910 | contactin associated protein like 4                   |
| PCBD1   | 0.64 | 7.81 | ENSG00000166228 | pterin-4 alpha-carbinolamine dehydratase 1            |

|               |      |       |                 |                                                                             |
|---------------|------|-------|-----------------|-----------------------------------------------------------------------------|
| PODXL2        | 0.64 | 6.40  | ENSG00000114631 | podocalyxin like 2                                                          |
| SERPINA1      | 0.64 | 13.65 | ENSG00000197249 | serpin family A member 1                                                    |
| AC074212.5    | 0.64 | 2.49  | ENSG00000259605 | N/A                                                                         |
| CDK5RAP3      | 0.64 | 6.58  | ENSG00000108465 | CDK5 regulatory subunit associated protein 3                                |
| CLUAP1        | 0.64 | 3.68  | ENSG00000103351 | clusterin associated protein 1                                              |
| ING4          | 0.64 | 4.33  | ENSG00000111653 | inhibitor of growth family member 4                                         |
| TMEM175       | 0.64 | 5.59  | ENSG00000127419 | transmembrane protein 175                                                   |
| RP11-295G20.2 | 0.64 | 5.44  | ENSG00000233461 | N/A                                                                         |
| TP53I3        | 0.64 | 5.82  | ENSG00000115129 | tumor protein p53 inducible protein 3                                       |
| SGSM1         | 0.64 | 2.88  | ENSG00000167037 | small G protein signaling modulator 1                                       |
| GS1-358P8.4   | 0.63 | 4.88  | ENSG00000260822 | N/A                                                                         |
| CYB5RL        | 0.63 | 1.42  | ENSG00000215883 | cytochrome b5 reductase like                                                |
| OSBPL10       | 0.63 | 1.90  | ENSG00000144645 | oxysterol binding protein like 10                                           |
| PROX1-AS1     | 0.63 | 2.26  | ENSG00000272167 | N/A                                                                         |
| LRRC27        | 0.63 | 3.34  | ENSG00000148814 | leucine rich repeat containing 27                                           |
| TCIRG1        | 0.63 | 7.51  | ENSG00000110719 | T-cell immune regulator 1, ATPase H <sup>+</sup> transporting V0 subunit a3 |
| SPAG4         | 0.63 | 4.03  | ENSG00000061656 | sperm associated antigen 4                                                  |
| AMN           | 0.63 | 6.08  | ENSG00000166126 | amnion associated transmembrane protein                                     |
| PMF1          | 0.63 | 5.96  | ENSG00000160783 | polyamine modulated factor 1                                                |
| PLSCR1        | 0.63 | 2.84  | ENSG00000188313 | phospholipid scramblase 1                                                   |
| MSTO2P        | 0.63 | 1.73  | ENSG00000203761 | misato family member 2, pseudogene                                          |
| ZNF514        | 0.63 | 1.73  | ENSG00000144026 | zinc finger protein 514                                                     |
| NSMCE1        | 0.63 | 6.29  | ENSG00000169189 | NSE1 homolog, SMC5-SMC6 complex component                                   |
| BSG           | 0.63 | 10.79 | ENSG00000172270 | basigin (Ok blood group)                                                    |
| MRPL17        | 0.63 | 6.93  | ENSG00000158042 | mitochondrial ribosomal protein L17                                         |
| DGCR5         | 0.63 | 3.74  | ENSG00000237517 | DiGeorge syndrome critical region gene 5 (non-protein coding)               |
| OR7E38P       | 0.63 | 3.74  | ENSG00000183444 | olfactory receptor family 7 subfamily E member 38 pseudogene                |
| MPZL2         | 0.63 | 4.98  | ENSG00000149573 | myelin protein zero like 2                                                  |
| ATP11C        | 0.63 | 3.73  | ENSG00000101974 | ATPase phospholipid transporting 11C                                        |

|              |      |       |                 |                                                                        |
|--------------|------|-------|-----------------|------------------------------------------------------------------------|
| CYBA         | 0.63 | 10.08 | ENSG00000051523 | cytochrome b-245 alpha chain                                           |
| SPPL2B       | 0.63 | 6.26  | ENSG00000005206 | signal peptide peptidase like 2B                                       |
| C1R          | 0.63 | 2.21  | ENSG00000159403 | complement C1r                                                         |
| EDARADD      | 0.63 | 2.21  | ENSG00000186197 | EDAR associated death domain                                           |
| CCDC96       | 0.63 | 1.54  | ENSG00000173013 | coiled-coil domain containing 96                                       |
| CTC-308K20.1 | 0.63 | 1.54  | ENSG00000204758 | N/A                                                                    |
| METRNL       | 0.63 | 3.12  | ENSG00000275031 | meteorin like, glial cell differentiation regulator                    |
| ZNF165       | 0.63 | 2.40  | ENSG00000197279 | zinc finger protein 165                                                |
| ACOT13       | 0.63 | 6.13  | ENSG00000112304 | acyl-CoA thioesterase 13                                               |
| CEP57L1      | 0.63 | 3.26  | ENSG00000183137 | centrosomal protein 57 like 1                                          |
| JAM3         | 0.63 | 2.08  | ENSG00000166086 | junctional adhesion molecule 3                                         |
| SHKBP1       | 0.63 | 8.22  | ENSG00000160410 | SH3KBP1 binding protein 1                                              |
| PDGFC        | 0.63 | 3.20  | ENSG00000145431 | platelet derived growth factor C                                       |
| ITGB1BP2     | 0.63 | 1.32  | ENSG00000147166 | integrin subunit beta 1 binding protein 2                              |
| PDGFD        | 0.63 | 1.32  | ENSG00000170962 | platelet derived growth factor D                                       |
| TNRC6C-AS1   | 0.63 | 1.32  | ENSG00000204282 | TNRC6C antisense RNA 1                                                 |
| GABARAPL2    | 0.63 | 5.46  | ENSG00000034713 | GABA type A receptor associated protein like 2                         |
| PMVK         | 0.63 | 6.39  | ENSG00000163344 | phosphomevalonate kinase                                               |
| CKAP4        | 0.63 | 8.61  | ENSG00000136026 | cytoskeleton associated protein 4                                      |
| ELOVL4       | 0.63 | 1.93  | ENSG00000118402 | ELOVL fatty acid elongase 4                                            |
| ARRDC3       | 0.63 | 2.35  | ENSG00000113369 | arrestin domain containing 3                                           |
| FAM86JP      | 0.63 | 2.35  | ENSG00000171084 | family with sequence similarity 86 member J, pseudogene                |
| BAZ2B        | 0.63 | 2.68  | ENSG00000123636 | bromodomain adjacent to zinc finger domain 2B                          |
| ANKRD42      | 0.62 | 2.82  | ENSG00000137494 | ankyrin repeat domain 42                                               |
| NPAS2        | 0.62 | 4.13  | ENSG00000170485 | neuronal PAS domain protein 2                                          |
| C14orf166    | 0.62 | 7.11  | ENSG00000087302 | chromosome 14 open reading frame 166                                   |
| FLOT2        | 0.62 | 8.01  | ENSG00000132589 | flotillin 2                                                            |
| RBPJ         | 0.62 | 5.32  | ENSG00000168214 | recombination signal binding protein for immunoglobulin kappa J region |
| D2HGDH       | 0.62 | 3.60  | ENSG00000180902 | D-2-hydroxyglutarate dehydrogenase                                     |
| ENO4         | 0.62 | 1.76  | ENSG00000188316 | enolase family member 4                                                |

|               |      |      |                 |                                                                     |
|---------------|------|------|-----------------|---------------------------------------------------------------------|
| NIPAL3        | 0.62 | 3.25 | ENSG0000001461  | NIPA like domain containing 3                                       |
| ECHDC2        | 0.62 | 5.94 | ENSG00000121310 | enoyl-CoA hydratase domain containing 2                             |
| PEX11A        | 0.62 | 3.15 | ENSG00000166821 | peroxisomal biogenesis factor 11 alpha                              |
| CHD6          | 0.62 | 4.26 | ENSG00000124177 | chromodomain helicase DNA binding protein 6                         |
| AMT           | 0.62 | 1.45 | ENSG00000145020 | aminomethyltransferase                                              |
| COQ7          | 0.62 | 2.92 | ENSG00000167186 | coenzyme Q7, hydroxylase                                            |
| RP11-403I13.8 | 0.62 | 2.92 | ENSG00000272419 | N/A                                                                 |
| KLRC2         | 0.62 | 1.06 | ENSG00000205809 | killer cell lectin like receptor C2                                 |
| PSPN          | 0.62 | 2.48 | ENSG00000125650 | persephin                                                           |
| KPNA5         | 0.62 | 3.08 | ENSG00000196911 | karyopherin subunit alpha 5                                         |
| CAMK2N1       | 0.62 | 7.01 | ENSG00000162545 | calcium/calmodulin dependent protein kinase II inhibitor 1          |
| HID1          | 0.62 | 7.41 | ENSG00000167861 | HID1 domain containing                                              |
| EFHC1         | 0.62 | 3.97 | ENSG00000096093 | EF-hand domain containing 1                                         |
| HLA-L         | 0.62 | 2.84 | ENSG00000243753 | major histocompatibility complex, class I, L (pseudogene)           |
| CORO1A        | 0.62 | 2.10 | ENSG00000102879 | coronin 1A                                                          |
| MAPKAPK5-AS1  | 0.62 | 5.34 | ENSG00000234608 | MAPKAPK5 antisense RNA 1                                            |
| MID1          | 0.62 | 7.91 | ENSG00000101871 | midline 1                                                           |
| HOXA2         | 0.62 | 1.86 | ENSG00000105996 | homeobox A2                                                         |
| GSTM3         | 0.62 | 6.92 | ENSG00000134202 | glutathione S-transferase mu 3                                      |
| PPP1R14BP3    | 0.62 | 3.48 | ENSG00000179967 | protein phosphatase 1 regulatory inhibitor subunit 14B pseudogene 3 |
| EAPP          | 0.62 | 4.52 | ENSG00000129518 | E2F associated phosphoprotein                                       |
| GOLGA8A       | 0.62 | 3.16 | ENSG00000175265 | golgin A8 family member A                                           |
| FHL2          | 0.62 | 1.57 | ENSG00000115641 | four and a half LIM domains 2                                       |
| TCP11L1       | 0.62 | 3.30 | ENSG00000176148 | t-complex 11 like 1                                                 |
| PPP3CB        | 0.62 | 4.19 | ENSG00000107758 | protein phosphatase 3 catalytic subunit beta                        |
| PRSS12        | 0.62 | 4.49 | ENSG00000164099 | protease, serine 12                                                 |
| KDEL3         | 0.62 | 3.96 | ENSG00000100196 | KDEL endoplasmic reticulum protein retention receptor 3             |
| PNRC2         | 0.62 | 1.22 | ENSG00000189266 | proline rich nuclear receptor coactivator 2                         |

|              |      |      |                 |                                                          |
|--------------|------|------|-----------------|----------------------------------------------------------|
| RP11-108M9.4 | 0.62 | 1.22 | ENSG00000238142 | N/A                                                      |
| TMEM45A      | 0.62 | 4.40 | ENSG00000181458 | transmembrane protein 45A                                |
| PLEKHA4      | 0.62 | 4.29 | ENSG00000105559 | pleckstrin homology domain containing A4                 |
| VPS37D       | 0.62 | 2.97 | ENSG00000176428 | VPS37D, ESCRT-I subunit                                  |
| YIPF4        | 0.62 | 4.90 | ENSG00000119820 | Yip1 domain family member 4                              |
| SLC25A14     | 0.62 | 4.28 | ENSG00000102078 | solute carrier family 25 member 14                       |
| PTRHD1       | 0.62 | 5.65 | ENSG00000184924 | peptidyl-tRNA hydrolase domain containing 1              |
| CTC-548K16.1 | 0.62 | 1.69 | ENSG00000267147 | N/A                                                      |
| ALG3         | 0.62 | 9.09 | ENSG00000214160 | ALG3, alpha-1,3-mannosyltransferase                      |
| LRP1         | 0.62 | 8.37 | ENSG00000123384 | LDL receptor related protein 1                           |
| ZNF487       | 0.61 | 2.04 | ENSG00000243660 | zinc finger protein 487                                  |
| PLXNA3       | 0.61 | 4.84 | ENSG00000130827 | plexin A3                                                |
| C14orf105    | 0.61 | 4.28 | ENSG00000100557 | chromosome 14 open reading frame 105                     |
| SHF          | 0.61 | 4.35 | ENSG00000138606 | Src homology 2 domain containing F                       |
| LUCAT1       | 0.61 | 2.76 | ENSG00000248323 | lung cancer associated transcript 1 (non-protein coding) |
| PFDN4        | 0.61 | 5.79 | ENSG00000101132 | prefoldin subunit 4                                      |
| SH3BGR       | 0.61 | 1.36 | ENSG00000185437 | SH3 domain binding glutamate rich protein                |
| MNS1         | 0.61 | 2.39 | ENSG00000138587 | meiosis specific nuclear structural 1                    |
| ZNF91        | 0.61 | 2.81 | ENSG00000167232 | zinc finger protein 91                                   |
| MAGEA10      | 0.61 | 3.14 | ENSG00000124260 | MAGE family member A10                                   |
| VASH1        | 0.61 | 3.41 | ENSG00000071246 | vasohibin 1                                              |
| TLE6         | 0.61 | 4.97 | ENSG00000104953 | transducin like enhancer of split 6                      |
| RAB31        | 0.61 | 6.12 | ENSG00000168461 | RAB31, member RAS oncogene family                        |
| CCDC71L      | 0.61 | 3.03 | ENSG00000253276 | coiled-coil domain containing 71-like                    |
| CCDC134      | 0.61 | 2.67 | ENSG00000100147 | coiled-coil domain containing 134                        |
| AGTR1        | 0.61 | 5.13 | ENSG00000144891 | angiotensin II receptor type 1                           |
| NMB          | 0.61 | 3.90 | ENSG00000197696 | neuromedin B                                             |
| MUC2         | 0.61 | 2.91 | ENSG00000278466 | mucin 2, oligomeric mucus/gel-forming                    |

|               |      |      |                 |                                                                 |
|---------------|------|------|-----------------|-----------------------------------------------------------------|
| LTBP4         | 0.61 | 7.87 | ENSG00000090006 | latent transforming growth factor<br>beta binding protein 4     |
| ALPK1         | 0.61 | 1.49 | ENSG00000073331 | alpha kinase 1                                                  |
| RP13-890H12.2 | 0.61 | 1.49 | ENSG00000267288 | N/A                                                             |
| CERS5         | 0.61 | 5.90 | ENSG00000139624 | ceramide synthase 5                                             |
| TM7SF2        | 0.61 | 7.92 | ENSG00000149809 | transmembrane 7 superfamily<br>member 2                         |
| CD99L2        | 0.61 | 5.91 | ENSG00000102181 | CD99 molecule like 2                                            |
| SERPINH1      | 0.61 | 5.45 | ENSG00000149257 | serpin family H member 1                                        |
| ATRAID        | 0.61 | 8.17 | ENSG00000138085 | all-trans retinoic acid induced<br>differentiation factor       |
| POLD4         | 0.61 | 4.90 | ENSG00000175482 | DNA polymerase delta 4, accessory<br>subunit                    |
| C16orf74      | 0.61 | 1.61 | ENSG00000154102 | chromosome 16 open reading frame<br>74                          |
| CFI           | 0.61 | 3.97 | ENSG00000205403 | complement factor I                                             |
| OXLD1         | 0.61 | 5.98 | ENSG00000204237 | oxidoreductase like domain<br>containing 1                      |
| OXTR          | 0.61 | 1.11 | ENSG00000180914 | oxytocin receptor                                               |
| RPS6KA6       | 0.61 | 1.11 | ENSG00000072133 | ribosomal protein S6 kinase A6                                  |
| BRE           | 0.61 | 6.41 | ENSG00000158019 | brain and reproductive organ-<br>expressed (TNFRSF1A modulator) |
| PLEKHN1       | 0.61 | 1.72 | ENSG00000187583 | pleckstrin homology domain<br>containing N1                     |
| TSPAN33       | 0.61 | 5.30 | ENSG00000158457 | tetraspanin 33                                                  |
| SNTA1         | 0.61 | 6.84 | ENSG00000101400 | syntrophin alpha 1                                              |
| FAM210B       | 0.61 | 5.90 | ENSG00000124098 | family with sequence similarity 210<br>member B                 |
| SBK1          | 0.60 | 3.01 | ENSG00000188322 | SH3 domain binding kinase 1                                     |
| RHBDD2        | 0.60 | 7.16 | ENSG00000005486 | rhomboid domain containing 2                                    |
| CELSR2        | 0.60 | 4.91 | ENSG00000143126 | cadherin EGF LAG seven-pass G-<br>type receptor 2               |
| KRBOX1        | 0.60 | 1.26 | ENSG00000240747 | KRAB box domain containing 1                                    |
| SNAI3         | 0.60 | 1.26 | ENSG00000185669 | snail family transcriptional repressor<br>3                     |
| TP73          | 0.60 | 1.26 | ENSG00000078900 | tumor protein p73                                               |
| CASP4         | 0.60 | 4.45 | ENSG00000196954 | caspase 4                                                       |

|           |       |      |                 |                                                                                                   |
|-----------|-------|------|-----------------|---------------------------------------------------------------------------------------------------|
| TFPI2     | 0.60  | 1.91 | ENSG00000105825 | tissue factor pathway inhibitor 2                                                                 |
| HOMER3    | 0.60  | 3.95 | ENSG00000051128 | homer scaffolding protein 3                                                                       |
| MPND      | 0.60  | 4.84 | ENSG00000008382 | MPN domain containing                                                                             |
| HDDC2     | 0.60  | 6.51 | ENSG00000111906 | HD domain containing 2                                                                            |
| ARHGAP42  | 0.60  | 2.00 | ENSG00000165895 | Rho GTPase activating protein 42                                                                  |
| TMCC1-AS1 | 0.60  | 2.00 | ENSG00000271270 | TMCC1 antisense RNA 1 (head to head)                                                              |
| MPP7      | 0.60  | 1.40 | ENSG00000150054 | membrane palmitoylated protein 7                                                                  |
| ARHGEF10  | 0.60  | 2.81 | ENSG00000274726 | Rho guanine nucleotide exchange factor 10                                                         |
| ELF2      | -0.60 | 2.89 | ENSG00000109381 | E74 like ETS transcription factor 2                                                               |
| BOD1      | -0.60 | 5.93 | ENSG00000145919 | bioorientation of chromosomes in cell division 1                                                  |
| HNRNPH1   | -0.60 | 7.75 | ENSG00000169045 | heterogeneous nuclear ribonucleoprotein H1 (H)                                                    |
| NAMPT     | -0.60 | 4.02 | ENSG00000105835 | nicotinamide phosphoribosyltransferase                                                            |
| HIRA      | -0.60 | 3.85 | ENSG00000100084 | histone cell cycle regulator                                                                      |
| RAD51D    | -0.60 | 3.16 | ENSG00000185379 | RAD51 paralog D                                                                                   |
| METTL21A  | -0.60 | 4.70 | ENSG00000144401 | methyltransferase like 21A                                                                        |
| ZMYM5     | -0.60 | 1.38 | ENSG00000132950 | zinc finger MYM-type containing 5                                                                 |
| ZNF891    | -0.60 | 1.38 | ENSG00000214029 | zinc finger protein 891                                                                           |
| SBDS      | -0.60 | 4.74 | ENSG00000126524 | SBDS ribosome assembly guanine nucleotide exchange factor                                         |
| USP34     | -0.60 | 4.62 | ENSG00000115464 | ubiquitin specific peptidase 34                                                                   |
| NUDT15    | -0.60 | 4.06 | ENSG00000136159 | nudix hydrolase 15                                                                                |
| SKI       | -0.60 | 5.43 | ENSG00000157933 | SKI proto-oncogene                                                                                |
| CAD       | -0.60 | 7.71 | ENSG00000084774 | carbamoyl-phosphate synthetase 2, aspartate transcarbamylase, and dihydroorotase                  |
| SMARCD1   | -0.60 | 7.43 | ENSG00000066117 | SWI/SNF related, matrix associated, actin dependent regulator of chromatin, subfamily d, member 1 |
| ADCY3     | -0.60 | 3.95 | ENSG00000138031 | adenylate cyclase 3                                                                               |
| PHF12     | -0.60 | 5.84 | ENSG00000109118 | PHD finger protein 12                                                                             |
| C21orf91  | -0.61 | 2.98 | ENSG00000154642 | chromosome 21 open reading frame 91                                                               |



|               |       |      |                 |                                                               |
|---------------|-------|------|-----------------|---------------------------------------------------------------|
| PRR22         | -0.61 | 4.04 | ENSG00000212123 | proline rich 22                                               |
| DCLRE1A       | -0.61 | 3.45 | ENSG00000198924 | DNA cross-link repair 1A                                      |
| PDE4D         | -0.61 | 4.74 | ENSG00000113448 | phosphodiesterase 4D                                          |
| CHML          | -0.61 | 4.18 | ENSG00000203668 | CHM like, Rab escort protein 2                                |
| ANKRD17       | -0.61 | 5.99 | ENSG00000132466 | ankyrin repeat domain 17                                      |
| KIF23         | -0.61 | 5.66 | ENSG00000137807 | kinesin family member 23                                      |
| DPH2          | -0.61 | 6.10 | ENSG00000132768 | DPH2 homolog                                                  |
| USP19         | -0.61 | 5.96 | ENSG00000172046 | ubiquitin specific peptidase 19                               |
| DBF4B         | -0.61 | 5.91 | ENSG00000161692 | DBF4 zinc finger B                                            |
| TMEM183A      | -0.61 | 3.80 | ENSG00000163444 | transmembrane protein 183A                                    |
| WDR55         | -0.61 | 5.92 | ENSG00000120314 | WD repeat domain 55                                           |
| MAGEA4        | -0.61 | 6.90 | ENSG00000147381 | MAGE family member A4                                         |
| CDK5R1        | -0.61 | 1.85 | ENSG00000176749 | cyclin dependent kinase 5 regulatory subunit 1                |
| ADM5          | -0.61 | 2.68 | ENSG00000224420 | adrenomedullin 5 (putative)                                   |
| RRP15         | -0.61 | 4.83 | ENSG00000067533 | ribosomal RNA processing 15 homolog                           |
| KLF16         | -0.61 | 6.62 | ENSG00000129911 | Kruppel like factor 16                                        |
| IRS1          | -0.61 | 4.53 | ENSG00000169047 | insulin receptor substrate 1                                  |
| NOP58         | -0.61 | 6.93 | ENSG00000055044 | NOP58 ribonucleoprotein                                       |
| RP11-364L4.1  | -0.61 | 1.04 | ENSG00000228981 | N/A                                                           |
| RP11-488C13.5 | -0.61 | 1.04 | ENSG00000258301 | N/A                                                           |
| MAPK1IP1L     | -0.61 | 6.49 | ENSG00000168175 | mitogen-activated protein kinase 1 interacting protein 1 like |
| TSPAN12       | -0.61 | 2.62 | ENSG00000106025 | tetraspanin 12                                                |
| DGCR8         | -0.61 | 5.31 | ENSG00000128191 | DGCR8, microprocessor complex subunit                         |
| LSS           | -0.61 | 7.27 | ENSG00000281289 | lanosterol synthase (2,3-oxidosqualene-lanosterol cyclase)    |
| NCL           | -0.61 | 9.17 | ENSG00000115053 | nucleolin                                                     |
| FAM189B       | -0.61 | 7.53 | ENSG00000160767 | family with sequence similarity 189 member B                  |
| TOR4A         | -0.61 | 3.49 | ENSG00000198113 | torsin family 4 member A                                      |
| MED30         | -0.61 | 2.21 | ENSG00000164758 | mediator complex subunit 30                                   |
| EPB41L4A-AS1  | -0.61 | 3.08 | ENSG00000224032 | EPB41L4A antisense RNA 1                                      |
| WDR35         | -0.61 | 3.08 | ENSG00000118965 | WD repeat domain 35                                           |

|         |       |      |                 |                                                |
|---------|-------|------|-----------------|------------------------------------------------|
| ZBTB37  | -0.61 | 3.08 | ENSG00000185278 | zinc finger and BTB domain containing 37       |
| DAGLA   | -0.61 | 3.18 | ENSG00000134780 | diacylglycerol lipase alpha                    |
| ANAPC1  | -0.61 | 3.76 | ENSG00000153107 | anaphase promoting complex subunit 1           |
| GATA3   | -0.61 | 4.06 | ENSG00000107485 | GATA binding protein 3                         |
| POLD1   | -0.61 | 6.81 | ENSG00000062822 | DNA polymerase delta 1, catalytic subunit      |
| MED14   | -0.61 | 5.57 | ENSG00000180182 | mediator complex subunit 14                    |
| PCGF6   | -0.61 | 2.65 | ENSG00000156374 | polycomb group ring finger 6                   |
| CCNK    | -0.61 | 6.36 | ENSG00000090061 | cyclin K                                       |
| GPC3    | -0.61 | 8.80 | ENSG00000147257 | glypican 3                                     |
| CEP97   | -0.61 | 1.89 | ENSG00000182504 | centrosomal protein 97                         |
| RHNO1   | -0.62 | 5.43 | ENSG00000171792 | RAD9-HUS1-RAD1 interacting nuclear orphan 1    |
| CASP3   | -0.62 | 2.73 | ENSG00000164305 | caspase 3                                      |
| NOP14   | -0.62 | 6.17 | ENSG00000087269 | NOP14 nucleolar protein                        |
| ETV3    | -0.62 | 3.56 | ENSG00000117036 | ETS variant 3                                  |
| CLK4    | -0.62 | 3.05 | ENSG00000113240 | CDC like kinase 4                              |
| ABCA8   | -0.62 | 4.14 | ENSG00000141338 | ATP binding cassette subfamily A member 8      |
| RC3H1   | -0.62 | 4.04 | ENSG00000135870 | ring finger and CCCH-type domains 1            |
| POLR2A  | -0.62 | 7.69 | ENSG00000181222 | RNA polymerase II subunit A                    |
| DDX28   | -0.62 | 3.79 | ENSG00000182810 | DEAD-box helicase 28                           |
| PITHD1  | -0.62 | 5.36 | ENSG00000057757 | PITH domain containing 1                       |
| SLC26A1 | -0.62 | 5.28 | ENSG00000145217 | solute carrier family 26 member 1              |
| TIMM44  | -0.62 | 6.26 | ENSG00000104980 | translocase of inner mitochondrial membrane 44 |
| IFRD1   | -0.62 | 5.96 | ENSG00000006652 | interferon related developmental regulator 1   |
| GATC    | -0.62 | 5.04 | ENSG00000257218 | glutamyl-tRNA amidotransferase subunit C       |
| DDX31   | -0.62 | 4.71 | ENSG00000125485 | DEAD-box helicase 31                           |
| OTUD4   | -0.62 | 3.54 | ENSG00000164164 | OTU deubiquitinase 4                           |
| TRIM4   | -0.62 | 4.31 | ENSG00000146833 | tripartite motif containing 4                  |
| ZNF583  | -0.62 | 2.15 | ENSG00000198440 | zinc finger protein 583                        |

|          |       |      |                 |                                                                  |
|----------|-------|------|-----------------|------------------------------------------------------------------|
| CENPF    | -0.62 | 5.96 | ENSG00000117724 | centromere protein F                                             |
| GNL3L    | -0.62 | 2.61 | ENSG00000130119 | G protein nucleolar 3 like                                       |
| SHC1     | -0.62 | 8.49 | ENSG00000160691 | SHC adaptor protein 1                                            |
| PNMA1    | -0.62 | 4.34 | ENSG00000176903 | paraneoplastic Ma antigen 1                                      |
| E2F5     | -0.62 | 4.71 | ENSG00000133740 | E2F transcription factor 5                                       |
| ARMCX5   | -0.62 | 3.38 | ENSG00000125962 | armadillo repeat containing, X-linked 5                          |
| ASNSD1   | -0.62 | 5.12 | ENSG00000138381 | asparagine synthetase domain containing 1                        |
| MGA      | -0.62 | 4.25 | ENSG00000174197 | MGA, MAX dimerization protein                                    |
| UBE3D    | -0.62 | 3.19 | ENSG00000118420 | ubiquitin protein ligase E3D                                     |
| L3HYPDH  | -0.62 | 2.27 | ENSG00000126790 | trans-L-3-hydroxyproline dehydratase                             |
| ABL1     | -0.62 | 5.86 | ENSG00000097007 | ABL proto-oncogene 1, non-receptor tyrosine kinase               |
| KIAA1549 | -0.62 | 5.16 | ENSG00000122778 | KIAA1549                                                         |
| MAK16    | -0.62 | 4.78 | ENSG00000198042 | MAK16 homolog                                                    |
| CCDC138  | -0.62 | 3.04 | ENSG00000163006 | coiled-coil domain containing 138                                |
| DHX30    | -0.62 | 6.74 | ENSG00000132153 | DExH-box helicase 30                                             |
| HMGN2    | -0.62 | 5.15 | ENSG00000198830 | high mobility group nucleosomal binding domain 2                 |
| SLC7A6OS | -0.62 | 2.18 | ENSG00000103061 | solute carrier family 7 member 6 opposite strand                 |
| TEF      | -0.62 | 1.82 | ENSG00000167074 | TEF, PAR bZIP transcription factor                               |
| MAGEA6   | -0.63 | 5.70 | ENSG00000197172 | MAGE family member A6                                            |
| CCNB1    | -0.63 | 7.24 | ENSG00000134057 | cyclin B1                                                        |
| UBTF     | -0.63 | 7.39 | ENSG00000108312 | upstream binding transcription factor, RNA polymerase I          |
| MED12    | -0.63 | 6.54 | ENSG00000184634 | mediator complex subunit 12                                      |
| TRPM7    | -0.63 | 4.54 | ENSG00000092439 | transient receptor potential cation channel subfamily M member 7 |
| CTCF     | -0.63 | 5.19 | ENSG00000102974 | CCCTC-binding factor                                             |
| ARL6IP6  | -0.63 | 3.47 | ENSG00000177917 | ADP ribosylation factor like GTPase 6 interacting protein 6      |
| DDX19A   | -0.63 | 5.76 | ENSG00000168872 | DEAD-box helicase 19A                                            |
| CDKN2B   | -0.63 | 1.54 | ENSG00000147883 | cyclin dependent kinase inhibitor 2B                             |
| NOMO2    | -0.63 | 3.56 | ENSG00000185164 | NODAL modulator 2                                                |

|          |       |      |                 |                                                                         |
|----------|-------|------|-----------------|-------------------------------------------------------------------------|
| WDR45B   | -0.63 | 7.49 | ENSG00000141580 | WD repeat domain 45B                                                    |
| INTS9    | -0.63 | 3.86 | ENSG00000104299 | integrator complex subunit 9                                            |
| WDR90    | -0.63 | 4.40 | ENSG00000161996 | WD repeat domain 90                                                     |
| ZNF131   | -0.63 | 3.76 | ENSG00000172262 | zinc finger protein 131                                                 |
| MESDC1   | -0.63 | 6.26 | ENSG00000140406 | mesoderm development candidate 1                                        |
| FAN1     | -0.63 | 2.89 | ENSG00000276787 | FANCD2/FANCI-associated<br>nuclease 1                                   |
| SFSWAP   | -0.63 | 5.94 | ENSG00000061936 | splicing factor SWAP homolog                                            |
| FKBP11   | -0.63 | 5.98 | ENSG00000134285 | FK506 binding protein 11                                                |
| CHCHD2P2 | -0.63 | 2.33 | ENSG00000275346 | coiled-coil-helix-coiled-coil-helix<br>domain containing 2 pseudogene 2 |
| SART3    | -0.63 | 6.07 | ENSG00000075856 | squamous cell carcinoma antigen<br>recognized by T-cells 3              |
| FAM103A1 | -0.63 | 2.76 | ENSG00000169612 | family with sequence similarity 103<br>member A1                        |
| NFX1     | -0.63 | 5.15 | ENSG00000086102 | nuclear transcription factor, X-box<br>binding 1                        |
| PTBP1    | -0.63 | 8.96 | ENSG00000011304 | polypyrimidine tract binding protein<br>1                               |
| SPRED2   | -0.63 | 5.58 | ENSG00000198369 | sprouty related EVH1 domain<br>containing 2                             |
| SMAD1    | -0.63 | 1.39 | ENSG00000170365 | SMAD family member 1                                                    |
| SORD     | -0.63 | 3.64 | ENSG00000140263 | sorbitol dehydrogenase                                                  |
| R3HDM1   | -0.63 | 6.16 | ENSG00000048991 | R3H domain containing 1                                                 |
| DOPEY1   | -0.63 | 2.46 | ENSG00000083097 | dopey family member 1                                                   |
| SNX27    | -0.63 | 5.90 | ENSG00000143376 | sorting nexin family member 27                                          |
| INCENP   | -0.64 | 5.32 | ENSG00000149503 | inner centromere protein                                                |
| PURA     | -0.64 | 2.72 | ENSG00000185129 | purine rich element binding protein A                                   |
| TGS1     | -0.64 | 4.73 | ENSG00000137574 | trimethylguanosine synthase 1                                           |
| RELL2    | -0.64 | 4.91 | ENSG00000164620 | RELT like 2                                                             |
| STAM     | -0.64 | 4.46 | ENSG00000136738 | signal transducing adaptor molecule                                     |
| IRAK1    | -0.64 | 8.60 | ENSG00000184216 | interleukin 1 receptor associated<br>kinase 1                           |
| AGO2     | -0.64 | 5.09 | ENSG00000123908 | argonaute 2, RISC catalytic<br>component                                |
| EXO1     | -0.64 | 4.93 | ENSG00000174371 | exonuclease 1                                                           |
| LRRC14   | -0.64 | 5.00 | ENSG00000160959 | leucine rich repeat containing 14                                       |

|              |       |      |                 |                                                 |
|--------------|-------|------|-----------------|-------------------------------------------------|
| ZIC5         | -0.64 | 4.82 | ENSG00000139800 | Zic family member 5                             |
| C12orf73     | -0.64 | 3.69 | ENSG00000204954 | chromosome 12 open reading frame<br>73          |
| ARHGEF11     | -0.64 | 6.33 | ENSG00000132694 | Rho guanine nucleotide exchange<br>factor 11    |
| USP36        | -0.64 | 6.15 | ENSG00000055483 | ubiquitin specific peptidase 36                 |
| RBMXL1       | -0.64 | 4.28 | ENSG00000213516 | RNA binding motif protein, X-linked<br>like 1   |
| HS6ST1       | -0.64 | 3.84 | ENSG00000136720 | heparan sulfate 6-O-sulfotransferase<br>1       |
| PATZ1        | -0.64 | 5.16 | ENSG00000100105 | POZ/BTB and AT hook containing<br>zinc finger 1 |
| RP11-116D2.1 | -0.64 | 4.48 | ENSG00000261012 | N/A                                             |
| IDH3A        | -0.64 | 3.98 | ENSG00000166411 | isocitrate dehydrogenase 3 (NAD(+))<br>alpha    |
| RNF34        | -0.64 | 5.65 | ENSG00000170633 | ring finger protein 34                          |
| VHL          | -0.64 | 4.05 | ENSG00000134086 | von Hippel-Lindau tumor suppressor              |
| U2AF2        | -0.64 | 8.27 | ENSG00000063244 | U2 small nuclear RNA auxiliary<br>factor 2      |
| ABHD16A      | -0.64 | 1.45 | ENSG00000230475 | abhydrolase domain containing 16A               |
| GIT2         | -0.64 | 4.03 | ENSG00000139436 | GIT ArfGAP 2                                    |
| ZXDC         | -0.64 | 4.12 | ENSG00000070476 | ZXD family zinc finger C                        |
| HNF1B        | -0.64 | 6.06 | ENSG00000275410 | HNF1 homeobox B                                 |
| ZNF263       | -0.64 | 5.30 | ENSG00000006194 | zinc finger protein 263                         |
| PGS1         | -0.64 | 4.52 | ENSG00000087157 | phosphatidylglycerophosphate<br>synthase 1      |
| FBXO31       | -0.64 | 5.60 | ENSG00000283277 | F-box protein 31                                |
| DOHH         | -0.64 | 4.81 | ENSG00000129932 | deoxyhypusine<br>hydroxylase/monooxygenase      |
| IGSF3        | -0.64 | 5.19 | ENSG00000143061 | immunoglobulin superfamily<br>member 3          |
| RNF31        | -0.64 | 4.25 | ENSG00000092098 | ring finger protein 31                          |
| CTSV         | -0.64 | 4.55 | ENSG00000136943 | cathepsin V                                     |
| MPC1         | -0.64 | 5.43 | ENSG00000060762 | mitochondrial pyruvate carrier 1                |
| MAP2K3       | -0.64 | 6.79 | ENSG00000034152 | mitogen-activated protein kinase<br>kinase 3    |
| AMER1        | -0.64 | 3.76 | ENSG00000184675 | APC membrane recruitment protein<br>1           |

|                |       |      |                 |                                                                  |
|----------------|-------|------|-----------------|------------------------------------------------------------------|
| SBNO1          | -0.64 | 4.69 | ENSG00000139697 | strawberry notch homolog 1                                       |
| KDM2B          | -0.64 | 5.10 | ENSG00000089094 | lysine demethylase 2B                                            |
| PIK3R1         | -0.65 | 2.34 | ENSG00000145675 | phosphoinositide-3-kinase regulatory subunit 1                   |
| RP11-196G18.22 | -0.65 | 2.11 | ENSG00000261716 | N/A                                                              |
| NAT10          | -0.65 | 6.33 | ENSG00000135372 | N-acetyltransferase 10                                           |
| GRWD1          | -0.65 | 6.78 | ENSG00000105447 | glutamate rich WD repeat containing 1                            |
| POU4F1         | -0.65 | 1.84 | ENSG00000152192 | POU class 4 homeobox 1                                           |
| ESCO2          | -0.65 | 2.95 | ENSG00000171320 | establishment of sister chromatid cohesion N-acetyltransferase 2 |
| AC004980.7     | -0.65 | 1.68 | ENSG00000205485 | N/A                                                              |
| LINC00641      | -0.65 | 1.68 | ENSG00000258441 | long intergenic non-protein coding RNA 641                       |
| ATXN2L         | -0.65 | 8.34 | ENSG00000168488 | ataxin 2 like                                                    |
| WDR3           | -0.65 | 5.03 | ENSG00000065183 | WD repeat domain 3                                               |
| CSTF2T         | -0.65 | 4.37 | ENSG00000177613 | cleavage stimulation factor subunit 2 tau variant                |
| HHEX           | -0.65 | 5.70 | ENSG00000152804 | hematopoietically expressed homeobox                             |
| POLG           | -0.65 | 5.15 | ENSG00000140521 | DNA polymerase gamma, catalytic subunit                          |
| SORBS2         | -0.65 | 1.30 | ENSG00000154556 | sorbin and SH3 domain containing 2                               |
| ZNF229         | -0.65 | 1.30 | ENSG00000278318 | zinc finger protein 229                                          |
| TOM1L1         | -0.65 | 5.06 | ENSG00000141198 | target of myb1 like 1 membrane trafficking protein               |
| RP13-270P17.2  | -0.65 | 2.36 | ENSG00000265399 | N/A                                                              |
| PCDH9          | -0.65 | 2.14 | ENSG00000184226 | protocadherin 9                                                  |
| SPTLC1         | -0.65 | 4.16 | ENSG00000090054 | serine palmitoyltransferase long chain base subunit 1            |
| PRMT6          | -0.65 | 4.64 | ENSG00000198890 | protein arginine methyltransferase 6                             |
| PKMYT1         | -0.65 | 5.59 | ENSG00000127564 | protein kinase, membrane associated tyrosine/threonine 1         |
| RBM38          | -0.65 | 5.61 | ENSG00000132819 | RNA binding motif protein 38                                     |
| RNF123         | -0.65 | 4.56 | ENSG00000164068 | ring finger protein 123                                          |
| UPF2           | -0.65 | 5.17 | ENSG00000151461 | UPF2 regulator of nonsense transcripts homolog (yeast)           |

|          |       |      |                 |                                                                         |
|----------|-------|------|-----------------|-------------------------------------------------------------------------|
| RPRD2    | -0.65 | 5.41 | ENSG00000163125 | regulation of nuclear pre-mRNA domain containing 2                      |
| NOL6     | -0.65 | 7.06 | ENSG00000165271 | nucleolar protein 6                                                     |
| ST3GAL4  | -0.65 | 6.37 | ENSG00000110080 | ST3 beta-galactoside alpha-2,3-sialyltransferase 4                      |
| ELMSAN1  | -0.65 | 3.59 | ENSG00000156030 | ELM2 and Myb/SANT domain containing 1                                   |
| HAUS6    | -0.66 | 3.15 | ENSG00000147874 | HAUS augmin like complex subunit 6                                      |
| FBXO43   | -0.66 | 2.05 | ENSG00000156509 | F-box protein 43                                                        |
| TOE1     | -0.66 | 4.32 | ENSG00000132773 | target of EGR1, member 1 (nuclear)                                      |
| PEX12    | -0.66 | 2.79 | ENSG00000108733 | peroxisomal biogenesis factor 12                                        |
| DDX55    | -0.66 | 5.07 | ENSG00000111364 | DEAD-box helicase 55                                                    |
| NDRG2    | -0.66 | 5.32 | ENSG00000165795 | NDRG family member 2                                                    |
| OTUD1    | -0.66 | 2.32 | ENSG00000165312 | OTU deubiquitinase 1                                                    |
| ATP11A   | -0.66 | 5.02 | ENSG00000068650 | ATPase phospholipid transporting 11A                                    |
| RABGEF1  | -0.66 | 1.77 | ENSG00000154710 | RAB guanine nucleotide exchange factor 1                                |
| ACTRT3   | -0.66 | 1.13 | ENSG00000184378 | actin related protein T3                                                |
| RFC5     | -0.66 | 5.21 | ENSG00000111445 | replication factor C subunit 5                                          |
| MYO18A   | -0.66 | 6.36 | ENSG00000196535 | myosin XVIII A                                                          |
| MAFG     | -0.66 | 5.69 | ENSG00000197063 | MAF bZIP transcription factor G                                         |
| HNRNPU   | -0.66 | 8.38 | ENSG00000153187 | heterogeneous nuclear ribonucleoprotein U                               |
| AASDHPPT | -0.66 | 4.61 | ENSG00000149313 | aminoadipate-semialdehyde dehydrogenase-phosphopantetheinyl transferase |
| PDS5B    | -0.66 | 4.14 | ENSG00000083642 | PDS5 cohesin associated factor B                                        |
| EIF4G1   | -0.66 | 9.42 | ENSG00000114867 | eukaryotic translation initiation factor 4 gamma 1                      |
| ZNF180   | -0.66 | 2.08 | ENSG00000167384 | zinc finger protein 180                                                 |
| MCM4     | -0.66 | 6.50 | ENSG00000104738 | minichromosome maintenance complex component 4                          |
| FUS      | -0.66 | 7.73 | ENSG00000089280 | FUS RNA binding protein                                                 |
| CHDH     | -0.66 | 3.73 | ENSG00000016391 | choline dehydrogenase                                                   |
| ZBTB1    | -0.66 | 2.57 | ENSG00000126804 | zinc finger and BTB domain containing 1                                 |

|               |       |      |                 |                                                                   |
|---------------|-------|------|-----------------|-------------------------------------------------------------------|
| ABCC2         | -0.66 | 8.06 | ENSG00000023839 | ATP binding cassette subfamily C member 2                         |
| CDK14         | -0.66 | 3.60 | ENSG00000058091 | cyclin dependent kinase 14                                        |
| BRD1          | -0.66 | 3.21 | ENSG00000100425 | bromodomain containing 1                                          |
| CLP1          | -0.66 | 4.35 | ENSG00000172409 | cleavage and polyadenylation factor I subunit 1                   |
| KLF5          | -0.66 | 4.87 | ENSG00000102554 | Kruppel like factor 5                                             |
| SHROOM1       | -0.66 | 4.93 | ENSG00000164403 | shroom family member 1                                            |
| ATF4          | -0.66 | 8.66 | ENSG00000128272 | activating transcription factor 4                                 |
| UBN1          | -0.67 | 5.58 | ENSG00000118900 | ubiquitin 1                                                       |
| PI4KAP2       | -0.67 | 2.50 | ENSG00000183506 | phosphatidylinositol 4-kinase alpha pseudogene 2                  |
| QSOX2         | -0.67 | 5.61 | ENSG00000165661 | quiescin sulfhydryl oxidase 2                                     |
| CARD9         | -0.67 | 1.20 | ENSG00000187796 | caspase recruitment domain family member 9                        |
| CTD-2201E18.3 | -0.67 | 1.20 | ENSG00000177738 | N/A                                                               |
| MBD1          | -0.67 | 5.48 | ENSG00000141644 | methyl-CpG binding domain protein 1                               |
| BRCC3         | -0.67 | 4.10 | ENSG00000185515 | BRCA1/BRCA2-containing complex subunit 3                          |
| RNF24         | -0.67 | 4.20 | ENSG00000101236 | ring finger protein 24                                            |
| SALL4         | -0.67 | 3.99 | ENSG00000101115 | spalt like transcription factor 4                                 |
| RPS2P46       | -0.67 | 2.15 | ENSG00000189343 | ribosomal protein S2 pseudogene 46                                |
| PDXDC2P       | -0.67 | 1.85 | ENSG00000196696 | pyridoxal dependent decarboxylase domain containing 2, pseudogene |
| STARD7        | -0.67 | 7.15 | ENSG00000084090 | StAR related lipid transfer domain containing 7                   |
| MAU2          | -0.67 | 7.10 | ENSG00000129933 | MAU2 sister chromatid cohesion factor                             |
| UPF1          | -0.67 | 7.63 | ENSG00000005007 | UPF1, RNA helicase and ATPase                                     |
| AIM1          | -0.67 | 1.47 | ENSG00000112297 | absent in melanoma 1                                              |
| MANEAL        | -0.67 | 5.28 | ENSG00000185090 | mannosidase endo-alpha like                                       |
| MTDH          | -0.67 | 6.35 | ENSG00000147649 | metadherin                                                        |
| MAGEA12       | -0.67 | 6.29 | ENSG00000213401 | MAGE family member A12                                            |
| PCBP1         | -0.67 | 7.87 | ENSG00000169564 | poly(rC) binding protein 1                                        |
| VAV2          | -0.67 | 5.39 | ENSG00000160293 | vav guanine nucleotide exchange factor 2                          |



|         |       |      |                 |                                                                      |
|---------|-------|------|-----------------|----------------------------------------------------------------------|
| PABPC1  | -0.67 | 9.23 | ENSG00000070756 | poly(A) binding protein cytoplasmic 1                                |
| ACBD5   | -0.67 | 5.29 | ENSG00000107897 | acyl-CoA binding domain containing 5                                 |
| SUGP2   | -0.67 | 6.53 | ENSG00000064607 | SURP and G-patch domain containing 2                                 |
| CCDC97  | -0.67 | 6.20 | ENSG00000142039 | coiled-coil domain containing 97                                     |
| RNF44   | -0.67 | 6.58 | ENSG00000146083 | ring finger protein 44                                               |
| SLPI    | -0.67 | 5.61 | ENSG00000124107 | secretory leukocyte peptidase inhibitor                              |
| CPT2    | -0.67 | 3.65 | ENSG00000157184 | carnitine palmitoyltransferase 2                                     |
| SMAP1   | -0.67 | 2.95 | ENSG00000112305 | small ArfGAP 1                                                       |
| RBM15B  | -0.67 | 6.46 | ENSG00000259956 | RNA binding motif protein 15B                                        |
| NOTCH1  | -0.68 | 3.90 | ENSG00000148400 | notch 1                                                              |
| ELK1    | -0.68 | 6.40 | ENSG00000126767 | ELK1, ETS transcription factor                                       |
| MYO19   | -0.68 | 6.86 | ENSG00000278259 | myosin XIX                                                           |
| EEF1DP1 | -0.68 | 1.74 | ENSG00000228887 | eukaryotic translation elongation factor 1 delta pseudogene 1        |
| PLK1    | -0.68 | 7.16 | ENSG00000166851 | polo like kinase 1                                                   |
| WDR37   | -0.68 | 3.40 | ENSG00000047056 | WD repeat domain 37                                                  |
| CCZ1    | -0.68 | 3.13 | ENSG00000122674 | CCZ1 homolog, vacuolar protein trafficking and biogenesis associated |
| CCNE1   | -0.68 | 4.99 | ENSG00000105173 | cyclin E1                                                            |
| DHX35   | -0.68 | 3.88 | ENSG00000101452 | DEAH-box helicase 35                                                 |
| DYNC1H1 | -0.68 | 8.24 | ENSG00000197102 | dynein cytoplasmic 1 heavy chain 1                                   |
| PDHX    | -0.68 | 5.27 | ENSG00000110435 | pyruvate dehydrogenase complex component X                           |
| ESRRA   | -0.68 | 5.92 | ENSG00000173153 | estrogen related receptor alpha                                      |
| HMG5    | -0.68 | 3.81 | ENSG00000198157 | high mobility group nucleosome binding domain 5                      |
| USP42   | -0.68 | 4.03 | ENSG00000106346 | ubiquitin specific peptidase 42                                      |
| NEFH    | -0.68 | 4.71 | ENSG00000100285 | neurofilament heavy polypeptide                                      |
| KAT5    | -0.68 | 4.66 | ENSG00000172977 | lysine acetyltransferase 5                                           |
| STIL    | -0.68 | 3.32 | ENSG00000123473 | SCL/TAL1 interrupting locus                                          |
| ZNF544  | -0.68 | 3.32 | ENSG00000198131 | zinc finger protein 544                                              |
| ERCC3   | -0.68 | 6.01 | ENSG00000163161 | ERCC excision repair 3, TFIIH core complex helicase subunit          |

|              |       |      |                 |                                                                         |
|--------------|-------|------|-----------------|-------------------------------------------------------------------------|
| ADH4         | -0.68 | 2.67 | ENSG00000198099 | alcohol dehydrogenase 4 (class II), pi polypeptide                      |
| PPRC1        | -0.68 | 7.20 | ENSG00000148840 | peroxisome proliferator-activated receptor gamma, coactivator-related 1 |
| NOL8         | -0.69 | 4.64 | ENSG00000198000 | nucleolar protein 8                                                     |
| AUNIP        | -0.69 | 3.48 | ENSG00000127423 | aurora kinase A and ninein interacting protein                          |
| ACVR1B       | -0.69 | 5.99 | ENSG00000135503 | activin A receptor type 1B                                              |
| CLUH         | -0.69 | 8.10 | ENSG00000132361 | clustered mitochondria homolog                                          |
| SLC7A5       | -0.69 | 8.75 | ENSG00000103257 | solute carrier family 7 member 5                                        |
| FTLP2        | -0.69 | 2.69 | ENSG00000232368 | ferritin light chain pseudogene 2                                       |
| PIIP5K2      | -0.69 | 3.62 | ENSG00000145725 | diphosphoinositol pentakisphosphate kinase 2                            |
| CPEB1        | -0.69 | 1.09 | ENSG00000277445 | cytoplasmic polyadenylation element binding protein 1                   |
| RP11-114H7.3 | -0.69 | 1.09 | ENSG00000248955 | N/A                                                                     |
| ZNF17        | -0.69 | 1.09 | ENSG00000186272 | zinc finger protein 17                                                  |
| ZNF585B      | -0.69 | 2.19 | ENSG00000245680 | zinc finger protein 585B                                                |
| IGF2BP3      | -0.69 | 3.09 | ENSG00000136231 | insulin like growth factor 2 mRNA binding protein 3                     |
| ZNF222       | -0.69 | 1.86 | ENSG00000159885 | zinc finger protein 222                                                 |
| SLC25A30     | -0.69 | 2.92 | ENSG00000174032 | solute carrier family 25 member 30                                      |
| RASA1        | -0.69 | 3.26 | ENSG00000145715 | RAS p21 protein activator 1                                             |
| TTLL12       | -0.69 | 7.27 | ENSG00000100304 | tubulin tyrosine ligase like 12                                         |
| TCEB3        | -0.69 | 6.46 | ENSG00000011007 | transcription elongation factor B subunit 3                             |
| CDR2L        | -0.69 | 6.72 | ENSG00000109089 | cerebellar degeneration related protein 2 like                          |
| TYMS         | -0.69 | 5.71 | ENSG00000176890 | thymidylate synthetase                                                  |
| CHMP1B       | -0.69 | 5.26 | ENSG00000255112 | charged multivesicular body protein 1B                                  |
| RHOF         | -0.69 | 3.92 | ENSG00000139725 | ras homolog family member F, filopodia associated                       |
| KIAA1522     | -0.69 | 7.03 | ENSG00000162522 | KIAA1522                                                                |
| ZNRF3        | -0.69 | 5.05 | ENSG00000183579 | zinc and ring finger 3                                                  |
| PPM1D        | -0.69 | 2.94 | ENSG00000170836 | protein phosphatase, Mg <sup>2+</sup> /Mn <sup>2+</sup> dependent 1D    |

|         |       |       |                 |                                                         |
|---------|-------|-------|-----------------|---------------------------------------------------------|
| MRPS26  | -0.69 | 6.29  | ENSG00000125901 | mitochondrial ribosomal protein S26                     |
| BCDIN3D | -0.69 | 2.07  | ENSG00000186666 | BCDIN3 domain containing RNA methyltransferase          |
| EXO5    | -0.69 | 2.07  | ENSG00000164002 | exonuclease 5                                           |
| RNPC3   | -0.69 | 2.07  | ENSG00000185946 | RNA binding region (RNP1, RRM) containing 3             |
| MIS18A  | -0.69 | 4.27  | ENSG00000159055 | MIS18 kinetochore protein A                             |
| MYCBP2  | -0.69 | 3.84  | ENSG00000005810 | MYC binding protein 2, E3 ubiquitin protein ligase      |
| EXOSC6  | -0.69 | 3.79  | ENSG00000223496 | exosome component 6                                     |
| MDC1    | -0.69 | 6.67  | ENSG00000228575 | mediator of DNA damage checkpoint 1                     |
| ZNF236  | -0.69 | 2.39  | ENSG00000130856 | zinc finger protein 236                                 |
| SNAPC4  | -0.69 | 5.47  | ENSG00000165684 | small nuclear RNA activating complex polypeptide 4      |
| NLGN4X  | -0.69 | 4.25  | ENSG00000146938 | neuroligin 4, X-linked                                  |
| DGKD    | -0.70 | 4.00  | ENSG00000280873 | diacylglycerol kinase delta                             |
| CHAMP1  | -0.70 | 4.63  | ENSG00000198824 | chromosome alignment maintaining phosphoprotein 1       |
| STAG1   | -0.70 | 3.23  | ENSG00000118007 | stromal antigen 1                                       |
| ZNF587B | -0.70 | 3.52  | ENSG00000269343 | zinc finger protein 587B                                |
| PCNT    | -0.70 | 5.95  | ENSG00000160299 | pericentrin                                             |
| TICRR   | -0.70 | 4.91  | ENSG00000140534 | TOPBP1 interacting checkpoint and replication regulator |
| HELLS   | -0.70 | 4.19  | ENSG00000119969 | helicase, lymphoid-specific                             |
| CEBPD   | -0.70 | 4.99  | ENSG00000221869 | CCAAT/enhancer binding protein delta                    |
| ZNF296  | -0.70 | 4.82  | ENSG00000170684 | zinc finger protein 296                                 |
| RFX5    | -0.70 | 5.49  | ENSG00000143390 | regulatory factor X5                                    |
| NUP35   | -0.70 | 4.43  | ENSG00000163002 | nucleoporin 35                                          |
| FOXD3   | -0.70 | 1.48  | ENSG00000187140 | forkhead box D3                                         |
| PDIA4   | -0.70 | 8.79  | ENSG00000155660 | protein disulfide isomerase family A member 4           |
| INO80   | -0.70 | 5.34  | ENSG00000128908 | INO80 complex subunit                                   |
| HSPA8   | -0.70 | 10.43 | ENSG00000109971 | heat shock protein family A (Hsp70) member 8            |

|            |       |      |                 |                                                        |
|------------|-------|------|-----------------|--------------------------------------------------------|
| TIMM10B    | -0.70 | 4.26 | ENSG00000132286 | translocase of inner mitochondrial membrane 10B        |
| YRDC       | -0.70 | 4.55 | ENSG00000196449 | yrnC N6-threonylcarbamoyltransferase domain containing |
| PAX9       | -0.70 | 1.75 | ENSG00000198807 | paired box 9                                           |
| TTC32      | -0.70 | 1.75 | ENSG00000183891 | tetratricopeptide repeat domain 32                     |
| NEK8       | -0.70 | 2.31 | ENSG00000160602 | NIMA related kinase 8                                  |
| MRPL38     | -0.70 | 2.84 | ENSG00000204316 | mitochondrial ribosomal protein L38                    |
| CEBPA      | -0.70 | 6.86 | ENSG00000245848 | CCAAT/enhancer binding protein alpha                   |
| SBDSP1     | -0.70 | 3.58 | ENSG00000225648 | Shwachman-Bodian-Diamond syndrome pseudogene 1         |
| FBXL19     | -0.70 | 5.90 | ENSG00000099364 | F-box and leucine rich repeat protein 19               |
| CRIPAK     | -0.70 | 4.12 | ENSG00000179979 | cysteine rich PAK1 inhibitor                           |
| CDC25A     | -0.70 | 5.16 | ENSG00000164045 | cell division cycle 25A                                |
| ZC3H7A     | -0.70 | 3.71 | ENSG00000122299 | zinc finger CCCH-type containing 7A                    |
| MRPL49     | -0.70 | 6.33 | ENSG00000149792 | mitochondrial ribosomal protein L49                    |
| DNAJA3     | -0.70 | 6.89 | ENSG00000276726 | DnaJ heat shock protein family (Hsp40) member A3       |
| CEBPB      | -0.70 | 7.44 | ENSG00000172216 | CCAAT/enhancer binding protein beta                    |
| ZNF384     | -0.70 | 5.93 | ENSG00000126746 | zinc finger protein 384                                |
| GPATCH4    | -0.70 | 6.44 | ENSG00000160818 | G-patch domain containing 4                            |
| AC006273.5 | -0.70 | 2.01 | ENSG00000267530 | N/A                                                    |
| PILRB      | -0.70 | 2.01 | ENSG00000121716 | paired immunoglobulin-like type 2 receptor beta        |
| CXorf56    | -0.71 | 3.68 | ENSG00000018610 | chromosome X open reading frame 56                     |
| PHF5A      | -0.71 | 5.49 | ENSG00000100410 | PHD finger protein 5A                                  |
| CHEK1      | -0.71 | 5.72 | ENSG00000149554 | checkpoint kinase 1                                    |
| ZZEF1      | -0.71 | 5.11 | ENSG00000074755 | zinc finger ZZ-type and EF-hand domain containing 1    |
| RPL7L1     | -0.71 | 6.04 | ENSG00000146223 | ribosomal protein L7 like 1                            |
| LDB1       | -0.71 | 5.86 | ENSG00000198728 | LIM domain binding 1                                   |
| KIF15      | -0.71 | 2.78 | ENSG00000280610 | kinesin family member 15                               |

|             |       |      |                 |                                                                                |
|-------------|-------|------|-----------------|--------------------------------------------------------------------------------|
| RAI1        | -0.71 | 4.31 | ENSG00000108557 | retinoic acid induced 1                                                        |
| AKAP17A     | -0.71 | 6.33 | ENSG00000197976 | A-kinase anchoring protein 17A                                                 |
| FBXL6       | -0.71 | 5.30 | ENSG00000182325 | F-box and leucine rich repeat protein<br>6                                     |
| TRUB1       | -0.71 | 3.59 | ENSG00000165832 | TruB pseudouridine synthase family<br>member 1                                 |
| TICAM1      | -0.71 | 5.76 | ENSG00000127666 | toll like receptor adaptor molecule 1                                          |
| TUBA1C      | -0.71 | 7.02 | ENSG00000167553 | tubulin alpha 1c                                                               |
| NFRKB       | -0.71 | 5.77 | ENSG00000170322 | nuclear factor related to kappaB<br>binding protein                            |
| AGAP1       | -0.71 | 4.34 | ENSG00000157985 | ArfGAP with GTPase domain,<br>ankyrin repeat and PH domain 1                   |
| RCAN1       | -0.71 | 5.40 | ENSG00000159200 | regulator of calcineurin 1                                                     |
| AC074117.10 | -0.71 | 3.75 | ENSG00000234072 | N/A                                                                            |
| ATP1B3      | -0.71 | 6.38 | ENSG00000069849 | ATPase Na <sup>+</sup> /K <sup>+</sup> transporting subunit<br>beta 3          |
| DNA2        | -0.71 | 3.06 | ENSG00000138346 | DNA replication helicase/nuclease 2                                            |
| ISG20L2     | -0.71 | 6.14 | ENSG00000143319 | interferon stimulated exonuclease<br>gene 20 like 2                            |
| ORC6        | -0.71 | 3.50 | ENSG00000091651 | origin recognition complex subunit 6                                           |
| PGAM5       | -0.71 | 7.07 | ENSG00000247077 | PGAM family member 5,<br>mitochondrial serine/threonine<br>protein phosphatase |
| KANSL1      | -0.71 | 4.81 | ENSG00000120071 | KAT8 regulatory NSL complex<br>subunit 1                                       |
| DLG5        | -0.71 | 4.35 | ENSG00000151208 | discs large MAGUK scaffold protein<br>5                                        |
| SGTB        | -0.72 | 2.99 | ENSG00000197860 | small glutamine rich tetratricopeptide<br>repeat containing beta               |
| RRP12       | -0.72 | 7.23 | ENSG00000052749 | ribosomal RNA processing 12<br>homolog                                         |
| RAP2B       | -0.72 | 4.68 | ENSG00000181467 | RAP2B, member of RAS oncogene<br>family                                        |
| NR1I3       | -0.72 | 1.39 | ENSG00000143257 | nuclear receptor subfamily 1 group I<br>member 3                               |
| GATAD2A     | -0.72 | 6.77 | ENSG00000167491 | GATA zinc finger domain containing<br>2A                                       |

|            |       |      |                 |                                                        |
|------------|-------|------|-----------------|--------------------------------------------------------|
| C1orf131   | -0.72 | 3.94 | ENSG00000143633 | chromosome 1 open reading frame 131                    |
| GIN3       | -0.72 | 4.16 | ENSG00000181938 | GIN3 complex subunit 3                                 |
| ABCE1      | -0.72 | 5.87 | ENSG00000164163 | ATP binding cassette subfamily E member 1              |
| HIC2       | -0.72 | 5.09 | ENSG00000169635 | HIC ZBTB transcriptional repressor 2                   |
| TAF2       | -0.72 | 4.22 | ENSG00000064313 | TATA-box binding protein associated factor 2           |
| DDX20      | -0.72 | 2.92 | ENSG00000064703 | DEAD-box helicase 20                                   |
| PEG10      | -0.72 | 7.88 | ENSG00000242265 | paternally expressed 10                                |
| POLR1A     | -0.72 | 7.06 | ENSG00000068654 | RNA polymerase I subunit A                             |
| SHMT2      | -0.72 | 7.85 | ENSG00000182199 | serine hydroxymethyltransferase 2                      |
| POGK       | -0.72 | 6.05 | ENSG00000143157 | pogo transposable element with KRAB domain             |
| CDK12      | -0.72 | 5.70 | ENSG00000167258 | cyclin dependent kinase 12                             |
| SLC52A3    | -0.72 | 1.99 | ENSG00000101276 | solute carrier family 52 member 3                      |
| DHX38      | -0.72 | 5.73 | ENSG00000140829 | DEAH-box helicase 38                                   |
| SLX4       | -0.72 | 4.21 | ENSG00000188827 | SLX4 structure-specific endonuclease subunit           |
| C2orf48    | -0.72 | 1.45 | ENSG00000163009 | chromosome 2 open reading frame 48                     |
| MTPAP      | -0.72 | 4.40 | ENSG00000107951 | mitochondrial poly(A) polymerase                       |
| MPP6       | -0.72 | 3.96 | ENSG00000105926 | membrane palmitoylated protein 6                       |
| JUNB       | -0.72 | 6.47 | ENSG00000171223 | JunB proto-oncogene, AP-1 transcription factor subunit |
| E2F8       | -0.72 | 2.58 | ENSG00000129173 | E2F transcription factor 8                             |
| PRMT5      | -0.73 | 6.03 | ENSG00000100462 | protein arginine methyltransferase 5                   |
| ACAT2      | -0.73 | 6.17 | ENSG00000120437 | acetyl-CoA acetyltransferase 2                         |
| RAPGEF6    | -0.73 | 1.81 | ENSG00000158987 | Rap guanine nucleotide exchange factor 6               |
| ZNF674-AS1 | -0.73 | 2.06 | ENSG00000230844 | ZNF674 antisense RNA 1 (head to head)                  |
| ZNF354A    | -0.73 | 2.27 | ENSG00000169131 | zinc finger protein 354A                               |
| RBM14      | -0.73 | 7.24 | ENSG00000239306 | RNA binding motif protein 14                           |
| MUS81      | -0.73 | 5.97 | ENSG00000172732 | MUS81 structure-specific endonuclease subunit          |

|                |       |      |                 |                                                                     |
|----------------|-------|------|-----------------|---------------------------------------------------------------------|
| GAN            | -0.73 | 3.44 | ENSG00000261609 | gigaxonin                                                           |
| ZXDB           | -0.73 | 2.80 | ENSG00000198455 | zinc finger, X-linked, duplicated B                                 |
| USP22          | -0.73 | 6.46 | ENSG00000124422 | ubiquitin specific peptidase 22                                     |
| PSMA6          | -0.73 | 3.07 | ENSG00000100902 | proteasome subunit alpha 6                                          |
| RP11-566K19.6  | -0.73 | 1.17 | ENSG00000274253 | N/A                                                                 |
| DNAJC14        | -0.73 | 3.30 | ENSG00000135392 | DnaJ heat shock protein family<br>(Hsp40) member C14                |
| RNF4           | -0.73 | 6.55 | ENSG00000063978 | ring finger protein 4                                               |
| KIFC1          | -0.73 | 6.24 | ENSG00000237649 | kinesin family member C1                                            |
| HPD            | -0.73 | 4.82 | ENSG00000158104 | 4-hydroxyphenylpyruvate<br>dioxygenase                              |
| WDR81          | -0.73 | 5.80 | ENSG00000167716 | WD repeat domain 81                                                 |
| ZC3H18         | -0.73 | 6.43 | ENSG00000158545 | zinc finger CCCH-type containing<br>18                              |
| CNNM4          | -0.73 | 4.32 | ENSG00000158158 | cyclin and CBS domain divalent<br>metal cation transport mediator 4 |
| TMEM5          | -0.73 | 4.38 | ENSG00000118600 | transmembrane protein 5                                             |
| WNT3           | -0.73 | 4.12 | ENSG00000277626 | Wnt family member 3                                                 |
| KCTD10         | -0.74 | 5.50 | ENSG00000110906 | potassium channel tetramerization<br>domain containing 10           |
| RP11-1246C19.1 | -0.74 | 2.39 | ENSG00000273230 | N/A                                                                 |
| ZBED6CL        | -0.74 | 3.94 | ENSG00000188707 | ZBED6 C-terminal like                                               |
| SLC10A4        | -0.74 | 4.13 | ENSG00000145248 | solute carrier family 10 member 4                                   |
| BRSK2          | -0.74 | 5.17 | ENSG00000174672 | BR serine/threonine kinase 2                                        |
| NNMT           | -0.74 | 7.33 | ENSG00000166741 | nicotinamide N-methyltransferase                                    |
| SEC24D         | -0.74 | 4.73 | ENSG00000150961 | SEC24 homolog D, COPII coat<br>complex component                    |
| NUDT4          | -0.74 | 2.66 | ENSG00000173598 | nudix hydrolase 4                                                   |
| TRRAP          | -0.74 | 6.12 | ENSG00000196367 | transformation/transcription domain<br>associated protein           |
| LARP1          | -0.74 | 8.49 | ENSG00000155506 | La ribonucleoprotein domain family<br>member 1                      |
| OTUD3          | -0.74 | 3.36 | ENSG00000169914 | OTU deubiquitinase 3                                                |
| FANCM          | -0.74 | 2.28 | ENSG00000187790 | Fanconi anemia complementation<br>group M                           |
| ZBTB2          | -0.74 | 4.05 | ENSG00000181472 | zinc finger and BTB domain<br>containing 2                          |

|           |       |      |                 |                                                                     |
|-----------|-------|------|-----------------|---------------------------------------------------------------------|
| MAGEA3    | -0.74 | 6.03 | ENSG00000221867 | MAGE family member A3                                               |
| DNAJC2    | -0.74 | 5.66 | ENSG00000105821 | DnaJ heat shock protein family (Hsp40) member C2                    |
| UVSSA     | -0.74 | 3.69 | ENSG00000163945 | UV stimulated scaffold protein A                                    |
| FAM200A   | -0.75 | 2.07 | ENSG00000221909 | family with sequence similarity 200 member A                        |
| ZNF124    | -0.75 | 2.07 | ENSG00000196418 | zinc finger protein 124                                             |
| DHX9      | -0.75 | 6.83 | ENSG00000135829 | DExH-box helicase 9                                                 |
| PIP5K1A   | -0.75 | 5.52 | ENSG00000143398 | phosphatidylinositol-4-phosphate 5-kinase type 1 alpha              |
| PIGO      | -0.75 | 6.37 | ENSG00000165282 | phosphatidylinositol glycan anchor biosynthesis class O             |
| ZYG11A    | -0.75 | 2.75 | ENSG00000203995 | zyg-11 family member A, cell cycle regulator                        |
| GK5       | -0.75 | 2.11 | ENSG00000175066 | glycerol kinase 5 (putative)                                        |
| CEBPZ     | -0.75 | 4.63 | ENSG00000115816 | CCAAT/enhancer binding protein zeta                                 |
| TRMT44    | -0.75 | 4.12 | ENSG00000155275 | tRNA methyltransferase 44 homolog ( <i>S. cerevisiae</i> )          |
| NPC1      | -0.75 | 6.21 | ENSG00000141458 | NPC intracellular cholesterol transporter 1                         |
| ARID1B    | -0.75 | 5.01 | ENSG00000049618 | AT-rich interaction domain 1B                                       |
| MCM9      | -0.75 | 2.37 | ENSG00000111877 | minichromosome maintenance 9 homologous recombination repair factor |
| ACLY      | -0.75 | 7.65 | ENSG00000131473 | ATP citrate lyase                                                   |
| SNRNP200  | -0.75 | 8.16 | ENSG00000144028 | small nuclear ribonucleoprotein U5 subunit 200                      |
| SALL1     | -0.75 | 4.10 | ENSG00000103449 | spalt like transcription factor 1                                   |
| ZNF407    | -0.75 | 2.81 | ENSG00000215421 | zinc finger protein 407                                             |
| ESPL1     | -0.75 | 6.48 | ENSG00000135476 | extra spindle pole bodies like 1, separase                          |
| PCBP1-AS1 | -0.75 | 3.72 | ENSG00000179818 | PCBP1 antisense RNA 1                                               |
| PDF       | -0.75 | 3.02 | ENSG00000258429 | peptide deformylase (mitochondrial)                                 |
| RBM12B    | -0.75 | 2.67 | ENSG00000183808 | RNA binding motif protein 12B                                       |
| TGFBRAP1  | -0.75 | 4.91 | ENSG00000135966 | transforming growth factor beta receptor associated protein 1       |
| GSE1      | -0.75 | 5.50 | ENSG00000131149 | Gse1 coiled-coil protein                                            |



|          |       |      |                 |                                                                                         |
|----------|-------|------|-----------------|-----------------------------------------------------------------------------------------|
| BRPF1    | -0.75 | 4.09 | ENSG00000156983 | bromodomain and PHD finger containing 1                                                 |
| PDCD7    | -0.75 | 4.10 | ENSG00000090470 | programmed cell death 7                                                                 |
| SF1      | -0.76 | 8.82 | ENSG00000168066 | splicing factor 1                                                                       |
| MGAT5B   | -0.76 | 1.94 | ENSG00000167889 | mannosyl (alpha-1,6-)-glycoprotein beta-1,6-N-acetyl-glucosaminyltransferase, isozyme B |
| PIGW     | -0.76 | 2.50 | ENSG00000275600 | phosphatidylinositol glycan anchor biosynthesis class W                                 |
| MTBP     | -0.76 | 2.26 | ENSG00000172167 | MDM2 binding protein                                                                    |
| DDX12P   | -0.76 | 2.53 | ENSG00000214826 | DEAD/H-box helicase 12, pseudogene                                                      |
| PTMAP4   | -0.76 | 1.98 | ENSG00000231503 | prothymosin, alpha pseudogene 4                                                         |
| KLF15    | -0.76 | 4.71 | ENSG00000163884 | Kruppel like factor 15                                                                  |
| MSL3     | -0.76 | 4.92 | ENSG00000005302 | male-specific lethal 3 homolog (Drosophila)                                             |
| DBR1     | -0.76 | 2.55 | ENSG00000138231 | debranching RNA lariats 1                                                               |
| ZBTB39   | -0.76 | 3.54 | ENSG00000166860 | zinc finger and BTB domain containing 39                                                |
| FAM111B  | -0.76 | 4.19 | ENSG00000189057 | family with sequence similarity 111 member B                                            |
| PAK1IP1  | -0.76 | 5.67 | ENSG00000111845 | PAK1 interacting protein 1                                                              |
| ZBTB14   | -0.76 | 3.32 | ENSG00000198081 | zinc finger and BTB domain containing 14                                                |
| ZNF777   | -0.76 | 5.03 | ENSG00000196453 | zinc finger protein 777                                                                 |
| CBX4     | -0.76 | 6.49 | ENSG00000141582 | chromobox 4                                                                             |
| UPF3B    | -0.76 | 4.58 | ENSG00000125351 | UPF3 regulator of nonsense transcripts homolog B (yeast)                                |
| C16orf58 | -0.76 | 4.86 | ENSG00000140688 | chromosome 16 open reading frame 58                                                     |
| SMG8     | -0.76 | 3.83 | ENSG00000167447 | SMG8, nonsense mediated mRNA decay factor                                               |
| HEATR1   | -0.76 | 5.92 | ENSG00000119285 | HEAT repeat containing 1                                                                |
| MYBBP1A  | -0.76 | 7.73 | ENSG00000132382 | MYB binding protein 1a                                                                  |
| LIMS1    | -0.76 | 4.83 | ENSG00000169756 | LIM zinc finger domain containing 1                                                     |
| WBP11    | -0.76 | 6.87 | ENSG00000084463 | WW domain binding protein 11                                                            |
| ENTPD7   | -0.76 | 3.75 | ENSG00000198018 | ectonucleoside triphosphate diphosphohydrolase 7                                        |

|                |       |      |                 |                                                                  |
|----------------|-------|------|-----------------|------------------------------------------------------------------|
| PPP1R8         | -0.76 | 5.25 | ENSG00000117751 | protein phosphatase 1 regulatory subunit 8                       |
| AURKA          | -0.76 | 7.88 | ENSG00000087586 | aurora kinase A                                                  |
| CELF1          | -0.77 | 4.30 | ENSG00000149187 | CUGBP, Elav-like family member 1                                 |
| NGRN           | -0.77 | 5.14 | ENSG00000182768 | neugrin, neurite outgrowth associated                            |
| HK2            | -0.77 | 2.15 | ENSG00000159399 | hexokinase 2                                                     |
| NUP153         | -0.77 | 5.75 | ENSG00000124789 | nucleoporin 153                                                  |
| FAM53B         | -0.77 | 6.49 | ENSG00000189319 | family with sequence similarity 53 member B                      |
| MORN1          | -0.77 | 2.94 | ENSG00000116151 | MORN repeat containing 1                                         |
| MCM10          | -0.77 | 5.49 | ENSG00000065328 | minichromosome maintenance 10 replication initiation factor      |
| RP5-1112D6.8   | -0.77 | 1.79 | ENSG00000272356 | N/A                                                              |
| VCAM1          | -0.77 | 2.74 | ENSG00000162692 | vascular cell adhesion molecule 1                                |
| NOB1           | -0.77 | 5.31 | ENSG00000141101 | NIN1/PSMD8 binding protein 1 homolog                             |
| NVL            | -0.77 | 3.97 | ENSG00000143748 | nuclear VCP-like                                                 |
| FUBP1          | -0.77 | 6.23 | ENSG00000162613 | far upstream element binding protein 1                           |
| TCF19          | -0.77 | 5.24 | ENSG00000224379 | transcription factor 19                                          |
| C9orf40        | -0.77 | 3.76 | ENSG00000135045 | chromosome 9 open reading frame 40                               |
| CNOT4          | -0.77 | 3.98 | ENSG00000080802 | CCR4-NOT transcription complex subunit 4                         |
| RRP1B          | -0.77 | 6.51 | ENSG00000160208 | ribosomal RNA processing 1B                                      |
| RRN3P3         | -0.77 | 1.91 | ENSG00000257122 | RRN3 homolog, RNA polymerase I transcription factor pseudogene 3 |
| SIK2           | -0.77 | 7.20 | ENSG00000170145 | salt inducible kinase 2                                          |
| RDH16          | -0.77 | 2.33 | ENSG00000139547 | retinol dehydrogenase 16 (all-trans)                             |
| PSPC1          | -0.78 | 4.36 | ENSG00000121390 | paraspeckle component 1                                          |
| OIP5           | -0.78 | 3.31 | ENSG00000104147 | Opa interacting protein 5                                        |
| PRIM2          | -0.78 | 2.66 | ENSG00000146143 | primase (DNA) subunit 2                                          |
| RP11-1020A11.2 | -0.78 | 1.43 | ENSG00000269982 | N/A                                                              |
| RAB8A          | -0.78 | 5.58 | ENSG00000167461 | RAB8A, member RAS oncogene family                                |

|          |       |      |                 |                                                             |
|----------|-------|------|-----------------|-------------------------------------------------------------|
| RABEP1   | -0.78 | 4.40 | ENSG00000029725 | rabaptin, RAB GTPase binding effector protein 1             |
| MTFP1    | -0.78 | 2.68 | ENSG00000242114 | mitochondrial fission process 1                             |
| LCMT2    | -0.78 | 3.67 | ENSG00000168806 | leucine carboxyl methyltransferase 2                        |
| GORAB    | -0.78 | 2.96 | ENSG00000120370 | golgin, RAB6 interacting                                    |
| MNX1     | -0.78 | 4.16 | ENSG00000130675 | motor neuron and pancreas homeobox 1                        |
| IRF2BPL  | -0.78 | 4.80 | ENSG00000119669 | interferon regulatory factor 2 binding protein like         |
| POLR1B   | -0.78 | 5.64 | ENSG00000125630 | RNA polymerase I subunit B                                  |
| URB2     | -0.78 | 4.31 | ENSG00000135763 | URB2 ribosome biogenesis 2 homolog ( <i>S. cerevisiae</i> ) |
| CDC42EP1 | -0.78 | 9.23 | ENSG00000128283 | CDC42 effector protein 1                                    |
| FBXL18   | -0.78 | 3.08 | ENSG00000155034 | F-box and leucine rich repeat protein 18                    |
| TIGD5    | -0.78 | 4.90 | ENSG00000179886 | tigger transposable element derived 5                       |
| NOL11    | -0.78 | 5.34 | ENSG00000130935 | nucleolar protein 11                                        |
| UAP1L1   | -0.79 | 3.89 | ENSG00000197355 | UDP-N-acetylglucosamine pyrophosphorylase 1 like 1          |
| SKA3     | -0.79 | 4.59 | ENSG00000165480 | spindle and kinetochore associated complex subunit 3        |
| FAM173B  | -0.79 | 2.67 | ENSG00000150756 | family with sequence similarity 173 member B                |
| LYAR     | -0.79 | 5.75 | ENSG00000145220 | Lyl antibody reactive                                       |
| FANCE    | -0.79 | 4.46 | ENSG00000112039 | Fanconi anemia complementation group E                      |
| NAF1     | -0.79 | 3.84 | ENSG00000145414 | nuclear assembly factor 1 ribonucleoprotein                 |
| POLR3E   | -0.79 | 5.65 | ENSG00000058600 | RNA polymerase III subunit E                                |
| FAM20C   | -0.79 | 5.39 | ENSG00000177706 | FAM20C, golgi associated secretory pathway kinase           |
| NELFA    | -0.79 | 5.93 | ENSG00000185049 | negative elongation factor complex member A                 |
| ISOC1    | -0.79 | 4.68 | ENSG00000066583 | isochorismatase domain containing 1                         |
| TERT     | -0.79 | 4.12 | ENSG00000164362 | telomerase reverse transcriptase                            |
| EAF1     | -0.79 | 3.63 | ENSG00000144597 | ELL associated factor 1                                     |
| TFB2M    | -0.80 | 4.59 | ENSG00000162851 | transcription factor B2, mitochondrial                      |

|               |       |      |                 |                                                         |
|---------------|-------|------|-----------------|---------------------------------------------------------|
| ZNF778        | -0.80 | 2.00 | ENSG00000170100 | zinc finger protein 778                                 |
| GLDC          | -0.80 | 5.36 | ENSG00000178445 | glycine decarboxylase                                   |
| UCHL5         | -0.80 | 5.76 | ENSG00000116750 | ubiquitin C-terminal hydrolase L5                       |
| RNF138        | -0.80 | 3.01 | ENSG00000134758 | ring finger protein 138                                 |
| HMOX1         | -0.80 | 8.65 | ENSG00000100292 | heme oxygenase 1                                        |
| CEP72         | -0.80 | 3.63 | ENSG00000112877 | centrosomal protein 72                                  |
| SFPQ          | -0.80 | 7.76 | ENSG00000116560 | splicing factor proline and glutamine rich              |
| GORASP1       | -0.80 | 5.50 | ENSG00000114745 | golgi reassembly stacking protein 1                     |
| LINC00680     | -0.80 | 2.35 | ENSG00000215190 | long intergenic non-protein coding RNA 680              |
| ONECUT1       | -0.80 | 4.09 | ENSG00000169856 | one cut homeobox 1                                      |
| KDM3B         | -0.80 | 5.17 | ENSG00000120733 | lysine demethylase 3B                                   |
| FOXD2         | -0.81 | 2.38 | ENSG00000186564 | forkhead box D2                                         |
| CACNB2        | -0.81 | 4.13 | ENSG00000165995 | calcium voltage-gated channel auxiliary subunit beta 2  |
| AC093724.2    | -0.81 | 1.60 | ENSG00000281848 | N/A                                                     |
| ZNF746        | -0.81 | 4.51 | ENSG00000181220 | zinc finger protein 746                                 |
| BMP2K         | -0.81 | 1.69 | ENSG00000138756 | BMP2 inducible kinase                                   |
| IBA57         | -0.81 | 3.18 | ENSG00000181873 | IBA57 homolog, iron-sulfur cluster assembly             |
| SCAF4         | -0.81 | 6.33 | ENSG00000156304 | SR-related CTD associated factor 4                      |
| CLDN1         | -0.81 | 9.23 | ENSG00000163347 | claudin 1                                               |
| PTPN1         | -0.81 | 5.08 | ENSG00000196396 | protein tyrosine phosphatase, non-receptor type 1       |
| PFAS          | -0.81 | 5.84 | ENSG00000178921 | phosphoribosylformylglycinamide synthase                |
| YBX1          | -0.81 | 8.26 | ENSG00000065978 | Y-box binding protein 1                                 |
| NARS2         | -0.81 | 4.32 | ENSG00000137513 | asparaginyl-tRNA synthetase 2, mitochondrial (putative) |
| WDR76         | -0.81 | 4.32 | ENSG00000092470 | WD repeat domain 76                                     |
| SSTR2         | -0.81 | 2.81 | ENSG00000180616 | somatostatin receptor 2                                 |
| RP11-443B20.1 | -0.81 | 3.36 | ENSG00000271936 | N/A                                                     |
| SETD1A        | -0.81 | 6.30 | ENSG00000099381 | SET domain containing 1A                                |
| HS3ST3B1      | -0.82 | 4.21 | ENSG00000125430 | heparan sulfate-glucosamine 3-sulfotransferase 3B1      |
| KMT2D         | -0.82 | 6.23 | ENSG00000167548 | lysine methyltransferase 2D                             |

|                |       |      |                 |                                                                |
|----------------|-------|------|-----------------|----------------------------------------------------------------|
| TTLL11         | -0.82 | 2.15 | ENSG00000175764 | tubulin tyrosine ligase like 11                                |
| RNF169         | -0.82 | 2.21 | ENSG00000166439 | ring finger protein 169                                        |
| PID1           | -0.82 | 3.12 | ENSG00000153823 | phosphotyrosine interaction domain containing 1                |
| SLC35E2B       | -0.82 | 3.71 | ENSG00000189339 | solute carrier family 35 member E2B                            |
| BCOR           | -0.82 | 4.49 | ENSG00000183337 | BCL6 corepressor                                               |
| MAZ            | -0.82 | 5.93 | ENSG00000103495 | MYC associated zinc finger protein                             |
| ZNF274         | -0.82 | 4.02 | ENSG00000171606 | zinc finger protein 274                                        |
| TONSL          | -0.82 | 6.90 | ENSG00000160949 | tonsoku-like, DNA repair protein                               |
| AKAP1          | -0.82 | 6.30 | ENSG00000121057 | A-kinase anchoring protein 1                                   |
| PER3           | -0.82 | 2.59 | ENSG00000049246 | period circadian clock 3                                       |
| EIF3A          | -0.82 | 7.25 | ENSG00000107581 | eukaryotic translation initiation factor 3 subunit A           |
| AFG3L1P        | -0.82 | 3.64 | ENSG00000223959 | AFG3 like matrix AAA peptidase subunit 1, pseudogene           |
| NSMAF          | -0.82 | 3.64 | ENSG00000035681 | neutral sphingomyelinase activation associated factor          |
| HIVEP1         | -0.82 | 2.75 | ENSG00000095951 | human immunodeficiency virus type I enhancer binding protein 1 |
| MAT2A          | -0.82 | 7.28 | ENSG00000168906 | methionine adenosyltransferase 2A                              |
| FAT1           | -0.83 | 6.17 | ENSG00000083857 | FAT atypical cadherin 1                                        |
| MROH6          | -0.83 | 3.95 | ENSG00000277781 | maestro heat like repeat family member 6                       |
| EP300          | -0.83 | 4.86 | ENSG00000100393 | E1A binding protein p300                                       |
| MAFF           | -0.83 | 5.01 | ENSG00000185022 | MAF bZIP transcription factor F                                |
| MAP3K14        | -0.83 | 5.20 | ENSG00000006062 | mitogen-activated protein kinase kinase kinase 14              |
| SETD2          | -0.83 | 5.28 | ENSG00000181555 | SET domain containing 2                                        |
| CASP9          | -0.83 | 4.86 | ENSG00000132906 | caspase 9                                                      |
| MTX1P1         | -0.83 | 1.11 | ENSG00000263037 | metaxin 1 pseudogene 1                                         |
| SPDL1          | -0.83 | 4.47 | ENSG00000040275 | spindle apparatus coiled-coil protein 1                        |
| RTEL1-TNFRSF6B | -0.83 | 1.30 | ENSG00000026036 | RTEL1-TNFRSF6B readthrough (NMD candidate)                     |
| EFCAB7         | -0.83 | 1.91 | ENSG00000203965 | EF-hand calcium binding domain 7                               |
| RP11-332H14.2  | -0.83 | 1.99 | ENSG00000272994 | N/A                                                            |

|              |       |      |                 |                                                                     |
|--------------|-------|------|-----------------|---------------------------------------------------------------------|
| MARK2        | -0.83 | 5.39 | ENSG00000072518 | microtubule affinity regulating kinase 2                            |
| MRGPRF       | -0.83 | 2.19 | ENSG00000172935 | MAS related GPR family member F                                     |
| NUFIP1       | -0.83 | 2.37 | ENSG00000083635 | NUFIP1, FMR1 interacting protein 1                                  |
| MCM8         | -0.83 | 3.64 | ENSG00000125885 | minichromosome maintenance 8 homologous recombination repair factor |
| TGIF2        | -0.84 | 5.53 | ENSG00000118707 | TGFB induced factor homeobox 2                                      |
| BAG3         | -0.84 | 6.23 | ENSG00000151929 | BCL2 associated athanogene 3                                        |
| BRPF3        | -0.84 | 4.77 | ENSG00000096070 | bromodomain and PHD finger containing 3                             |
| BAHD1        | -0.84 | 4.69 | ENSG00000140320 | bromo adjacent homology domain containing 1                         |
| SRCAP        | -0.84 | 6.89 | ENSG00000080603 | Snf2 related CREBBP activator protein                               |
| TOMM40L      | -0.84 | 5.43 | ENSG00000158882 | translocase of outer mitochondrial membrane 40 like                 |
| FDPS         | -0.84 | 6.81 | ENSG00000160752 | farnesyl diphosphate synthase                                       |
| LMNB1        | -0.84 | 4.72 | ENSG00000113368 | lamin B1                                                            |
| APC          | -0.84 | 3.12 | ENSG00000134982 | APC, WNT signaling pathway regulator                                |
| NCOA6        | -0.84 | 5.21 | ENSG00000198646 | nuclear receptor coactivator 6                                      |
| FOXE1        | -0.84 | 4.18 | ENSG00000178919 | forkhead box E1                                                     |
| TUBA1B       | -0.84 | 6.84 | ENSG00000123416 | tubulin alpha 1b                                                    |
| SRGAP3       | -0.84 | 2.85 | ENSG00000196220 | SLIT-ROBO Rho GTPase activating protein 3                           |
| NR2F2        | -0.84 | 5.50 | ENSG00000185551 | nuclear receptor subfamily 2 group F member 2                       |
| MINA         | -0.84 | 3.86 | ENSG00000170854 | MYC induced nuclear antigen                                         |
| TOP1         | -0.85 | 5.10 | ENSG00000198900 | topoisomerase (DNA) I                                               |
| ZCCHC8       | -0.85 | 4.59 | ENSG00000033030 | zinc finger CCHC-type containing 8                                  |
| FAM222A      | -0.85 | 5.74 | ENSG00000139438 | family with sequence similarity 222 member A                        |
| RAB35        | -0.85 | 6.54 | ENSG00000111737 | RAB35, member RAS oncogene family                                   |
| RP11-253E3.3 | -0.85 | 1.89 | ENSG00000250899 | N/A                                                                 |
| GLTSCR1      | -0.85 | 5.19 | ENSG00000063169 | glioma tumor suppressor candidate region gene 1                     |

|               |       |       |                 |                                                               |
|---------------|-------|-------|-----------------|---------------------------------------------------------------|
| HEXIM1        | -0.86 | 6.82  | ENSG00000186834 | hexamethylene bisacetamide inducible 1                        |
| CASP8AP2      | -0.86 | 2.77  | ENSG00000118412 | caspase 8 associated protein 2                                |
| GSG2          | -0.86 | 2.77  | ENSG00000177602 | germ cell associated 2, haspin                                |
| NDOR1         | -0.86 | 5.46  | ENSG00000283590 | NADPH dependent diflavin oxidoreductase 1                     |
| PPID          | -0.86 | 5.20  | ENSG00000171497 | peptidylprolyl isomerase D                                    |
| ZNF765        | -0.86 | 1.63  | ENSG00000196417 | zinc finger protein 765                                       |
| RP11-64K7.1   | -0.86 | 1.58  | ENSG00000240854 | N/A                                                           |
| TMPO-AS1      | -0.86 | 3.63  | ENSG00000257167 | TMPO antisense RNA 1                                          |
| ZNF786        | -0.86 | 2.57  | ENSG00000197362 | zinc finger protein 786                                       |
| FBXL14        | -0.86 | 3.49  | ENSG00000171823 | F-box and leucine rich repeat protein 14                      |
| NR4A3         | -0.86 | 2.36  | ENSG00000119508 | nuclear receptor subfamily 4 group A member 3                 |
| CTD-2589H19.6 | -0.86 | 1.32  | ENSG00000271781 | N/A                                                           |
| PGAM1         | -0.86 | 4.91  | ENSG00000171314 | phosphoglycerate mutase 1                                     |
| MPHOSPH10     | -0.86 | 4.78  | ENSG00000124383 | M-phase phosphoprotein 10                                     |
| RP11-1148L6.5 | -0.87 | 1.19  | ENSG00000228343 | N/A                                                           |
| APCDD1        | -0.87 | 1.13  | ENSG00000154856 | APC down-regulated 1                                          |
| XPC           | -0.87 | 4.17  | ENSG00000154767 | XPC complex subunit, DNA damage recognition and repair factor |
| QRICH2        | -0.87 | 3.14  | ENSG00000129646 | glutamine rich 2                                              |
| PTMA          | -0.87 | 7.43  | ENSG00000187514 | prothymosin, alpha                                            |
| SQSTM1        | -0.87 | 10.38 | ENSG00000161011 | sequestosome 1                                                |
| MIR22HG       | -0.87 | 3.65  | ENSG00000282800 | MIR22 host gene                                               |
| ARID1A        | -0.87 | 5.96  | ENSG00000117713 | AT-rich interaction domain 1A                                 |
| HNRNPF        | -0.87 | 6.58  | ENSG00000169813 | heterogeneous nuclear ribonucleoprotein F                     |
| LINC00342     | -0.87 | 1.90  | ENSG00000232931 | long intergenic non-protein coding RNA 342                    |
| ACO2          | -0.87 | 6.20  | ENSG00000100412 | aconitase 2                                                   |
| RPS6KB1       | -0.88 | 3.86  | ENSG00000108443 | ribosomal protein S6 kinase B1                                |
| F11           | -0.88 | 2.37  | ENSG00000088926 | coagulation factor XI                                         |
| UBE2O         | -0.88 | 5.69  | ENSG00000175931 | ubiquitin conjugating enzyme E2 O                             |
| PNN           | -0.88 | 6.17  | ENSG00000100941 | pinin, desmosome associated protein                           |
| GLUD2         | -0.88 | 4.15  | ENSG00000182890 | glutamate dehydrogenase 2                                     |

|               |       |       |                 |                                                        |
|---------------|-------|-------|-----------------|--------------------------------------------------------|
| STX11         | -0.88 | 3.63  | ENSG00000135604 | syntaxin 11                                            |
| TFDP1         | -0.88 | 6.31  | ENSG00000198176 | transcription factor Dp-1                              |
| ZNF830        | -0.88 | 3.55  | ENSG00000198783 | zinc finger protein 830                                |
| NSRP1         | -0.89 | 4.00  | ENSG00000126653 | nuclear speckle splicing regulatory protein 1          |
| SETD1B        | -0.89 | 5.38  | ENSG00000139718 | SET domain containing 1B                               |
| UTP14A        | -0.89 | 6.05  | ENSG00000156697 | UTP14A small subunit processome component              |
| LARS2         | -0.89 | 4.48  | ENSG0000011376  | leucyl-tRNA synthetase 2, mitochondrial                |
| NEB           | -0.89 | 4.90  | ENSG00000183091 | nebulin                                                |
| ZC3H7B        | -0.89 | 5.42  | ENSG00000100403 | zinc finger CCCH-type containing 7B                    |
| KIAA1524      | -0.89 | 4.17  | ENSG00000163507 | KIAA1524                                               |
| LRIG3         | -0.89 | 3.33  | ENSG00000139263 | leucine rich repeats and immunoglobulin like domains 3 |
| ZNF512B       | -0.89 | 5.65  | ENSG00000196700 | zinc finger protein 512B                               |
| DNAJC9        | -0.90 | 3.07  | ENSG00000213551 | DnaJ heat shock protein family (Hsp40) member C9       |
| KHSRP         | -0.90 | 8.17  | ENSG00000088247 | KH-type splicing regulatory protein                    |
| POLE3         | -0.90 | 5.99  | ENSG00000148229 | DNA polymerase epsilon 3, accessory subunit            |
| REEP4         | -0.90 | 6.36  | ENSG00000168476 | receptor accessory protein 4                           |
| GLE1          | -0.90 | 4.57  | ENSG00000119392 | GLE1, RNA export mediator                              |
| BASP1         | -0.90 | 5.49  | ENSG00000176788 | brain abundant membrane attached signal protein 1      |
| RP11-521B24.3 | -0.90 | 1.75  | ENSG00000251602 | N/A                                                    |
| IRAK2         | -0.91 | 4.38  | ENSG00000134070 | interleukin 1 receptor associated kinase 2             |
| DDX21         | -0.91 | 6.24  | ENSG00000165732 | DExD-box helicase 21                                   |
| HCFC1         | -0.91 | 7.70  | ENSG00000172534 | host cell factor C1                                    |
| PDPK1         | -0.91 | 2.85  | ENSG00000140992 | 3-phosphoinositide dependent protein kinase 1          |
| ODC1          | -0.91 | 10.33 | ENSG00000115758 | ornithine decarboxylase 1                              |
| APOA1         | -0.91 | 8.62  | ENSG00000118137 | apolipoprotein A1                                      |
| FOXC1         | -0.91 | 3.59  | ENSG00000054598 | forkhead box C1                                        |



|              |       |       |                 |                                                       |
|--------------|-------|-------|-----------------|-------------------------------------------------------|
| ESRP2        | -0.91 | 6.09  | ENSG00000103067 | epithelial splicing regulatory protein 2              |
| MED17        | -0.91 | 4.08  | ENSG00000042429 | mediator complex subunit 17                           |
| NOLC1        | -0.91 | 7.60  | ENSG00000166197 | nucleolar and coiled-body phosphoprotein 1            |
| NSUN2        | -0.91 | 5.82  | ENSG00000037474 | NOP2/Sun RNA methyltransferase family member 2        |
| CPSF6        | -0.91 | 6.30  | ENSG00000111605 | cleavage and polyadenylation specific factor 6        |
| RP11-384K6.6 | -0.91 | 1.56  | ENSG00000260404 | N/A                                                   |
| PHYH         | -0.91 | 6.40  | ENSG00000107537 | phytanoyl-CoA 2-hydroxylase                           |
| GNPNAT1      | -0.91 | 5.52  | ENSG00000100522 | glucosamine-phosphate N-acetyltransferase 1           |
| KMT2B        | -0.91 | 6.83  | ENSG00000272333 | lysine methyltransferase 2B                           |
| KCTD5        | -0.91 | 4.76  | ENSG00000167977 | potassium channel tetramerization domain containing 5 |
| ACOX2        | -0.91 | 5.60  | ENSG00000168306 | acyl-CoA oxidase 2                                    |
| TOB2         | -0.91 | 4.88  | ENSG00000183864 | transducer of ERBB2, 2                                |
| HDAC4        | -0.91 | 3.20  | ENSG00000068024 | histone deacetylase 4                                 |
| MYO5B        | -0.92 | 1.88  | ENSG00000167306 | myosin VB                                             |
| HMCN1        | -0.92 | 1.46  | ENSG00000143341 | hemicentin 1                                          |
| CDCA8        | -0.92 | 5.31  | ENSG00000134690 | cell division cycle associated 8                      |
| COL5A3       | -0.92 | 4.06  | ENSG00000080573 | collagen type V alpha 3 chain                         |
| CCNJ         | -0.92 | 3.14  | ENSG00000107443 | cyclin J                                              |
| MCM2         | -0.92 | 6.37  | ENSG00000073111 | minichromosome maintenance complex component 2        |
| MAFK         | -0.92 | 6.40  | ENSG00000198517 | MAF bZIP transcription factor K                       |
| C14orf169    | -0.92 | 4.27  | ENSG00000170468 | chromosome 14 open reading frame 169                  |
| TET3         | -0.92 | 3.98  | ENSG00000187605 | tet methylcytosine dioxygenase 3                      |
| MAPK7        | -0.92 | 4.63  | ENSG00000166484 | mitogen-activated protein kinase 7                    |
| POP1         | -0.92 | 4.30  | ENSG00000104356 | POP1 homolog, ribonuclease P/MRP subunit              |
| SPRY2        | -0.93 | 1.72  | ENSG00000136158 | sprouty RTK signaling antagonist 2                    |
| EEF2         | -0.93 | 11.15 | ENSG00000167658 | eukaryotic translation elongation factor 2            |
| PRPF4        | -0.93 | 5.68  | ENSG00000136875 | pre-mRNA processing factor 4                          |

|             |       |      |                 |                                                                                                 |
|-------------|-------|------|-----------------|-------------------------------------------------------------------------------------------------|
| SMCR8       | -0.93 | 1.29 | ENSG00000176994 | Smith-Magenis syndrome chromosome region, candidate 8                                           |
| SRRM1       | -0.93 | 5.26 | ENSG00000133226 | serine and arginine repetitive matrix 1                                                         |
| DIS3L       | -0.93 | 4.68 | ENSG00000166938 | DIS3 like exosome 3'-5' exoribonuclease                                                         |
| WHAMM       | -0.93 | 4.15 | ENSG00000156232 | WAS protein homolog associated with actin, golgi membranes and microtubules                     |
| SMARCC2     | -0.93 | 6.35 | ENSG00000139613 | SWI/SNF related, matrix associated, actin dependent regulator of chromatin subfamily c member 2 |
| YOD1        | -0.93 | 3.40 | ENSG00000180667 | YOD1 deubiquitinase                                                                             |
| ZNF319      | -0.93 | 3.65 | ENSG00000166188 | zinc finger protein 319                                                                         |
| ZBTB12      | -0.94 | 2.57 | ENSG00000204366 | zinc finger and BTB domain containing 12                                                        |
| CDHR3       | -0.94 | 2.16 | ENSG00000128536 | cadherin related family member 3                                                                |
| RCC1        | -0.94 | 6.60 | ENSG00000180198 | regulator of chromosome condensation 1                                                          |
| PAXIP1      | -0.94 | 3.72 | ENSG00000157212 | PAX interacting protein 1                                                                       |
| FAM83D      | -0.94 | 5.42 | ENSG00000101447 | family with sequence similarity 83 member D                                                     |
| LHX2        | -0.94 | 4.79 | ENSG00000106689 | LIM homeobox 2                                                                                  |
| EI24P2      | -0.94 | 1.53 | ENSG00000236257 | EI24, autophagy associated transmembrane protein pseudogene 2                                   |
| RP11-47A8.5 | -0.94 | 2.09 | ENSG00000272933 | N/A                                                                                             |
| LONRF3      | -0.94 | 3.79 | ENSG00000175556 | LON peptidase N-terminal domain and ring finger 3                                               |
| ALPL        | -0.94 | 2.06 | ENSG00000162551 | alkaline phosphatase, liver/bone/kidney                                                         |
| DUSP7       | -0.94 | 4.25 | ENSG00000164086 | dual specificity phosphatase 7                                                                  |
| ZNF276      | -0.95 | 3.74 | ENSG00000158805 | zinc finger protein 276                                                                         |
| FBXL19-AS1  | -0.95 | 1.04 | ENSG00000260852 | FBXL19 antisense RNA 1 (head to head)                                                           |
| DBH-AS1     | -0.95 | 2.85 | ENSG00000225756 | DBH antisense RNA 1                                                                             |
| UTP20       | -0.95 | 5.09 | ENSG00000120800 | UTP20, small subunit processome component                                                       |
| HLF         | -0.95 | 4.88 | ENSG00000108924 | HLF, PAR bZIP transcription factor                                                              |

|               |       |      |                 |                                                               |
|---------------|-------|------|-----------------|---------------------------------------------------------------|
| SPHK2         | -0.95 | 5.16 | ENSG00000063176 | sphingosine kinase 2                                          |
| FOXA1         | -0.95 | 4.26 | ENSG00000129514 | forkhead box A1                                               |
| TGDS          | -0.95 | 2.94 | ENSG00000088451 | TDP-glucose 4,6-dehydratase                                   |
| FAM13B        | -0.95 | 2.81 | ENSG00000031003 | family with sequence similarity 13 member B                   |
| IFRD2         | -0.95 | 6.50 | ENSG00000214706 | interferon related developmental regulator 2                  |
| B3GNT9        | -0.95 | 2.13 | ENSG00000237172 | UDP-GlcNAc:betaGal beta-1,3-N-acetylglucosaminyltransferase 9 |
| CCSAP         | -0.95 | 3.70 | ENSG00000154429 | centriole, cilia and spindle associated protein               |
| GPS2          | -0.96 | 3.11 | ENSG00000132522 | G protein pathway suppressor 2                                |
| ICAM1         | -0.96 | 7.58 | ENSG00000090339 | intercellular adhesion molecule 1                             |
| KLF2          | -0.96 | 2.98 | ENSG00000127528 | Kruppel like factor 2                                         |
| STK35         | -0.96 | 5.02 | ENSG00000125834 | serine/threonine kinase 35                                    |
| SLC7A11       | -0.96 | 4.35 | ENSG00000151012 | solute carrier family 7 member 11                             |
| DFFB          | -0.96 | 2.45 | ENSG00000169598 | DNA fragmentation factor subunit beta                         |
| PRMT3         | -0.96 | 3.89 | ENSG00000185238 | protein arginine methyltransferase 3                          |
| DNMT3B        | -0.96 | 5.15 | ENSG00000088305 | DNA methyltransferase 3 beta                                  |
| PCF11         | -0.96 | 3.56 | ENSG00000165494 | PCF11 cleavage and polyadenylation factor subunit             |
| FASTKD5       | -0.96 | 4.47 | ENSG00000215251 | FAST kinase domains 5                                         |
| EIF3C         | -0.96 | 1.25 | ENSG00000184110 | eukaryotic translation initiation factor 3 subunit C          |
| CLSPN         | -0.96 | 3.30 | ENSG00000092853 | claspin                                                       |
| OSGIN1        | -0.97 | 7.33 | ENSG00000140961 | oxidative stress induced growth inhibitor 1                   |
| RRS1          | -0.97 | 6.58 | ENSG00000179041 | ribosome biogenesis regulator homolog                         |
| MRPS24        | -0.97 | 2.74 | ENSG00000062582 | mitochondrial ribosomal protein S24                           |
| MKRN4P        | -0.97 | 1.50 | ENSG00000238222 | makorin ring finger protein 4, pseudogene                     |
| BSCL2         | -0.97 | 1.70 | ENSG00000168000 | BSCL2, seipin lipid droplet biogenesis associated             |
| PSMC3IP       | -0.97 | 3.26 | ENSG00000131470 | PSMC3 interacting protein                                     |
| RP11-274B21.4 | -0.98 | 1.13 | ENSG00000230715 | N/A                                                           |

|         |       |      |                 |                                                          |
|---------|-------|------|-----------------|----------------------------------------------------------|
| BRCA2   | -0.98 | 2.54 | ENSG00000139618 | BRCA2, DNA repair associated                             |
| POM121C | -0.98 | 3.97 | ENSG00000272391 | POM121 transmembrane nucleoporin C                       |
| PDSS1   | -0.98 | 3.91 | ENSG00000148459 | prenyl (decaprenyl) diphosphate synthase, subunit 1      |
| KLF13   | -0.98 | 6.24 | ENSG00000275746 | Kruppel like factor 13                                   |
| DNMT1   | -0.98 | 6.60 | ENSG00000130816 | DNA methyltransferase 1                                  |
| DHRS13  | -0.98 | 3.80 | ENSG00000167536 | dehydrogenase/reductase 13                               |
| TOB1    | -0.98 | 5.47 | ENSG00000141232 | transducer of ERBB2, 1                                   |
| CREBBP  | -0.99 | 4.97 | ENSG00000005339 | CREB binding protein                                     |
| ETF1    | -0.99 | 6.76 | ENSG00000120705 | eukaryotic translation termination factor 1              |
| DHX37   | -0.99 | 6.97 | ENSG00000150990 | DEAH-box helicase 37                                     |
| DCPS    | -0.99 | 7.13 | ENSG00000110063 | decapping enzyme, scavenger                              |
| NCAPH   | -0.99 | 5.87 | ENSG00000121152 | non-SMC condensin I complex subunit H                    |
| TSSK6   | -0.99 | 1.76 | ENSG00000178093 | testis specific serine kinase 6                          |
| EIF4H   | -0.99 | 6.53 | ENSG00000106682 | eukaryotic translation initiation factor 4H              |
| P2RY11  | -0.99 | 1.93 | ENSG00000244165 | purinergic receptor P2Y11                                |
| DEPDC5  | -0.99 | 3.49 | ENSG00000100150 | DEP domain containing 5                                  |
| ORC1    | -0.99 | 4.80 | ENSG00000085840 | origin recognition complex subunit 1                     |
| MEX3D   | -0.99 | 4.41 | ENSG00000181588 | mex-3 RNA binding family member D                        |
| PPIF    | -1.00 | 6.96 | ENSG00000108179 | peptidylprolyl isomerase F                               |
| PLAGL2  | -1.00 | 5.45 | ENSG00000126003 | PLAG1 like zinc finger 2                                 |
| ASS1P11 | -1.00 | 2.20 | ENSG00000225308 | argininosuccinate synthetase 1 pseudogene 11             |
| BCL9L   | -1.00 | 7.02 | ENSG00000186174 | B-cell CLL/lymphoma 9-like                               |
| NOC2L   | -1.00 | 7.20 | ENSG00000188976 | NOC2 like nucleolar associated transcriptional repressor |
| ZNF598  | -1.01 | 6.83 | ENSG00000167962 | zinc finger protein 598                                  |
| GATA2   | -1.01 | 4.18 | ENSG00000179348 | GATA binding protein 2                                   |
| SRFBP1  | -1.01 | 1.98 | ENSG00000151304 | serum response factor binding protein 1                  |
| PLEKHA7 | -1.01 | 3.78 | ENSG00000166689 | pleckstrin homology domain containing A7                 |

|               |       |      |                 |                                                                 |
|---------------|-------|------|-----------------|-----------------------------------------------------------------|
| NTS           | -1.01 | 8.20 | ENSG00000133636 | neurotensin                                                     |
| SARM1         | -1.01 | 3.88 | ENSG00000004139 | sterile alpha and TIR motif containing 1                        |
| NCOA5         | -1.01 | 5.56 | ENSG00000124160 | nuclear receptor coactivator 5                                  |
| TSR1          | -1.02 | 5.39 | ENSG00000167721 | TSR1, ribosome maturation factor                                |
| CCDC86        | -1.02 | 6.44 | ENSG00000110104 | coiled-coil domain containing 86                                |
| RP11-517B11.7 | -1.02 | 1.08 | ENSG00000261167 | N/A                                                             |
| NUDT19        | -1.02 | 4.79 | ENSG00000213965 | nudix hydrolase 19                                              |
| TRIM56        | -1.02 | 2.28 | ENSG00000169871 | tripartite motif containing 56                                  |
| MORF4L1P1     | -1.02 | 1.29 | ENSG00000218283 | mortality factor 4 like 1 pseudogene 1                          |
| RP11-473I1.9  | -1.02 | 1.29 | ENSG00000263244 | N/A                                                             |
| ZNF689        | -1.02 | 4.24 | ENSG00000156853 | zinc finger protein 689                                         |
| FOXG1         | -1.03 | 2.82 | ENSG00000176165 | forkhead box G1                                                 |
| MDM1          | -1.03 | 2.55 | ENSG00000111554 | Mdm1 nuclear protein                                            |
| FAM21C        | -1.03 | 1.96 | ENSG00000172661 | family with sequence similarity 21 member C                     |
| RCC2          | -1.03 | 5.55 | ENSG00000281540 | regulator of chromosome condensation 2                          |
| SHPK          | -1.03 | 3.65 | ENSG00000197417 | sedoheptulokinase                                               |
| SLC4A2        | -1.03 | 8.26 | ENSG00000164889 | solute carrier family 4 member 2                                |
| AMOTL2        | -1.03 | 4.88 | ENSG00000114019 | angiomin like 2                                                 |
| NFE2L2        | -1.04 | 7.64 | ENSG00000116044 | nuclear factor, erythroid 2 like 2                              |
| DDC           | -1.04 | 4.30 | ENSG00000132437 | dopa decarboxylase                                              |
| HSP90AB3P     | -1.04 | 2.15 | ENSG00000183199 | heat shock protein 90 alpha family class B member 3, pseudogene |
| RP11-550F7.1  | -1.04 | 2.26 | ENSG00000240809 | N/A                                                             |
| ZNF629        | -1.04 | 3.47 | ENSG00000102870 | zinc finger protein 629                                         |
| OR2I1P        | -1.04 | 1.37 | ENSG00000231973 | olfactory receptor family 2 subfamily I member 1 pseudogene     |
| C1orf106      | -1.04 | 4.81 | ENSG00000163362 | chromosome 1 open reading frame 106                             |
| MRI1          | -1.05 | 3.32 | ENSG00000037757 | methylthioribose-1-phosphate isomerase 1                        |
| F2RL2         | -1.05 | 3.06 | ENSG00000164220 | coagulation factor II thrombin receptor like 2                  |

|               |       |      |                 |                                                                            |
|---------------|-------|------|-----------------|----------------------------------------------------------------------------|
| C20orf24      | -1.05 | 6.24 | ENSG00000101084 | chromosome 20 open reading frame 24                                        |
| MYC           | -1.05 | 6.89 | ENSG00000136997 | v-myc avian myelocytomatosis viral oncogene homolog                        |
| AKIRIN1       | -1.06 | 5.81 | ENSG00000174574 | akirin 1                                                                   |
| MICAL3        | -1.06 | 3.39 | ENSG00000243156 | microtubule associated monooxygenase, calponin and LIM domain containing 3 |
| AARS2         | -1.06 | 4.89 | ENSG00000124608 | alanyl-tRNA synthetase 2, mitochondrial                                    |
| PRR12         | -1.06 | 6.18 | ENSG00000126464 | proline rich 12                                                            |
| LYZ           | -1.06 | 4.56 | ENSG00000090382 | lysozyme                                                                   |
| C17orf51      | -1.06 | 3.44 | ENSG00000212719 | chromosome 17 open reading frame 51                                        |
| RP11-251G23.5 | -1.06 | 1.03 | ENSG00000272604 | N/A                                                                        |
| C9orf64       | -1.07 | 3.93 | ENSG00000165118 | chromosome 9 open reading frame 64                                         |
| CYTH3         | -1.07 | 3.89 | ENSG00000008256 | cytohesin 3                                                                |
| HAL           | -1.08 | 6.46 | ENSG00000084110 | histidine ammonia-lyase                                                    |
| TAF5L         | -1.08 | 4.31 | ENSG00000135801 | TATA-box binding protein associated factor 5 like                          |
| PMM2          | -1.08 | 4.63 | ENSG00000140650 | phosphomannomutase 2                                                       |
| DOK3          | -1.08 | 2.61 | ENSG00000146094 | docking protein 3                                                          |
| KLHL21        | -1.08 | 4.68 | ENSG00000162413 | kelch like family member 21                                                |
| FAM53C        | -1.09 | 4.88 | ENSG00000120709 | family with sequence similarity 53 member C                                |
| EGR1          | -1.09 | 2.70 | ENSG00000120738 | early growth response 1                                                    |
| BCL2L2        | -1.10 | 3.60 | ENSG00000129473 | BCL2 like 2                                                                |
| TNPO3         | -1.10 | 5.28 | ENSG00000064419 | transportin 3                                                              |
| XXYLT1        | -1.10 | 5.22 | ENSG00000173950 | xyloside xylosyltransferase 1                                              |
| SYDE2         | -1.11 | 1.21 | ENSG00000097096 | synapse defective Rho GTPase homolog 2                                     |
| PHLDB1        | -1.11 | 5.19 | ENSG00000019144 | pleckstrin homology like domain family B member 1                          |
| MIR600HG      | -1.12 | 2.28 | ENSG00000236901 | MIR600 host gene                                                           |
| FCF1P2        | -1.12 | 1.15 | ENSG00000228638 | FCF1 pseudogene 2                                                          |
| CTB-131K11.1  | -1.12 | 2.74 | ENSG00000266469 | N/A                                                                        |

|               |       |      |                 |                                                     |
|---------------|-------|------|-----------------|-----------------------------------------------------|
| RNF152        | -1.12 | 3.70 | ENSG00000176641 | ring finger protein 152                             |
| DNAJC11       | -1.12 | 5.30 | ENSG00000007923 | DnaJ heat shock protein family (Hsp40) member C11   |
| CCDC85C       | -1.12 | 4.54 | ENSG00000205476 | coiled-coil domain containing 85C                   |
| ATF4P4        | -1.13 | 1.89 | ENSG00000256167 | activating transcription factor 4 pseudogene 4      |
| SF3A1         | -1.13 | 6.94 | ENSG00000099995 | splicing factor 3a subunit 1                        |
| EDC4          | -1.13 | 5.36 | ENSG00000038358 | enhancer of mRNA decapping 4                        |
| ZNF485        | -1.13 | 1.08 | ENSG00000198298 | zinc finger protein 485                             |
| ERF           | -1.14 | 8.01 | ENSG00000105722 | ETS2 repressor factor                               |
| CCDC88C       | -1.14 | 4.00 | ENSG00000015133 | coiled-coil domain containing 88C                   |
| GINS4         | -1.14 | 3.67 | ENSG00000147536 | GINS complex subunit 4                              |
| CA2           | -1.15 | 6.41 | ENSG00000104267 | carbonic anhydrase 2                                |
| SMPD4         | -1.16 | 6.75 | ENSG00000136699 | sphingomyelin phosphodiesterase 4                   |
| C1orf109      | -1.16 | 3.18 | ENSG00000116922 | chromosome 1 open reading frame 109                 |
| S100A9        | -1.17 | 5.18 | ENSG00000163220 | S100 calcium binding protein A9                     |
| SLC30A10      | -1.17 | 1.39 | ENSG00000196660 | solute carrier family 30 member 10                  |
| CHRN3         | -1.17 | 1.25 | ENSG00000147432 | cholinergic receptor nicotinic beta 3 subunit       |
| LINC00176     | -1.17 | 1.10 | ENSG00000196421 | long intergenic non-protein coding RNA 176          |
| DANCR         | -1.17 | 7.88 | ENSG00000226950 | differentiation antagonizing non-protein coding RNA |
| RP11-500C11.3 | -1.17 | 2.05 | ENSG00000272269 | N/A                                                 |
| RP11-613M10.6 | -1.17 | 2.38 | ENSG00000234160 | N/A                                                 |
| MARS2         | -1.18 | 3.24 | ENSG00000247626 | methionyl-tRNA synthetase 2, mitochondrial          |
| VAV3          | -1.19 | 1.03 | ENSG00000134215 | vav guanine nucleotide exchange factor 3            |
| UHRF1         | -1.19 | 3.39 | ENSG00000276043 | ubiquitin like with PHD and ring finger domains 1   |
| TGM2          | -1.20 | 8.39 | ENSG00000198959 | transglutaminase 2                                  |
| ZC3H4         | -1.20 | 5.38 | ENSG00000130749 | zinc finger CCCH-type containing 4                  |
| ENPP2         | -1.20 | 2.23 | ENSG00000136960 | ectonucleotide pyrophosphatase/phosphodiesterase 2  |

|               |       |      |                 |                                                                         |
|---------------|-------|------|-----------------|-------------------------------------------------------------------------|
| TGFB3         | -1.20 | 2.33 | ENSG00000119699 | transforming growth factor beta 3                                       |
| SAPCD2        | -1.20 | 4.38 | ENSG00000186193 | suppressor APC domain containing 2                                      |
| RP11-498C9.15 | -1.21 | 2.04 | ENSG00000263731 | N/A                                                                     |
| PITX3         | -1.23 | 4.46 | ENSG00000107859 | paired like homeodomain 3                                               |
| EIF4A1        | -1.23 | 1.67 | ENSG00000161960 | eukaryotic translation initiation factor 4A1                            |
| ZNF230        | -1.23 | 1.67 | ENSG00000159882 | zinc finger protein 230                                                 |
| EVC           | -1.23 | 3.95 | ENSG00000072840 | EvC ciliary complex subunit 1                                           |
| MAML1         | -1.24 | 4.97 | ENSG00000161021 | mastermind like transcriptional coactivator 1                           |
| CDK2AP1       | -1.24 | 4.83 | ENSG00000111328 | cyclin dependent kinase 2 associated protein 1                          |
| CPLX2         | -1.26 | 5.03 | ENSG00000145920 | complexin 2                                                             |
| RAVER1        | -1.26 | 5.38 | ENSG00000161847 | ribonucleoprotein, PTB binding 1                                        |
| C17orf67      | -1.26 | 1.74 | ENSG00000214226 | chromosome 17 open reading frame 67                                     |
| KIF18B        | -1.26 | 6.11 | ENSG00000186185 | kinesin family member 18B                                               |
| DLGAP1        | -1.28 | 3.22 | ENSG00000170579 | DLG associated protein 1                                                |
| SPEN          | -1.28 | 6.22 | ENSG00000065526 | spen family transcriptional repressor                                   |
| FOXM1         | -1.29 | 7.20 | ENSG00000111206 | forkhead box M1                                                         |
| SAA4          | -1.29 | 2.95 | ENSG00000148965 | serum amyloid A4, constitutive                                          |
| FABP5         | -1.30 | 1.19 | ENSG00000164687 | fatty acid binding protein 5                                            |
| TRIP13        | -1.30 | 5.53 | ENSG00000071539 | thyroid hormone receptor interactor 13                                  |
| DLX2          | -1.31 | 2.15 | ENSG00000115844 | distal-less homeobox 2                                                  |
| PCSK9         | -1.33 | 4.83 | ENSG00000169174 | proprotein convertase subtilisin/kexin type 9                           |
| PER2          | -1.33 | 2.55 | ENSG00000132326 | period circadian clock 2                                                |
| BRF2          | -1.34 | 2.28 | ENSG00000104221 | BRF2, RNA polymerase III transcription initiation factor 50 kDa subunit |
| GTSE1         | -1.35 | 4.96 | ENSG00000075218 | G2 and S-phase expressed 1                                              |
| FES           | -1.37 | 2.15 | ENSG00000182511 | FES proto-oncogene, tyrosine kinase                                     |
| MAN2A2        | -1.37 | 6.23 | ENSG00000196547 | mannosidase alpha class 2A member 2                                     |
| RP11-449P15.2 | -1.39 | 1.40 | ENSG00000273151 | N/A                                                                     |



|            |       |      |                 |                                                                         |
|------------|-------|------|-----------------|-------------------------------------------------------------------------|
| POM121     | -1.40 | 3.66 | ENSG00000196313 | POM121 transmembrane nucleoporin                                        |
| ZNF850     | -1.42 | 1.56 | ENSG00000267041 | zinc finger protein 850                                                 |
| DDN        | -1.42 | 1.62 | ENSG00000181418 | dendrin                                                                 |
| SKP2       | -1.42 | 3.82 | ENSG00000145604 | S-phase kinase associated protein 2                                     |
| MLLT1      | -1.43 | 5.15 | ENSG00000130382 | MLLT1, super elongation complex subunit                                 |
| TXNDC5     | -1.44 | 3.59 | ENSG00000239264 | thioredoxin domain containing 5                                         |
| CHERP      | -1.44 | 5.60 | ENSG00000085872 | calcium homeostasis endoplasmic reticulum protein                       |
| DUSP9      | -1.46 | 7.84 | ENSG00000130829 | dual specificity phosphatase 9                                          |
| CHGA       | -1.46 | 1.45 | ENSG00000100604 | chromogranin A                                                          |
| PDXP       | -1.47 | 1.38 | ENSG00000241360 | pyridoxal phosphatase                                                   |
| NR4A2      | -1.50 | 5.12 | ENSG00000153234 | nuclear receptor subfamily 4 group A member 2                           |
| HSP90AB2P  | -1.50 | 1.62 | ENSG00000205940 | heat shock protein 90 alpha family class B member 2, pseudogene         |
| NEIL3      | -1.52 | 3.86 | ENSG00000109674 | nei like DNA glycosylase 3                                              |
| TIMP3      | -1.52 | 3.79 | ENSG00000100234 | TIMP metallopeptidase inhibitor 3                                       |
| AC141586.5 | -1.55 | 1.01 | ENSG00000215154 | N/A                                                                     |
| RFFL       | -1.56 | 5.28 | ENSG00000092871 | ring finger and FYVE like domain containing E3 ubiquitin protein ligase |
| CASZ1      | -1.60 | 1.75 | ENSG00000130940 | castor zinc finger 1                                                    |
| DLL4       | -1.61 | 3.96 | ENSG00000128917 | delta like canonical Notch ligand 4                                     |
| SLC25A25   | -1.61 | 3.96 | ENSG00000148339 | solute carrier family 25 member 25                                      |
| NR4A1      | -1.65 | 7.12 | ENSG00000123358 | nuclear receptor subfamily 4 group A member 1                           |
| LRP2       | -1.67 | 5.17 | ENSG00000081479 | LDL receptor related protein 2                                          |
| ZNF316     | -1.68 | 2.84 | ENSG00000205903 | zinc finger protein 316                                                 |
| KBTBD4     | -1.69 | 1.62 | ENSG00000123444 | kelch repeat and BTB domain containing 4                                |
| BHLHA15    | -1.70 | 2.89 | ENSG00000180535 | basic helix-loop-helix family member a15                                |
| CNN2       | -1.75 | 6.78 | ENSG00000064666 | calponin 2                                                              |
| SRXN1      | -1.77 | 1.26 | ENSG00000271303 | sulfiredoxin 1                                                          |
| ATF5       | -1.78 | 6.26 | ENSG00000169136 | activating transcription factor 5                                       |

|              |       |      |                 |                                          |
|--------------|-------|------|-----------------|------------------------------------------|
| G6PC         | -1.85 | 3.41 | ENSG00000131482 | glucose-6-phosphatase catalytic subunit  |
| RP11-242D8.1 | -1.95 | 2.77 | ENSG00000267002 | N/A                                      |
| SERBP1       | -1.98 | 8.54 | ENSG00000142864 | SERPINE1 mRNA binding protein 1          |
| DGCR6        | -2.00 | 5.52 | ENSG00000183628 | DiGeorge syndrome critical region gene 6 |
| AFP          | -2.11 | 5.99 | ENSG00000081051 | alpha fetoprotein                        |
| USP18        | -2.46 | 3.66 | ENSG00000184979 | ubiquitin specific peptidase 18          |
| IL1RN        | -2.58 | 1.79 | ENSG00000136689 | interleukin 1 receptor antagonist        |

**Supplementary Table 5**

| Gene symbol   | Gene ID         | Gene symbol   | Gene ID         | Gene symbol   | Gene ID         |
|---------------|-----------------|---------------|-----------------|---------------|-----------------|
| TSPAN33       | ENSG00000158457 | CALCOCO1      | ENSG00000012822 | ARHGAP40      | ENSG00000124143 |
| BRE           | ENSG00000158019 | STYXL1        | ENSG00000127952 | C2CD4C        | ENSG00000183186 |
| CERS5         | ENSG00000139624 | CASC15        | ENSG00000272168 | RP11-620J15.3 | ENSG00000257698 |
| ALPK1         | ENSG00000073331 | NKD1          | ENSG00000140807 | P2RX4         | ENSG00000135124 |
| CCDC71L       | ENSG00000253276 | C11orf74      | ENSG00000166352 | PLEKHB1       | ENSG00000021300 |
| MNS1          | ENSG00000138587 | MALAT1        | ENSG00000278217 | NBL1          | ENSG00000158747 |
| C14orf105     | ENSG00000100557 | RTN2          | ENSG00000125744 | QSOX1         | ENSG00000116260 |
| PLEKHA4       | ENSG00000105559 | ITGA7         | ENSG00000135424 | NXPH4         | ENSG00000182379 |
| TMEM45A       | ENSG00000181458 | SGCB          | ENSG00000163069 | PXDC1         | ENSG00000168994 |
| KDELR3        | ENSG00000100196 | GPR137B       | ENSG00000077585 | PGM2L1        | ENSG00000165434 |
| PRSS12        | ENSG00000164099 | RNF103        | ENSG00000239305 | TMEM182       | ENSG00000170417 |
| HLA-L         | ENSG00000243753 | A4GALT        | ENSG00000128274 | NEBL          | ENSG00000078114 |
| HID1          | ENSG00000167861 | DSE           | ENSG00000111817 | REC8          | ENSG00000100918 |
| CAMK2N1       | ENSG00000162545 | RHOBTB1       | ENSG00000072422 | HERC6         | ENSG00000138642 |
| RP11-403I13.8 | ENSG00000272419 | RP11-421F16.3 | ENSG00000247903 | C15orf52      | ENSG00000188549 |
| CKAP4         | ENSG00000136026 | ZFHX2         | ENSG00000136367 | STK39         | ENSG00000198648 |
| C1R           | ENSG00000159403 | COL7A1        | ENSG00000114270 | CYP27A1       | ENSG00000135929 |
| LRRC27        | ENSG00000148814 | SRP14-AS1     | ENSG00000248508 | RP11-977G19.5 | ENSG00000258199 |
| PROX1-AS1     | ENSG00000272167 | FABP1         | ENSG00000163586 | EFCAB12       | ENSG00000172771 |
| CYB5RL        | ENSG00000215883 | HLA-C         | ENSG00000204525 | LTB           | ENSG00000223448 |
| GS1-358P8.4   | ENSG00000260822 | GRN           | ENSG00000030582 | GARNL3        | ENSG00000136895 |
| TP53I3        | ENSG00000115129 | VAMP2         | ENSG00000220205 | SLC27A1       | ENSG00000130304 |
| SERPINA1      | ENSG00000197249 | HLA-A         | ENSG00000224320 | LGALS3BP      | ENSG00000108679 |
| LRRC23        | ENSG00000010626 | DGKA          | ENSG00000065357 | ALDH3B1       | ENSG00000006534 |
| SLFN5         | ENSG00000166750 | PTPRH         | ENSG00000080031 | F10           | ENSG00000126218 |
| TRIOBP        | ENSG00000100106 | HLA-E         | ENSG00000225201 | KCNH3         | ENSG00000135519 |
| CYSTM1        | ENSG00000120306 | DLX4          | ENSG00000108813 | UBE2L6        | ENSG00000156587 |
| RASSF5        | ENSG00000266094 | RP11-103J17.2 | ENSG00000261761 | ITGA3         | ENSG00000005884 |
| AGBL3         | ENSG00000146856 | ZNF93         | ENSG00000184635 | UGT2B7        | ENSG00000171234 |
| EPDR1         | ENSG00000086289 | TMEM151A      | ENSG00000179292 | IFITM3        | ENSG00000142089 |
| PLOD1         | ENSG00000083444 | ACSF2         | ENSG00000167107 | CACNB3        | ENSG00000167535 |
| MORN2         | ENSG00000188010 | SYTL4         | ENSG00000102362 | REEP2         | ENSG00000132563 |
| YJEFN3        | ENSG00000250067 | HECA          | ENSG00000112406 | DKK3          | ENSG00000050165 |
| GABBR1        | ENSG00000237112 | NPNT          | ENSG00000168743 | CAPN5         | ENSG00000149260 |

|              |                 |               |                 |               |                 |
|--------------|-----------------|---------------|-----------------|---------------|-----------------|
| SEMA6C       | ENSG00000143434 | RAB4B         | ENSG00000167578 | CAV2          | ENSG00000105971 |
| FUCA1        | ENSG00000179163 | MR1           | ENSG00000153029 | C1QTNF1       | ENSG00000173918 |
| CD99         | ENSG00000002586 | S100A11       | ENSG00000163191 | HLA-F         | ENSG00000229698 |
| DYNLT3       | ENSG00000165169 | SH3RF2        | ENSG00000156463 | TMSB10P1      | ENSG00000228499 |
| ZNF287       | ENSG00000141040 | FZD2          | ENSG00000180340 | AC005355.2    | ENSG00000251169 |
| PSENNEN      | ENSG00000205155 | PRRG2         | ENSG00000126460 | SPOCK2        | ENSG00000107742 |
| CTSF         | ENSG00000174080 | RIMKLA        | ENSG00000177181 | SOCS2         | ENSG00000120833 |
| HSPA1A       | ENSG00000234475 | IGIP          | ENSG00000182700 | NEURL3        | ENSG00000163121 |
| FGFR1        | ENSG00000077782 | FMO5          | ENSG00000131781 | LRRC8C        | ENSG00000171488 |
| MUC1         | ENSG00000185499 | MAPRE3        | ENSG00000084764 | HLA-DMA       | ENSG00000243215 |
| SMPDL3B      | ENSG00000130768 | TSPAN15       | ENSG00000099282 | GBP2          | ENSG00000162645 |
| C11orf49     | ENSG00000149179 | RTN4RL1       | ENSG00000185924 | PBXIP1        | ENSG00000163346 |
| TLL7         | ENSG00000137941 | PCSK1N        | ENSG00000102109 | HIST1H2BD     | ENSG00000158373 |
| BTN3A2       | ENSG00000186470 | SPA17         | ENSG00000064199 | SP100         | ENSG00000067066 |
| FLRT2        | ENSG00000185070 | VMAC          | ENSG00000187650 | DENND6B       | ENSG00000205593 |
| PRRT1        | ENSG00000229071 | ZNF362        | ENSG00000160094 | CCDC88B       | ENSG00000168071 |
| TMEM25       | ENSG00000149582 | PARM1         | ENSG00000169116 | PCAT6         | ENSG00000228288 |
| CRYL1        | ENSG00000165475 | ANG           | ENSG00000214274 | HLA-B         | ENSG00000206450 |
| ZFYVE1       | ENSG00000165861 | TCEAL3        | ENSG00000196507 | CTD-2545H1.2  | ENSG00000262445 |
| NDRG4        | ENSG00000103034 | NPDC1         | ENSG00000107281 | VNN3          | ENSG00000093134 |
| DHRS12       | ENSG00000102796 | SLC44A2       | ENSG00000129353 | DNAH5         | ENSG00000039139 |
| ADPRHL1      | ENSG00000153531 | OSER1-AS1     | ENSG00000223891 | TCF7L1        | ENSG00000152284 |
| CLTB         | ENSG00000175416 | NDUFA13       | ENSG00000186010 | CAV1          | ENSG00000105974 |
| BLOC1S1      | ENSG00000135441 | FAXDC2        | ENSG00000170271 | VIM           | ENSG00000026025 |
| FSTL3        | ENSG00000070404 | C20orf196     | ENSG00000171984 | TMEM54        | ENSG00000121900 |
| SHFM1        | ENSG00000127922 | HLA-G         | ENSG00000235680 | TMEM37        | ENSG00000171227 |
| TBC1D19      | ENSG00000109680 | RP11-218M22.1 | ENSG00000177406 | RASSF2        | ENSG00000101265 |
| TMA7         | ENSG00000232112 | FOXQ1         | ENSG00000164379 | EMB           | ENSG00000170571 |
| ATP9A        | ENSG00000054793 | FCHSD1        | ENSG00000197948 | F2R           | ENSG00000181104 |
| FAM214B      | ENSG00000005238 | ATP2B4        | ENSG00000058668 | PPP1R3C       | ENSG00000119938 |
| CCDC28B      | ENSG00000160050 | CLVS1         | ENSG00000177182 | RP11-284F21.9 | ENSG00000272068 |
| LGALS3       | ENSG00000131981 | RPL39L        | ENSG00000163923 | DAPK2         | ENSG00000035664 |
| RP11-465N4.4 | ENSG00000234678 | LIPH          | ENSG00000163898 | LGALS1        | ENSG00000100097 |
| FAM229B      | ENSG00000203778 | HDX           | ENSG00000165259 | HPSE          | ENSG00000173083 |
| ANXA6        | ENSG00000197043 | THBS3         | ENSG00000169231 | SCN1B         | ENSG00000105711 |
| SEMA3B       | ENSG00000012171 | ZSWIM4        | ENSG00000132003 | CLU           | ENSG00000120885 |
| OAS3         | ENSG00000111331 | PLXNA2        | ENSG00000076356 | TIMP2         | ENSG00000035862 |

|          |                 |              |                 |           |                 |
|----------|-----------------|--------------|-----------------|-----------|-----------------|
| NTAN1    | ENSG00000275779 | GPX8         | ENSG00000164294 | CCNG2     | ENSG00000138764 |
| FNDC4    | ENSG00000115226 | SERPING1     | ENSG00000149131 | IFITM2    | ENSG00000185201 |
| CD47     | ENSG00000196776 | SLC30A3      | ENSG00000115194 | BMF       | ENSG00000104081 |
| PIK3AP1  | ENSG00000155629 | CYB5R2       | ENSG00000166394 | LAMB3     | ENSG00000196878 |
| NPHP1    | ENSG00000144061 | STAT1        | ENSG00000115415 | VNN2      | ENSG00000112303 |
| TAGLN    | ENSG00000149591 | COMMD6       | ENSG00000188243 | SERPINA5  | ENSG00000188488 |
| GINM1    | ENSG00000055211 | MYL9         | ENSG00000101335 | TMEM86A   | ENSG00000151117 |
| BBS12    | ENSG00000181004 | ZDHHC1       | ENSG00000159714 | SERPINE2  | ENSG00000135919 |
| ITGA2    | ENSG00000164171 | FAM174B      | ENSG00000185442 | C10orf10  | ENSG00000165507 |
| GDPD5    | ENSG00000158555 | APLP1        | ENSG00000105290 | F2RL1     | ENSG00000164251 |
| FAM114A1 | ENSG00000197712 | TUBA1A       | ENSG00000167552 | CDKN1A    | ENSG00000124762 |
| CD59     | ENSG00000085063 | PDGFB        | ENSG00000100311 | PRAP1     | ENSG00000165828 |
| PCMTD1   | ENSG00000168300 | DHRS3        | ENSG00000162496 | LINC00694 | ENSG00000225873 |
| SP140L   | ENSG00000185404 | AGPAT4       | ENSG00000026652 | GALNT6    | ENSG00000139629 |
| SMOC1    | ENSG00000198732 | ORA13        | ENSG00000175938 | NDRG1     | ENSG00000104419 |
| RABL2A   | ENSG00000144134 | CSF1         | ENSG00000184371 | PAQR8     | ENSG00000170915 |
| SHISA4   | ENSG00000198892 | SAMD9        | ENSG00000205413 | ENO2      | ENSG00000111674 |
| MIR24-2  | ENSG00000267519 | MMP19        | ENSG00000123342 | SLC5A12   | ENSG00000148942 |
| WWTR1    | ENSG00000018408 | NT5E         | ENSG00000135318 | NFATC4    | ENSG00000100968 |
| TESC     | ENSG00000088992 | SAT1         | ENSG00000130066 | CEACAM1   | ENSG00000079385 |
| DDR1     | ENSG00000230456 | FBXO2        | ENSG00000116661 | LINC00511 | ENSG00000227036 |
| C4orf19  | ENSG00000154274 | BNIP3L       | ENSG00000104765 | CDK18     | ENSG00000117266 |
| CAPS     | ENSG00000105519 | RRAS         | ENSG00000126458 | PIGZ      | ENSG00000119227 |
| KIAA1462 | ENSG00000165757 | GPR153       | ENSG00000158292 | FAM131C   | ENSG00000185519 |
| MTND1P23 | ENSG00000225972 | RP11-244H3.1 | ENSG00000241014 | CFB       | ENSG00000243649 |
| CDON     | ENSG00000064309 | MTMR11       | ENSG00000014914 | CD74      | ENSG00000019582 |
| TJP3     | ENSG00000105289 | GOLM1        | ENSG00000135052 | MOXD1     | ENSG00000079931 |
| ZSWIM5   | ENSG00000162415 | APBB1        | ENSG00000166313 | TIMP1     | ENSG00000102265 |
| RASSF4   | ENSG00000107551 | RASSF6       | ENSG00000169435 | CD7       | ENSG00000173762 |
| PLA2G4C  | ENSG00000105499 | MFSD6        | ENSG00000151690 | CA9       | ENSG00000107159 |
| SP110    | ENSG00000135899 | CPM          | ENSG00000135678 | EMP3      | ENSG00000142227 |
| GPR161   | ENSG00000143147 | SLC6A16      | ENSG00000063127 | S100A4    | ENSG00000196154 |
| MVP      | ENSG00000013364 | FLVCR2       | ENSG00000119686 | OLFML2A   | ENSG00000185585 |
| JAK1     | ENSG00000162434 | UACA         | ENSG00000137831 | TMEM59L   | ENSG00000105696 |
| TNFAIP8  | ENSG00000145779 | TUBB3        | ENSG00000258947 | QPCT      | ENSG00000115828 |
| MORN4    | ENSG00000171160 | TP53TG1      | ENSG00000182165 | IFI6      | ENSG00000126709 |

**Supplementary Table 6**

| <b>Biological Process</b>                                                                                                    | <b>number of gene</b> | <b>p-value</b> | <b>Gene symbol</b>                                                                             |
|------------------------------------------------------------------------------------------------------------------------------|-----------------------|----------------|------------------------------------------------------------------------------------------------|
| GO:0060337~type I interferon signaling pathway                                                                               | 14                    | 8.57E-10       | SP100, IFITM2, IFITM3, OAS3, HLA-A, HLA-C, HLA-B, STAT1, HLA-E, HLA-G, HLA-F, JAK1, IFI6, GBP2 |
| GO:0002480~antigen processing and presentation of exogenous peptide antigen via MHC class I, TAP-independent                 | 6                     | 5.32E-07       | HLA-A, HLA-C, HLA-B, HLA-E, HLA-G, HLA-F                                                       |
| GO:0060333~interferon-gamma-mediated signaling pathway                                                                       | 11                    | 2.75E-06       | SP100, OAS3, HLA-A, JAK1, HLA-C, HLA-B, HLA-E, STAT1, GBP2, HLA-G, HLA-F                       |
| GO:0002474~antigen processing and presentation of peptide antigen via MHC class I                                            | 7                     | 5.44E-05       | HLA-A, HLA-C, MR1, HLA-B, HLA-E, HLA-G, HLA-F                                                  |
| GO:0019882~antigen processing and presentation                                                                               | 7                     | 4.36E-04       | HLA-A, HLA-C, MR1, HLA-B, HLA-E, CD74, HLA-G                                                   |
| GO:0002486~antigen processing and presentation of endogenous peptide antigen via MHC class I via ER pathway, TAP-independent | 3                     | 1.37E-03       | HLA-A, HLA-C, HLA-B                                                                            |
| GO:0048661~positive regulation of smooth muscle cell proliferation                                                           | 7                     | 3.43E-03       | HDAC4, PDGFB, SKP2, TGM2, ITGA2, RPS6KB1, STAT1                                                |
| GO:0030198~extracellular matrix organization                                                                                 | 12                    | 3.59E-03       | DDR1, CD47, LAMB3, PDGFB, COL7A1, HPSE, SPOCK2, NPNT, ITGA7, OLFML2A, ITGA2, ITGA3             |
| GO:0010951~negative regulation of endopeptidase activity                                                                     | 9                     | 4.71E-03       | SERPINE2, COL7A1, SPOCK2, SERPINA5, SERPING1, SERPINA1, PCSK1N, TIMP2, TIMP1                   |
| GO:0006469~negative regulation of protein kinase activity                                                                    | 8                     | 5.90E-03       | FLRT2, TESC, SOCS2, RTN4RL1, WWTR1, CAMK2N1, CEACAM1, DNAJA3                                   |
| GO:0042270~protection from natural killer cell mediated cytotoxicity                                                         | 3                     | 6.57E-03       | HLA-A, HLA-B, HLA-E                                                                            |
| GO:0002576~platelet degranulation                                                                                            | 8                     | 6.92E-03       | LGALS3BP, APOA1, PDGFB, CLU, SERPING1, SERPINA1, QSOX1, TIMP1                                  |

|                                                                                                            |    |          |                                                                                                                                 |
|------------------------------------------------------------------------------------------------------------|----|----------|---------------------------------------------------------------------------------------------------------------------------------|
| GO:0008285~negative regulation of cell proliferation                                                       | 18 | 7.80E-03 | CEBPA, TESC, FBXO2, GABBR1, S100A11, TIMP2, ATF5, DDR1, HDAC4, RASSF5, CDKN1A, SERPINE2, NDRG1, EMP3, UTP20, QSOX1, DNAJA3, F2R |
| GO:0043410~positive regulation of MAPK cascade                                                             | 7  | 8.55E-03 | CAV2, FGFR1, PDGFB, CDON, C1QTNF1, TIMP2, F2R                                                                                   |
| GO:0034340~response to type I interferon                                                                   | 3  | 9.06E-03 | TRIM56, SHMT2, SP100                                                                                                            |
| GO:0006955~immune response                                                                                 | 18 | 1.01E-02 | IFITM2, IFITM3, OAS3, HLA-A, HLA-C, C1R, HLA-B, HLA-E, HLA-DMA, HLA-G, CD74, HLA-F, MR1, MAP3K14, LTB, GBP2, IFI6, CD7          |
| GO:0002479~antigen processing and presentation of exogenous peptide antigen via MHC class I, TAP-dependent | 6  | 1.15E-02 | HLA-A, HLA-C, HLA-B, HLA-E, HLA-G, HLA-F                                                                                        |
| GO:0046324~regulation of glucose import                                                                    | 3  | 1.19E-02 | HK2, RPS6KB1, RTN2                                                                                                              |
| GO:0051899~membrane depolarization                                                                         | 4  | 1.44E-02 | P2RX4, CAV1, SCN1B, CACNB3                                                                                                      |
| GO:0007160~cell-matrix adhesion                                                                            | 7  | 1.46E-02 | EPDR1, HPSE, NPNT, ITGA7, ITGA2, ITGA3, THBS3                                                                                   |
| GO:0035456~response to interferon-beta                                                                     | 3  | 1.51E-02 | IFITM2, IFITM3, STAT1                                                                                                           |
| GO:0046339~diacylglycerol metabolic process                                                                | 3  | 1.51E-02 | DGKA, PGS1, DGKD                                                                                                                |
| GO:0034341~response to interferon-gamma                                                                    | 4  | 1.61E-02 | SP100, IFITM2, IFITM3, DNAJA3                                                                                                   |
| GO:0014911~positive regulation of smooth muscle cell migration                                             | 4  | 1.61E-02 | HDAC4, PDGFB, ITGA2, RPS6KB1                                                                                                    |
| GO:0050900~leukocyte migration                                                                             | 8  | 1.73E-02 | CD47, CAV1, F2RL1, ITGA3, SLC7A5, CEACAM1, CD74, SLC7A11                                                                        |
| GO:0007596~blood coagulation                                                                               | 10 | 1.92E-02 | P2RX4, F10, SERPINE2, CD59, SERPINA5, F2RL1, ITGA2, SERPINA1, MAFK, F2R                                                         |
| GO:0090331~negative regulation of platelet aggregation                                                     | 3  | 2.24E-02 | SERPINE2, C1QTNF1, CEACAM1                                                                                                      |
| GO:0060445~branching involved in salivary gland morphogenesis                                              | 3  | 2.24E-02 | FGFR1, TGM2, ESRP2                                                                                                              |
| GO:0006464~cellular protein modification process                                                           | 7  | 2.61E-02 | QPCT, PLOD1, FBXO2, UBE2L6, TTLL7, RIMKLA, TTLL11                                                                               |
| GO:0001916~positive regulation of T cell mediated cytotoxicity                                             | 3  | 3.09E-02 | HLA-A, HLA-B, HLA-E                                                                                                             |

|                                             |    |          |                                                                                 |
|---------------------------------------------|----|----------|---------------------------------------------------------------------------------|
| GO:0071318~cellular response to ATP         | 3  | 3.09E-02 | P2RX4, P2RY11, PDXP                                                             |
| GO:0051604~protein maturation               | 3  | 3.56E-02 | TESC, TSPAN33, TSPAN15                                                          |
| GO:0009607~response to biotic stimulus      | 3  | 3.56E-02 | IFITM2, IFITM3, PRRT1                                                           |
| GO:0050919~negative chemotaxis              | 4  | 3.63E-02 | FLRT2, APOA1, SEMA6C, SEMA3B                                                    |
| GO:0002931~response to ischemia             | 4  | 3.91E-02 | PPIF, CAV1, HK2, EEF2                                                           |
| GO:0042981~regulation of apoptotic process  | 10 | 4.29E-02 | RASSF5, TP53I3, RASSF6, LGALS1,<br>SERBP1, BNIP3L, SKP2, NDRG1,<br>DAPK2, STAT1 |
| GO:0006695~cholesterol biosynthetic process | 4  | 4.81E-02 | APOA1, FDPS, ACLY, LSS                                                          |



**Supplementary Table 7**

| Altered pathways                                     | Number of gene | p-value  | Gene symbol                                                                                                                  |
|------------------------------------------------------|----------------|----------|------------------------------------------------------------------------------------------------------------------------------|
| hsa05416:Viral myocarditis                           | 9              | 7.31E-05 | CAV1, HLA-A, HLA-C, HLA-B, HLA-E, HLA-DMA, HLA-G, SGCB, HLA-F                                                                |
| hsa05332:Graft-versus-host disease                   | 7              | 1.38E-04 | HLA-A, HLA-C, HLA-B, HLA-E, HLA-DMA, HLA-G, HLA-F                                                                            |
| hsa05166:HTLV-I infection                            | 18             | 1.98E-04 | ADCY3, PDGFB, HLA-A, FDPS, HLA-C, HLA-B, FZD2, HLA-E, HLA-DMA, HLA-G, HLA-F, CDKN1A, WNT3, JAK1, RRAS, NFATC4, MAP3K14, TERT |
| hsa05169:Epstein-Barr virus infection                | 15             | 2.56E-04 | SHFM1, VIM, HLA-A, SKP2, HLA-C, HSPA1A, HLA-B, HLA-E, POLR3E, HLA-G, HLA-F, HDAC4, CDKN1A, JAK1, MAP3K14                     |
| hsa05330:Allograft rejection                         | 7              | 2.67E-04 | HLA-A, HLA-C, HLA-B, HLA-E, HLA-DMA, HLA-G, HLA-F                                                                            |
| hsa04940:Type I diabetes mellitus                    | 7              | 5.43E-04 | HLA-A, HLA-C, HLA-B, HLA-E, HLA-DMA, HLA-G, HLA-F                                                                            |
| hsa04612:Antigen processing and presentation         | 9              | 5.58E-04 | HLA-A, HLA-C, HSPA1A, HLA-B, HLA-E, HLA-DMA, CD74, HLA-G, HLA-F                                                              |
| hsa04145:Phagosome                                   | 12             | 0.0014   | HLA-A, ITGA2, HLA-C, C1R, HLA-B, HLA-E, TUBA1A, HLA-DMA, THBS3, TUBB3, HLA-G, HLA-F                                          |
| hsa04610:Complement and coagulation cascades         | 8              | 0.0015   | F10, CFB, CD59, SERPINA5, SERPING1, C1R, SERPINA1, F2R                                                                       |
| hsa05320:Autoimmune thyroid disease                  | 7              | 0.0017   | HLA-A, HLA-C, HLA-B, HLA-E, HLA-DMA, HLA-G, HLA-F                                                                            |
| hsa05168:Herpes simplex infection                    | 13             | 0.0020   | SP100, OAS3, SKP2, HLA-A, HLA-C, HLA-B, STAT1, HLA-E, HLA-DMA, HLA-G, CD74, HLA-F, JAK1                                      |
| hsa05203:Viral carcinogenesis                        | 13             | 0.005    | HIST1H2BD, SP100, HLA-A, SKP2, HLA-C, HLA-B, HLA-E, HLA-G, HLA-F, HDAC4, CDKN1A, JAK1, DNAJA3                                |
| hsa01130:Biosynthesis of antibiotics                 | 12             | 0.016    | ODC1, SHMT2, FAXDC2, ENO2, FDPS, HK2, ACLY, LSS, UAP1L1, ACAT2, IDH3A, GLDC                                                  |
| hsa04514:Cell adhesion molecules (CAMs)              | 9              | 0.025    | HLA-A, CLDN1, CD99, HLA-C, HLA-B, HLA-E, HLA-DMA, HLA-G, HLA-F                                                               |
| hsa00520:Amino sugar and nucleotide sugar metabolism | 5              | 0.031    | CYB5R2, GNPAT1, HK2, UAP1L1, CYB5RL                                                                                          |

|                                                                 |    |       |                                                                                                                    |
|-----------------------------------------------------------------|----|-------|--------------------------------------------------------------------------------------------------------------------|
| hsa05412:Arrhythmogenic right ventricular cardiomyopathy (ARVC) | 6  | 0.031 | ITGA7, ITGA2, CACNB3, ITGA3, TCF7L1, SGCB                                                                          |
| hsa05200:Pathways in cancer                                     | 17 | 0.035 | CEBPA, ADCY3, FGFR1, PDGFB, SKP2, ITGA2, ITGA3, FZD2, STAT1, DAPK2, TCF7L1, RASSF5, LAMB3, CDKN1A, WNT3, JAK1, F2R |

**Supplementary Table 8**

| <b>Diseases or Functions Annotation</b>    | <b>p-value</b> |
|--------------------------------------------|----------------|
| non-melanoma solid tumor                   | 3.32E-12       |
| cancer                                     | 6.61E-12       |
| malignant solid tumor                      | 1.2E-11        |
| tumorigenesis of tissue                    | 1.71E-10       |
| neoplasia of epithelial tissue             | 2.17E-10       |
| epithelial cancer                          | 3.5E-10        |
| abdominal neoplasm                         | 6.02E-10       |
| abdominal cancer                           | 6.32E-10       |
| cell proliferation of tumor cell lines     | 3.43E-09       |
| digestive system cancer                    | 1.13E-08       |
| digestive organ tumor                      | 2.28E-08       |
| adenocarcinoma                             | 2.51E-08       |
| invasion of cells                          | 0.000000125    |
| proliferation of cells                     | 0.000000183    |
| cell proliferation of carcinoma cell lines | 0.0000002      |
| apoptosis                                  | 0.000000202    |
| cell death                                 | 0.00000023     |
| apoptosis of tumor cell lines              | 0.000000252    |
| psoriasis                                  | 0.000000314    |
| necrosis                                   | 0.000000318    |
| invasion of tumor cell lines               | 0.000000379    |
| cell movement                              | 0.000000612    |
| lymphocytic neoplasm                       | 0.00000101     |
| cell movement of tumor cell lines          | 0.0000011      |
| migration of tumor cell lines              | 0.00000118     |
| gastrointestinal tract cancer              | 0.00000139     |
| respiratory system tumor                   | 0.00000164     |
| lung tumor                                 | 0.00000188     |
| size of lesion                             | 0.00000201     |
| lung cancer                                | 0.00000243     |
| Gastrointestinal Tract Cancer and Tumors   | 0.0000025      |
| large intestine neoplasm                   | 0.00000291     |
| progression of tumor                       | 0.00000306     |
| morphology of lesion                       | 0.00000339     |
| malignant neoplasm of large intestine      | 0.00000453     |

|                                            |            |
|--------------------------------------------|------------|
| cell death of tumor cell lines             | 0.0000047  |
| activation of cells                        | 0.00000532 |
| atherosclerosis                            | 0.00000565 |
| advanced malignant tumor                   | 0.00000649 |
| proliferation of lung cancer cell lines    | 0.00000656 |
| cell death of immune cells                 | 0.00000715 |
| vaso-occlusion                             | 0.0000073  |
| lichen planus                              | 0.00000748 |
| proliferation of liver cells               | 0.0000077  |
| nonmedullary thyroid cancer                | 0.0000078  |
| occlusion of blood vessel                  | 0.00000796 |
| lymphocytic cancer                         | 0.00000862 |
| differentiated thyroid cancer              | 0.00000884 |
| metastasis                                 | 0.00000942 |
| cell death of breast cancer cell lines     | 0.00000986 |
| proliferation of stomach cancer cell lines | 0.0000116  |
| gastrointestinal carcinoma                 | 0.0000122  |
| papillary carcinoma                        | 0.0000132  |
| migration of mononuclear leukocytes        | 0.0000132  |
| leukocyte migration                        | 0.0000138  |
| cell death of blood cells                  | 0.0000139  |
| lymphohematopoietic neoplasia              | 0.0000175  |
| infection of vascular endothelial cells    | 0.0000183  |
| neoplasia of prostate cancer cell lines    | 0.0000197  |
| papillary adenocarcinoma                   | 0.0000203  |
| migration of cells                         | 0.0000204  |
| Lymphoid Cancer and Tumors                 | 0.0000214  |
| synthesis of DNA                           | 0.0000243  |
| outgrowth of neurons                       | 0.0000251  |
| differentiation of cells                   | 0.0000252  |
| outgrowth of cells                         | 0.000027   |
| non-Hodgkin disease                        | 0.0000286  |
| regulation of dendritic cells              | 0.0000312  |
| experimentally-induced diabetes            | 0.0000318  |
| migration of monocytes                     | 0.0000318  |
| hematological neoplasia                    | 0.0000355  |
| neoplasia of leukocytes                    | 0.000037   |

|                                                       |           |
|-------------------------------------------------------|-----------|
| progressive motor neuropathy                          | 0.0000392 |
| growth of tumor                                       | 0.0000413 |
| adhesion of blood cells                               | 0.0000417 |
| cytostasis of prostate cancer cell lines              | 0.0000463 |
| hematologic cancer of cells                           | 0.0000465 |
| proliferation of tumor cells                          | 0.0000469 |
| papillary thyroid cancer                              | 0.0000469 |
| cell movement of myeloid cells                        | 0.0000481 |
| glucose metabolism disorder                           | 0.0000483 |
| arrest in interphase of tumor cells                   | 0.0000485 |
| T-cell lymphoproliferative disorder                   | 0.000049  |
| large intestine carcinoma                             | 0.0000499 |
| HER2 negative hormone receptor negative breast cancer | 0.00005   |
| anoikis                                               | 0.0000532 |
| breast or colorectal cancer                           | 0.0000549 |
| cell movement of leukocytes                           | 0.000055  |
| outgrowth of neurites                                 | 0.0000581 |
| prostatic intraepithelial neoplasia                   | 0.0000613 |
| activation of blood cells                             | 0.0000632 |
| cell proliferation of breast cancer cell lines        | 0.0000638 |
| Infarction                                            | 0.0000644 |
| lymphohematopoietic cancer                            | 0.000065  |
| binding of tumor cell lines                           | 0.0000654 |
| insulin-dependent diabetes mellitus                   | 0.0000656 |
| endothelial cell development                          | 0.0000665 |
| binding of cells                                      | 0.0000674 |
| apoptosis of breast cancer cell lines                 | 0.0000684 |
| metastasis of prostate cancer cell lines              | 0.0000684 |
| fibrosis of liver                                     | 0.0000824 |
| inflammation of organ                                 | 0.0000833 |
| malignant neoplasm of endocrine gland                 | 0.0000893 |
| systemic autoimmune syndrome                          | 0.0000903 |
| colony formation of tumor cell lines                  | 0.0000914 |
| accumulation of antigen presenting cells              | 0.0000935 |
| proliferation of pericytes                            | 0.0000952 |
| homing of cells                                       | 0.000098  |
| epithelial thyroid cancer                             | 0.0000984 |

|                                              |           |
|----------------------------------------------|-----------|
| Pathological Cyst                            | 0.0000986 |
| cell death of carcinoma cell lines           | 0.000102  |
| carcinoma in lung                            | 0.000102  |
| inhibition of lesion                         | 0.000113  |
| thyroid cancer                               | 0.000118  |
| exfoliative glaucoma                         | 0.000119  |
| cell proliferation of hepatoma cell lines    | 0.00012   |
| cell movement of mononuclear leukocytes      | 0.00012   |
| hematologic cancer                           | 0.000122  |
| melanoma                                     | 0.000129  |
| cell movement of phagocytes                  | 0.000133  |
| cell movement of monocytes                   | 0.000136  |
| cell death of muscle cells                   | 0.000148  |
| genital tract cancer                         | 0.000148  |
| cell death of lymphoma cell lines            | 0.000157  |
| Fibrosis                                     | 0.00016   |
| growth of epithelial tissue                  | 0.000161  |
| cytolysis of tumor cell lines                | 0.000168  |
| cell movement of endothelial cells           | 0.000169  |
| development of epithelial tissue             | 0.000171  |
| synthesis of phosphatidylcholine             | 0.000174  |
| endocrine gland tumor                        | 0.000176  |
| arrest in interphase of cancer cells         | 0.00018   |
| tumorigenesis of genital organ               | 0.000186  |
| female genital tract serous carcinoma        | 0.00019   |
| migration of lymphatic system cells          | 0.000191  |
| genital tumor                                | 0.000191  |
| chemotaxis                                   | 0.000193  |
| neuroendocrine tumor                         | 0.000196  |
| amyotrophic lateral sclerosis                | 0.000198  |
| apoptosis of connective tissue cells         | 0.000207  |
| cell death of lung cancer cell lines         | 0.000219  |
| large intestine adenocarcinoma               | 0.000223  |
| head and neck neoplasia                      | 0.000227  |
| Lymphocyte migration                         | 0.00023   |
| incorporation of monounsaturated fatty acids | 0.000236  |
| abdominal adenocarcinoma                     | 0.000239  |

|                                                       |          |
|-------------------------------------------------------|----------|
| adhesion of immune cells                              | 0.000244 |
| adhesion of epithelial cell lines                     | 0.000258 |
| binding of fatty acid                                 | 0.000261 |
| calcification of brain                                | 0.000261 |
| release of alpha granules                             | 0.000261 |
| size of infarct                                       | 0.000271 |
| colony formation of cells                             | 0.00028  |
| regulation of blood cells                             | 0.000281 |
| synthesis of lipid                                    | 0.000282 |
| thyroid gland tumor                                   | 0.000287 |
| pelvic cancer                                         | 0.000288 |
| autosomal dominant disease                            | 0.00029  |
| lymphoid cancer                                       | 0.000291 |
| cell cycle progression of hematopoietic cell lines    | 0.000293 |
| T-cell non-Hodgkin disease                            | 0.000297 |
| apoptosis of lymphoma cell lines                      | 0.000312 |
| synthesis of sterol                                   | 0.000323 |
| killing of lymphocytes                                | 0.000329 |
| fibrosarcoma                                          | 0.000341 |
| synthesis of cholesterol                              | 0.000341 |
| proliferation of endothelial cells                    | 0.000373 |
| growth of embryonic tissue                            | 0.00039  |
| accumulation of putrescine                            | 0.000398 |
| depletion of spermidine                               | 0.000398 |
| differentiation of chronic myelogenous leukemia cells | 0.000398 |
| high grade renal clear cell adenocarcinoma            | 0.000398 |
| regulation of spermidine                              | 0.000398 |
| hepatocellular carcinoma                              | 0.000399 |
| growth of neurites                                    | 0.000405 |
| quantity of blood cells                               | 0.000408 |
| proliferation of muscle cell lines                    | 0.00041  |
| cell transformation                                   | 0.00041  |
| G2 phase of cancer cells                              | 0.000411 |
| endoreduplication of cells                            | 0.000411 |
| release of oleic acid                                 | 0.000411 |
| cell movement of breast cancer cell lines             | 0.000423 |
| inhibition of tumor                                   | 0.000449 |

|                                                |          |
|------------------------------------------------|----------|
| abdominal carcinoma                            | 0.000453 |
| proliferation of hepatic stellate cells        | 0.000463 |
| memory                                         | 0.000478 |
| frequency of tumor                             | 0.00048  |
| skin tumor                                     | 0.000488 |
| colorectal neoplasia                           | 0.000489 |
| colony formation of carcinoma cell lines       | 0.00049  |
| infarction of heart                            | 0.000496 |
| accumulation of phagocytes                     | 0.000499 |
| differentiation of muscle cell lines           | 0.000504 |
| skin lesion                                    | 0.000518 |
| incidence of liver tumor                       | 0.000534 |
| metabolism of cholesterol                      | 0.000539 |
| adenoma                                        | 0.000565 |
| tauopathy                                      | 0.000575 |
| differentiation of connective tissue cells     | 0.000576 |
| malignant neoplasm of male genital organ       | 0.00058  |
| synthesis of steroid hormone                   | 0.000582 |
| quantity of leukocytes                         | 0.000586 |
| function of blood cells                        | 0.00059  |
| synthesis of steroid                           | 0.000603 |
| colony formation                               | 0.000604 |
| activation of leukocytes                       | 0.000607 |
| proliferation of urothelial cells              | 0.000608 |
| colony formation of prostate cancer cell lines | 0.000615 |
| prostate cancer                                | 0.000637 |
| metastatic solid tumor                         | 0.000639 |
| tumorigenesis of reproductive tract            | 0.000643 |
| acute coronary syndrome                        | 0.000646 |
| Prostate Cancer and Tumors                     | 0.000652 |
| necrosis of epithelial tissue                  | 0.000652 |
| quantity of epithelial tissue                  | 0.000662 |
| synthesis of terpenoid                         | 0.000664 |
| female genital neoplasm                        | 0.000669 |
| proliferation of hepatocytes                   | 0.000673 |
| female genital tract cancer                    | 0.000676 |
| formation of muscle                            | 0.000686 |



|                                                 |          |
|-------------------------------------------------|----------|
| T cell migration                                | 0.000691 |
| Viral Infection                                 | 0.000696 |
| Dementia                                        | 0.000698 |
| density of synapse                              | 0.000703 |
| migration of bladder cancer cell lines          | 0.000703 |
| re-entry into S phase                           | 0.000703 |
| formation of osteoclast precursor cells         | 0.000717 |
| amyloidosis                                     | 0.000726 |
| intraepithelial neoplasia                       | 0.000731 |
| invasion of carcinoma cell lines                | 0.00076  |
| male genital neoplasm                           | 0.000764 |
| volume of lesion                                | 0.000777 |
| regulation of leukocytes                        | 0.000777 |
| proliferation of lymphatic system cells         | 0.000795 |
| small-cell carcinoma                            | 0.000844 |
| formation of caveolae                           | 0.000855 |
| abnormal function of skin                       | 0.000863 |
| urogenital cancer                               | 0.000865 |
| quantity of blood vessel                        | 0.000872 |
| skin cancer                                     | 0.000893 |
| cytotoxicity of cytotoxic T cells               | 0.000906 |
| neoplasia of tumor cell lines                   | 0.000907 |
| breast cancer                                   | 0.000916 |
| apoptosis of carcinoma cell lines               | 0.000929 |
| size of animal                                  | 0.000937 |
| incidence of hepatocellular carcinoma           | 0.000941 |
| neoplasia of cells                              | 0.00095  |
| cell death of lymphocytes                       | 0.000956 |
| cell death of connective tissue cells           | 0.000968 |
| advanced malignant solid tumor                  | 0.000969 |
| inflammatory response                           | 0.000979 |
| cell proliferation of ovarian cancer cell lines | 0.000984 |
